# Supplementary material for: Effects of warm environmental temperature on human placental transcriptomes in term and preterm births
Source: Preprints.org preprint supplement (doi:10.20944/preprints202407.2445.v1), 2024-07-30
Supplement: Supplementary file 2 [file supplementary]

## Sheet: Table S1
Warm group (n = 10)
Groups	Participant IDs	Pregnancy outcome	Monthly mean temp at delievery Tmean (0C)	Monthly max temp at delievery Tmax (0C)	GEO accession number NCBI SRA (GSE211927)
Preterm-warm	SU0006	Preterm	15.7	20.8	SRR21186763
	SU0016	Preterm	13.2	19.16	SRR21186773
	SU0025	Preterm	16.3	20.8	SRR21186768
	SU0026	Preterm	16.3	20.8	SRR21186767
	SU0014	Preterm	13.1	20.8	SRR21186774
Term-warm	SU0019	Term	16.8	21.35	SRR21186772
	SU0020	Term	16.8	21.35	SRR21186771
	SU0024	Term	16.3	20.8	SRR21186762
	SU0007	Term	16.3	20.8	SRR21186781
	SU0054	Term	14.1	19.16	SRR21186745
Cold group (n = 15)
Preterm-cold	SU0045	Preterm	5.4	9.76	SRR21186749
	SU0047	Preterm	5.4	9.76	SRR21186748
	SU0049	Preterm	4.9	7.33	SRR21186753
	SU0030	Preterm	4.9	7.33	SRR21186761
	SU0058	Preterm	5.6	7.01	SRR21186744
	SU0071	Preterm	5.8	10.04	SRR21186778
	SU0091	Preterm	4	7.33	SRR21186776
Term-cold	SU0022	Term	5.4	9.76	SRR21186769
	SU0043	Term	5.4	9.76	SRR21186751
	SU0044	Term	5.4	9.76	SRR21186750
	SU0050	Term	4.9	7.33	SRR21186747
	SU0059	Term	5.6	7.01	SRR21186743
	SU0060	Term	5.6	7.01	SRR21186780
	SU0064	Term	5.1	7.66	SRR21186779
	SU0089	Term	4	7.33	SRR21186777

## Sheet: Table S2
edgeR DE analysis: Preterm-warm vs. Preterm-cold
ENTREZID	ENSEMBL	SYMBOL	GENENAME	logFC	logCPM	F	PValue	FDR
5265	ENSG00000197249	SERPINA1	serpin family A member 1	3.22932	5.10906	53.297	6.41036e-08	0.00182022
11224	ENSG00000136942	RPL35	ribosomal protein L35	2.18486	5.80132	44.1314	3.4881e-07	0.00495223
597	ENSG00000140379	BCL2A1	BCL2 related protein A1	4.15365	5.17779	41.2889	6.17349e-07	0.00584321
9560	ENSG00000276070	CCL4L2	C-C motif chemokine ligand 4 like 2	5.73543	3.7694	37.9548	1.24508e-06	0.00883849
2207	ENSG00000158869	FCER1G	Fc epsilon receptor Ig	2.20655	8.06507	36.1394	1.85316e-06	0.0105241
8364	ENSG00000197061	H4C3	H4 clustered histone 3	2.0944	8.52095	34.7894	2.51014e-06	0.0118792
645958	NA	RPS18P9	ribosomal protein S18 pseudogene 9	1.76885	6.84596	33.516	3.36325e-06	0.0123951
26	ENSG00000002726	AOC1	amine oxidase copper containing 1	-2.9345	7.51088	33.3542	3.49219e-06	0.0123951
100129424	NA	RPL19P12	ribosomal protein L19 pseudogene 12	1.76097	6.20036	32.0302	4.77034e-06	0.0150504
5266	ENSG00000124102	PI3	peptidase inhibitor 3	6.2997	3.78743	30.7692	6.46411e-06	0.0183548
3576	ENSG00000169429	CXCL8	C-X-C motif chemokine ligand 8	6.90348	6.98377	30.0084	7.79084e-06	0.0185637
3557	ENSG00000136689	IL1RN	interleukin 1 receptor antagonist	4.89867	4.93647	29.8658	8.07054e-06	0.0185637
6283	ENSG00000163221	S100A12	S100 calcium binding protein A12	3.5706	5.16422	29.6574	8.49895e-06	0.0185637
366	ENSG00000103569	AQP9	aquaporin 9	5.66478	2.47383	28.5668	1.11771e-05	0.0226696
56664	ENSG00000199990	VTRNA1-1	vault RNA 1-1	4.36125	2.69358	27.7301	1.38442e-05	0.0248086
163486	ENSG00000213047	DENND1B	DENN domain containing 1B	1.62713	5.61376	27.6925	1.39792e-05	0.0248086
414062	ENSG00000276085	CCL3L3	C-C motif chemokine ligand 3 like 3	7.39524	2.66872	30.0384	1.73946e-05	0.0282982
64231	ENSG00000110077	MS4A6A	membrane spanning 4-domains A6A	1.83252	7.73801	26.0435	2.15385e-05	0.0282982
6348	ENSG00000277632	CCL3	C-C motif chemokine ligand 3	4.15088	3.20072	25.9318	2.21894e-05	0.0282982
3248	ENSG00000164120	HPGD	15-hydroxyprostaglandin dehydrogenase	-2.30105	8.48726	25.7628	2.32156e-05	0.0282982
3903	ENSG00000167613	LAIR1	leukocyte associated immunoglobulin like receptor 1	3.15078	4.08479	25.7492	2.33e-05	0.0282982
4332	ENSG00000163563	MNDA	myeloid cell nuclear differentiation antigen	2.43189	4.32863	25.7411	2.33505e-05	0.0282982
389792	ENSG00000188483	IER5L	immediate early response 5 like	-2.69411	3.71722	25.7381	2.33694e-05	0.0282982
6168	ENSG00000197756	RPL37A	ribosomal protein L37a	1.7549	9.52929	25.6516	2.39182e-05	0.0282982
3728	ENSG00000173801	JUP	junction plakoglobin	-1.97059	9.42006	25.2599	2.65813e-05	0.0301911
5654	ENSG00000166033	HTRA1	HtrA serine peptidase 1	-2.82683	9.00567	25.0587	2.80717e-05	0.0306575
5341	ENSG00000115956	PLEK	pleckstrin	2.9643	5.49734	24.8731	2.95265e-05	0.031052
6279	ENSG00000143546	S100A8	S100 calcium binding protein A8	3.37102	7.88725	24.3319	3.42499e-05	0.034733
7940	ENSG00000204482	LST1	leukocyte specific transcript 1	2.14519	4.12552	24.1527	3.59881e-05	0.0352373
2357	ENSG00000171051	FPR1	formyl peptide receptor 1	2.08294	4.39317	23.7472	4.02814e-05	0.0367528
6364	ENSG00000115009	CCL20	C-C motif chemokine ligand 20	7.86827	3.10769	26.1011	4.2161e-05	0.0367528
50486	ENSG00000123689	G0S2	G0/G1 switch 2	5.16554	5.4718	23.5425	4.2656e-05	0.0367528
3553	ENSG00000125538	IL1B	interleukin 1 beta	4.9884	4.10719	23.5377	4.27132e-05	0.0367528
10653	ENSG00000167642	SPINT2	serine peptidase inhibitor, Kunitz type 2	-1.66602	7.88637	23.3008	4.56533e-05	0.0378486
116362	ENSG00000162444	RBP7	retinol binding protein 7	2.92737	4.06205	23.224	4.66526e-05	0.0378486
245802	ENSG00000166926	MS4A6E	membrane spanning 4-domains A6E	2.58479	3.02733	22.9533	5.0368e-05	0.0397278
128346	ENSG00000143110	C1orf162	chromosome 1 open reading frame 162	2.57678	4.08139	22.5655	5.62534e-05	0.0431707
5552	ENSG00000122862	SRGN	serglycin	1.57314	7.8059	22.3818	5.92949e-05	0.0443073
241	ENSG00000132965	ALOX5AP	arachidonate 5-lipoxygenase activating protein	2.1036	7.02272	22.0954	6.43978e-05	0.0443248
6351	ENSG00000275302	CCL4	C-C motif chemokine ligand 4	3.0131	3.14472	22.0855	6.45827e-05	0.0443248
4969	ENSG00000106809	OGN	osteoglycin	4.13353	3.01431	21.9745	6.66919e-05	0.0443248
2980	ENSG00000197273	GUCA2A	guanylate cyclase activator 2A	-2.57736	4.08367	21.9713	6.67535e-05	0.0443248
10370	ENSG00000164442	CITED2	Cbp/p300 interacting transactivator with Glu/Asp rich carboxy-terminal domain 2	-2.48474	3.74747	21.9522	6.71233e-05	0.0443248
2170	ENSG00000121769	FABP3	fatty acid binding protein 3	2.58525	2.86469	21.7677	7.0821e-05	0.0457037
922	ENSG00000073754	CD5L	CD5 molecule like	2.90677	3.29989	21.6761	7.27369e-05	0.0458366
514	ENSG00000124172	ATP5F1E	ATP synthase F1 subunit epsilon	1.44393	5.87008	21.5487	7.54949e-05	0.0458366
7076	ENSG00000102265	TIMP1	TIMP metallopeptidase inhibitor 1	1.70095	8.46314	21.5318	7.58698e-05	0.0458366
100128731	ENSG00000228474	OST4	oligosaccharyltransferase complex subunit 4, non-catalytic	1.43427	6.36968	21.1804	8.41199e-05	0.0497622
1088	ENSG00000124469	CEACAM8	CEA cell adhesion molecule 8	-3.38257	6.54373	21.0398	8.76884e-05	0.0508145
1396	ENSG00000213145	CRIP1	cysteine rich protein 1	-2.81822	4.79623	20.9459	9.01619e-05	0.0509393
4830	ENSG00000239672	NME1	NME/NM23 nucleoside diphosphate kinase 1	1.43041	5.79149	20.8965	9.14917e-05	0.0509393
125144	ENSG00000175061	SNHG29	small nucleolar RNA host gene 29	1.36688	8.46662	20.7368	9.59406e-05	0.0516377
388948	ENSG00000222005	LINC01118	long intergenic non-protein coding RNA 1118	-2.53378	6.06181	20.7214	9.63831e-05	0.0516377
1392	ENSG00000147571	CRH	corticotropin releasing hormone	-3.02808	9.32357	20.481	0.000103562	0.0536294
51693	ENSG00000167515	TRAPPC2L	trafficking protein particle complex subunit 2L	1.27342	6.50382	20.4371	0.000104933	0.0536294
10581	ENSG00000185201	IFITM2	interferon induced transmembrane protein 2	1.75117	8.33899	20.4107	0.000105767	0.0536294
5676	ENSG00000221878	PSG7	pregnancy specific beta-1-glycoprotein 7	-3.16779	11.4176	20.2248	0.000111848	0.0557178
949	ENSG00000073060	SCARB1	scavenger receptor class B member 1	-1.8319	6.84257	19.9035	0.000123263	0.0603458
1366	ENSG00000181885	CLDN7	claudin 7	-1.69216	5.95708	19.7169	0.000130464	0.0627884
7294	ENSG00000074966	TXK	TXK tyrosine kinase	-2.37235	4.34027	19.5949	0.000135417	0.0640446
91319	ENSG00000099958	DERL3	derlin 3	-3.08719	3.92101	19.543	0.000137585	0.0640446
1346	ENSG00000161281	COX7A1	cytochrome c oxidase subunit 7A1	1.84322	5.26236	19.2664	0.00014978	0.068597
2719	ENSG00000147257	GPC3	glypican 3	-1.8608	9.77873	19.1056	0.000157403	0.0704217
79833	ENSG00000152147	GEMIN6	gem nuclear organelle associated protein 6	1.74387	5.06931	19.0786	0.000158725	0.0704217
440567	ENSG00000233954	UQCRHL	ubiquinol-cytochrome c reductase hinge protein like	1.29418	7.42138	18.9562	0.00016486	0.0707814
55746	ENSG00000069248	NUP133	nucleoporin 133	-1.81899	4.64451	18.9177	0.000166844	0.0707814
101243545	ENSG00000240567	LINC02067	long intergenic non-protein coding RNA 2067	1.41707	9.67145	18.8232	0.000171819	0.0707814
1622	ENSG00000155368	DBI	diazepam binding inhibitor, acyl-CoA binding protein	1.35581	8.37807	18.8105	0.0001725	0.0707814
3240	ENSG00000257017	HP	haptoglobin	4.70247	1.7808	18.7707	0.000174651	0.0707814
11326	ENSG00000155659	VSIG4	V-set and immunoglobulin domain containing 4	1.69548	6.6727	18.7634	0.000175048	0.0707814
114769	ENSG00000204397	CARD16	caspase recruitment domain family member 16	1.58566	7.34743	18.6873	0.000179255	0.0707814
112597	ENSG00000222041	CYTOR	cytoskeleton regulator RNA	1.77269	5.79218	18.6833	0.000179477	0.0707814
2350	ENSG00000165457	FOLR2	folate receptor beta	1.72891	7.51436	18.4534	0.000192879	0.0750246
6648	ENSG00000291237	SOD2	superoxide dismutase 2	2.49672	6.21354	18.398	0.000196265	0.0753101
2783	ENSG00000172354	GNB2	G protein subunit beta 2	-1.55646	6.10863	18.3333	0.000200303	0.0758346
199	ENSG00000204472	AIF1	allograft inflammatory factor 1	1.56006	6.94095	18.2406	0.000206247	0.0770577
51491	ENSG00000048162	NOP16	NOP16 nucleolar protein	1.6628	5.62959	17.7205	0.0002433	0.088437
10590	ENSG00000079689	SCGN	secretagogin, EF-hand calcium binding protein	3.52617	3.06896	17.7118	0.000243976	0.088437
3046	ENSG00000213931	HBE1	hemoglobin subunit epsilon 1	2.26786	6.1185	17.6835	0.0002462	0.088437
541471	ENSG00000172965	MIR4435-2HG	MIR4435-2 host gene	1.67847	5.81037	17.6461	0.000249162	0.088437
4582	ENSG00000185499	MUC1	mucin 1, cell surface associated	-2.97716	4.7219	17.5112	0.000260179	0.0910871
728378	ENSG00000196604	POTEF	POTE ankyrin domain family member F	1.69741	3.63865	17.4772	0.000263044	0.0910871
440533	ENSG00000124467	PSG8	pregnancy specific beta-1-glycoprotein 8	-2.14924	10.1426	17.3603	0.000273129	0.0921965
118430	ENSG00000172551	MUCL1	mucin like 1	4.4969	1.3689	17.3321	0.000275626	0.0921965
79987	ENSG00000165124	SVEP1	sushi, von Willebrand factor type A, EGF and pentraxin domain containing 1	-1.90171	10.9245	17.3281	0.000275989	0.0921965
100422872	ENSG00000283429	MIR1244-3	microRNA 1244-3	-1.32597	5.84669	17.0748	0.000299581	0.0985557
1308	ENSG00000065618	COL17A1	collagen type XVII alpha 1 chain	-3.96082	3.5486	17.0503	0.000301967	0.0985557
284344	ENSG00000241104	LOC284344	uncharacterized LOC284344	-2.81821	10.6566	16.897	0.000317433	0.101482
3814	ENSG00000170498	KISS1	KiSS-1 metastasis suppressor	-3.09919	10.3559	16.8869	0.000318471	0.101482
644	ENSG00000106605	BLVRA	biliverdin reductase A	1.35952	6.53406	16.8565	0.000321654	0.101482
1117	ENSG00000064886	CHI3L2	chitinase 3 like 2	4.18248	1.91513	16.8208	0.000325422	0.101542
10632	ENSG00000167283	ATP5MG	ATP synthase membrane subunit g	1.23628	8.16726	16.752	0.00033284	0.102728
54732	ENSG00000184840	TMED9	transmembrane p24 trafficking protein 9	-1.16458	8.03839	16.6749	0.000341353	0.104223
221301	ENSG00000164451	CALHM4	calcium homeostasis modulator family member 4	-3.57286	2.52154	16.611	0.000348595	0.105302
11167	ENSG00000163430	FSTL1	follistatin like 1	-1.26259	7.20207	16.4494	0.000367649	0.107845
7371	ENSG00000143179	UCK2	uridine-cytidine kinase 2	-2.30147	6.22199	16.4434	0.000368378	0.107845
1844	ENSG00000158050	DUSP2	dual specificity phosphatase 2	4.27535	1.25259	16.41	0.000372455	0.107845
284232	NA	ANKRD20A9P	ankyrin repeat domain 20 family member A9, pseudogene	1.62279	4.70783	16.3076	0.000385286	0.107845
445582	ENSG00000188219	POTEE	POTE ankyrin domain family member E	1.60569	4.41867	16.2898	0.000387569	0.107845
10528	ENSG00000101361	NOP56	NOP56 ribonucleoprotein	1.30543	6.72832	16.2428	0.000393659	0.107845
4351	ENSG00000178802	MPI	mannose phosphate isomerase	1.83326	3.56173	16.2269	0.000395737	0.107845
65065	ENSG00000144426	NBEAL1	neurobeachin like 1	1.43461	10.2994	16.2251	0.000395975	0.107845
1164	ENSG00000123975	CKS2	CDC28 protein kinase regulatory subunit 2	1.41249	5.53464	16.213	0.000397567	0.107845
6275	ENSG00000196154	S100A4	S100 calcium binding protein A4	1.55926	7.24422	16.1708	0.000403178	0.107845
3005	ENSG00000189060	H1-0	H1.0 linker histone	-1.44011	4.62813	16.1586	0.000404821	0.107845
978	ENSG00000158825	CDA	cytidine deaminase	-2.63708	5.21916	16.157	0.000405037	0.107845
5436	ENSG00000168002	POLR2G	RNA polymerase II subunit G	1.24935	7.08923	16.1	0.000412782	0.107845
197370	ENSG00000169189	NSMCE1	NSE1 homolog, SMC5-SMC6 complex component	1.35842	6.97133	16.0984	0.000413006	0.107845
2335	ENSG00000115414	FN1	fibronectin 1	-2.53934	9.36242	16.0913	0.000413983	0.107845
9907	ENSG00000242802	AP5Z1	adaptor related protein complex 5 subunit zeta 1	-1.79561	4.30731	16.0529	0.00041931	0.108239
79651	ENSG00000129667	RHBDF2	rhomboid 5 homolog 2	1.70333	4.39599	15.9545	0.00043332	0.109074
6167	ENSG00000145592	RPL37	ribosomal protein L37	1.27589	9.04086	15.9344	0.000436237	0.109074
27335	ENSG00000178982	EIF3K	eukaryotic translation initiation factor 3 subunit K	1.1446	6.68218	15.8684	0.000445975	0.109074
5008	ENSG00000099985	OSM	oncostatin M	3.99205	2.19501	15.8682	0.000446006	0.109074
5672	ENSG00000243137	PSG4	pregnancy specific beta-1-glycoprotein 4	-2.68392	12.2317	15.8558	0.000447861	0.109074
80740	ENSG00000204421	LY6G6C	lymphocyte antigen 6 family member G6C	-1.9542	4.13249	15.8364	0.000450791	0.109074
202051	ENSG00000170469	SPATA24	spermatogenesis associated 24	2.57119	2.38148	15.8095	0.000454874	0.109074
100506115	ENSG00000224397	PELATON	plaque enriched lncRNA in atherosclerotic and inflammatory bowel macrophage regulation	3.24555	3.53334	15.8093	0.000454899	0.109074
4316	ENSG00000137673	MMP7	matrix metallopeptidase 7	5.0463	1.63003	15.7948	0.000457115	0.109074
6535	ENSG00000130821	SLC6A8	solute carrier family 6 member 8	-1.48429	5.03087	15.7385	0.000465839	0.109926
55301	ENSG00000152463	OLAH	oleoyl-ACP hydrolase	-2.22864	6.79018	15.722	0.000468429	0.109926
10577	ENSG00000119655	NPC2	NPC intracellular cholesterol transporter 2	1.49396	8.65174	15.68	0.000475097	0.110577
81533	ENSG00000129636	ITFG1	integrin alpha FG-GAP repeat containing 1	-1.17023	6.49081	15.6171	0.000485272	0.112027
26001	ENSG00000108523	RNF167	ring finger protein 167	-1.2471	5.60493	15.5912	0.000489526	0.112097
219995	ENSG00000166961	MS4A15	membrane spanning 4-domains A15	4.88635	1.20828	16.6811	0.000502743	0.114096
1371	ENSG00000080819	CPOX	coproporphyrinogen oxidase	-1.59303	4.66304	15.4916	0.00050629	0.114096
1153	ENSG00000099622	CIRBP	cold inducible RNA binding protein	-1.24992	6.14337	15.4023	0.000521835	0.116267
146556	ENSG00000153446	C16orf89	chromosome 16 open reading frame 89	4.27716	1.34839	15.3618	0.000529038	0.116267
4696	ENSG00000170906	NDUFA3	NADH:ubiquinone oxidoreductase subunit A3	1.15479	6.95505	15.322	0.00053625	0.116267
5473	ENSG00000163736	PPBP	pro-platelet basic protein	2.0184	4.34475	15.321	0.000536433	0.116267
1350	ENSG00000127184	COX7C	cytochrome c oxidase subunit 7C	1.16909	7.46156	15.2991	0.000540425	0.116267
92675	ENSG00000125821	DTD1	D-aminoacyl-tRNA deacylase 1	1.51976	4.09674	15.294	0.000541375	0.116267
267020	ENSG00000249222	ATP5MGL	ATP synthase membrane subunit g like	1.16985	8.06687	15.2654	0.000546672	0.116267
250	ENSG00000163283	ALPP	alkaline phosphatase, placental	-2.32962	8.6254	15.2453	0.000550413	0.116267
27306	ENSG00000163106	HPGDS	hematopoietic prostaglandin D synthase	1.78528	6.11089	15.2059	0.000557852	0.116267
441951	ENSG00000177410	ZFAS1	ZNFX1 antisense RNA 1	1.21227	8.25139	15.1957	0.000559787	0.116267
26280	ENSG00000189108	IL1RAPL2	interleukin 1 receptor accessory protein like 2	2.20614	2.94661	15.188	0.000561273	0.116267
6208	ENSG00000164587	RPS14	ribosomal protein S14	1.26254	8.29613	15.1429	0.000569979	0.116267
9915	ENSG00000172379	ARNT2	aryl hydrocarbon receptor nuclear translocator 2	-5.81988	2.271	15.7807	0.000575752	0.116267
3556	ENSG00000196083	IL1RAP	interleukin 1 receptor accessory protein	-1.58008	5.86946	15.1085	0.000576712	0.116267
9246	ENSG00000156587	UBE2L6	ubiquitin conjugating enzyme E2 L6	1.40424	5.7493	15.0732	0.000583714	0.116267
5034	ENSG00000185624	P4HB	prolyl 4-hydroxylase subunit beta	-1.16369	7.99125	15.0484	0.000588678	0.116267
23569	ENSG00000159339	PADI4	peptidyl arginine deiminase 4	3.86379	1.26273	15.014	0.000595656	0.116267
917	ENSG00000160654	CD3G	CD3 gamma subunit of T-cell receptor complex	4.8137	1.58071	15.0114	0.000596181	0.116267
3916	ENSG00000185896	LAMP1	lysosomal associated membrane protein 1	-1.19709	6.68248	14.9902	0.000600526	0.116267
55741	ENSG00000088298	EDEM2	ER degradation enhancing alpha-mannosidase like protein 2	-1.57477	4.90613	14.9875	0.000601089	0.116267
4481	ENSG00000038945	MSR1	macrophage scavenger receptor 1	1.88194	3.72785	14.9634	0.000606077	0.116267
5669	ENSG00000231924	PSG1	pregnancy specific beta-1-glycoprotein 1	-2.72029	12.1354	14.9433	0.000610269	0.116267
8569	ENSG00000079277	MKNK1	MAPK interacting serine/threonine kinase 1	1.77424	4.80033	14.925	0.00061412	0.116267
682	ENSG00000172270	BSG	basigin (Ok blood group)	-1.64379	6.98719	14.9246	0.000614194	0.116267
6155	ENSG00000131469	RPL27	ribosomal protein L27	1.34958	10.0735	14.8821	0.000623243	0.117039
222901	ENSG00000219451	RPL23P8	ribosomal protein L23 pseudogene 8	1.31352	9.93362	14.8499	0.000630178	0.117039
79145	ENSG00000170791	CHCHD7	coiled-coil-helix-coiled-coil-helix domain containing 7	1.25008	6.65435	14.7995	0.000641211	0.117039
400410	ENSG00000180953	ST20	suppressor of tumorigenicity 20	2.27718	3.21227	14.7961	0.000641965	0.117039
10871	ENSG00000167850	CD300C	CD300c molecule	3.99609	1.21498	14.7957	0.000642051	0.117039
90736	ENSG00000182518	VCF2	VCP nuclear cofactor family member 2	1.76376	3.81871	14.7882	0.000643714	0.117039
516	ENSG00000159199	ATP5MC1	ATP synthase membrane subunit c locus 1	1.14258	7.01505	14.7691	0.000647965	0.117039
102	ENSG00000137845	ADAM10	ADAM metallopeptidase domain 10	-1.42691	6.22505	14.744	0.000653596	0.117039
10855	ENSG00000173083	HPSE	heparanase	-2.16374	4.8308	14.7312	0.000656499	0.117039
53	ENSG00000134575	ACP2	acid phosphatase 2, lysosomal	-1.24051	6.63641	14.6963	0.000664455	0.117039
4501	ENSG00000187193	MT1X	metallothionein 1X	2.00102	3.92708	14.6876	0.000666438	0.117039
8733	ENSG00000197858	GPAA1	glycosylphosphatidylinositol anchor attachment 1	-1.90598	3.95513	14.682	0.000667735	0.117039
5297	ENSG00000241973	PI4KA	phosphatidylinositol 4-kinase alpha	-1.25457	5.57499	14.6276	0.000680415	0.11853
537	ENSG00000071553	ATP6AP1	ATPase H+ transporting accessory protein 1	-1.35366	6.51312	14.5966	0.000687757	0.118617
9349	ENSG00000125691	RPL23	ribosomal protein L23	1.23323	9.01612	14.5903	0.000689269	0.118617
200058	NA	NA	NA	-2.7983	2.95945	14.4892	0.000713886	0.120346
170627	ENSG00000171405	XAGE5	X antigen family member 5	1.22234	7.75358	14.4878	0.000714227	0.120346
147841	ENSG00000161888	SPC24	SPC24 component of NDC80 kinetochore complex	1.50752	4.17143	14.4788	0.000716463	0.120346
3001	ENSG00000145649	GZMA	granzyme A	3.9897	2.02723	14.449	0.000723908	0.120346
51639	ENSG00000115128	SF3B6	splicing factor 3b subunit 6	1.14866	7.05322	14.4461	0.000724645	0.120346
387129	ENSG00000187258	NPSR1	neuropeptide S receptor 1	4.73753	1.13053	15.4591	0.000727391	0.120346
54543	ENSG00000196683	TOMM7	translocase of outer mitochondrial membrane 7	1.26733	8.00504	14.412	0.000733311	0.120346
6165	ENSG00000182899	RPL35A	ribosomal protein L35a	1.33546	10.2583	14.4117	0.000733371	0.120346
101926911	ENSG00000214432	VPS33B-DT	VPS33B divergent transcript	1.195	6.11148	14.3781	0.000742009	0.120346
9375	ENSG00000125304	TM9SF2	transmembrane 9 superfamily member 2	-1.20899	7.38503	14.3756	0.000742656	0.120346
6633	ENSG00000125743	SNRPD2	small nuclear ribonucleoprotein D2 polypeptide	1.15802	8.07054	14.358	0.000747217	0.120346
342	ENSG00000291128	APOC1P1	apolipoprotein C1 pseudogene 1	1.65211	5.13147	14.345	0.000750618	0.120346
72	ENSG00000163017	ACTG2	actin gamma 2, smooth muscle	1.90119	7.76106	14.2791	0.000768097	0.120346
7348	ENSG00000114638	UPK1B	uroplakin 1B	-2.66438	3.28991	14.2548	0.000774649	0.120346
341	ENSG00000130208	APOC1	apolipoprotein C1	1.58547	6.92294	14.2525	0.000775267	0.120346
8723	ENSG00000114520	SNX4	sorting nexin 4	-1.62418	4.29275	14.2335	0.000780426	0.120346
51650	ENSG00000090263	MRPS33	mitochondrial ribosomal protein S33	1.18486	6.12409	14.233	0.000780583	0.120346
83874	ENSG00000099992	TBC1D10A	TBC1 domain family member 10A	-1.4483	5.27655	14.2087	0.000787245	0.120346
4489	ENSG00000205362	MT1A	metallothionein 1A	2.85106	2.302	14.2006	0.000789482	0.120346
6156	ENSG00000156482	RPL30	ribosomal protein L30	1.3755	10.6473	14.1996	0.000789745	0.120346
221692	ENSG00000112137	PHACTR1	phosphatase and actin regulator 1	3.05904	2.45287	14.1891	0.000792672	0.120346
101060091	NA	ACTR3-AS1	ACTR3 antisense RNA 1	3.66883	1.9359	14.1696	0.000798109	0.120346
23129	ENSG00000004399	PLXND1	plexin D1	-1.69833	4.58937	14.1685	0.000798419	0.120346
3007	ENSG00000124575	H1-3	H1.3 linker histone, cluster member	1.74513	3.24869	14.1591	0.000801034	0.120346
731424	ENSG00000251230	MIR3945HG	MIR3945 host gene	3.59305	1.53771	14.0788	0.000823939	0.122527
440482	ENSG00000290972	ANKRD20A5P	ankyrin repeat domain 20 family member A5, pseudogene	1.63953	5.70126	14.078	0.00082418	0.122527
121053	ENSG00000151131	NOPCHAP1	NOP protein chaperone 1	1.20295	5.61781	14.0353	0.000836621	0.122804
2321	ENSG00000102755	FLT1	fms related receptor tyrosine kinase 1	-1.49801	9.01989	14.0148	0.000842699	0.122804
143471	ENSG00000154611	PSMA8	proteasome 20S subunit alpha 8	4.03236	1.25952	14.0094	0.000844287	0.122804
3904	ENSG00000167618	LAIR2	leukocyte associated immunoglobulin like receptor 2	3.65213	3.75915	14.0046	0.000845712	0.122804
3015	ENSG00000164032	H2AZ1	H2A.Z variant histone 1	1.16875	7.53895	13.9675	0.00085684	0.122804
5680	ENSG00000243130	PSG11	pregnancy specific beta-1-glycoprotein 11	-2.34857	12.1763	13.9397	0.000865303	0.122804
100852410	NA	ZRANB2-DT	ZRANB2 divergent transcript	4.63084	1.03655	14.8937	0.000866938	0.122804
5236	ENSG00000079739	PGM1	phosphoglucomutase 1	-1.54811	5.33057	13.9235	0.000870246	0.122804
9076	ENSG00000163347	CLDN1	claudin 1	-1.76503	5.85709	13.9192	0.000871555	0.122804
3006	ENSG00000187837	H1-2	H1.2 linker histone, cluster member	-1.55608	6.43149	13.9047	0.000876056	0.122804
55268	ENSG00000121310	ECHDC2	enoyl-CoA hydratase domain containing 2	1.21533	6.37314	13.8946	0.000879183	0.122804
10434	ENSG00000120992	LYPLA1	lysophospholipase 1	-1.24591	6.40413	13.8907	0.000880368	0.122804
6184	ENSG00000163902	RPN1	ribophorin I	-1.22308	6.39835	13.8813	0.000883302	0.122804
641455	ENSG00000222036	POTEM	POTE ankyrin domain family member M	1.73995	5.1394	13.8708	0.000886595	0.122804
3045	ENSG00000223609	HBD	hemoglobin subunit delta	1.63737	6.12816	13.83	0.000899463	0.123982
84833	ENSG00000173915	ATP5MK	ATP synthase membrane subunit k	1.11928	7.42772	13.7957	0.000910461	0.124892
6169	ENSG00000172809	RPL38	ribosomal protein L38	1.39954	10.9875	13.7679	0.00091946	0.125165
7114	ENSG00000205542	TMSB4X	thymosin beta 4 X-linked	1.50144	10.6038	13.7624	0.000921269	0.125165
94120	ENSG00000164674	SYTL3	synaptotagmin like 3	3.87111	1.14346	13.7154	0.000936761	0.126664
10327	ENSG00000117448	AKR1A1	aldo-keto reductase family 1 member A1	1.0738	6.6536	13.6757	0.000950053	0.127156
127262	ENSG00000158109	TPRG1L	tumor protein p63 regulated 1 like	-1.35982	4.63351	13.6708	0.000951696	0.127156
10875	ENSG00000127951	FGL2	fibrinogen like 2	1.85914	3.90243	13.6556	0.000956859	0.127156
6235	ENSG00000213741	RPS29	ribosomal protein S29	1.28971	10.3893	13.6513	0.000958319	0.127156
916	ENSG00000198851	CD3E	CD3 epsilon subunit of T-cell receptor complex	4.68137	1.09636	14.5591	0.000963221	0.127212
4258	ENSG00000085871	MGST2	microsomal glutathione S-transferase 2	1.1404	7.10584	13.6172	0.000970023	0.127518
23658	ENSG00000106355	LSM5	LSM5 homolog, U6 small nuclear RNA and mRNA degradation associated	1.15808	6.4573	13.5236	0.00100295	0.130681
6222	ENSG00000231500	RPS18	ribosomal protein S18	1.20197	8.58094	13.5	0.00101142	0.130681
5204	ENSG00000123349	PFDN5	prefoldin subunit 5	1.28552	9.99731	13.493	0.00101395	0.130681
641311	ENSG00000213075	RPL31P11	ribosomal protein L31 pseudogene 11	1.24587	9.73679	13.4797	0.00101877	0.130681
6119	ENSG00000106399	RPA3	replication protein A3	1.20818	5.50717	13.4791	0.00101898	0.130681
2512	ENSG00000087086	FTL	ferritin light chain	1.55026	11.3769	13.4717	0.0010217	0.130681
100130520	ENSG00000284690	CD300H	CD300H molecule (gene/pseudogene)	4.95222	1.11614	14.3051	0.00104415	0.132459
10737	ENSG00000205853	RFPL3S	RFPL3 antisense	4.14356	1.00904	14.2963	0.00104707	0.132459
643161	ENSG00000188100	FAM25A	family with sequence similarity 25 member A	-2.5025	3.27898	13.3883	0.00105265	0.132459
60494	ENSG00000149201	CCDC81	coiled-coil domain containing 81	4.88676	1.14158	14.2749	0.00105426	0.132459
5158	ENSG00000133256	PDE6B	phosphodiesterase 6B	3.05285	2.21052	13.3675	0.00106053	0.13266
51248	ENSG00000120509	PDZD11	PDZ domain containing 11	1.41903	4.0341	13.2914	0.00108986	0.134116
55847	ENSG00000122873	CISD1	CDGSH iron sulfur domain 1	1.12083	5.42605	13.2907	0.00109016	0.134116
26520	ENSG00000100575	TIMM9	translocase of inner mitochondrial membrane 9	1.31278	5.47868	13.2826	0.00109332	0.134116
221143	ENSG00000150456	EEF1AKMT1	EEF1A lysine methyltransferase 1	1.27364	4.68222	13.2781	0.00109509	0.134116
6344	ENSG00000080293	SCTR	secretin receptor	4.64478	1.02977	14.154	0.00109579	0.134116
8519	ENSG00000185885	IFITM1	interferon induced transmembrane protein 1	1.36118	6.68703	13.2519	0.00110544	0.134716
618	ENSG00000236824	BCYRN1	brain cytoplasmic RNA 1	1.21242	7.64238	13.1843	0.0011327	0.137028
10272	ENSG00000070404	FSTL3	follistatin like 3	-2.65707	5.51121	13.1762	0.00113598	0.137028
27089	ENSG00000164405	UQCRQ	ubiquinol-cytochrome c reductase complex III subunit VII	1.06891	7.54592	13.1609	0.00114227	0.137028
4319	ENSG00000166670	MMP10	matrix metallopeptidase 10	5.34286	1.2839	14.0003	0.00115125	0.137028
23057	ENSG00000157064	NMNAT2	nicotinamide nucleotide adenylyltransferase 2	-2.93587	2.75406	13.139	0.00115131	0.137028
644068	NA	RPS14P3	ribosomal protein S14 pseudogene 3	1.31118	10.9864	13.1341	0.00115336	0.137028
90952	ENSG00000149564	ESAM	endothelial cell adhesion molecule	-1.31356	7.05721	13.0768	0.0011775	0.138815
116449	ENSG00000109684	CLNK	cytokine dependent hematopoietic cell linker	4.49548	1.03828	13.9286	0.00117818	0.138815
10537	ENSG00000213886	UBD	ubiquitin D	5.14987	1.24905	13.8765	0.00119814	0.140584
100505536	NA	ISM1-AS1	ISM1 antisense RNA 1	2.86246	1.80587	13.0073	0.00120745	0.141093
9168	ENSG00000034510	TMSB10	thymosin beta 10	1.34924	10.9163	12.9343	0.00123984	0.144283
834	ENSG00000137752	CASP1	caspase 1	1.33736	6.21827	12.8809	0.00126412	0.145301
51327	ENSG00000169877	AHSP	alpha hemoglobin stabilizing protein	1.78942	4.50434	12.8739	0.00126735	0.145301
7311	ENSG00000221983	UBA52	ubiquitin A-52 residue ribosomal protein fusion product 1	1.24499	10.1096	12.8736	0.00126749	0.145301
54187	ENSG00000095380	NANS	N-acetylneuraminate synthase	-1.82502	4.3071	12.8702	0.00126905	0.145301
80139	ENSG00000183779	ZNF703	zinc finger protein 703	-1.20467	7.16814	12.844	0.00128122	0.145608
4724	ENSG00000164258	NDUFS4	NADH:ubiquinone oxidoreductase subunit S4	1.17251	8.19895	12.8423	0.00128198	0.145608
1360	ENSG00000153002	CPB1	carboxypeptidase B1	4.08727	1.41672	12.798	0.00130283	0.147386
4725	ENSG00000168653	NDUFS5	NADH:ubiquinone oxidoreductase subunit S5	1.05721	8.26906	12.7671	0.00131758	0.148463
3115	ENSG00000223865	HLA-DPB1	major histocompatibility complex, class II, DP beta 1	2.24983	4.581	12.7269	0.00133708	0.150065
51699	ENSG00000111237	VPS29	VPS29 retromer complex component	1.08352	7.70786	12.7068	0.00134693	0.150575
90	ENSG00000115170	ACVR1	activin A receptor type 1	-1.55752	3.96323	12.694	0.00135322	0.150684
23479	ENSG00000136003	ISCU	iron-sulfur cluster assembly enzyme	-1.29791	5.97089	12.6675	0.00136643	0.151561
10399	ENSG00000204628	RACK1	receptor for activated C kinase 1	1.25389	10.7909	12.631	0.00138477	0.152509
10960	ENSG00000169223	LMAN2	lectin, mannose binding 2	-1.30155	6.06122	12.6285	0.00138604	0.152509
387103	ENSG00000203760	CENPW	centromere protein W	1.35396	5.72772	12.6126	0.00139414	0.152509
57413	ENSG00000121933	TMIGD3	transmembrane and immunoglobulin domain containing 3	1.50598	5.24558	12.6045	0.00139827	0.152509
5066	ENSG00000145730	PAM	peptidylglycine alpha-amidating monooxygenase	-1.59174	6.95847	12.5976	0.00140183	0.152509
728989	NA	LOC728989	phosphodiesterase 4D interacting protein pseudogene	-2.09056	3.2766	12.576	0.00141296	0.153032
64127	ENSG00000167207	NOD2	nucleotide binding oligomerization domain containing 2	3.81217	0.880249	13.3608	0.00141741	0.153032
22827	ENSG00000179950	PUF60	poly(U) binding splicing factor 60	-1.81037	3.99539	12.5383	0.00143264	0.15409
7706	ENSG00000121060	TRIM25	tripartite motif containing 25	1.20438	6.44292	12.4676	0.00147035	0.156982
3627	ENSG00000169245	CXCL10	C-X-C motif chemokine ligand 10	3.52632	3.42185	12.4672	0.00147058	0.156982
6355	ENSG00000108700	CCL8	C-C motif chemokine ligand 8	2.8867	2.78537	12.4464	0.00148186	0.157593
51148	ENSG00000167123	CERCAM	cerebral endothelial cell adhesion molecule	-1.5963	3.92159	12.4023	0.00150614	0.159578
51642	ENSG00000175581	MRPL48	mitochondrial ribosomal protein L48	1.06745	4.90543	12.3749	0.00152141	0.160596
376693	NA	RPS10P7	ribosomal protein S10 pseudogene 7	1.71992	3.07137	12.3528	0.00153388	0.160823
54209	ENSG00000095970	TREM2	triggering receptor expressed on myeloid cells 2	2.19462	3.30556	12.351	0.00153489	0.160823
23784	ENSG00000198062	POTEH	POTE ankyrin domain family member H	1.71577	4.641	12.3067	0.00156026	0.161372
9551	ENSG00000241468	ATP5MF	ATP synthase membrane subunit f	1.10446	6.47164	12.3042	0.00156165	0.161372
84525	ENSG00000171476	HOPX	HOP homeobox	-1.58655	8.95897	12.3028	0.00156247	0.161372
4706	ENSG00000004779	NDUFAB1	NADH:ubiquinone oxidoreductase subunit AB1	-2.02352	5.98213	12.3022	0.00156285	0.161372
3624	ENSG00000122641	INHBA	inhibin subunit beta A	-1.90749	8.90026	12.2735	0.00157951	0.162501
79586	ENSG00000123989	CHPF	chondroitin polymerizing factor	-1.13816	7.04791	12.1976	0.00162455	0.166531
57823	ENSG00000026751	SLAMF7	SLAM family member 7	4.86645	1.13845	12.934	0.00163245	0.166739
2192	ENSG00000077942	FBLN1	fibulin 1	-1.75787	10.9767	12.1404	0.00165942	0.168886
4922	ENSG00000133636	NTS	neurotensin	3.59415	2.98249	12.1071	0.00168004	0.170374
1329	ENSG00000135940	COX5B	cytochrome c oxidase subunit 5B	-2.34337	6.19538	12.055	0.00171298	0.172043
6872	ENSG00000147133	TAF1	TATA-box binding protein associated factor 1	-1.49546	4.3036	12.0524	0.00171461	0.172043
4697	ENSG00000189043	NDUFA4	NDUFA4 mitochondrial complex associated	1.10094	6.47575	12.0523	0.00171467	0.172043
51019	ENSG00000120860	WASHC3	WASH complex subunit 3	1.28132	4.68741	11.9998	0.0017486	0.174829
8728	ENSG00000135074	ADAM19	ADAM metallopeptidase domain 19	-1.14709	5.36272	11.9613	0.00177387	0.175635
100506299	NA	ID2-AS1	ID2 antisense RNA 1	3.76992	0.856657	12.6767	0.00177921	0.175635
23471	ENSG00000067167	TRAM1	translocation associated membrane protein 1	-1.06502	6.35834	11.9305	0.00179439	0.175635
5427	ENSG00000100479	POLE2	DNA polymerase epsilon 2, accessory subunit	3.00464	1.63729	11.9122	0.00180674	0.175635
100422885	ENSG00000283498	MIR1244-2	microRNA 1244-2	-1.1484	5.77673	11.9069	0.0018103	0.175635
51293	ENSG00000167775	CD320	CD320 molecule	-1.81386	5.3827	11.9044	0.00181201	0.175635
51006	ENSG00000080189	SLC35C2	solute carrier family 35 member C2	-0.994403	6.76821	11.8852	0.00182504	0.175635
22834	ENSG00000198740	ZNF652	zinc finger protein 652	-1.01941	6.03268	11.8824	0.00182698	0.175635
6636	ENSG00000139343	SNRPF	small nuclear ribonucleoprotein polypeptide F	1.12632	8.21791	11.8784	0.00182973	0.175635
653781	ENSG00000222038	POTEJ	POTE ankyrin domain family member J	1.54498	4.32235	11.8774	0.00183041	0.175635
85445	ENSG00000152910	CNTNAP4	contactin associated protein family member 4	4.03044	0.9888	12.5861	0.0018343	0.175635
4499	ENSG00000205364	MT1M	metallothionein 1M	2.26592	2.72638	11.8617	0.00184118	0.175635
6035	ENSG00000129538	RNASE1	ribonuclease A family member 1, pancreatic	1.17579	8.84754	11.8599	0.00184245	0.175635
9636	ENSG00000187608	ISG15	ISG15 ubiquitin like modifier	-4.2718	2.55301	11.8587	0.00184326	0.175635
5816	ENSG00000100362	PVALB	parvalbumin	2.54203	2.45271	11.8305	0.00186283	0.176907
3276	ENSG00000126457	PRMT1	protein arginine methyltransferase 1	-1.10892	5.82566	11.8161	0.00187292	0.177272
440574	ENSG00000173436	MICOS10	mitochondrial contact site and cristae organizing system subunit 10	1.01481	5.99733	11.7931	0.00188921	0.17822
284076	ENSG00000170703	TTLL6	tubulin tyrosine ligase like 6	5.05178	1.12938	12.4847	0.00189823	0.178477
3122	ENSG00000204287	HLA-DRA	major histocompatibility complex, class II, DR alpha	1.90974	4.70389	11.7546	0.00191667	0.179284
10268	ENSG00000122679	RAMP3	receptor activity modifying protein 3	-3.75054	2.21464	11.7508	0.00191943	0.179284
7077	ENSG00000035862	TIMP2	TIMP metallopeptidase inhibitor 2	-1.53434	10.9608	11.7257	0.00193766	0.179675
4122	ENSG00000196547	MAN2A2	mannosidase alpha class 2A member 2	-1.50862	4.06551	11.7172	0.00194382	0.179675
23412	ENSG00000148444	COMMD3	COMM domain containing 3	1.23376	4.36047	11.7021	0.00195492	0.179675
79022	ENSG00000134291	TMEM106C	transmembrane protein 106C	1.04244	5.77379	11.6997	0.00195668	0.179675
374291	ENSG00000115286	NDUFS7	NADH:ubiquinone oxidoreductase core subunit S7	-4.16285	4.24898	11.6959	0.00195946	0.179675
79770	ENSG00000113621	TXNDC15	thioredoxin domain containing 15	-1.3865	4.89689	11.6878	0.00196548	0.179675
64065	ENSG00000112378	PERP	p53 apoptosis effector related to PMP22	-1.20889	6.67595	11.6845	0.00196791	0.179675
643008	ENSG00000204323	SMIM5	small integral membrane protein 5	-1.86271	4.10538	11.6636	0.00198347	0.179854
56271	ENSG00000102409	BEX4	brain expressed X-linked 4	-1.17006	5.63453	11.6634	0.00198361	0.179854
950	ENSG00000138760	SCARB2	scavenger receptor class B member 2	-1.20668	7.30582	11.6564	0.00198888	0.179854
9415	ENSG00000134824	FADS2	fatty acid desaturase 2	1.7925	4.22986	11.6334	0.00200621	0.180845
2201	ENSG00000138829	FBN2	fibrillin 2	-1.04326	8.27221	11.622	0.00201481	0.181046
57415	ENSG00000114405	CEP15	centrosomal protein 15	1.47604	4.73384	11.6034	0.00202901	0.18136
25893	ENSG00000162722	TRIM58	tripartite motif containing 58	-2.13348	3.45277	11.5998	0.0020318	0.18136
84300	ENSG00000137288	UQCC2	ubiquinol-cytochrome c reductase complex assembly factor 2	1.15351	7.4161	11.5924	0.00203746	0.18136
7001	ENSG00000167815	PRDX2	peroxiredoxin 2	1.03263	8.05001	11.5162	0.00209701	0.186077
10148	ENSG00000105246	EBI3	Epstein-Barr virus induced 3	-2.07949	11.2508	11.488	0.00211957	0.187021
539	ENSG00000241837	ATP5PO	ATP synthase peripheral stalk subunit OSCP	1.04925	7.62801	11.4864	0.00212082	0.187021
9014	ENSG00000115750	TAF1B	TATA-box binding protein associated factor, RNA polymerase I subunit B	-1.56047	5.69874	11.4686	0.00213521	0.187707
647979	ENSG00000260032	NORAD	non-coding RNA activated by DNA damage	-0.992743	6.43312	11.4579	0.00214389	0.187888
5768	ENSG00000116260	QSOX1	quiescin sulfhydryl oxidase 1	-1.39633	5.92659	11.445	0.00215439	0.188227
64976	ENSG00000185608	MRPL40	mitochondrial ribosomal protein L40	1.02047	6.03956	11.4014	0.00219034	0.190782
653269	ENSG00000196834	POTEI	POTE ankyrin domain family member I	1.63939	4.32134	11.3535	0.00223057	0.193174
100129961	NA	CCNT2-AS1	CCNT2 antisense RNA 1	3.59157	1.28489	11.3525	0.00223142	0.193174
55967	ENSG00000184752	NDUFA12	NADH:ubiquinone oxidoreductase subunit A12	1.07525	8.6322	11.3372	0.00224447	0.193713
375133	ENSG00000183506	PI4KAP2	phosphatidylinositol 4-kinase alpha pseudogene 2	-1.17356	5.26069	11.3128	0.00226539	0.194623
1466	ENSG00000175183	CSRP2	cysteine and glycine rich protein 2	1.09392	6.90181	11.3078	0.00226976	0.194623
6635	ENSG00000182004	SNRPE	small nuclear ribonucleoprotein polypeptide E	0.974024	5.75988	11.2956	0.00228029	0.194623
91584	ENSG00000221866	PLXNA4	plexin A4	2.53549	2.32593	11.2932	0.00228242	0.194623
130540	ENSG00000155749	FLACC1	flagellum associated containing coiled-coil domains 1	3.45245	1.09145	11.2296	0.00233843	0.198728
3336	ENSG00000115541	HSPE1	heat shock protein family E (Hsp10) member 1	1.07654	7.46097	11.2093	0.00235664	0.198728
29097	ENSG00000143771	CNIH4	cornichon family AMPA receptor auxiliary protein 4	1.08015	7.15472	11.2081	0.00235777	0.198728
26065	ENSG00000257103	LSM14A	LSM14A mRNA processing body assembly factor	-0.976044	6.31497	11.1997	0.00236538	0.198728
91937	ENSG00000145850	TIMD4	T cell immunoglobulin and mucin domain containing 4	2.46591	2.96103	11.1796	0.00238358	0.198728
104310353	ENSG00000233080	LINC01399	long intergenic non-protein coding RNA 1399	1.47448	3.56945	11.1774	0.00238557	0.198728
1259	ENSG00000198515	CNGA1	cyclic nucleotide gated channel subunit alpha 1	-1.82032	4.25593	11.1769	0.00238607	0.198728
6224	ENSG00000008988	RPS20	ribosomal protein S20	1.13704	9.96878	11.1764	0.00238656	0.198728
56891	ENSG00000006659	LGALS14	galectin 14	-2.18988	9.44222	11.1505	0.00241027	0.199659
341883	ENSG00000131951	LRRC9	leucine rich repeat containing 9	4.84441	1.06372	11.7853	0.0024118	0.199659
619190	NA	FDPSP2	farnesyl diphosphate synthase pseudogene 2	1.46435	3.70616	11.1383	0.00242162	0.19987
5788	ENSG00000081237	PTPRC	protein tyrosine phosphatase receptor type C	1.4603	4.434	11.1309	0.00242842	0.19987
101927797	ENSG00000224141	MIR548XHG	MIR548X host gene	3.63316	0.855733	11.7535	0.00243851	0.20012
117289	ENSG00000164691	TAGAP	T cell activation RhoGTPase activating protein	2.8478	1.81432	11.0801	0.00247619	0.202238
11041	ENSG00000174684	B4GAT1	beta-1,4-glucuronyltransferase 1	-1.21844	5.91495	11.0658	0.00248981	0.202238
123775	ENSG00000166455	C16orf46	chromosome 16 open reading frame 46	1.22721	5.30113	11.0616	0.00249384	0.202238
6910	ENSG00000089225	TBX5	T-box transcription factor 5	-2.82921	2.22302	11.0516	0.0025035	0.202238
100133093	ENSG00000189090	FAM25G	family with sequence similarity 25 member G	-2.44654	2.7297	11.0378	0.0025168	0.202238
6845	ENSG00000124333	VAMP7	vesicle associated membrane protein 7	-1.07424	5.28917	11.0373	0.00251728	0.202238
23305	ENSG00000164398	ACSL6	acyl-CoA synthetase long chain family member 6	3.65944	0.858432	11.6574	0.0025213	0.202238
90523	ENSG00000146147	MLIP	muscular LMNA interacting protein	3.65944	0.858432	11.6574	0.0025213	0.202238
130106	ENSG00000157884	CIB4	calcium and integrin binding family member 4	3.66391	0.858871	11.6388	0.00253772	0.202982
3880	ENSG00000171345	KRT19	keratin 19	-1.39977	7.45552	11.0052	0.00254852	0.203273
1284	ENSG00000134871	COL4A2	collagen type IV alpha 2 chain	-1.00843	7.26347	10.9754	0.00257789	0.20504
283820	ENSG00000185164	NOMO2	NODAL modulator 2	-1.20223	6.22821	10.9343	0.00261905	0.205855
284348	ENSG00000159871	LYPD5	LY6/PLAUR domain containing 5	-2.2856	4.67696	10.9267	0.00262674	0.205855
59286	ENSG00000198258	UBL5	ubiquitin like 5	0.949169	7.53415	10.9245	0.00262896	0.205855
100506898	NA	MAGOH2P	mago homolog 2, pseudogene	1.08893	5.41596	10.9224	0.0026311	0.205855
408050	ENSG00000103226	NOMO3	NODAL modulator 3	-1.17596	6.19113	10.9202	0.00263332	0.205855
84938	ENSG00000125703	ATG4C	autophagy related 4C cysteine peptidase	-1.52126	4.69657	10.9008	0.00265314	0.205855
6284	ENSG00000189171	S100A13	S100 calcium binding protein A13	1.03675	7.28158	10.9005	0.00265346	0.205855
3074	ENSG00000049860	HEXB	hexosaminidase subunit beta	-1.22109	6.83616	10.8953	0.00265872	0.205855
51691	ENSG00000128534	LSM8	LSM8 homolog, U6 small nuclear RNA associated	1.03857	6.43578	10.8931	0.00266102	0.205855
6520	ENSG00000168003	SLC3A2	solute carrier family 3 member 2	-1.53269	5.48334	10.8829	0.00267147	0.205855
1894	ENSG00000114346	ECT2	epithelial cell transforming 2	1.18143	5.13727	10.8801	0.00267441	0.205855
9775	ENSG00000141543	EIF4A3	eukaryotic translation initiation factor 4A3	-1.07404	5.81405	10.8794	0.00267513	0.205855
1959	ENSG00000122877	EGR2	early growth response 2	4.12305	0.906625	11.4573	0.00270382	0.206927
25802	ENSG00000163431	LMOD1	leiomodin 1	1.47119	5.19855	10.8447	0.00271122	0.206927
129804	ENSG00000144152	FBLN7	fibulin 7	-1.66162	3.83623	10.8296	0.00272714	0.206927
3623	ENSG00000123999	INHA	inhibin subunit alpha	-1.85361	3.95077	10.825	0.00273199	0.206927
1349	ENSG00000131174	COX7B	cytochrome c oxidase subunit 7B	1.02366	8.36744	10.8213	0.00273589	0.206927
9332	ENSG00000177575	CD163	CD163 molecule	1.34724	7.07296	10.8198	0.00273746	0.206927
2548	ENSG00000171298	GAA	alpha glucosidase	-1.27929	5.87861	10.8013	0.00275716	0.206927
483	ENSG00000069849	ATP1B3	ATPase Na+/K+ transporting subunit beta 3	-0.986833	5.60669	10.7983	0.00276037	0.206927
151887	ENSG00000091986	CCDC80	coiled-coil domain containing 80	1.29898	6.01827	10.7929	0.00276611	0.206927
84987	ENSG00000178449	COX14	cytochrome c oxidase assembly factor COX14	0.973443	6.5781	10.7918	0.00276728	0.206927
3308	ENSG00000170606	HSPA4	heat shock protein family A (Hsp70) member 4	-1.01567	5.61488	10.79	0.00276923	0.206927
23385	ENSG00000162736	NCSTN	nicastrin	-1.0611	6.26154	10.7774	0.00278271	0.207096
151188	ENSG00000177917	ARL6IP6	ADP ribosylation factor like GTPase 6 interacting protein 6	-1.26613	4.26644	10.7743	0.00278608	0.207096
5612	ENSG00000137492	THAP12	THAP domain containing 12	-1.33295	4.06294	10.7522	0.00281006	0.208199
4707	ENSG00000183648	NDUFB1	NADH:ubiquinone oxidoreductase subunit B1	1.01985	7.37588	10.7471	0.00281558	0.208199
9450	ENSG00000112799	LY86	lymphocyte antigen 86	1.69863	4.34713	10.7374	0.0028263	0.208449
55227	ENSG00000137269	LRRC1	leucine rich repeat containing 1	-1.1805	5.42449	10.7094	0.00285714	0.21003
4521	ENSG00000106268	NUDT1	nudix hydrolase 1	1.43384	3.93351	10.7045	0.00286253	0.21003
55505	ENSG00000182117	NOP10	NOP10 ribonucleoprotein	1.04029	7.59705	10.6922	0.00287631	0.210253
977	ENSG00000177697	CD151	CD151 molecule (Raph blood group)	-1.58466	4.64985	10.6872	0.0028819	0.210253
8702	ENSG00000121578	B4GALT4	beta-1,4-galactosyltransferase 4	-1.1288	5.56548	10.6819	0.00288779	0.210253
4493	ENSG00000169715	MT1E	metallothionein 1E	1.46594	6.13056	10.622	0.0029559	0.211609
23420	ENSG00000103512	NOMO1	NODAL modulator 1	-1.11279	5.9487	10.608	0.00297206	0.211609
100188893	ENSG00000214736	TOMM6	translocase of outer mitochondrial membrane 6	1.00879	7.52097	10.6032	0.0029776	0.211609
27063	ENSG00000148677	ANKRD1	ankyrin repeat domain 1	2.3789	4.28287	10.6029	0.00297791	0.211609
3003	ENSG00000113088	GZMK	granzyme K	4.06699	0.900411	11.1799	0.0029814	0.211609
55553	ENSG00000110693	SOX6	SRY-box transcription factor 6	2.20494	2.66145	10.5983	0.00298331	0.211609
140606	ENSG00000198832	SELENOM	selenoprotein M	-2.19374	3.66278	10.5981	0.00298352	0.211609
6236	ENSG00000166592	RRAD	RRAD, Ras related glycolysis inhibitor and calcium channel regulator	-5.07686	1.82359	10.9443	0.00298643	0.211609
116254	ENSG00000055211	GINM1	glycosylated integral membrane protein 1	-1.52554	4.63443	10.594	0.00298835	0.211609
152816	ENSG00000174792	ODAPH	odontogenesis associated phosphoprotein	-2.01506	3.95711	10.5938	0.00298858	0.211609
146225	ENSG00000140932	CMTM2	CKLF like MARVEL transmembrane domain containing 2	2.98642	2.62721	10.5825	0.00300177	0.211609
276	ENSG00000237763	AMY1A	amylase alpha 1A	3.14891	1.19072	10.5687	0.00301795	0.211609
278	ENSG00000187733	AMY1C	amylase alpha 1C	3.14891	1.19072	10.5687	0.00301795	0.211609
60675	ENSG00000163421	PROK2	prokineticin 2	3.53929	2.04022	10.5658	0.00302138	0.211609
84848	NA	MIR503HG	MIR503 host gene	-1.33139	5.16973	10.5569	0.00303187	0.211609
10567	ENSG00000105404	RABAC1	Rab acceptor 1	-2.26446	4.814	10.5553	0.00303374	0.211609
84501	ENSG00000204991	SPIRE2	spire type actin nucleation factor 2	-0.901437	5.98746	10.5495	0.00304063	0.211609
105372109	NA	NA	NA	3.64076	0.837954	11.1131	0.00305277	0.211609
10066	ENSG00000140497	SCAMP2	secretory carrier membrane protein 2	-1.02232	6.93414	10.5363	0.00305632	0.211609
285362	ENSG00000144455	SUMF1	sulfatase modifying factor 1	-1.36759	3.77702	10.534	0.00305907	0.211609
11341	ENSG00000164106	SCRG1	stimulator of chondrogenesis 1	3.61515	1.4736	10.5293	0.00306463	0.211609
963	ENSG00000143119	CD53	CD53 molecule	1.31969	5.30565	10.5246	0.00307036	0.211609
9263	ENSG00000164543	STK17A	serine/threonine kinase 17a	-1.05655	5.40912	10.5174	0.00307894	0.211686
4685	ENSG00000154654	NCAM2	neural cell adhesion molecule 2	4.26464	0.921109	11.0633	0.00310731	0.212838
6166	ENSG00000165502	RPL36AL	ribosomal protein L36a like	1.00241	8.42175	10.4912	0.00311069	0.212838
10261	ENSG00000140749	IGSF6	immunoglobulin superfamily member 6	1.5778	5.56741	10.4734	0.00313235	0.21322
6947	ENSG00000134827	TCN1	transcobalamin 1	3.62752	0.872797	11.0323	0.00314173	0.21322
200916	ENSG00000163584	RPL22L1	ribosomal protein L22 like 1	1.14927	5.80572	10.4654	0.00314215	0.21322
6631	ENSG00000124562	SNRPC	small nuclear ribonucleoprotein polypeptide C	0.888626	6.06674	10.4558	0.00315401	0.21322
629	ENSG00000243649	CFB	complement factor B	-1.44122	6.52884	10.4394	0.00317439	0.21322
79139	ENSG00000136986	DERL1	derlin 1	-1.14447	4.98927	10.4283	0.00318816	0.21322
51501	ENSG00000149196	HIKESHI	heat shock protein nuclear import factor hikeshi	0.986677	5.92617	10.4231	0.00319465	0.21322
147111	ENSG00000185269	NOTUM	notum, palmitoleoyl-protein carboxylesterase	-2.25251	4.62984	10.4214	0.00319687	0.21322
692234	NA	SNORD103A	small nucleolar RNA, C/D box 103A	3.14404	0.996651	10.4143	0.00320569	0.21322
4250	ENSG00000110484	SCGB2A2	secretoglobin family 2A member 2	4.44802	0.979062	10.9714	0.00321062	0.21322
8807	ENSG00000115607	IL18RAP	interleukin 18 receptor accessory protein	4.44802	0.979062	10.9714	0.00321062	0.21322
9768	ENSG00000166803	PCLAF	PCNA clamp associated factor	1.48987	5.61597	10.4074	0.00321443	0.21322
7448	ENSG00000109072	VTN	vitronectin	1.84606	3.24072	10.3988	0.00322526	0.21322
101930023	NA	LINC02391	long intergenic non-protein coding RNA 2391	3.93005	0.872451	10.9532	0.00323158	0.21322
10563	ENSG00000156234	CXCL13	C-X-C motif chemokine ligand 13	4.29494	0.960319	10.9451	0.00324087	0.21322
135295	ENSG00000154548	SRSF12	serine and arginine rich splicing factor 12	3.26713	0.988648	10.3847	0.00324311	0.21322
51373	ENSG00000239789	MRPS17	mitochondrial ribosomal protein S17	1.16343	5.10903	10.3768	0.00325325	0.21322
11236	ENSG00000170881	RNF139	ring finger protein 139	-1.13831	4.93036	10.3749	0.00325569	0.21322
313	ENSG00000136250	AOAH	acyloxyacyl hydrolase	1.88294	3.53677	10.3627	0.00327123	0.21322
645745	ENSG00000244020	MT1HL1	metallothionein 1H like 1	2.29898	2.65098	10.361	0.00327349	0.21322
754	ENSG00000183255	PTTG1IP	PTTG1 interacting protein	-1.16551	7.08295	10.356	0.00327985	0.21322
105372818	NA	NA	NA	-1.12024	6.77538	10.3548	0.00328146	0.21322
102723728	ENSG00000185164	LOC102723728	nodal modulator 3-like	-1.17366	6.10821	10.3336	0.00330895	0.214285
4257	ENSG00000008394	MGST1	microsomal glutathione S-transferase 1	2.31251	2.55933	10.3222	0.00332378	0.214285
102723508	ENSG00000232593	KANTR	KANTR integral membrane protein	1.79495	2.56136	10.3209	0.0033254	0.214285
59	ENSG00000107796	ACTA2	actin alpha 2, smooth muscle	1.50648	9.03384	10.3189	0.00332804	0.214285
951	ENSG00000104894	CD37	CD37 molecule	1.58008	3.24667	10.3057	0.00334537	0.214833
203286	ENSG00000165138	ANKS6	ankyrin repeat and sterile alpha motif domain containing 6	-4.51373	1.49088	10.6321	0.00335169	0.214833
5155	ENSG00000100311	PDGFB	platelet derived growth factor subunit B	-1.25038	4.90466	10.2762	0.00338449	0.216447
2257	ENSG00000114279	FGF12	fibroblast growth factor 12	-2.03155	3.2783	10.2671	0.00339661	0.216734
3998	ENSG00000074695	LMAN1	lectin, mannose binding 1	-1.04997	7.27987	10.2571	0.00341002	0.216964
2932	ENSG00000082701	GSK3B	glycogen synthase kinase 3 beta	-1.0497	5.1441	10.253	0.0034155	0.216964
9087	ENSG00000154620	TMSB4Y	thymosin beta 4 Y-linked	3.14456	1.25642	10.2451	0.00342618	0.217157
10580	ENSG00000095637	SORBS1	sorbin and SH3 domain containing 1	-1.15719	5.19035	10.2227	0.00345663	0.218599
6603	ENSG00000108604	SMARCD2	SWI/SNF related, matrix associated, actin dependent regulator of chromatin, subfamily d, member 2	-1.14564	5.80903	10.2153	0.00346671	0.21871
4853	ENSG00000134250	NOTCH2	notch receptor 2	-1.15606	4.80462	10.2099	0.00347404	0.21871
84693	ENSG00000124370	MCEE	methylmalonyl-CoA epimerase	1.2294	4.4292	10.2028	0.00348388	0.21871
432369	NA	ATP5F1EP2	ATP synthase F1 subunit epsilon pseudogene 2	1.00817	9.10383	10.1966	0.00349233	0.21871
211	ENSG00000023330	ALAS1	5'-aminolevulinate synthase 1	-1.2327	6.27323	10.1914	0.00349949	0.21871
353	ENSG00000198931	APRT	adenine phosphoribosyltransferase	-1.79459	4.3639	10.1877	0.0035046	0.21871
100507240	ENSG00000278338	VWA8-AS1	VWA8 antisense RNA 1 (head to head)	3.48093	0.816459	10.7073	0.00352932	0.219289
100507098	ENSG00000241684	ADAMTS9-AS2	ADAMTS9 antisense RNA 2	3.48093	0.816459	10.7073	0.00352932	0.219289
7276	ENSG00000118271	TTR	transthyretin	-6.48543	2.74286	10.4498	0.0035873	0.222405
103352539	ENSG00000238113	LINC01410	long intergenic non-protein coding RNA 1410	2.434	2.1152	10.1096	0.00361456	0.222727
4916	ENSG00000140538	NTRK3	neurotrophic receptor tyrosine kinase 3	3.38695	1.13339	10.1048	0.00362142	0.222727
5330	ENSG00000137841	PLCB2	phospholipase C beta 2	3.23278	1.38556	10.101	0.0036269	0.222727
1889	ENSG00000117298	ECE1	endothelin converting enzyme 1	-1.31297	5.38573	10.0988	0.00363006	0.222727
25870	ENSG00000129103	SUMF2	sulfatase modifying factor 2	-1.99695	4.12448	10.0976	0.00363172	0.222727
5329	ENSG00000011422	PLAUR	plasminogen activator, urokinase receptor	2.28626	3.30299	10.0684	0.00367405	0.224838
2204	ENSG00000186431	FCAR	Fc alpha receptor	3.37334	1.38995	10.0562	0.00369191	0.225445
79188	ENSG00000170876	TMEM43	transmembrane protein 43	-0.890534	6.65594	10.0415	0.00371345	0.226274
283385	ENSG00000139714	MORN3	MORN repeat containing 3	-1.58729	4.69907	10.0289	0.0037321	0.226923
6892	ENSG00000231925	TAPBP	TAP binding protein	-1.21876	5.78073	10.0062	0.00376585	0.227973
2879	ENSG00000167468	GPX4	glutathione peroxidase 4	-2.17857	5.25901	9.99598	0.00378119	0.227973
25904	ENSG00000182973	CNOT10	CCR4-NOT transcription complex subunit 10	-1.58559	3.62931	9.99194	0.00378726	0.227973
341208	ENSG00000181333	HEPHL1	hephaestin like 1	3.41907	1.49306	9.98873	0.0037921	0.227973
1475	ENSG00000121552	CSTA	cystatin A	1.32916	7.73794	9.97724	0.00380946	0.227973
619505	ENSG00000199293	SNORA21	small nucleolar RNA, H/ACA box 21	1.73686	3.68302	9.97669	0.0038103	0.227973
29796	ENSG00000184076	UQCR10	ubiquinol-cytochrome c reductase, complex III subunit X	1.03911	9.17218	9.97661	0.00381042	0.227973
23341	ENSG00000116138	DNAJC16	DnaJ heat shock protein family (Hsp40) member C16	-1.34139	3.83895	9.97225	0.00381703	0.227973
5675	ENSG00000170848	PSG6	pregnancy specific beta-1-glycoprotein 6	-1.72089	11.6135	9.96923	0.00382162	0.227973
57414	ENSG00000005486	RHBDD2	rhomboid domain containing 2	-1.41672	4.73521	9.95326	0.00384599	0.228318
9326	ENSG00000273611	ZNHIT3	zinc finger HIT-type containing 3	0.987343	5.72008	9.95311	0.0038462	0.228318
55788	ENSG00000168216	LMBRD1	LMBR1 domain containing 1	-1.17901	7.03127	9.94953	0.00385169	0.228318
915	ENSG00000167286	CD3D	CD3 delta subunit of T-cell receptor complex	3.6139	1.71054	9.93552	0.00387323	0.228318
118987	ENSG00000165650	PDZD8	PDZ domain containing 8	-1.23732	4.44309	9.93395	0.00387566	0.228318
648740	NA	ACTG1P4	actin gamma 1 pseudogene 4	1.70487	3.20547	9.9296	0.00388238	0.228318
5142	ENSG00000184588	PDE4B	phosphodiesterase 4B	2.16258	3.50205	9.92874	0.0038837	0.228318
26275	ENSG00000198130	HIBCH	3-hydroxyisobutyryl-CoA hydrolase	-1.80423	2.96706	9.90319	0.00392345	0.230178
5678	ENSG00000183668	PSG9	pregnancy specific beta-1-glycoprotein 9	-1.87742	11.6731	9.88407	0.00395348	0.231009
518	ENSG00000154518	ATP5MC3	ATP synthase membrane subunit c locus 3	0.984034	8.93013	9.88382	0.00395387	0.231009
26133	ENSG00000100991	TRPC4AP	transient receptor potential cation channel subfamily C member 4 associated protein	-2.79429	2.88307	9.8772	0.00396433	0.231144
4634	ENSG00000160808	MYL3	myosin light chain 3	2.97272	1.98203	9.85896	0.0039933	0.232074
80195	ENSG00000133678	TMEM254	transmembrane protein 254	-1.10374	6.15432	9.85246	0.00400367	0.232074
262	ENSG00000123505	AMD1	adenosylmethionine decarboxylase 1	-1.05702	6.58516	9.84624	0.00401363	0.232074
56674	ENSG00000175348	TMEM9B	TMEM9 domain family member B	-1.02271	6.22235	9.84527	0.00401518	0.232074
148281	ENSG00000134207	SYT6	synaptotagmin 6	3.45578	0.831544	10.3419	0.00402932	0.232074
100506994	ENSG00000241472	PTPRG-AS1	PTPRG antisense RNA 1	3.45578	0.831544	10.3419	0.00402932	0.232074
1397	ENSG00000182809	CRIP2	cysteine rich protein 2	-1.6102	5.65965	9.8302	0.00403943	0.232185
83692	ENSG00000102181	CD99L2	CD99 molecule like 2	-1.0293	6.42002	9.8117	0.00406941	0.233203
284352	ENSG00000104866	PPP1R37	protein phosphatase 1 regulatory subunit 37	-1.77206	3.4842	9.80813	0.00407522	0.233203
401466	ENSG00000176731	RBIS	ribosomal biogenesis factor	0.991664	7.06558	9.80412	0.00408178	0.233203
64374	ENSG00000120725	SIL1	SIL1 nucleotide exchange factor	-1.44827	6.41286	9.7922	0.00410128	0.233275
6649	ENSG00000109610	SOD3	superoxide dismutase 3	-1.75261	3.59132	9.78942	0.00410585	0.233275
7812	ENSG00000009307	CSDE1	cold shock domain containing E1	-1.02867	7.50628	9.7883	0.00410768	0.233275
103504734	ENSG00000283475	MIR1244-4	microRNA 1244-4	-1.20764	4.74373	9.76874	0.00413997	0.234592
1666	ENSG00000104325	DECR1	2,4-dienoyl-CoA reductase 1	1.07205	6.6954	9.76279	0.00414986	0.234592
23643	ENSG00000154589	LY96	lymphocyte antigen 96	1.55335	8.15355	9.75757	0.00415855	0.234592
55049	ENSG00000006015	REX1BD	required for excision 1-B domain containing	-5.3594	1.981	10.045	0.00417828	0.234592
10016	ENSG00000249915	PDCD6	programmed cell death 6	-1.43159	4.64395	9.74486	0.00417977	0.234592
10544	ENSG00000101000	PROCR	protein C receptor	-1.38836	6.45334	9.74126	0.00418581	0.234592
521	ENSG00000169020	ATP5ME	ATP synthase membrane subunit e	1.01452	9.22735	9.73954	0.0041887	0.234592
827	ENSG00000077274	CAPN6	calpain 6	-1.60363	9.29528	9.72971	0.00420524	0.234909
164091	ENSG00000182749	PAQR7	progestin and adipoQ receptor family member 7	-1.33186	6.5119	9.72635	0.0042109	0.234909
1778	ENSG00000197102	DYNC1H1	dynein cytoplasmic 1 heavy chain 1	-0.99913	5.8667	9.69517	0.00426392	0.2374
23423	ENSG00000166557	TMED3	transmembrane p24 trafficking protein 3	-0.961622	5.51195	9.68211	0.00428633	0.2374
6503	ENSG00000155926	SLA	Src like adaptor	1.53137	3.48393	9.68078	0.00428863	0.2374
320	ENSG00000107282	APBA1	amyloid beta precursor protein binding family A member 1	1.63633	3.23355	9.68056	0.004289	0.2374
2124	ENSG00000185862	EVI2B	ecotropic viral integration site 2B	2.26046	2.28201	9.66729	0.00431193	0.238205
7755	ENSG00000122386	ZNF205	zinc finger protein 205	-4.2477	1.37923	9.94159	0.00434581	0.239611
6135	ENSG00000142676	RPL11	ribosomal protein L11	1.11874	10.5817	9.63816	0.00436271	0.240076
768211	ENSG00000181826	RELL1	RELT like 1	-1.21362	6.35569	9.62928	0.00437833	0.240182
6542	ENSG00000003989	SLC7A2	solute carrier family 7 member 2	-1.40968	6.92272	9.62745	0.00438156	0.240182
1508	ENSG00000164733	CTSB	cathepsin B	-0.960072	7.86451	9.62083	0.00439324	0.24028
1509	ENSG00000117984	CTSD	cathepsin D	-1.04523	6.03784	9.61686	0.00440026	0.24028
8729	ENSG00000107862	GBF1	golgi brefeldin A resistant guanine nucleotide exchange factor 1	-0.906796	6.58955	9.60716	0.00441748	0.240645
10809	ENSG00000214530	STARD10	StAR related lipid transfer domain containing 10	-2.96026	3.62127	9.60355	0.00442391	0.240645
10086	ENSG00000132297	HHLA1	HHLA1 neighbor of OC90	4.17918	0.912862	10.0385	0.00450408	0.242789
4494	ENSG00000198417	MT1F	metallothionein 1F	2.14819	2.63736	9.55809	0.00450571	0.242789
100506742	ENSG00000291983	CASP12	caspase 12 (gene/pseudogene)	4.03901	0.897313	10.0345	0.0045108	0.242789
84766	ENSG00000130038	CRACR2A	calcium release activated channel regulator 2A	4.03901	0.897313	10.0345	0.0045108	0.242789
100130890	ENSG00000279170	TSTD3	thiosulfate sulfurtransferase like domain containing 3	-4.74779	1.62883	9.84183	0.00451443	0.242789
1351	ENSG00000176340	COX8A	cytochrome c oxidase subunit 8A	-1.71572	6.50105	9.55319	0.00451461	0.242789
9695	ENSG00000134109	EDEM1	ER degradation enhancing alpha-mannosidase like protein 1	-1.2285	4.66018	9.54566	0.00452836	0.243067
1439	ENSG00000100368	CSF2RB	colony stimulating factor 2 receptor subunit beta	-1.02809	6.12323	9.53666	0.00454484	0.243476
8324	ENSG00000155760	FZD7	frizzled class receptor 7	-2.35079	2.47039	9.53215	0.00455312	0.243476
101927532	ENSG00000228058	LINC01736	long intergenic non-protein coding RNA 1736	3.99172	0.856896	9.98474	0.00459451	0.245228
4710	ENSG00000065518	NDUFB4	NADH:ubiquinone oxidoreductase subunit B4	0.848397	6.62494	9.50009	0.00461246	0.245259
116496	ENSG00000135842	NIBAN1	niban apoptosis regulator 1	1.85787	2.73589	9.49602	0.00462005	0.245259
101928020	NA	KANSL1L-AS1	KANSL1L antisense RNA 1	3.37896	0.788232	9.9692	0.00462101	0.245259
55207	ENSG00000134108	ARL8B	ADP ribosylation factor like GTPase 8B	-1.17716	5.66559	9.48957	0.0046321	0.245389
26090	ENSG00000100997	ABHD12	abhydrolase domain containing 12, lysophospholipase	-1.03896	5.54334	9.47195	0.00466523	0.246684
28974	ENSG00000104979	C19orf53	chromosome 19 open reading frame 53	0.922778	7.31247	9.46236	0.00468336	0.247182
10296	ENSG00000090316	MAEA	macrophage erythroblast attacher, E3 ubiquitin ligase	-2.09332	4.2302	9.4304	0.00474436	0.249648
118980	ENSG00000156398	SFXN2	sideroflexin 2	1.38692	3.66617	9.42868	0.00474767	0.249648
6144	ENSG00000122026	RPL21	ribosomal protein L21	-1.03719	7.62803	9.41844	0.00476741	0.25009
8763	ENSG00000135535	CD164	CD164 molecule	-1.09976	7.71194	9.4146	0.00477483	0.25009
116369	ENSG00000112053	SLC26A8	solute carrier family 26 member 8	3.89083	0.847958	9.87659	0.00478249	0.25009
117584	ENSG00000092871	RFFL	ring finger and FYVE like domain containing E3 ubiquitin protein ligase	3.23647	1.39463	9.40138	0.00480049	0.250306
11034	ENSG00000125868	DSTN	destrin, actin depolymerizing factor	-1.37686	7.72947	9.39729	0.00480845	0.250306
80146	ENSG00000115652	UXS1	UDP-glucuronate decarboxylase 1	-1.10876	4.45282	9.39493	0.00481306	0.250306
9097	ENSG00000101557	USP14	ubiquitin specific peptidase 14	-0.990129	4.78069	9.38721	0.00482817	0.250442
3078	ENSG00000244414	CFHR1	complement factor H related 1	3.62037	1.3911	9.38457	0.00483333	0.250442
79827	ENSG00000166250	CLMP	CXADR like membrane protein	2.03743	3.05432	9.37371	0.00485468	0.251091
10959	ENSG00000086598	TMED2	transmembrane p24 trafficking protein 2	-0.88399	6.19753	9.36451	0.00487285	0.251572
26994	ENSG00000123091	RNF11	ring finger protein 11	-1.02187	5.90629	9.35469	0.00489231	0.252118
25758	ENSG00000110427	KIAA1549L	KIAA1549 like	3.17114	1.29743	9.33745	0.00492669	0.252885
252983	ENSG00000166263	STXBP4	syntaxin binding protein 4	2.29166	2.78484	9.3345	0.00493261	0.252885
652995	ENSG00000214049	UCA1	urothelial cancer associated 1	-2.23914	4.26172	9.33321	0.0049352	0.252885
6836	ENSG00000148248	SURF4	surfeit 4	-0.946492	6.55231	9.32063	0.0049605	0.252885
644054	ENSG00000276430	FAM25C	family with sequence similarity 25 member C	-2.24148	2.71047	9.32006	0.00496166	0.252885
11211	ENSG00000111432	FZD10	frizzled class receptor 10	-1.54073	3.65938	9.3152	0.00497148	0.252885
94274	ENSG00000167641	PPP1R14A	protein phosphatase 1 regulatory inhibitor subunit 14A	-3.68663	3.3247	9.30894	0.00498415	0.252885
3827	ENSG00000113889	KNG1	kininogen 1	3.71606	1.1289	9.30698	0.00498812	0.252885
105376911	NA	NA	NA	3.19712	0.766361	9.76196	0.00499107	0.252885
307	ENSG00000196975	ANXA4	annexin A4	-1.48	8.51075	9.30108	0.0050001	0.252885
84545	ENSG00000055950	MRPL43	mitochondrial ribosomal protein L43	-1.29413	4.1212	9.29692	0.00500857	0.252885
100616345	ENSG00000283795	MIR4426	microRNA 4426	1.04392	10.3591	9.29423	0.00501407	0.252885
25859	ENSG00000152931	PART1	prostate androgen-regulated transcript 1	1.23701	4.13183	9.279	0.00504525	0.254007
23363	ENSG00000124006	OBSL1	obscurin like cytoskeletal adaptor 1	-1.42449	4.12592	9.2663	0.00507141	0.254793
80256	ENSG00000005238	ATOSB	atos homolog B	-1.33833	4.33137	9.26272	0.00507882	0.254793
2059	ENSG00000151491	EPS8	epidermal growth factor receptor pathway substrate 8	1.12483	4.9308	9.24045	0.00512512	0.25561
163115	ENSG00000290988	ZNF781	zinc finger protein 781	1.77228	2.91139	9.23742	0.00513147	0.25561
100506385	ENSG00000234380	LINC01426	long intergenic non-protein coding RNA 1426	3.51325	0.800681	9.68584	0.00513509	0.25561
100188993	NA	TRV-TAC1-1	tRNA-Val (anticodon TAC) 1-1	3.22745	0.76936	9.68323	0.00514012	0.25561
26777	ENSG00000225091	SNORA71A	small nucleolar RNA, H/ACA box 71A	3.22745	0.76936	9.68323	0.00514012	0.25561
5730	ENSG00000107317	PTGDS	prostaglandin D2 synthase	-2.01237	5.24994	9.22158	0.00516473	0.256386
5670	ENSG00000242221	PSG2	pregnancy specific beta-1-glycoprotein 2	-1.8723	12.6455	9.20454	0.00520077	0.257724
100873781	ENSG00000200840	RNU6-82P	RNA, U6 small nuclear 82, pseudogene	2.9221	1.26292	9.19269	0.005226	0.258523
84418	ENSG00000120306	CYSTM1	cysteine rich transmembrane module containing 1	0.937441	7.4821	9.18046	0.00525216	0.259366
4189	ENSG00000128590	DNAJB9	DnaJ heat shock protein family (Hsp40) member B9	-1.04192	6.1017	9.1659	0.00528352	0.260355
1051	ENSG00000172216	CEBPB	CCAAT enhancer binding protein beta	-1.07031	7.64776	9.16266	0.00529053	0.260355
10159	ENSG00000182220	ATP6AP2	ATPase H+ transporting accessory protein 2	-0.972933	5.61302	9.15668	0.00530349	0.260541
5671	ENSG00000221826	PSG3	pregnancy specific beta-1-glycoprotein 3	-1.88097	12.8442	9.14165	0.00533619	0.261694
10018	ENSG00000153094	BCL2L11	BCL2 like 11	-1.64798	3.27778	9.13476	0.00535126	0.261981
433	ENSG00000161944	ASGR2	asialoglycoprotein receptor 2	3.26142	0.772509	9.56895	0.00536529	0.262216
972	ENSG00000019582	CD74	CD74 molecule	1.48642	6.66044	9.1203	0.00538302	0.262539
9022	ENSG00000169583	CLIC3	chloride intracellular channel 3	-2.55223	4.45745	9.10441	0.00541818	0.262539
7134	ENSG00000114854	TNNC1	troponin C1, slow skeletal and cardiac type	1.58944	2.79575	9.09693	0.00543481	0.262539
2589	ENSG00000141429	GALNT1	polypeptide N-acetylgalactosaminyltransferase 1	-0.887503	6.63689	9.09559	0.00543778	0.262539
100129543	ENSG00000183850	ZNF730	zinc finger protein 730	2.23243	1.81768	9.09091	0.00544823	0.262539
7295	ENSG00000136810	TXN	thioredoxin	0.933961	7.64529	9.09056	0.00544901	0.262539
101927653	ENSG00000257259	LINC02388	long intergenic non-protein coding RNA 2388	3.25462	0.788848	9.52122	0.00546256	0.262539
105377132	NA	NA	NA	3.25462	0.788848	9.52122	0.00546256	0.262539
100874041	ENSG00000228598	MACC1-AS1	MACC1 antisense RNA 1	3.25462	0.788848	9.52122	0.00546256	0.262539
517	ENSG00000135390	ATP5MC2	ATP synthase membrane subunit c locus 2	0.941945	8.5221	9.08215	0.00546783	0.262539
7314	ENSG00000170315	UBB	ubiquitin B	0.924504	8.79045	9.07611	0.00548139	0.262539
140711	ENSG00000101342	TLDC2	TBC/LysM-associated domain containing 2	1.00555	5.20278	9.07382	0.00548654	0.262539
55276	ENSG00000169299	PGM2	phosphoglucomutase 2	-1.16504	5.43236	9.07135	0.0054921	0.262539
4283	ENSG00000138755	CXCL9	C-X-C motif chemokine ligand 9	3.46911	2.13039	9.05211	0.00553564	0.263447
11014	ENSG00000136240	KDELR2	KDEL endoplasmic reticulum protein retention receptor 2	-0.879177	7.04344	9.04894	0.00554283	0.263447
388335	ENSG00000187824	TMEM220	transmembrane protein 220	-4.94633	1.73728	9.30675	0.00555041	0.263447
54539	ENSG00000147123	NDUFB11	NADH:ubiquinone oxidoreductase subunit B11	-1.92866	5.0816	9.04215	0.00555831	0.263447
221458	ENSG00000164627	KIF6	kinesin family member 6	-2.37419	2.8379	9.03512	0.00557438	0.263447
2995	ENSG00000136732	GYPC	glycophorin C (Gerbich blood group)	1.28782	8.48376	9.03502	0.00557461	0.263447
580	ENSG00000138376	BARD1	BRCA1 associated RING domain 1	1.27512	3.97112	9.03336	0.00557841	0.263447
3113	ENSG00000231389	HLA-DPA1	major histocompatibility complex, class II, DP alpha 1	2.08292	4.33509	9.03035	0.00558532	0.263447
3283	ENSG00000203857	HSD3B1	hydroxy-delta-5-steroid dehydrogenase, 3 beta- and steroid delta-isomerase 1	-1.64824	9.33944	9.02113	0.00560651	0.264008
53831	ENSG00000139572	GPR84	G protein-coupled receptor 84	3.14671	1.53916	9.01662	0.00561692	0.26406
4495	ENSG00000125144	MT1G	metallothionein 1G	3.0576	2.70179	9.00706	0.00563903	0.264662
6060	ENSG00000207389	RNU1-4	RNA, U1 small nuclear 4	1.28846	3.90889	8.99628	0.00566408	0.265399
100134259	ENSG00000239332	LINC01119	long intergenic non-protein coding RNA 1119	-2.26935	2.46296	8.99156	0.00567509	0.265476
11321	ENSG00000198522	GPN1	GPN-loop GTPase 1	0.999466	5.07528	8.98746	0.00568467	0.265487
7629	ENSG00000065029	ZNF76	zinc finger protein 76	-1.27479	4.12612	8.97672	0.00570984	0.266147
5673	ENSG00000204941	PSG5	pregnancy specific beta-1-glycoprotein 5	-1.72987	12.3998	8.97345	0.00571754	0.266147
162963	ENSG00000167554	ZNF610	zinc finger protein 610	-3.35295	1.78741	8.96052	0.00574803	0.267128
85365	ENSG00000119523	ALG2	ALG2 alpha-1,3/1,6-mannosyltransferase	-1.49851	3.58433	8.9553	0.00576041	0.267197
677800	ENSG00000212464	SNORA12	small nucleolar RNA, H/ACA box 12	1.45559	4.50423	8.94627	0.00578188	0.267197
10894	ENSG00000133800	LYVE1	lymphatic vessel endothelial hyaluronan receptor 1	1.10113	6.26613	8.94492	0.0057851	0.267197
125050	ENSG00000202198	RN7SK	RNA component of 7SK nuclear ribonucleoprotein	1.08409	4.17533	8.94406	0.00578714	0.267197
3598	ENSG00000123496	IL13RA2	interleukin 13 receptor subunit alpha 2	-3.30689	2.92858	8.93666	0.00580483	0.267578
653492	NA	PSG10P	pregnancy specific beta-1-glycoprotein 10, pseudogene	-1.56178	11.4709	8.92937	0.00582229	0.267831
7035	ENSG00000003436	TFPI	tissue factor pathway inhibitor	-1.31244	10.3431	8.9265	0.00582918	0.267831
5576	ENSG00000114302	PRKAR2A	protein kinase cAMP-dependent type II regulatory subunit alpha	0.924909	5.10547	8.91333	0.00586093	0.268852
100506649	ENSG00000255857	PXN-AS1	PXN antisense RNA 1	3.32062	1.20225	8.90468	0.00588188	0.268852
1033	ENSG00000100526	CDKN3	cyclin dependent kinase inhibitor 3	1.37903	4.09135	8.90311	0.00588568	0.268852
84522	ENSG00000171135	JAGN1	jagunal homolog 1	-1.59794	3.71115	8.90164	0.00588926	0.268852
130951	ENSG00000159374	M1AP	meiosis 1 associated protein	3.07136	1.02319	8.88535	0.00592898	0.268921
8798	ENSG00000010219	DYRK4	dual specificity tyrosine phosphorylation regulated kinase 4	1.41661	3.7514	8.88226	0.00593656	0.268921
4317	ENSG00000118113	MMP8	matrix metallopeptidase 8	3.28871	0.953241	8.87504	0.00595428	0.268921
6993	ENSG00000146425	DYNLT1	dynein light chain Tctex-type 1	0.875911	7.13767	8.87404	0.00595675	0.268921
51372	ENSG00000232112	TMA7	translation machinery associated 7 homolog	0.911571	7.09563	8.87041	0.0059657	0.268921
22873	ENSG00000134874	DZIP1	DAZ interacting zinc finger protein 1	-3.52617	2.05805	8.8618	0.00598695	0.268921
100189307	NA	TRH-GTG1-3	tRNA-His (anticodon GTG) 1-3	2.90967	1.09806	8.85991	0.00599163	0.268921
3048	ENSG00000196565	HBG2	hemoglobin subunit gamma 2	2.2183	15.5871	8.85912	0.00599358	0.268921
4124	ENSG00000112893	MAN2A1	mannosidase alpha class 2A member 1	-1.15765	5.71202	8.8566	0.00599983	0.268921
26353	ENSG00000152137	HSPB8	heat shock protein family B (small) member 8	-1.08916	7.35767	8.85332	0.00600797	0.268921
388524	ENSG00000288920	RPSA2	ribosomal protein SA 2	0.906205	8.96175	8.85245	0.00601014	0.268921
2210	ENSG00000291135	FCGR1BP	Fc gamma receptor Ib, pseudogene	1.18347	4.76143	8.84035	0.00604026	0.268921
317	ENSG00000120868	APAF1	apoptotic peptidase activating factor 1	-4.44338	1.47177	9.09068	0.00604048	0.268921
23475	ENSG00000103485	QPRT	quinolinate phosphoribosyltransferase	-1.15093	4.02796	8.83928	0.00604294	0.268921
2358	ENSG00000171049	FPR2	formyl peptide receptor 2	2.4938	1.91615	8.83768	0.00604696	0.268921
102724428	ENSG00000275993	LOC102724428	salt inducible kinase 1B (putative)	-1.80401	2.84571	8.83574	0.00605179	0.268921
150094	ENSG00000142178	SIK1	salt inducible kinase 1	-1.80401	2.84571	8.83574	0.00605179	0.268921
6817	ENSG00000196502	SULT1A1	sulfotransferase family 1A member 1	1.45775	3.5137	8.82941	0.00606766	0.269205
1036	ENSG00000129596	CDO1	cysteine dioxygenase type 1	-1.10934	5.51089	8.82221	0.00608577	0.269377
3479	ENSG00000017427	IGF1	insulin like growth factor 1	1.00243	6.35932	8.82033	0.00609051	0.269377
170622	ENSG00000188243	COMMD6	COMM domain containing 6	0.881682	7.76138	8.80329	0.00613361	0.270045
7130	ENSG00000123610	TNFAIP6	TNF alpha induced protein 6	3.21222	2.67007	8.80189	0.00613718	0.270045
11342	ENSG00000082996	RNF13	ring finger protein 13	-1.018	6.22854	8.80132	0.00613863	0.270045
100507391	ENSG00000237222	LINC01968	long intergenic non-protein coding RNA 1968	3.0407	0.961515	8.79934	0.00614366	0.270045
138639	ENSG00000158079	PTPDC1	protein tyrosine phosphatase domain containing 1	2.91439	0.919513	8.79227	0.00616168	0.270419
6205	ENSG00000142534	RPS11	ribosomal protein S11	0.886872	8.08956	8.78672	0.00617588	0.270623
60684	ENSG00000168538	TRAPPC11	trafficking protein particle complex subunit 11	-1.44961	3.85572	8.77601	0.00620334	0.271408
10945	ENSG00000105438	KDELR1	KDEL endoplasmic reticulum protein retention receptor 1	-0.888371	7.539	8.76799	0.00622399	0.271893
154075	ENSG00000164483	SAMD3	sterile alpha motif domain containing 3	3.27385	0.977527	8.75762	0.00625083	0.272646
3047	ENSG00000213934	HBG1	hemoglobin subunit gamma 1	2.18068	15.4975	8.74912	0.0062729	0.273189
83941	ENSG00000162604	TM2D1	TM2 domain containing 1	-1.09101	6.00275	8.73903	0.00629923	0.273915
64092	ENSG00000155307	SAMSN1	SAM domain, SH3 domain and nuclear localization signals 1	2.10559	3.66866	8.73003	0.0063228	0.274384
390072	ENSG00000181074	OR52N4	olfactory receptor family 52 subfamily N member 4	3.19159	0.748689	9.12929	0.00633899	0.274384
101927157	NA	LOC101927157	uncharacterized LOC101927157	3.19159	0.748689	9.12929	0.00633899	0.274384
28957	ENSG00000147586	MRPS28	mitochondrial ribosomal protein S28	0.828922	6.21178	8.71862	0.00635282	0.274388
55839	ENSG00000166451	CENPN	centromere protein N	0.959813	5.64194	8.7165	0.00635842	0.274388
196993	ENSG00000225362	CT62	cancer/testis associated 62	3.19701	0.749135	9.11137	0.00638263	0.274598
79041	ENSG00000072954	TMEM38A	transmembrane protein 38A	3.19701	0.749135	9.11137	0.00638263	0.274598
152519	ENSG00000163293	NIPAL1	NIPA like domain containing 1	-1.15801	5.09629	8.70251	0.0063955	0.274736
55312	ENSG00000135002	RFK	riboflavin kinase	-1.15363	4.26968	8.69773	0.00640821	0.274816
57575	ENSG00000138650	PCDH10	protocadherin 10	1.28332	5.31199	8.69454	0.00641673	0.274816
4116	ENSG00000162385	MAGOH	mago homolog, exon junction complex subunit	0.901563	6.35288	8.67781	0.0064615	0.276257
64776	ENSG00000137720	CFAP68	cilia and flagella associated protein 68	1.29009	4.03566	8.67472	0.00646983	0.276257
660	ENSG00000102010	BMX	BMX non-receptor tyrosine kinase	-5.69349	2.17975	8.89763	0.00651871	0.277926
8309	ENSG00000168306	ACOX2	acyl-CoA oxidase 2	-5.15644	1.86072	8.88617	0.00654838	0.278756
2896	ENSG00000030582	GRN	granulin precursor	-1.16032	7.57657	8.64227	0.0065578	0.278756
28908	ENSG00000211598	IGKV4-1	immunoglobulin kappa variable 4-1	3.10264	0.976232	8.6286	0.00659527	0.279588
11315	ENSG00000116288	PARK7	Parkinsonism associated deglycase	0.881762	8.14962	8.62773	0.00659765	0.279588
18	ENSG00000183044	ABAT	4-aminobutyrate aminotransferase	-1.45616	3.94361	8.62436	0.00660693	0.279588
3956	ENSG00000100097	LGALS1	galectin 1	1.18301	8.56541	8.62021	0.00661835	0.279655
58527	ENSG00000146386	ABRACL	ABRA C-terminal like	1.07556	5.78638	8.61521	0.00663217	0.279822
6347	ENSG00000108691	CCL2	C-C motif chemokine ligand 2	2.02651	4.84243	8.60852	0.0066507	0.279831
5203	ENSG00000101132	PFDN4	prefoldin subunit 4	0.824756	5.76063	8.60371	0.00666404	0.279831
81607	ENSG00000143217	NECTIN4	nectin cell adhesion molecule 4	-1.24099	6.68783	8.60151	0.00667016	0.279831
55656	ENSG00000164941	INTS8	integrator complex subunit 8	2.15383	2.65726	8.60093	0.00667178	0.279831
10457	ENSG00000136235	GPNMB	glycoprotein nmb	-1.3671	7.78794	8.5947	0.00668914	0.280145
83541	ENSG00000125898	FAM110A	family with sequence similarity 110 member A	0.888515	7.89132	8.5733	0.00674917	0.280247
57126	ENSG00000204936	CD177	CD177 molecule	2.95574	1.44608	8.56992	0.0067587	0.280247
60676	ENSG00000116183	PAPPA2	pappalysin 2	-1.54367	10.1222	8.56796	0.00676424	0.280247
51411	ENSG00000110934	BIN2	bridging integrator 2	1.34182	5.22586	8.56565	0.00677076	0.280247
11200	ENSG00000183765	CHEK2	checkpoint kinase 2	1.23699	4.52251	8.5644	0.00677429	0.280247
4256	ENSG00000111341	MGP	matrix Gla protein	1.3713	7.55274	8.55887	0.00678996	0.280247
7037	ENSG00000072274	TFRC	transferrin receptor	-1.12777	8.34236	8.55628	0.0067973	0.280247
3552	ENSG00000115008	IL1A	interleukin 1 alpha	2.93147	1.69843	8.54215	0.00683758	0.280247
3822	ENSG00000205809	KLRC2	killer cell lectin like receptor C2	3.72842	0.83231	8.92835	0.00684776	0.280247
121601	ENSG00000151572	ANO4	anoctamin 4	3.72842	0.83231	8.92835	0.00684776	0.280247
55423	ENSG00000089012	SIRPG	signal regulatory protein gamma	3.72842	0.83231	8.92835	0.00684776	0.280247
941	ENSG00000121594	CD80	CD80 molecule	3.72842	0.83231	8.92835	0.00684776	0.280247
3111	ENSG00000204252	HLA-DOA	major histocompatibility complex, class II, DO alpha	3.72842	0.83231	8.92835	0.00684776	0.280247
7046	ENSG00000106799	TGFBR1	transforming growth factor beta receptor 1	-0.865841	5.67071	8.53727	0.00685154	0.280247
4661	ENSG00000196132	MYT1	myelin transcription factor 1	3.85413	0.844687	8.91652	0.00687909	0.280247
100506229	ENSG00000249173	LINC01093	long intergenic non-protein coding RNA 1093	3.85413	0.844687	8.91652	0.00687909	0.280247
136991	ENSG00000154438	ASZ1	ankyrin repeat, SAM and basic leucine zipper domain containing 1	3.85413	0.844687	8.91652	0.00687909	0.280247
100289462	ENSG00000177257	DEFB4B	defensin beta 4B	3.85413	0.844687	8.91652	0.00687909	0.280247
1673	ENSG00000171711	DEFB4A	defensin beta 4A	3.85413	0.844687	8.91652	0.00687909	0.280247
57722	ENSG00000103742	IGDCC4	immunoglobulin superfamily DCC subclass member 4	-1.5581	3.82527	8.51063	0.00692831	0.281847
28969	ENSG00000136261	BZW2	basic leucine zipper and W2 domains 2	-1.2048	8.37328	8.49925	0.0069614	0.282588
2793	ENSG00000167083	GNGT2	G protein subunit gamma transducin 2	2.37835	1.75275	8.49752	0.00696643	0.282588
101928767	ENSG00000258733	LINC02328	long intergenic non-protein coding RNA 2328	4.00275	0.857818	8.87044	0.00700265	0.283652
56287	ENSG00000169605	GKN1	gastrokine 1	-5.83174	2.28646	8.71225	0.00701731	0.283841
6171	ENSG00000229117	RPL41	ribosomal protein L41	1.09771	10.7122	8.46697	0.00705618	0.284519
51324	ENSG00000090487	SPG21	SPG21 abhydrolase domain containing, maspardin	-0.938357	5.4652	8.46618	0.00705851	0.284519
399664	ENSG00000181588	MEX3D	mex-3 RNA binding family member D	-1.05862	4.80248	8.46428	0.00706413	0.284519
11069	ENSG00000091428	RAPGEF4	Rap guanine nucleotide exchange factor 4	3.04381	1.68619	8.45115	0.00710312	0.285576
123207	ENSG00000169609	C15orf40	chromosome 15 open reading frame 40	-1.04745	4.65187	8.44868	0.00711048	0.285576
6814	ENSG00000116266	STXBP3	syntaxin binding protein 3	-1.21605	5.75447	8.44245	0.0071291	0.285919
6362	ENSG00000275385	CCL18	C-C motif chemokine ligand 18	3.19883	1.44911	8.43444	0.00715309	0.286398
100505881	ENSG00000234456	MAGI2-AS3	MAGI2 antisense RNA 3	-4.46182	1.46272	8.65816	0.00717058	0.286398
51649	ENSG00000181610	MRPS23	mitochondrial ribosomal protein S23	0.998173	5.67097	8.42838	0.0071713	0.286398
51669	ENSG00000133872	SARAF	store-operated calcium entry associated regulatory factor	-0.870547	6.61852	8.40714	0.00723557	0.288559
81892	ENSG00000119705	SLIRP	SRA stem-loop interacting RNA binding protein	0.9555	9.15781	8.40179	0.00725184	0.288802
26521	ENSG00000150779	TIMM8B	translocase of inner mitochondrial membrane 8 homolog B	1.00323	4.86431	8.38378	0.00730696	0.289762
28984	ENSG00000102760	RGCC	regulator of cell cycle	-1.10028	5.83855	8.38336	0.00730824	0.289762
6545	ENSG00000099960	SLC7A4	solute carrier family 7 member 4	-1.47977	4.71457	8.38265	0.00731042	0.289762
25932	ENSG00000169504	CLIC4	chloride intracellular channel 4	-0.950855	6.96981	8.38059	0.00731676	0.289762
100132417	ENSG00000265531	FCGR1CP	Fc gamma receptor Ic, pseudogene	1.20017	4.67355	8.37599	0.00733093	0.289919
3297	ENSG00000185122	HSF1	heat shock transcription factor 1	-5.41008	2.01513	8.5991	0.00734216	0.289959
284942	ENSG00000291064	RPL23AP82	ribosomal protein L23a pseudogene 82	1.16323	3.92349	8.3668	0.00735932	0.290233
442454	NA	UQCRBP1	ubiquinol-cytochrome c reductase binding protein pseudogene 1	0.955669	8.25878	8.36174	0.00737502	0.290449
2947	ENSG00000134202	GSTM3	glutathione S-transferase mu 3	1.43468	4.78743	8.35769	0.00738758	0.29054
100507290	ENSG00000261221	ZNF865	zinc finger protein 865	-3.94963	1.25236	8.57888	0.00740194	0.290703
6990	ENSG00000165169	DYNLT3	dynein light chain Tctex-type 3	-1.02697	4.58967	8.33447	0.00746016	0.292585
64219	ENSG00000181191	PJA1	praja ring finger ubiquitin ligase 1	-1.20372	4.24035	8.29417	0.00758798	0.296878
23065	ENSG00000127463	EMC1	ER membrane protein complex subunit 1	-1.02123	5.47119	8.29337	0.00759054	0.296878
100129345	ENSG00000197176	LINC02291	long intergenic non-protein coding RNA 2291	-1.86684	4.21414	8.2794	0.00763542	0.297717
5641	ENSG00000100600	LGMN	legumain	-0.904031	7.24477	8.27404	0.00765273	0.297717
7846	ENSG00000167552	TUBA1A	tubulin alpha 1a	1.08183	8.66851	8.27234	0.00765821	0.297717
54503	ENSG00000177054	ZDHHC13	zinc finger DHHC-type palmitoyltransferase 13	-1.79726	3.32886	8.27198	0.00765937	0.297717
25966	ENSG00000157617	C2CD2	C2 calcium dependent domain containing 2	-1.43739	3.35664	8.27042	0.00766441	0.297717
101928304	ENSG00000232310	LINC03002	long intergenic non-protein coding RNA 3002	3.10718	1.46616	8.25961	0.00769949	0.298346
51192	ENSG00000217555	CKLF	chemokine like factor	1.07966	5.16689	8.25652	0.00770956	0.298346
6696	ENSG00000118785	SPP1	secreted phosphoprotein 1	1.54708	10.4757	8.25534	0.00771339	0.298346
4738	ENSG00000129559	NEDD8	NEDD8 ubiquitin like modifier	0.810946	7.03988	8.25251	0.00772263	0.298346
28755	ENSG00000277734	TRAC	T cell receptor alpha constant	3.19623	1.75733	8.24496	0.0077473	0.298892
100462977	NA	MTRNR2L1	MT-RNR2 like 1 (pseudogene)	0.829065	6.92523	8.22858	0.00780113	0.30056
10013	ENSG00000094631	HDAC6	histone deacetylase 6	-1.18988	3.83307	8.19132	0.0079251	0.30225
3959	ENSG00000108679	LGALS3BP	galectin 3 binding protein	-1.00865	4.628	8.18904	0.00793276	0.30225
3094	ENSG00000169567	HINT1	histidine triad nucleotide binding protein 1	0.84432	8.69563	8.18898	0.00793297	0.30225
102724515	ENSG00000204792	LINC01291	long intergenic non-protein coding RNA 1291	3.01423	0.744605	8.54796	0.00793924	0.30225
7433	ENSG00000114812	VIPR1	vasoactive intestinal peptide receptor 1	3.01423	0.744605	8.54796	0.00793924	0.30225
23480	ENSG00000132432	SEC61G	SEC61 translocon subunit gamma	0.956805	8.44417	8.18704	0.00793949	0.30225
2209	ENSG00000150337	FCGR1A	Fc gamma receptor Ia	1.18457	4.68655	8.18544	0.00794488	0.30225
219749	ENSG00000175395	ZNF25	zinc finger protein 25	-3.95944	1.25509	8.39885	0.00795834	0.30225
29950	ENSG00000197019	SERTAD1	SERTA domain containing 1	-1.33555	3.73275	8.17677	0.00797411	0.30225
10076	ENSG00000060656	PTPRU	protein tyrosine phosphatase receptor type U	-1.31947	3.71028	8.1753	0.00797908	0.30225
1512	ENSG00000103811	CTSH	cathepsin H	-1.69733	3.99646	8.17519	0.00797943	0.30225
23446	ENSG00000070214	SLC44A1	solute carrier family 44 member 1	-0.894109	7.09046	8.17065	0.0079948	0.30225
91624	ENSG00000162614	NEXN	nexilin F-actin binding protein	1.27657	5.16379	8.17025	0.00799616	0.30225
2067	ENSG00000012061	ERCC1	ERCC excision repair 1, endonuclease non-catalytic subunit	-1.42661	4.20257	8.16868	0.00800147	0.30225
5814	ENSG00000146676	PURB	purine rich element binding protein B	-0.92075	4.83262	8.16775	0.00800465	0.30225
100287227	NA	TIPARP-AS1	TIPARP antisense RNA 1	2.82627	0.925028	8.15923	0.00803361	0.302941
412	ENSG00000101846	STS	steroid sulfatase	-1.17979	7.62718	8.11681	0.00817951	0.307643
4496	ENSG00000205358	MT1H	metallothionein 1H	3.14212	1.34164	8.11668	0.00817996	0.307643
9535	ENSG00000130755	GMFG	glia maturation factor gamma	1.04321	7.26363	8.10382	0.00822476	0.308918
29089	ENSG00000077152	UBE2T	ubiquitin conjugating enzyme E2 T	1.16922	5.32204	8.09503	0.00825554	0.309628
11343	ENSG00000074416	MGLL	monoglyceride lipase	-1.11327	5.7563	8.08819	0.00827959	0.309628
28959	ENSG00000106565	TMEM176B	transmembrane protein 176B	1.0642	6.54665	8.08617	0.00828669	0.309628
440600	ENSG00000227963	RBM15-AS1	RBM15 antisense RNA 1	2.91496	0.919789	8.07939	0.00831062	0.309628
2934	ENSG00000148180	GSN	gelsolin	-0.922322	5.97055	8.07326	0.00833232	0.309628
57153	ENSG00000129353	SLC44A2	solute carrier family 44 member 2	-0.918015	6.84348	8.07292	0.00833351	0.309628
146722	ENSG00000186074	CD300LF	CD300 molecule like family member f	3.36456	0.768258	8.42133	0.00834428	0.309628
7780	ENSG00000158014	SLC30A2	solute carrier family 30 member 2	-1.27728	4.51053	8.06806	0.00835077	0.309628
2013	ENSG00000213853	EMP2	epithelial membrane protein 2	-1.27178	7.36045	8.06591	0.0083584	0.309628
8976	ENSG00000106299	WASL	WASP like actin nucleation promoting factor	-0.928882	5.8973	8.06567	0.00835927	0.309628
9506	ENSG00000101951	PAGE4	PAGE family member 4	1.29016	13.1857	8.06198	0.00837241	0.309628
51503	ENSG00000150316	CWC15	CWC15 spliceosome associated protein homolog	0.78238	7.43984	8.05905	0.00838286	0.309628
154467	ENSG00000198937	CCDC167	coiled-coil domain containing 167	1.0301	5.82331	8.05706	0.00838994	0.309628
6764	ENSG00000166444	DENND2B	DENN domain containing 2B	-1.47322	4.05332	8.05527	0.00839632	0.309628
23589	ENSG00000153048	CARHSP1	calcium regulated heat stable protein 1	-1.43414	5.8919	8.05188	0.00840848	0.309674
148932	ENSG00000142961	MOB3C	MOB kinase activator 3C	-1.60773	4.02735	8.04481	0.0084338	0.310204
54534	ENSG00000136897	MRPL50	mitochondrial ribosomal protein L50	1.05297	4.3925	8.02622	0.00850087	0.312267
101928656	ENSG00000251504	LINC01099	long intergenic non-protein coding RNA 1099	-4.252	1.37508	8.23296	0.00851194	0.312269
11320	ENSG00000071073	MGAT4A	alpha-1,3-mannosyl-glycoprotein 4-beta-N-acetylglucosaminyltransferase A	-1.42698	3.9685	8.0135	0.00854708	0.313154
388588	ENSG00000235169	SMIM1	small integral membrane protein 1 (Vel blood group)	-4.60538	1.54851	8.20922	0.00859459	0.314489
5437	ENSG00000163882	POLR2H	RNA polymerase II, I and III subunit H	0.83305	6.3762	7.99207	0.00862556	0.314822
26974	ENSG00000267508	ZNF285	zinc finger protein 285	3.1255	0.742903	8.33254	0.00864189	0.314822
148867	ENSG00000162695	SLC30A7	solute carrier family 30 member 7	-1.00583	5.54736	7.9876	0.00864199	0.314822
57470	ENSG00000130764	LRRC47	leucine rich repeat containing 47	-1.02445	4.35314	7.98597	0.00864804	0.314822
146956	ENSG00000154920	EME1	essential meiotic structure-specific endonuclease 1	2.91714	0.720739	8.31759	0.00869314	0.315654
100505920	NA	LINC02036	long intergenic non-protein coding RNA 2036	2.91714	0.720739	8.31759	0.00869314	0.315654
345930	ENSG00000203734	ECT2L	epithelial cell transforming 2 like	2.84129	0.916333	7.96927	0.00870989	0.315859
7162	ENSG00000146242	TPBG	trophoblast glycoprotein	-1.21477	3.90036	7.95365	0.0087682	0.317182
968	ENSG00000129226	CD68	CD68 molecule	1.06195	5.41398	7.94728	0.00879211	0.317182
7991	ENSG00000104723	TUSC3	tumor suppressor candidate 3	-1.23595	8.39346	7.94406	0.00880422	0.317182
5021	ENSG00000180914	OXTR	oxytocin receptor	3.51373	0.780902	8.28457	0.00880756	0.317182
55845	ENSG00000254999	BRK1	BRICK1 subunit of SCAR/WAVE actin nucleating complex	0.873111	7.80006	7.94246	0.00881023	0.317182
858	ENSG00000105971	CAV2	caveolin 2	-0.99853	5.35083	7.94162	0.0088134	0.317182
1652	ENSG00000099977	DDT	D-dopachrome tautomerase	-2.97372	3.26901	7.9371	0.00883044	0.317393
5638	ENSG00000130962	PRRG1	proline rich and Gla domain 1	-1.23816	4.18877	7.93304	0.00884579	0.317542
522	ENSG00000154723	ATP5PF	ATP synthase peripheral stalk subunit F6	0.883084	8.9405	7.92883	0.00886174	0.317713
10873	ENSG00000151376	ME3	malic enzyme 3	2.92783	1.19914	7.92493	0.00887654	0.317843
256471	ENSG00000164073	MFSD8	major facilitator superfamily domain containing 8	-1.36192	3.98919	7.92196	0.00888782	0.317846
100506119	ENSG00000233901	LINC01503	long intergenic non-protein coding RNA 1503	1.42171	3.56131	7.91747	0.00890489	0.318056
1340	ENSG00000126267	COX6B1	cytochrome c oxidase subunit 6B1	0.925203	9.64381	7.90524	0.00895163	0.318997
57633	ENSG00000175928	LRRN1	leucine rich repeat neuronal 1	2.94971	0.723751	8.24308	0.00895371	0.318997
84896	ENSG00000138138	ATAD1	ATPase family AAA domain containing 1	-0.967568	5.93526	7.87976	0.00904984	0.322018
137835	ENSG00000165071	TMEM71	transmembrane protein 71	3.22805	1.30888	7.85756	0.0091364	0.324691
51678	ENSG00000105926	PALS2	protein associated with LIN7 2, MAGUK p55 family member	1.38179	2.89934	7.85203	0.00915808	0.324967
6565	ENSG00000163406	SLC15A2	solute carrier family 15 member 2	2.45352	1.97101	7.84817	0.00917324	0.324967
9976	ENSG00000110852	CLEC2B	C-type lectin domain family 2 member B	1.38993	5.77042	7.84482	0.00918645	0.324967
79921	ENSG00000133142	TCEAL4	transcription elongation factor A like 4	0.936978	7.57595	7.8412	0.00920074	0.324967
3127	ENSG00000198502	HLA-DRB5	major histocompatibility complex, class II, DR beta 5	2.14973	2.69378	7.84074	0.00920256	0.324967
728	ENSG00000197405	C5AR1	complement C5a receptor 1	1.8151	2.66187	7.83814	0.00921284	0.324967
25953	ENSG00000127838	PNKD	PNKD metallo-beta-lactamase domain containing	0.941314	6.55168	7.83385	0.00922979	0.325053
55851	ENSG00000205155	PSENEN	presenilin enhancer, gamma-secretase subunit	0.88513	5.50488	7.83013	0.00924454	0.325053
3149	ENSG00000029993	HMGB3	high mobility group box 3	-0.891575	7.47	7.82861	0.00925058	0.325053
57410	ENSG00000142186	SCYL1	SCY1 like pseudokinase 1	-3.3604	1.82199	7.82597	0.00926106	0.325053
7133	ENSG00000028137	TNFRSF1B	TNF receptor superfamily member 1B	0.873475	4.83093	7.82028	0.00928374	0.325242
404672	ENSG00000272047	GTF2H5	general transcription factor IIH subunit 5	0.845543	6.26792	7.8156	0.0093024	0.325242
3957	ENSG00000100079	LGALS2	galectin 2	3.22365	1.32806	7.81428	0.00930769	0.325242
11091	ENSG00000196363	WDR5	WD repeat domain 5	-1.42271	4.40102	7.81314	0.00931226	0.325242
5778	ENSG00000143851	PTPN7	protein tyrosine phosphatase non-receptor type 7	2.98563	0.726906	8.13605	0.00934323	0.325523
440503	ENSG00000214456	PLIN5	perilipin 5	2.98563	0.726906	8.13605	0.00934323	0.325523
5693	ENSG00000100804	PSMB5	proteasome 20S subunit beta 5	0.817662	7.68853	7.79483	0.00938579	0.325594
375790	ENSG00000188157	AGRN	agrin	-1.21973	4.74053	7.79062	0.0094028	0.325594
3270	ENSG00000130528	HRC	histidine rich calcium binding protein	3.25943	0.754498	8.11965	0.00940455	0.325594
51233	ENSG00000189269	DRICH1	aspartate rich 1	3.25943	0.754498	8.11965	0.00940455	0.325594
5118	ENSG00000106333	PCOLCE	procollagen C-endopeptidase enhancer	1.74466	3.71771	7.78955	0.00940715	0.325594
3512	ENSG00000132465	JCHAIN	joining chain of multimeric IgA and IgM	3.18582	0.946366	7.78719	0.00941668	0.325594
2878	ENSG00000211445	GPX3	glutathione peroxidase 3	-1.60345	7.00108	7.78291	0.00943404	0.325594
399	ENSG00000168421	RHOH	ras homolog family member H	3.03225	1.83759	7.78218	0.00943701	0.325594
26863	ENSG00000206737	RNVU1-18	RNA, variant U1 small nuclear 18	1.23949	4.00009	7.76978	0.00948746	0.326937
150372	ENSG00000235568	NFAM1	NFAT activating protein with ITAM motif 1	2.80014	1.0824	7.75832	0.00953438	0.327667
3937	ENSG00000043462	LCP2	lymphocyte cytosolic protein 2	1.8005	2.89876	7.75599	0.00954398	0.327667
79056	ENSG00000135378	PRRG4	proline rich and Gla domain 4	-0.894946	5.39459	7.75386	0.00955272	0.327667
23710	ENSG00000139112	GABARAPL1	GABA type A receptor associated protein like 1	-0.857182	7.32282	7.75335	0.0095548	0.327667
728758	NA	PIN4P1	peptidylprolyl cis/trans isomerase, NIMA-interacting 4 pseudogene 1	0.937091	6.02764	7.73894	0.00961429	0.32931
9641	ENSG00000263528	IKBKE	inhibitor of nuclear factor kappa B kinase subunit epsilon	-4.44024	1.46282	7.92599	0.00965163	0.329963
3925	ENSG00000117632	STMN1	stathmin 1	0.797904	6.89064	7.72744	0.00966205	0.329963
91442	ENSG00000131944	FAAP24	FA core complex associated protein 24	2.14769	1.98278	7.72596	0.00966823	0.329963
966	ENSG00000085063	CD59	CD59 molecule (CD59 blood group)	-1.12997	10.4718	7.71999	0.00969313	0.330177
25915	ENSG00000178057	NDUFAF3	NADH:ubiquinone oxidoreductase complex assembly factor 3	-1.34208	3.79418	7.71889	0.00969775	0.330177
800	ENSG00000122786	CALD1	caldesmon 1	0.858324	9.09505	7.71463	0.00971558	0.330388
22900	ENSG00000105483	CARD8	caspase recruitment domain family member 8	1.09414	4.265	7.70557	0.00975362	0.331285
102659353	ENSG00000280634	THRIL	TNF and HNRNPL related immunoregulatory long non-coding RNA	1.64548	2.496	7.69654	0.00979166	0.332179
653162	NA	RPSAP9	ribosomal protein SA pseudogene 9	0.805999	7.03643	7.68941	0.00982187	0.332692
10289	ENSG00000114784	EIF1B	eukaryotic translation initiation factor 1B	0.775778	5.72461	7.68744	0.0098302	0.332692
101927931	ENSG00000270164	LINC01480	long intergenic non-protein coding RNA 1480	-4.07259	1.29819	7.87847	0.0098426	0.332692
5920	ENSG00000133321	PLAAT4	phospholipase A and acyltransferase 4	1.31386	5.04437	7.67993	0.00986213	0.332692
84680	ENSG00000110455	ACCS	1-aminocyclopropane-1-carboxylate synthase homolog (inactive)	-4.88902	1.69394	7.87288	0.00986534	0.332692
3815	ENSG00000157404	KIT	KIT proto-oncogene, receptor tyrosine kinase	-4.59644	1.53004	7.86449	0.00989955	0.332835
3491	ENSG00000142871	CCN1	cellular communication network factor 1	1.42355	5.49894	7.66608	0.00992133	0.332835
10476	ENSG00000167863	ATP5PD	ATP synthase peripheral stalk subunit d	0.741663	6.14632	7.66466	0.00992741	0.332835
55347	ENSG00000144827	ABHD10	abhydrolase domain containing 10, depalmitoylase	1.35053	4.7799	7.66438	0.00992862	0.332835
2132	ENSG00000151348	EXT2	exostosin glycosyltransferase 2	-1.0161	5.66209	7.66193	0.00993914	0.332835
55863	ENSG00000171204	TMEM126B	transmembrane protein 126B	0.937042	5.5745	7.66005	0.00994721	0.332835
57515	ENSG00000111897	SERINC1	serine incorporator 1	-0.922318	7.04562	7.6579	0.00995645	0.332835
116540	ENSG00000204822	MRPL53	mitochondrial ribosomal protein L53	-1.5937	4.05616	7.65629	0.00996337	0.332835
84916	ENSG00000141076	UTP4	UTP4 small subunit processome component	-1.2743	3.95474	7.65268	0.00997892	0.332963
401232	ENSG00000244041	LINC01011	long intergenic non-protein coding RNA 1011	2.64715	1.28358	7.64495	0.0100123	0.333388
1612	ENSG00000196730	DAPK1	death associated protein kinase 1	-0.934133	6.15645	7.64167	0.0100265	0.333388
27106	ENSG00000105643	ARRDC2	arrestin domain containing 2	-2.71883	1.85842	7.64159	0.0100269	0.333388
57134	ENSG00000117643	MAN1C1	mannosidase alpha class 1C member 1	-1.0886	7.55549	7.63422	0.0100589	0.334062
670	ENSG00000137274	BPHL	biphenyl hydrolase like	-2.63022	2.223	7.63014	0.0100767	0.334261
8140	ENSG00000103257	SLC7A5	solute carrier family 7 member 5	-1.09359	6.47526	7.62689	0.0100908	0.334289
6744	ENSG00000138434	ITPRID2	ITPR interacting domain containing 2	-0.895709	6.5185	7.62438	0.0101018	0.334289
8038	ENSG00000148848	ADAM12	ADAM metallopeptidase domain 12	-1.32687	11.2007	7.62186	0.0101128	0.334289
767	ENSG00000178538	CA8	carbonic anhydrase 8	1.03194	4.70215	7.61206	0.0101558	0.335017
79590	ENSG00000143314	MRPL24	mitochondrial ribosomal protein L24	0.930746	5.08073	7.61043	0.010163	0.335017
100507650	ENSG00000215277	RNF212B	ring finger protein 212B	2.8108	1.09964	7.60878	0.0101703	0.335017
9463	ENSG00000100151	PICK1	protein interacting with PRKCA 1	1.83497	2.3228	7.59801	0.0102178	0.33586
4651	ENSG00000145555	MYO10	myosin X	0.885227	5.47906	7.59762	0.0102195	0.33586
28971	ENSG00000087884	AAMDC	adipogenesis associated Mth938 domain containing	0.926671	5.58957	7.59285	0.0102407	0.336167
100996485	ENSG00000224186	PITX1-AS1	PITX1 antisense RNA 1	2.7074	1.06477	7.57622	0.0103148	0.338208
90701	ENSG00000166562	SEC11C	SEC11 homolog C, signal peptidase complex subunit	-1.41967	5.17951	7.56936	0.0103455	0.338346
9991	ENSG00000119314	PTBP3	polypyrimidine tract binding protein 3	-0.929373	4.85723	7.56396	0.0103697	0.338346
83464	ENSG00000138613	APH1B	aph-1 homolog B, gamma-secretase subunit	1.08509	4.61462	7.56099	0.0103831	0.338346
100170221	NA	SNAR-H	small NF90 (ILF3) associated RNA H	-5.50944	2.07133	7.74296	0.0104104	0.338346
4211	ENSG00000143995	MEIS1	Meis homeobox 1	1.11718	5.57289	7.55246	0.0104216	0.338346
79983	ENSG00000124429	POF1B	POF1B actin binding protein	-2.48338	2.22367	7.55222	0.0104227	0.338346
1347	ENSG00000112695	COX7A2	cytochrome c oxidase subunit 7A2	0.817687	8.10523	7.55073	0.0104295	0.338346
1080	ENSG00000001626	CFTR	CF transmembrane conductance regulator	3.44988	0.969597	7.54818	0.010441	0.338346
143689	ENSG00000134627	PIWIL4	piwi like RNA-mediated gene silencing 4	2.43572	2.07116	7.5463	0.0104495	0.338346
9048	ENSG00000117407	ARTN	artemin	-2.86084	2.09963	7.54377	0.010461	0.338346
54557	ENSG00000197860	SGTB	small glutamine rich tetratricopeptide repeat co-chaperone beta	2.02363	1.93014	7.54354	0.0104621	0.338346
66000	ENSG00000144868	TMEM108	transmembrane protein 108	-1.62884	3.37054	7.53773	0.0104885	0.338346
25800	ENSG00000141424	SLC39A6	solute carrier family 39 member 6	-1.04472	6.16175	7.53717	0.010491	0.338346
9709	ENSG00000051108	HERPUD1	homocysteine inducible ER protein with ubiquitin like domain 1	-0.966945	5.97477	7.53408	0.0105051	0.338346
5058	ENSG00000149269	PAK1	p21 (RAC1) activated kinase 1	-0.906748	6.2636	7.5327	0.0105114	0.338346
27245	ENSG00000126705	AHDC1	AT-hook DNA binding motif containing 1	-1.95717	2.52774	7.53117	0.0105184	0.338346
84792	ENSG00000178397	FAM220A	family with sequence similarity 220 member A	-1.44395	3.6963	7.53047	0.0105216	0.338346
384	ENSG00000081181	ARG2	arginase 2	1.07053	4.86881	7.52784	0.0105336	0.338351
100189032	NA	TRL-TAG3-1	tRNA-Leu (anticodon TAG) 3-1	2.71435	0.89275	7.52267	0.0105573	0.338728
6402	ENSG00000188404	SELL	selectin L	1.77964	2.74044	7.51238	0.0106046	0.339863
9445	ENSG00000136156	ITM2B	integral membrane protein 2B	-0.822438	8.85818	7.50859	0.0106221	0.340039
83660	ENSG00000171914	TLN2	talin 2	-2.50432	1.86558	7.50028	0.0106606	0.340886
267	ENSG00000159461	AMFR	autocrine motility factor receptor	-0.979721	6.00373	7.49363	0.0106914	0.341467
27255	ENSG00000134115	CNTN6	contactin 6	3.40298	1.30463	7.49119	0.0107028	0.341467
4259	ENSG00000143198	MGST3	microsomal glutathione S-transferase 3	1.00538	10.7734	7.47992	0.0107554	0.34276
148534	ENSG00000152078	TLCD4	TLC domain containing 4	-2.79197	1.50116	7.47433	0.0107816	0.34321
11164	ENSG00000165609	NUDT5	nudix hydrolase 5	1.11895	4.3868	7.46799	0.0108114	0.343772
22931	ENSG00000099246	RAB18	RAB18, member RAS oncogene family	-0.824456	5.96492	7.46039	0.0108472	0.344527
286319	ENSG00000198680	TUSC1	tumor suppressor candidate 1	-1.53448	3.08204	7.44836	0.0109042	0.345732
90522	ENSG00000167645	YIF1B	Yip1 interacting factor homolog B, membrane trafficking protein	-2.95063	2.4303	7.44724	0.0109095	0.345732
9686	ENSG00000144560	VGLL4	vestigial like family member 4	1.17221	4.12705	7.44328	0.0109284	0.345943
93974	ENSG00000130770	ATP5IF1	ATP synthase inhibitory factor subunit 1	-1.22709	5.73865	7.43356	0.0109748	0.346706
8412	ENSG00000137936	BCAR3	BCAR3 adaptor protein, NSP family member	-1.13394	5.5312	7.43312	0.0109769	0.346706
8237	ENSG00000102226	USP11	ubiquitin specific peptidase 11	-2.12103	2.5542	7.43052	0.0109893	0.346714
1520	ENSG00000163131	CTSS	cathepsin S	0.97984	6.64207	7.42432	0.0110191	0.346826
222	ENSG00000132746	ALDH3B2	aldehyde dehydrogenase 3 family member B2	-1.42249	3.47969	7.42229	0.0110289	0.346826
2171	ENSG00000164687	FABP5	fatty acid binding protein 5	-1.36407	3.89242	7.42085	0.0110358	0.346826
51660	ENSG00000060762	MPC1	mitochondrial pyruvate carrier 1	0.999639	4.17251	7.41961	0.0110417	0.346826
8028	ENSG00000078403	MLLT10	MLLT10 histone lysine methyltransferase DOT1L cofactor	0.850997	5.74721	7.41079	0.0110844	0.347779
5510	ENSG00000115685	PPP1R7	protein phosphatase 1 regulatory subunit 7	0.850501	6.8709	7.40647	0.0111052	0.347838
2519	ENSG00000001036	FUCA2	alpha-L-fucosidase 2	-0.789866	5.54125	7.40534	0.0111107	0.347838
57128	ENSG00000214113	LYRM4	LYR motif containing 4	0.889691	5.16451	7.39114	0.0111798	0.349616
6051	ENSG00000176393	RNPEP	arginyl aminopeptidase	-1.00479	4.48734	7.38675	0.0112013	0.349902
8626	ENSG00000073282	TP63	tumor protein p63	1.27035	3.57094	7.37941	0.0112373	0.35064
348801	ENSG00000206535	LNP1	leukemia NUP98 fusion partner 1	-4.30456	1.40655	7.55657	0.0112514	0.350694
2487	ENSG00000162998	FRZB	frizzled related protein	-1.26172	7.48799	7.36935	0.0112868	0.351152
78988	ENSG00000173141	MRPL57	mitochondrial ribosomal protein L57	-1.43762	4.01793	7.36749	0.011296	0.351152
6194	ENSG00000137154	RPS6	ribosomal protein S6	0.916005	10.3709	7.36564	0.0113051	0.351152
7123	ENSG00000163815	CLEC3B	C-type lectin domain family 3 member B	-2.79335	3.2008	7.36353	0.0113155	0.351152
7040	ENSG00000105329	TGFB1	transforming growth factor beta 1	-1.49695	3.64487	7.35562	0.0113547	0.351984
7190	ENSG00000259706	HSP90B2P	heat shock protein 90 beta family member 2, pseudogene	-0.953611	8.00429	7.34779	0.0113937	0.352807
5694	ENSG00000142507	PSMB6	proteasome 20S subunit beta 6	0.814853	8.31461	7.34368	0.0114142	0.353057
284992	ENSG00000144395	CCDC150	coiled-coil domain containing 150	2.79013	1.27147	7.33551	0.0114551	0.353258
256987	ENSG00000164300	SERINC5	serine incorporator 5	-1.07388	6.26509	7.33496	0.0114579	0.353258
5047	ENSG00000122133	PAEP	progestagen associated endometrial protein	3.34724	1.32811	7.33383	0.0114635	0.353258
51018	ENSG00000067533	RRP15	ribosomal RNA processing 15 homolog	0.907535	5.93333	7.32501	0.0115079	0.353258
56005	ENSG00000074842	MYDGF	myeloid derived growth factor	-0.854528	6.60652	7.32266	0.0115197	0.353258
100861548	ENSG00000117242	PINK1-AS	PINK1 antisense RNA	-3.62794	1.12462	7.49714	0.011535	0.353258
126969	ENSG00000143036	SLC44A3	solute carrier family 44 member 3	1.46631	3.61745	7.31847	0.0115409	0.353258
51082	ENSG00000186184	POLR1D	RNA polymerase I and III subunit D	0.765406	5.93804	7.31801	0.0115432	0.353258
80303	ENSG00000115468	EFHD1	EF-hand domain family member D1	-1.02251	7.63042	7.31719	0.0115473	0.353258
7381	ENSG00000156467	UQCRB	ubiquinol-cytochrome c reductase binding protein	0.855687	8.16207	7.31191	0.0115741	0.353258
100189174	NA	TRH-GTG1-4	tRNA-His (anticodon GTG) 1-4	2.71648	0.898797	7.31137	0.0115768	0.353258
51573	ENSG00000006007	GDE1	glycerophosphodiester phosphodiesterase 1	-0.928574	4.81045	7.30455	0.0116115	0.353258
3895	ENSG00000126777	KTN1	kinectin 1	-0.790985	7.16076	7.30132	0.0116279	0.353258
10266	ENSG00000131477	RAMP2	receptor activity modifying protein 2	-1.09908	4.08361	7.29119	0.0116797	0.353258
84747	ENSG00000175970	UNC119B	unc-119 lipid binding chaperone B	-2.26867	2.08289	7.28717	0.0117003	0.353258
27248	ENSG00000068912	ERLEC1	endoplasmic reticulum lectin 1	-0.866672	6.04751	7.28307	0.0117214	0.353258
29074	ENSG00000112110	MRPL18	mitochondrial ribosomal protein L18	0.816342	5.9721	7.28096	0.0117322	0.353258
79879	ENSG00000100147	CCDC134	coiled-coil domain containing 134	-1.5333	3.16026	7.27989	0.0117377	0.353258
100130331	ENSG00000237250	LOC100130331	POTE ankyrin domain family, member F pseudogene	1.42175	3.62776	7.27666	0.0117543	0.353258
946	ENSG00000105492	SIGLEC6	sialic acid binding Ig like lectin 6	-1.594	5.51646	7.27627	0.0117564	0.353258
149047	ENSG00000237413	MGC27382	uncharacterized MGC27382	3.33019	0.765187	7.5644	0.0117692	0.353258
730249	ENSG00000102794	ACOD1	aconitate decarboxylase 1	3.33019	0.765187	7.5644	0.0117692	0.353258
6447	ENSG00000166922	SCG5	secretogranin V	3.33019	0.765187	7.5644	0.0117692	0.353258
6354	ENSG00000108688	CCL7	C-C motif chemokine ligand 7	3.33019	0.765187	7.5644	0.0117692	0.353258
101927262	NA	LOC101927262	uncharacterized LOC101927262	3.33019	0.765187	7.5644	0.0117692	0.353258
173	ENSG00000079557	AFM	afamin	3.33019	0.765187	7.5644	0.0117692	0.353258
79931	ENSG00000050730	TNIP3	TNFAIP3 interacting protein 3	3.33019	0.765187	7.5644	0.0117692	0.353258
5055	ENSG00000197632	SERPINB2	serpin family B member 2	-1.35078	8.65727	7.27275	0.0117745	0.353258
6229	ENSG00000138326	RPS24	ribosomal protein S24	0.93808	10.5532	7.26927	0.0117925	0.353258
4245	ENSG00000131446	MGAT1	alpha-1,3-mannosyl-glycoprotein 2-beta-N-acetylglucosaminyltransferase	-0.98362	6.75884	7.269	0.0117939	0.353258
6617	ENSG00000023608	SNAPC1	small nuclear RNA activating complex polypeptide 1	-1.89183	2.67761	7.26492	0.0118151	0.353519
587	ENSG00000105552	BCAT2	branched chain amino acid transaminase 2	-1.64966	3.89813	7.25186	0.011883	0.354758
25776	ENSG00000100211	CBY1	chibby 1, beta catenin antagonist	0.944582	5.54137	7.24769	0.0119048	0.354758
151056	ENSG00000163803	PLB1	phospholipase B1	-2.08903	3.11642	7.24722	0.0119073	0.354758
643847	ENSG00000229183	PGA4	pepsinogen A4	2.61128	1.96596	7.24602	0.0119135	0.354758
10067	ENSG00000116521	SCAMP3	secretory carrier membrane protein 3	-1.22812	4.44135	7.24326	0.011928	0.354758
715	ENSG00000159403	C1R	complement C1r	1.32189	3.90411	7.2426	0.0119315	0.354758
80310	ENSG00000170962	PDGFD	platelet derived growth factor D	-3.49589	1.89903	7.22843	0.012006	0.3566
58484	ENSG00000091106	NLRC4	NLR family CARD domain containing 4	2.47269	1.64626	7.2233	0.0120331	0.357031
5019	ENSG00000083720	OXCT1	3-oxoacid CoA-transferase 1	1.12288	4.30537	7.2098	0.0121047	0.358607
100505659	ENSG00000253138	LINC00967	long intergenic non-protein coding RNA 967	-1.24562	5.75759	7.20855	0.0121114	0.358607
3423	ENSG00000010404	IDS	iduronate 2-sulfatase	-0.893025	5.6819	7.19267	0.0121963	0.359011
257396	ENSG00000247796	MOCS2-DT	MOCS2 divergent transcript	2.90091	1.12601	7.19222	0.0121987	0.359011
3321	ENSG00000143061	IGSF3	immunoglobulin superfamily member 3	-0.961829	5.80693	7.18927	0.0122146	0.359011
101669764	NA	CMKLR2-AS	CMKLR2 antisense RNA	1.25175	3.69541	7.18877	0.0122173	0.359011
132625	ENSG00000179059	ZFP42	ZFP42 zinc finger protein	3.53669	0.782792	7.47144	0.0122262	0.359011
7180	ENSG00000124490	CRISP2	cysteine rich secretory protein 2	3.53669	0.782792	7.47144	0.0122262	0.359011
9892	ENSG00000065609	SNAP91	synaptosome associated protein 91	3.53669	0.782792	7.47144	0.0122262	0.359011
101928012	ENSG00000223646	LOC101928012	uncharacterized LOC101928012	3.53669	0.782792	7.47144	0.0122262	0.359011
1286	ENSG00000081052	COL4A4	collagen type IV alpha 4 chain	2.88058	0.939863	7.18165	0.0122557	0.359504
54664	ENSG00000106460	TMEM106B	transmembrane protein 106B	-0.955186	6.00306	7.17759	0.0122776	0.359747
100507250	ENSG00000247363	LOC100507250	uncharacterized LOC100507250	3.5543	0.784156	7.45891	0.0122893	0.359747
4000	ENSG00000160789	LMNA	lamin A/C	-0.883302	7.63072	7.17042	0.0123165	0.359927
55048	ENSG00000167987	VPS37C	VPS37C subunit of ESCRT-I	-1.10925	5.23368	7.16962	0.0123208	0.359927
81611	ENSG00000143401	ANP32E	acidic nuclear phosphoprotein 32 family member E	0.819866	6.18457	7.16388	0.012352	0.360468
79729	ENSG00000214193	SH3D21	SH3 domain containing 21	-2.82948	1.52257	7.14986	0.0124286	0.36233
5324	ENSG00000181690	PLAG1	PLAG1 zinc finger	-1.54223	3.0979	7.14631	0.0124481	0.362526
10424	ENSG00000164040	PGRMC2	progesterone receptor membrane component 2	-0.817088	7.70984	7.14363	0.0124628	0.362583
8394	ENSG00000143398	PIP5K1A	phosphatidylinositol-4-phosphate 5-kinase type 1 alpha	-0.894992	6.02123	7.13448	0.0125132	0.363468
11092	ENSG00000165698	SPACA9	sperm acrosome associated 9	-2.16111	2.10438	7.13346	0.0125188	0.363468
6400	ENSG00000071537	SEL1L	SEL1L adaptor subunit of SYVN1 ubiquitin ligase	-0.750595	6.16944	7.11999	0.0125935	0.365263
6541	ENSG00000139514	SLC7A1	solute carrier family 7 member 1	-1.11264	4.88476	7.11123	0.0126423	0.365825
5757	ENSG00000187514	PTMA	prothymosin alpha	-0.766541	6.63089	7.10862	0.0126569	0.365825
2517	ENSG00000179163	FUCA1	alpha-L-fucosidase 1	-0.849908	5.47081	7.1076	0.0126626	0.365825
51542	ENSG00000143952	VPS54	VPS54 subunit of GARP complex	-1.49896	3.5393	7.10406	0.0126824	0.365825
84701	ENSG00000131055	COX4I2	cytochrome c oxidase subunit 4I2	0.979022	6.9692	7.10197	0.0126941	0.365825
57214	ENSG00000103888	CEMIP	cell migration inducing hyaluronidase 1	-2.63768	2.631	7.10005	0.0127049	0.365825
3044	NA	HBBP1	hemoglobin subunit beta pseudogene 1	2.09646	1.66752	7.09568	0.0127295	0.365825
64983	ENSG00000106591	MRPL32	mitochondrial ribosomal protein L32	0.791143	5.71802	7.09003	0.0127613	0.365825
4809	ENSG00000100138	SNU13	small nuclear ribonucleoprotein 13	0.800047	8.02208	7.08958	0.0127638	0.365825
100287171	ENSG00000181404	WASHC1	WASH complex subunit 1	1.3736	3.85457	7.08877	0.0127684	0.365825
9739	ENSG00000099381	SETD1A	SET domain containing 1A, histone lysine methyltransferase	-0.928037	4.62022	7.08611	0.0127834	0.365825
285381	ENSG00000154813	DPH3	diphthamide biosynthesis 3	0.817456	5.39226	7.06981	0.0128759	0.365825
1583	ENSG00000140459	CYP11A1	cytochrome P450 family 11 subfamily A member 1	-1.13467	8.31954	7.06954	0.0128775	0.365825
3909	ENSG00000053747	LAMA3	laminin subunit alpha 3	-1.58967	4.11171	7.0658	0.0128988	0.365825
7462	ENSG00000086730	LAT2	linker for activation of T cells family member 2	1.50381	2.95476	7.06559	0.0129	0.365825
843	ENSG00000003400	CASP10	caspase 10	-1.82777	2.69419	7.05986	0.0129327	0.365825
56163	ENSG00000132972	RNF17	ring finger protein 17	2.97261	1.91723	7.05606	0.0129545	0.365825
4837	ENSG00000166741	NNMT	nicotinamide N-methyltransferase	1.08112	6.07047	7.0532	0.0129709	0.365825
25940	ENSG00000119812	FAM98A	family with sequence similarity 98 member A	-0.824014	6.49958	7.04851	0.0129979	0.365825
448834	ENSG00000203786	KPRP	keratinocyte proline rich protein	2.70955	0.698698	7.32024	0.0130123	0.365825
101929584	ENSG00000256115	LINC02443	long intergenic non-protein coding RNA 2443	2.70955	0.698698	7.32024	0.0130123	0.365825
677793	ENSG00000206612	SNORA2A	small nucleolar RNA, H/ACA box 2A	2.70955	0.698698	7.32024	0.0130123	0.365825
4624	ENSG00000197616	MYH6	myosin heavy chain 6	2.70955	0.698698	7.32024	0.0130123	0.365825
101928611	ENSG00000260172	LINC01413	long intergenic non-protein coding RNA 1413	2.70955	0.698698	7.32024	0.0130123	0.365825
27120	ENSG00000104901	DKKL1	dickkopf like acrosomal protein 1	2.70955	0.698698	7.32024	0.0130123	0.365825
27177	ENSG00000136696	IL36B	interleukin 36 beta	2.70955	0.698698	7.32024	0.0130123	0.365825
348751	ENSG00000226124	FTCDNL1	formiminotransferase cyclodeaminase N-terminal like	2.70955	0.698698	7.32024	0.0130123	0.365825
29034	ENSG00000280837	CPS1-IT1	CPS1 intronic transcript 1	2.70955	0.698698	7.32024	0.0130123	0.365825
100506492	ENSG00000235123	DSCAM-AS1	DSCAM antisense RNA 1	2.70955	0.698698	7.32024	0.0130123	0.365825
152586	ENSG00000205301	MGAT4D	MGAT4 family member D	2.70955	0.698698	7.32024	0.0130123	0.365825
10344	ENSG00000006606	CCL26	C-C motif chemokine ligand 26	2.70955	0.698698	7.32024	0.0130123	0.365825
64928	ENSG00000180992	MRPL14	mitochondrial ribosomal protein L14	0.770517	5.72841	7.02866	0.0131127	0.367982
54865	ENSG00000160818	GPATCH4	G-patch domain containing 4 (gene/pseudogene)	0.864418	5.19313	7.02765	0.0131186	0.367982
51552	ENSG00000119396	RAB14	RAB14, member RAS oncogene family	-0.800615	6.32353	7.02605	0.0131279	0.367982
219348	ENSG00000189129	PLAC9	placenta associated 9	-2.62472	2.3424	7.01803	0.0131746	0.368924
100505681	NA	NAPA-AS1	NAPA antisense RNA 1	-3.71851	1.16724	7.17966	0.0131904	0.368924
440957	ENSG00000168273	UQCC5	ubiquinol-cytochrome c reductase complex assembly factor 5	0.884275	5.13592	7.01362	0.0132004	0.368924
285266	ENSG00000223797	ENTPD3-AS1	ENTPD3 antisense RNA 1	1.94748	1.85362	7.00775	0.0132348	0.369218
102724927	ENSG00000262185	LINC02861	long intergenic non-protein coding RNA 2861	2.9374	0.924387	7.00738	0.013237	0.369218
746	ENSG00000134825	TMEM258	transmembrane protein 258	0.85261	8.91506	7.00388	0.0132576	0.36928
3563	ENSG00000185291	IL3RA	interleukin 3 receptor subunit alpha	-2.24778	4.92872	6.99957	0.0132829	0.36928
10761	ENSG00000170965	PLAC1	placenta enriched 1	-1.3541	8.49677	6.99441	0.0133134	0.36928
171220	ENSG00000290712	DSTNP2	DSTN pseudogene 2	-1.2682	5.07633	6.9915	0.0133306	0.36928
5861	ENSG00000138069	RAB1A	RAB1A, member RAS oncogene family	-0.782756	6.40569	6.99062	0.0133358	0.36928
100129195	ENSG00000269293	ZSCAN16-AS1	ZSCAN16 antisense RNA 1	1.35321	3.51227	6.98845	0.0133487	0.36928
140462	ENSG00000102048	ASB9	ankyrin repeat and SOCS box containing 9	2.7984	0.870935	7.23737	0.013351	0.36928
8615	ENSG00000138768	USO1	USO1 vesicle transport factor	-0.895161	6.61276	6.98672	0.0133589	0.36928
2990	ENSG00000169919	GUSB	glucuronidase beta	-0.802749	6.34795	6.98344	0.0133784	0.36928
4715	ENSG00000147684	NDUFB9	NADH:ubiquinone oxidoreductase subunit B9	0.747418	7.98612	6.98281	0.0133821	0.36928
113452	ENSG00000121900	TMEM54	transmembrane protein 54	-2.04688	4.50233	6.9819	0.0133875	0.36928
3002	ENSG00000100453	GZMB	granzyme B	3.12917	1.31589	6.98022	0.0133975	0.36928
10200	ENSG00000135698	MPHOSPH6	M-phase phosphoprotein 6	0.927612	5.3209	6.97512	0.0134279	0.36928
388789	ENSG00000232388	SMIM26	small integral membrane protein 26	0.766657	7.17619	6.97367	0.0134366	0.36928
8909	ENSG00000111405	ENDOU	endonuclease, poly(U) specific	-1.46394	7.20095	6.97308	0.0134401	0.36928
10856	ENSG00000183207	RUVBL2	RuvB like AAA ATPase 2	-1.50593	3.36931	6.97187	0.0134473	0.36928
84918	ENSG00000120256	LRP11	LDL receptor related protein 11	-0.94098	4.55937	6.96202	0.0135063	0.370542
2286	ENSG00000173486	FKBP2	FKBP prolyl isomerase 2	-1.10773	7.25242	6.95722	0.0135352	0.370976
5202	ENSG00000143256	PFDN2	prefoldin subunit 2	-0.907206	4.56197	6.95465	0.0135506	0.371041
9812	ENSG00000081791	DELE1	DAP3 binding cell death enhancer 1	-1.06916	4.87002	6.94868	0.0135866	0.3715
10598	ENSG00000100591	AHSA1	activator of HSP90 ATPase activity 1	-0.886206	6.15539	6.94754	0.0135935	0.3715
3382	ENSG00000003147	ICA1	islet cell autoantigen 1	-1.22337	4.18574	6.94327	0.0136194	0.371848
10352	ENSG00000116874	WARS2	tryptophanyl tRNA synthetase 2, mitochondrial	-2.19876	2.30708	6.93053	0.0136968	0.373441
29979	ENSG00000135018	UBQLN1	ubiquilin 1	-0.848722	5.56081	6.92934	0.013704	0.373441
65124	ENSG00000198142	SOWAHC	sosondowah ankyrin repeat domain family member C	-1.24403	4.17187	6.926	0.0137244	0.373453
8348	ENSG00000274641	H2BC17	H2B clustered histone 17	1.71797	2.20697	6.92496	0.0137308	0.373453
26255	ENSG00000213005	PTTG3P	pituitary tumor-transforming 3, pseudogene	1.21708	4.76395	6.9141	0.0137973	0.374847
9750	ENSG00000111913	RIPOR2	RHO family interacting cell polarization regulator 2	-1.26302	5.6015	6.90985	0.0138234	0.374847
105374693	NA	LINC02211	long intergenic non-protein coding RNA 2211	-3.84971	1.20537	7.06809	0.0138331	0.374847
57610	ENSG00000141084	RANBP10	RAN binding protein 10	-2.01539	2.43943	6.908	0.0138348	0.374847
54460	ENSG00000266472	MRPS21	mitochondrial ribosomal protein S21	0.802064	7.63677	6.9036	0.013862	0.375055
896	ENSG00000112576	CCND3	cyclin D3	0.894326	7.47888	6.90052	0.013881	0.375055
51704	ENSG00000167191	GPRC5B	G protein-coupled receptor class C group 5 member B	-2.04657	2.31013	6.90034	0.0138821	0.375055
9150	ENSG00000060069	CTDP1	CTD phosphatase subunit 1	-0.978795	5.44461	6.87161	0.0140611	0.379528
55032	ENSG00000138459	SLC35A5	solute carrier family 35 member A5	-0.9723	4.63776	6.86911	0.0140768	0.379592
6820	ENSG00000088002	SULT2B1	sulfotransferase family 2B member 1	-3.61802	1.97349	6.8648	0.0141039	0.379961
348254	NA	CCDC144CP	coiled-coil domain containing 144C, pseudogene	1.27962	4.18088	6.85827	0.014145	0.380453
100506990	NA	FAM86B2-DT	FAM86B2 divergent transcript	1.75924	2.28333	6.85711	0.0141523	0.380453
105373368	NA	MAGEA4-AS1	MAGEA4 antisense RNA 1	2.77955	0.887682	6.85341	0.0141758	0.380453
90134	ENSG00000184611	KCNH7	potassium voltage-gated channel subfamily H member 7	2.11532	1.63278	6.85254	0.0141812	0.380453
57835	ENSG00000188687	SLC4A5	solute carrier family 4 member 5	1.93748	1.96714	6.85005	0.0141971	0.380453
6357	ENSG00000181374	CCL13	C-C motif chemokine ligand 13	1.72938	3.51168	6.84795	0.0142104	0.380453
92737	ENSG00000187957	DNER	delta/notch like EGF repeat containing	2.66828	1.04396	6.84708	0.0142159	0.380453
8525	ENSG00000149091	DGKZ	diacylglycerol kinase zeta	-1.23292	3.65715	6.84167	0.0142503	0.381014
122509	ENSG00000165948	IFI27L1	interferon alpha inducible protein 27 like 1	1.27061	3.37387	6.83642	0.0142837	0.381549
23624	ENSG00000142273	CBLC	Cbl proto-oncogene C	-4.44113	1.47863	6.98974	0.014305	0.381758
25911	ENSG00000166171	DPCD	deleted in primary ciliary dyskinesia homolog (mouse)	1.08065	5.00221	6.83056	0.0143211	0.38183
4037	ENSG00000130881	LRP3	LDL receptor related protein 3	-2.74472	1.47778	6.82759	0.0143402	0.381979
51102	ENSG00000116353	MECR	mitochondrial trans-2-enoyl-CoA reductase	-1.56131	3.4839	6.82065	0.0143848	0.382678
100037417	ENSG00000099974	DDTL	D-dopachrome tautomerase like	-2.17016	3.62732	6.81762	0.0144042	0.382678
330	ENSG00000023445	BIRC3	baculoviral IAP repeat containing 3	1.37077	3.1414	6.81721	0.0144069	0.382678
28998	ENSG00000172172	MRPL13	mitochondrial ribosomal protein L13	0.817282	7.53396	6.80753	0.0144694	0.383926
23036	ENSG00000188994	ZNF292	zinc finger protein 292	0.824653	7.91065	6.80472	0.0144876	0.383926
22858	ENSG00000112144	CILK1	ciliogenesis associated kinase 1	-1.04017	5.8332	6.80366	0.0144944	0.383926
221336	ENSG00000151917	BEND6	BEN domain containing 6	-3.84636	1.22065	6.95578	0.0145151	0.384115
64924	ENSG00000145740	SLC30A5	solute carrier family 30 member 5	-0.971436	4.72863	6.7937	0.0145592	0.384767
83955	ENSG00000228224	NACA4P	NACA family member 4, pseudogene	0.791544	8.72749	6.79253	0.0145668	0.384767
51012	ENSG00000101166	PRELID3B	PRELI domain containing 3B	-0.785527	5.14387	6.78029	0.0146468	0.386521
100861550	NA	PLUT	PDX1 associated lncRNA, upregulator of transcription	-1.27447	3.61588	6.77735	0.0146662	0.386574
80313	ENSG00000148814	LRRC27	leucine rich repeat containing 27	-2.31129	2.00508	6.77379	0.0146895	0.386574
4637	ENSG00000092841	MYL6	myosin light chain 6	1.03366	11.361	6.77377	0.0146897	0.386574
169355	ENSG00000188676	IDO2	indoleamine 2,3-dioxygenase 2	-4.83465	1.68707	6.92546	0.0147055	0.386632
9563	ENSG00000049239	H6PD	hexose-6-phosphate dehydrogenase/glucose 1-dehydrogenase	-0.909708	4.51655	6.76175	0.014769	0.387669
79736	ENSG00000172171	TEFM	transcription elongation factor, mitochondrial	1.23319	3.82242	6.76057	0.0147768	0.387669
5062	ENSG00000180370	PAK2	p21 (RAC1) activated kinase 2	-0.803258	5.3146	6.75905	0.0147869	0.387669
5686	ENSG00000143106	PSMA5	proteasome 20S subunit alpha 5	0.831939	8.47308	6.75382	0.0148216	0.387669
6209	ENSG00000115268	RPS15	ribosomal protein S15	-1.04582	6.53099	6.75153	0.0148368	0.387669
6742	ENSG00000106028	SSBP1	single stranded DNA binding protein 1	0.814671	8.79221	6.74796	0.0148606	0.387669
6230	ENSG00000118181	RPS25	ribosomal protein S25	0.724134	6.47706	6.74749	0.0148637	0.387669
51124	ENSG00000134049	IER3IP1	immediate early response 3 interacting protein 1	-0.884328	6.51998	6.74747	0.0148639	0.387669
221035	ENSG00000165476	REEP3	receptor accessory protein 3	-0.75575	7.48731	6.74569	0.0148757	0.387669
4043	ENSG00000163956	LRPAP1	LDL receptor related protein associated protein 1	-0.95694	7.58257	6.74483	0.0148815	0.387669
8612	ENSG00000141934	PLPP2	phospholipid phosphatase 2	-2.13515	2.19185	6.73857	0.0149233	0.388223
57720	ENSG00000148358	GPR107	G protein-coupled receptor 107	-0.877404	5.14499	6.73756	0.0149301	0.388223
284100	ENSG00000290810	YWHAEP7	tyrosine 3-monooxygenase/tryptophan 5-monooxygenase activation protein epsilon pseudogene 7	2.30112	1.56679	6.73235	0.014965	0.388675
57228	ENSG00000170545	SMAGP	small cell adhesion glycoprotein	0.779898	7.46339	6.73088	0.0149748	0.388675
4023	ENSG00000175445	LPL	lipoprotein lipase	-1.55728	6.44458	6.72727	0.0149992	0.388951
152302	ENSG00000186162	CIDECP1	CIDEC pseudogene 1	1.15866	3.28549	6.72442	0.0150184	0.389094
133619	ENSG00000164244	PRRC1	proline rich coiled-coil 1	-0.857775	5.81797	6.71802	0.0150616	0.389268
79582	ENSG00000144451	SPAG16	sperm associated antigen 16	-1.30145	3.5799	6.71759	0.0150645	0.389268
2570	ENSG00000111886	GABRR2	gamma-aminobutyric acid type A receptor subunit rho2	2.67213	1.14964	6.71665	0.0150708	0.389268
7439	ENSG00000167995	BEST1	bestrophin 1	2.77604	1.03789	6.71531	0.0150799	0.389268
55270	ENSG00000136159	NUDT15	nudix hydrolase 15	-1.29797	3.28325	6.70821	0.015128	0.390127
3638	ENSG00000186480	INSIG1	insulin induced gene 1	-0.959847	6.48295	6.70548	0.0151467	0.390127
55269	ENSG00000121390	PSPC1	paraspeckle component 1	0.748371	5.99113	6.70313	0.0151626	0.390127
10578	ENSG00000115523	GNLY	granulysin	2.04913	2.70468	6.70136	0.0151747	0.390127
10410	ENSG00000142089	IFITM3	interferon induced transmembrane protein 3	0.866036	8.67923	6.7003	0.0151819	0.390127
2923	ENSG00000167004	PDIA3	protein disulfide isomerase family A member 3	-0.798458	6.96137	6.6945	0.0152215	0.390791
26872	ENSG00000164647	STEAP1	STEAP family member 1	-4.22265	1.35611	6.83955	0.0152603	0.391123
57213	ENSG00000123178	SPRYD7	SPRY domain containing 7	-1.19532	4.17792	6.6886	0.015262	0.391123
3898	ENSG00000159166	LAD1	ladinin 1	-1.35725	4.8941	6.68491	0.0152873	0.391419
105378947	NA	LOC105378947	proline-rich extensin-like protein EPR1	-2.97781	1.58727	6.6794	0.0153252	0.39192
79587	ENSG00000134905	CARS2	cysteinyl-tRNA synthetase 2, mitochondrial	-2.4226	2.48666	6.67619	0.0153474	0.39192
25963	ENSG00000103978	TMEM87A	transmembrane protein 87A	-0.96192	6.85577	6.67288	0.0153702	0.39192
84561	ENSG00000221955	SLC12A8	solute carrier family 12 member 8	-3.54876	2.08485	6.67179	0.0153778	0.39192
10447	ENSG00000196937	FAM3C	FAM3 metabolism regulating signaling molecule C	-0.824992	5.41515	6.67011	0.0153894	0.39192
3430	ENSG00000068079	IFI35	interferon induced protein 35	1.11574	4.18605	6.66927	0.0153952	0.39192
10154	ENSG00000136040	PLXNC1	plexin C1	-2.94686	1.7578	6.66687	0.0154118	0.39192
3899	ENSG00000144218	AFF3	ALF transcription elongation factor 3	-1.64227	2.7596	6.66503	0.0154246	0.39192
11266	ENSG00000081721	DUSP12	dual specificity phosphatase 12	-1.67101	2.8247	6.66409	0.0154311	0.39192
23492	ENSG00000100307	CBX7	chromobox 7	-1.38286	3.83183	6.65753	0.0154767	0.392727
51714	ENSG00000198843	SELENOT	selenoprotein T	-0.803648	5.93497	6.6531	0.0155076	0.392898
100132929	NA	FAM25BP	protein FAM25	-1.94081	2.39773	6.6526	0.0155111	0.392898
163882	ENSG00000162852	CNST	consortin, connexin sorting protein	-1.07468	4.26216	6.64077	0.015594	0.394188
6223	ENSG00000105372	RPS19	ribosomal protein S19	0.787537	8.35032	6.63841	0.0156106	0.394188
3073	ENSG00000213614	HEXA	hexosaminidase subunit alpha	-1.00185	6.7097	6.63833	0.0156112	0.394188
55062	ENSG00000070540	WIPI1	WD repeat domain, phosphoinositide interacting 1	-0.864315	5.52024	6.63741	0.0156176	0.394188
51065	ENSG00000185088	RPS27L	ribosomal protein S27 like	0.864914	7.68407	6.63322	0.0156472	0.394267
3043	ENSG00000244734	HBB	hemoglobin subunit beta	1.21938	10.5982	6.63303	0.0156485	0.394267
26156	ENSG00000171490	RSL1D1	ribosomal L1 domain containing 1	0.811193	7.23774	6.62766	0.0156864	0.394648
57001	ENSG00000196636	SDHAF3	succinate dehydrogenase complex assembly factor 3	1.18802	3.80826	6.62518	0.0157039	0.394648
2734	ENSG00000090863	GLG1	golgi glycoprotein 1	-0.933196	7.01962	6.62499	0.0157053	0.394648
9741	ENSG00000068697	LAPTM4A	lysosomal protein transmembrane 4 alpha	-1.05772	9.75688	6.62207	0.015726	0.394818
100507331	ENSG00000272589	ZSWIM8-AS1	ZSWIM8 antisense RNA 1	2.76227	0.867704	6.6186	0.0157506	0.395087
1635	ENSG00000129187	DCTD	dCMP deaminase	-1.6221	2.77384	6.61141	0.0158018	0.395951
79017	ENSG00000006625	GGCT	gamma-glutamylcyclotransferase	0.764795	6.80755	6.60638	0.0158376	0.395951
166929	ENSG00000164023	SGMS2	sphingomyelin synthase 2	-0.948123	4.68078	6.60374	0.0158565	0.395951
51069	ENSG00000112651	MRPL2	mitochondrial ribosomal protein L2	-1.43866	3.49706	6.60144	0.0158729	0.395951
55338	NA	LINC01949	long intergenic non-protein coding RNA 1949	0.977829	8.63857	6.60102	0.015876	0.395951
51227	ENSG00000185808	PIGP	phosphatidylinositol glycan anchor biosynthesis class P	0.804057	5.21417	6.60081	0.0158775	0.395951
284047	ENSG00000291090	CCDC144BP	coiled-coil domain containing 144B, pseudogene	1.14343	4.40746	6.60009	0.0158827	0.395951
64756	ENSG00000123472	ATPAF1	ATP synthase mitochondrial F1 complex assembly factor 1	-1.19676	3.47903	6.59513	0.0159182	0.396489
55283	ENSG00000055732	MCOLN3	mucolipin TRP cation channel 3	1.87183	2.12334	6.58555	0.0159872	0.397245
6164	ENSG00000109475	RPL34	ribosomal protein L34	0.763672	8.63289	6.58445	0.0159952	0.397245
51266	ENSG00000165682	CLEC1B	C-type lectin domain family 1 member B	2.31282	2.0178	6.58321	0.0160041	0.397245
51022	ENSG00000023572	GLRX2	glutaredoxin 2	-2.24548	2.17515	6.58316	0.0160045	0.397245
51255	ENSG00000168894	RNF181	ring finger protein 181	0.763034	7.43524	6.57139	0.0160898	0.399013
10913	ENSG00000135960	EDAR	ectodysplasin A receptor	2.69937	0.861586	6.56133	0.0161631	0.399774
3281	ENSG00000230989	HSBP1	heat shock factor binding protein 1	0.765042	8.06474	6.56086	0.0161665	0.399774
7184	ENSG00000166598	HSP90B1	heat shock protein 90 beta family member 1	-0.924679	9.22892	6.55964	0.0161755	0.399774
55601	ENSG00000137628	DDX60	DExD/H-box helicase 60	-1.14373	4.2804	6.55946	0.0161768	0.399774
51506	ENSG00000143222	UFC1	ubiquitin-fold modifier conjugating enzyme 1	0.777037	8.23942	6.55695	0.0161952	0.39988
388	ENSG00000143878	RHOB	ras homolog family member B	-0.848737	5.92891	6.55209	0.0162308	0.400399
805	ENSG00000143933	CALM2	calmodulin 2	0.835319	8.72795	6.55023	0.0162444	0.400399
9338	ENSG00000172465	TCEAL1	transcription elongation factor A like 1	1.05765	4.20924	6.54351	0.0162939	0.401271
140465	ENSG00000196465	MYL6B	myosin light chain 6B	1.03025	4.49101	6.54073	0.0163144	0.401428
63917	ENSG00000178234	GALNT11	polypeptide N-acetylgalactosaminyltransferase 11	-1.08287	5.1338	6.5369	0.0163426	0.401565
79731	ENSG00000137513	NARS2	asparaginyl-tRNA synthetase 2, mitochondrial	-2.00961	2.60032	6.53499	0.0163568	0.401565
79817	ENSG00000120162	MOB3B	MOB kinase activator 3B	-1.03435	4.45619	6.53423	0.0163624	0.401565
344558	ENSG00000172985	SH3RF3	SH3 domain containing ring finger 3	-2.78612	1.66569	6.5281	0.0164079	0.402017
7567	ENSG00000157429	ZNF19	zinc finger protein 19	-3.92219	1.23442	6.67213	0.0164091	0.402017
80895	ENSG00000132323	ILKAP	ILK associated serine/threonine phosphatase	-1.92785	2.68389	6.52471	0.0164331	0.402256
1050	ENSG00000245848	CEBPA	CCAAT enhancer binding protein alpha	-0.761985	7.81372	6.5171	0.0164898	0.403297
9232	ENSG00000164611	PTTG1	PTTG1 regulator of sister chromatid separation, securin	1.52731	2.99489	6.51126	0.0165335	0.403687
29087	ENSG00000151500	THYN1	thymocyte nuclear protein 1	0.925281	4.87517	6.50903	0.0165502	0.403687
64968	ENSG00000243927	MRPS6	mitochondrial ribosomal protein S6	-1.30238	4.35472	6.50613	0.016572	0.403687
9320	ENSG00000153827	TRIP12	thyroid hormone receptor interactor 12	-0.813589	5.95837	6.50387	0.0165889	0.403687
1603	ENSG00000129562	DAD1	defender against cell death 1	0.77515	7.98499	6.50343	0.0165922	0.403687
57561	ENSG00000113369	ARRDC3	arrestin domain containing 3	-0.886047	6.22431	6.50263	0.0165982	0.403687
55362	ENSG00000137216	TMEM63B	transmembrane protein 63B	-1.43707	2.87107	6.5017	0.0166053	0.403687
440138	ENSG00000253710	ALG11	ALG11 alpha-1,2-mannosyltransferase	-0.914708	4.47546	6.49953	0.0166216	0.403739
6588	ENSG00000170290	SLN	sarcolipin	3.05285	0.950659	6.48776	0.0167105	0.405093
151126	ENSG00000144331	ZNF385B	zinc finger protein 385B	3.05285	0.950659	6.48776	0.0167105	0.405093
28955	ENSG00000182108	DEXI	Dexi homolog	-1.18372	3.70235	6.48649	0.0167201	0.405093
4644	ENSG00000197535	MYO5A	myosin VA	1.41193	3.22472	6.48187	0.0167552	0.405219
58475	ENSG00000166927	MS4A7	membrane spanning 4-domains A7	0.783698	6.02718	6.48042	0.0167662	0.405219
6039	ENSG00000169413	RNASE6	ribonuclease A family member k6	1.54601	3.26053	6.48016	0.0167682	0.405219
4695	ENSG00000131495	NDUFA2	NADH:ubiquinone oxidoreductase subunit A2	0.684752	7.16221	6.46802	0.0168608	0.406894
287	ENSG00000145362	ANK2	ankyrin 2	-4.8101	1.64466	6.60838	0.0168715	0.406894
645	ENSG00000090013	BLVRB	biliverdin reductase B	-1.61072	5.57313	6.46545	0.0168805	0.406894
53335	ENSG00000119866	BCL11A	BCL11 transcription factor A	3.05339	1.17285	6.45972	0.0169244	0.40732
57037	ENSG00000106524	ANKMY2	ankyrin repeat and MYND domain containing 2	-1.42314	3.49831	6.45799	0.0169377	0.40732
10195	ENSG00000214160	ALG3	ALG3 alpha-1,3- mannosyltransferase	-1.04271	3.91849	6.45538	0.0169579	0.40732
7164	ENSG00000111907	TPD52L1	TPD52 like 1	-1.52782	2.81088	6.45493	0.0169613	0.40732
51606	ENSG00000047249	ATP6V1H	ATPase H+ transporting V1 subunit H	-0.946014	5.24642	6.45292	0.0169768	0.40732
7507	ENSG00000136936	XPA	XPA, DNA damage recognition and repair factor	-1.53708	3.87816	6.44941	0.0170039	0.40732
84910	ENSG00000153214	TMEM87B	transmembrane protein 87B	-0.79357	4.8974	6.44839	0.0170118	0.40732
633	ENSG00000182492	BGN	biglycan	-1.09023	7.09137	6.44605	0.0170299	0.40732
7916	ENSG00000204469	PRRC2A	proline rich coiled-coil 2A	-0.744237	5.49397	6.44477	0.0170398	0.40732
693146	ENSG00000207951	MIR561	microRNA 561	2.43865	1.49027	6.44453	0.0170416	0.40732
3164	ENSG00000123358	NR4A1	nuclear receptor subfamily 4 group A member 1	1.42043	2.84827	6.43753	0.0170959	0.407744
9645	ENSG00000133816	MICAL2	microtubule associated monooxygenase, calponin and LIM domain containing 2	1.95693	2.3037	6.43702	0.0170999	0.407744
8076	ENSG00000197614	MFAP5	microfibril associated protein 5	-1.05179	9.37792	6.43669	0.0171024	0.407744
3148	ENSG00000164104	HMGB2	high mobility group box 2	0.752695	6.62985	6.43322	0.0171294	0.408026
85013	ENSG00000132406	TMEM128	transmembrane protein 128	-1.49804	3.20816	6.43148	0.017143	0.408026
10845	ENSG00000166855	CLPX	caseinolytic mitochondrial matrix peptidase chaperone subunit X	-1.0673	4.44875	6.42893	0.0171628	0.408156
10389	ENSG00000102098	SCML2	Scm polycomb group protein like 2	-1.63922	2.98561	6.42523	0.0171918	0.408171
9180	ENSG00000145623	OSMR	oncostatin M receptor	-0.960952	6.23616	6.4241	0.0172006	0.408171
222698	ENSG00000189134	NKAPL	NFKB activating protein like	1.73886	1.8183	6.42333	0.0172066	0.408171
10970	ENSG00000136026	CKAP4	cytoskeleton associated protein 4	-0.775045	6.10249	6.41721	0.0172546	0.408593
53942	ENSG00000149972	CNTN5	contactin 5	2.48413	1.34643	6.41635	0.0172613	0.408593
644285	NA	LOC644285	uncharacterized LOC644285	1.72497	2.47129	6.41427	0.0172776	0.408593
7319	ENSG00000077721	UBE2A	ubiquitin conjugating enzyme E2 A	-1.07839	6.48203	6.41373	0.0172819	0.408593
349136	ENSG00000187260	WDR86	WD repeat domain 86	-2.81149	1.671	6.4047	0.0173531	0.409934
7494	ENSG00000100219	XBP1	X-box binding protein 1	-0.835843	6.28213	6.40168	0.0173769	0.40998
1839	ENSG00000113070	HBEGF	heparin binding EGF like growth factor	1.38406	3.4455	6.39838	0.017403	0.40998
158	ENSG00000239900	ADSL	adenylosuccinate lyase	0.758952	7.51096	6.3979	0.0174068	0.40998
81502	ENSG00000101294	HM13	histocompatibility minor 13	-1.06173	6.33472	6.39715	0.0174128	0.40998
8720	ENSG00000140943	MBTPS1	membrane bound transcription factor peptidase, site 1	-0.821973	4.65997	6.39398	0.0174379	0.410153
729609	NA	LOC729609	uncharacterized LOC729609	2.6139	0.84283	6.39258	0.017449	0.410153
169026	ENSG00000164756	SLC30A8	solute carrier family 30 member 8	-4.37688	1.45812	6.52652	0.0174864	0.410692
10630	ENSG00000162493	PDPN	podoplanin	0.979679	6.25804	6.3845	0.0175134	0.410985
4131	ENSG00000131711	MAP1B	microtubule associated protein 1B	1.12735	4.54649	6.38123	0.0175395	0.411258
4726	ENSG00000145494	NDUFS6	NADH:ubiquinone oxidoreductase subunit S6	-1.12286	4.94468	6.37513	0.0175883	0.411529
25978	ENSG00000083937	CHMP2B	charged multivesicular body protein 2B	-1.01994	5.92587	6.37441	0.0175941	0.411529
10263	ENSG00000167797	CDK2AP2	cyclin dependent kinase 2 associated protein 2	-0.984453	4.45743	6.37418	0.0175959	0.411529
4199	ENSG00000065833	ME1	malic enzyme 1	2.56168	1.06352	6.37002	0.0176292	0.411529
4152	ENSG00000141644	MBD1	methyl-CpG binding domain protein 1	-1.13323	3.99765	6.36605	0.0176612	0.411529
101669762	ENSG00000281406	BLACAT1	BLACAT1 overlapping LEMD1 locus	2.50937	0.854149	6.36534	0.017667	0.411529
641451	ENSG00000207468	SNORA19	small nucleolar RNA, H/ACA box 19	2.50937	0.854149	6.36534	0.017667	0.411529
285676	ENSG00000178187	ZNF454	zinc finger protein 454	2.50937	0.854149	6.36534	0.017667	0.411529
5125	ENSG00000099139	PCSK5	proprotein convertase subtilisin/kexin type 5	-1.45427	3.18002	6.35541	0.0177471	0.412927
9871	ENSG00000150961	SEC24D	SEC24 homolog D, COPII coat complex component	-0.770795	5.21102	6.3543	0.0177561	0.412927
9720	ENSG00000170160	CCDC144A	coiled-coil domain containing 144A	1.19565	4.20849	6.34569	0.017826	0.414142
101559451	ENSG00000244184	PELP1-DT	PELP1 divergent transcript	0.705887	5.63408	6.34225	0.017854	0.414142
5434	ENSG00000099817	POLR2E	RNA polymerase II, I and III subunit E	-1.27734	4.24338	6.34225	0.017854	0.414142
79153	ENSG00000102886	GDPD3	glycerophosphodiester phosphodiesterase domain containing 3	-1.41296	3.82134	6.33904	0.0178801	0.414142
143662	ENSG00000169550	MUC15	mucin 15, cell surface associated	-1.11962	7.05965	6.33862	0.0178836	0.414142
29078	ENSG00000123545	NDUFAF4	NADH:ubiquinone oxidoreductase complex assembly factor 4	0.992196	5.5098	6.33688	0.0178977	0.414142
5997	ENSG00000116741	RGS2	regulator of G protein signaling 2	0.93947	4.9806	6.33533	0.0179104	0.414142
5328	ENSG00000122861	PLAU	plasminogen activator, urokinase	-0.972398	5.12579	6.32491	0.0179958	0.415778
10949	ENSG00000177733	HNRNPA0	heterogeneous nuclear ribonucleoprotein A0	-0.7365	6.45349	6.31757	0.0180563	0.416729
8050	ENSG00000110435	PDHX	pyruvate dehydrogenase complex component X	-0.823858	5.88151	6.31534	0.0180747	0.416729
22998	ENSG00000064042	LIMCH1	LIM and calponin homology domains 1	-0.916594	7.09957	6.31458	0.018081	0.416729
54507	ENSG00000143382	ADAMTSL4	ADAMTS like 4	-0.811226	6.03411	6.31186	0.0181034	0.416907
4569	NA	TRNM	tRNA-Met	-1.16817	4.23854	6.303	0.0181769	0.41822
613037	ENSG00000198064	NPIPB13	nuclear pore complex interacting protein family, member B13	1.02155	5.31577	6.30017	0.0182005	0.41822
338657	ENSG00000186166	CENATAC	centrosomal AT-AC splicing factor	1.63196	2.60924	6.2946	0.0182468	0.41822
1604	ENSG00000196352	CD55	CD55 molecule (Cromer blood group)	-0.997607	7.54037	6.29415	0.0182506	0.41822
653067	ENSG00000204382	XAGE1B	X antigen family member 1B	-6.32538	2.60701	6.42912	0.0182506	0.41822
4064	ENSG00000134061	CD180	CD180 molecule	2.21856	1.47793	6.29369	0.0182544	0.41822
494143	ENSG00000143942	CHAC2	ChaC glutathione specific gamma-glutamylcyclotransferase 2	-3.99367	1.26422	6.42752	0.0182635	0.41822
79613	ENSG00000103047	TANGO6	transport and golgi organization 6 homolog	2.37397	1.65842	6.28979	0.018287	0.41842
126364	ENSG00000175489	LRRC25	leucine rich repeat containing 25	1.64606	2.21146	6.28603	0.0183185	0.418737
122622	ENSG00000185100	ADSS1	adenylosuccinate synthase 1	-4.03786	1.30293	6.41922	0.0183304	0.418737
58489	ENSG00000136379	ABHD17C	abhydrolase domain containing 17C, depalmitoylase	-1.01102	4.47807	6.27902	0.0183773	0.419473
4705	ENSG00000130414	NDUFA10	NADH:ubiquinone oxidoreductase subunit A10	-1.2025	5.2923	6.27489	0.0184121	0.419929
22979	ENSG00000084710	EFR3B	EFR3 homolog B	-3.65676	1.1328	6.40387	0.0184547	0.420508
205564	ENSG00000119231	SENP5	SUMO specific peptidase 5	-0.858478	4.47997	6.26737	0.0184756	0.420508
168537	ENSG00000179144	GIMAP7	GTPase, IMAP family member 7	0.850416	4.84735	6.26139	0.0185263	0.420508
430	ENSG00000183734	ASCL2	achaete-scute family bHLH transcription factor 2	-2.36016	4.3194	6.25998	0.0185383	0.420508
55289	ENSG00000153093	ACOXL	acyl-CoA oxidase like	-1.96749	2.61174	6.25652	0.0185676	0.420508
9482	ENSG00000170310	STX8	syntaxin 8	0.845995	6.94079	6.25581	0.0185737	0.420508
5320	ENSG00000188257	PLA2G2A	phospholipase A2 group IIA	1.18814	8.35319	6.2556	0.0185755	0.420508
116150	ENSG00000153989	NUS1	NUS1 dehydrodolichyl diphosphate synthase subunit	-0.91883	4.33207	6.25557	0.0185757	0.420508
3615	ENSG00000178035	IMPDH2	inosine monophosphate dehydrogenase 2	0.770418	5.49124	6.25445	0.0185853	0.420508
100507607	ENSG00000196993	NPIPB9	nuclear pore complex interacting protein family member B9	1.41203	3.10908	6.25182	0.0186077	0.420508
7979	ENSG00000127922	SEM1	SEM1 26S proteasome subunit	0.752969	7.52345	6.24662	0.018652	0.420508
3176	ENSG00000150540	HNMT	histamine N-methyltransferase	0.996564	5.79792	6.24457	0.0186695	0.420508
10618	ENSG00000152291	TGOLN2	trans-golgi network protein 2	-0.810635	5.93716	6.24447	0.0186704	0.420508
57191	ENSG00000178201	VN1R1	vomeronasal 1 receptor 1	2.54027	0.874871	6.24393	0.0186751	0.420508
4717	ENSG00000109390	NDUFC1	NADH:ubiquinone oxidoreductase subunit C1	-1.11817	6.33706	6.24265	0.018686	0.420508
23753	ENSG00000128228	SDF2L1	stromal cell derived factor 2 like 1	-1.20613	3.94406	6.24125	0.018698	0.420508
653220	ENSG00000204379	XAGE1A	X antigen family member 1A	-6.28033	2.57313	6.37365	0.0187024	0.420508
11068	ENSG00000114395	CYB561D2	cytochrome b561 family member D2	-0.981922	4.66784	6.23963	0.0187119	0.420508
9524	ENSG00000099797	TECR	trans-2,3-enoyl-CoA reductase	-1.27903	7.12874	6.23882	0.0187189	0.420508
401152	ENSG00000164096	C4orf3	chromosome 4 open reading frame 3	0.771427	7.8505	6.23367	0.0187631	0.421168
8526	ENSG00000153933	DGKE	diacylglycerol kinase epsilon	1.62725	2.00535	6.22646	0.0188252	0.422229
26297	ENSG00000129158	SERGEF	secretion regulating guanine nucleotide exchange factor	-4.30202	1.41469	6.35469	0.0188596	0.422667
101929372	ENSG00000236754	LOC101929372	uncharacterized LOC101929372	-3.52851	1.08922	6.35117	0.018889	0.422699
5608	ENSG00000108984	MAP2K6	mitogen-activated protein kinase kinase 6	-4.38372	1.46259	6.35095	0.0188908	0.422699
645553	ENSG00000268621	IGFL2-AS1	IGFL2 antisense RNA 1	-3.49727	2.02225	6.21529	0.0189219	0.423062
767563	ENSG00000201700	SNORD113-3	small nucleolar RNA, C/D box 113-3	-3.43273	1.06426	6.3451	0.0189397	0.423126
100289097	ENSG00000282826	FRG1CP	FSHD region gene 1 family member C, pseudogene	0.710733	5.50444	6.21142	0.0189556	0.423149
1479	ENSG00000176102	CSTF3	cleavage stimulation factor subunit 3	0.801835	5.391	6.20564	0.019006	0.423902
4891	ENSG00000110911	SLC11A2	solute carrier family 11 member 2	-1.02062	5.06811	6.20412	0.0190192	0.423902
7384	ENSG00000010256	UQCRC1	ubiquinol-cytochrome c reductase core protein 1	-0.922369	6.1384	6.19531	0.0190963	0.425286
401145	ENSG00000184305	CCSER1	coiled-coil serine rich protein 1	2.01588	1.74714	6.19059	0.0191378	0.425685
7155	ENSG00000077097	TOP2B	DNA topoisomerase II beta	-0.713383	6.15175	6.18986	0.0191442	0.425685
387715	ENSG00000254636	ARMS2	age-related maculopathy susceptibility 2	-2.80995	3.78515	6.18107	0.0192217	0.426952
6525	ENSG00000183963	SMTN	smoothelin	-3.85486	1.21596	6.30817	0.0192517	0.426952
55761	ENSG00000052841	TTC17	tetratricopeptide repeat domain 17	-0.990715	4.80463	6.17561	0.01927	0.426952
220	ENSG00000184254	ALDH1A3	aldehyde dehydrogenase 1 family member A3	-1.37814	2.95139	6.17553	0.0192707	0.426952
205251	ENSG00000175701	MTLN	mitoregulin	-2.10817	3.48865	6.17489	0.0192764	0.426952
488	ENSG00000174437	ATP2A2	ATPase sarcoplasmic/endoplasmic reticulum Ca2+ transporting 2	-0.897719	4.45887	6.16954	0.0193238	0.42739
51258	ENSG00000111639	MRPL51	mitochondrial ribosomal protein L51	0.761974	6.00262	6.16768	0.0193403	0.42739
55619	ENSG00000135905	DOCK10	dedicator of cytokinesis 10	2.39064	1.31686	6.16758	0.0193413	0.42739
7025	ENSG00000175745	NR2F1	nuclear receptor subfamily 2 group F member 1	1.1181	4.5881	6.16157	0.0193948	0.428238
719	ENSG00000171860	C3AR1	complement C3a receptor 1	1.27425	3.1899	6.15536	0.0194503	0.428334
55669	ENSG00000171109	MFN1	mitofusin 1	-1.12755	3.83164	6.15515	0.0194521	0.428334
164	ENSG00000166747	AP1G1	adaptor related protein complex 1 subunit gamma 1	-0.836241	5.00887	6.15454	0.0194576	0.428334
2534	ENSG00000010810	FYN	FYN proto-oncogene, Src family tyrosine kinase	1.30163	3.99706	6.15272	0.0194739	0.428334
4711	ENSG00000136521	NDUFB5	NADH:ubiquinone oxidoreductase subunit B5	0.754134	7.58272	6.15261	0.0194749	0.428334
813	ENSG00000128595	CALU	calumenin	-0.844821	9.09134	6.15097	0.0194896	0.428334
26121	ENSG00000105618	PRPF31	pre-mRNA processing factor 31	0.888908	5.6558	6.14203	0.01957	0.429516
29842	ENSG00000115112	TFCP2L1	transcription factor CP2 like 1	0.795539	5.38881	6.14047	0.0195841	0.429516
58494	ENSG00000154721	JAM2	junctional adhesion molecule 2	-1.06622	5.32221	6.13995	0.0195888	0.429516
2214	ENSG00000203747	FCGR3A	Fc gamma receptor IIIa	1.02733	5.14177	6.12275	0.0197446	0.432598
101927489	ENSG00000230098	TCERG1L-AS1	TCERG1L antisense RNA 1	-3.81283	1.20314	6.246	0.0197898	0.433254
29121	ENSG00000069493	CLEC2D	C-type lectin domain family 2 member D	0.686328	7.10417	6.11059	0.0198555	0.434359
1668	ENSG00000239839	DEFA3	defensin alpha 3	2.24611	8.75268	6.10868	0.019873	0.434406
80071	ENSG00000149548	CCDC15	coiled-coil domain containing 15	-2.42674	2.09594	6.10657	0.0198924	0.434495
342909	ENSG00000186026	ZNF284	zinc finger protein 284	2.67629	1.17309	6.10243	0.0199304	0.434953
4881	ENSG00000169418	NPR1	natriuretic peptide receptor 1	-2.24948	1.9948	6.09993	0.0199534	0.434953
5332	ENSG00000101333	PLCB4	phospholipase C beta 4	-3.23552	1.89097	6.09911	0.0199609	0.434953
26519	ENSG00000134809	TIMM10	translocase of inner mitochondrial membrane 10	0.992035	6.24976	6.09679	0.0199823	0.434953
8218	ENSG00000070371	CLTCL1	clathrin heavy chain like 1	-4.0124	1.26116	6.22233	0.019999	0.434953
91689	ENSG00000183172	SMDT1	single-pass membrane protein with aspartate rich tail 1	-1.10477	4.92741	6.09431	0.0200052	0.434953
55732	ENSG00000000460	FIRRM	FIGNL1 interacting regulator of recombination and mitosis	2.33002	1.86075	6.0911	0.0200349	0.435264
100507392	ENSG00000254703	SENCR	smooth muscle and endothelial cell enriched migration/differentiation-associated lncRNA	2.28576	1.91661	6.08805	0.0200631	0.435543
27076	ENSG00000124466	LYPD3	LY6/PLAUR domain containing 3	-1.19189	4.29434	6.0803	0.020135	0.436108
2801	ENSG00000167110	GOLGA2	golgin A2	-0.713256	7.40657	6.07905	0.0201466	0.436108
55572	ENSG00000110074	FOXRED1	FAD dependent oxidoreductase domain containing 1	1.3397	3.37236	6.07695	0.0201661	0.436108
79864	ENSG00000109944	JHY	junctional cadherin complex regulator	-1.35919	3.36562	6.07619	0.0201732	0.436108
10744	ENSG00000250254	PTTG2	pituitary tumor-transforming 2	1.12784	4.60416	6.07412	0.0201925	0.436108
57003	ENSG00000108588	CCDC47	coiled-coil domain containing 47	-0.777878	6.5998	6.07181	0.020214	0.436108
100506660	ENSG00000245614	DDX11-AS1	DDX11 antisense RNA 1	2.83654	0.889254	6.07125	0.0202193	0.436108
1212	ENSG00000175416	CLTB	clathrin light chain B	-1.00901	5.37636	6.06934	0.0202371	0.436108
9049	ENSG00000110711	AIP	aryl hydrocarbon receptor interacting protein	-1.93546	2.88925	6.06916	0.0202388	0.436108
130612	ENSG00000188760	TMEM198	transmembrane protein 198	-3.56449	1.11557	6.19497	0.0202439	0.436108
374395	ENSG00000185475	TMEM179B	transmembrane protein 179B	-0.865245	5.2359	6.06711	0.020258	0.436108
27258	ENSG00000170860	LSM3	LSM3 homolog, U6 small nuclear RNA and mRNA degradation associated	0.722835	7.38576	6.06457	0.0202818	0.436289
728358	ENSG00000240247	DEFA1B	defensin alpha 1B	2.24482	8.7496	6.06134	0.0203121	0.43661
10213	ENSG00000115233	PSMD14	proteasome 26S subunit, non-ATPase 14	0.690611	7.26616	6.05813	0.0203422	0.43675
91647	ENSG00000171953	ATPAF2	ATP synthase mitochondrial F1 complex assembly factor 2	-1.53214	2.91709	6.05665	0.0203561	0.43675
401207	ENSG00000164241	C5orf63	chromosome 5 open reading frame 63	1.5621	2.83968	6.05574	0.0203647	0.43675
51060	ENSG00000117862	TXNDC12	thioredoxin domain containing 12	-0.938647	4.42455	6.05278	0.0203926	0.436779
1667	ENSG00000206047	DEFA1	defensin alpha 1	2.24292	8.74622	6.05233	0.0203968	0.436779
9589	ENSG00000146457	WTAP	WT1 associated protein	-0.77509	5.01305	6.05039	0.0204151	0.43684
115752	ENSG00000166938	DIS3L	DIS3 like exosome 3'-5' exoribonuclease	-1.91063	2.22179	6.04473	0.0204686	0.437598
100506844	ENSG00000257698	GIHCG	GIHCG inhibitor of miR-200b/200a/429 expression	1.43436	2.54549	6.03912	0.0205218	0.437598
22930	ENSG00000115839	RAB3GAP1	RAB3 GTPase activating protein catalytic subunit 1	-0.940329	6.10692	6.02969	0.0206116	0.437598
51454	ENSG00000144366	GULP1	GULP PTB domain containing engulfment adaptor 1	-1.12527	7.182	6.02965	0.0206119	0.437598
5787	ENSG00000127329	PTPRB	protein tyrosine phosphatase receptor type B	-1.12126	3.84133	6.02791	0.0206285	0.437598
100188986	NA	TRH-GTG1-7	tRNA-His (anticodon GTG) 1-7	2.43038	1.09712	6.02356	0.0206701	0.437598
31	ENSG00000278540	ACACA	acetyl-CoA carboxylase alpha	1.04192	3.53518	6.02309	0.0206746	0.437598
89857	ENSG00000172578	KLHL6	kelch like family member 6	2.39176	1.18632	6.02273	0.020678	0.437598
64283	ENSG00000214944	ARHGEF28	Rho guanine nucleotide exchange factor 28	2.87308	0.900332	6.0163	0.0207397	0.437598
100130705	ENSG00000272899	SPMIP1	sperm microtubule inner protein 1	2.39135	1.1098	6.01577	0.0207448	0.437598
79888	ENSG00000153395	LPCAT1	lysophosphatidylcholine acyltransferase 1	-1.14415	3.93728	6.01478	0.0207542	0.437598
102723439	NA	LOC102723439	uncharacterized LOC102723439	1.01595	3.70932	6.01062	0.0207943	0.437598
146857	ENSG00000154760	SLFN13	schlafen family member 13	2.79079	1.17171	6.00911	0.0208089	0.437598
100507404	ENSG00000224533	TMLHE-AS1	TMLHE antisense RNA 1	2.96627	0.910794	6.00678	0.0208314	0.437598
10437	ENSG00000216490	IFI30	IFI30 lysosomal thiol reductase	-1.0987	8.49084	6.00529	0.0208458	0.437598
146771	ENSG00000240280	TCAM1P	testicular cell adhesion molecule 1, pseudogene	1.2689	3.17655	6.00211	0.0208764	0.437598
10276	ENSG00000173848	NET1	neuroepithelial cell transforming 1	-0.685971	6.61533	6.0021	0.0208766	0.437598
6161	ENSG00000144713	RPL32	ribosomal protein L32	0.763048	6.77921	6.00182	0.0208792	0.437598
5480	ENSG00000168938	PPIC	peptidylprolyl isomerase C	-0.974431	4.91238	6.0004	0.020893	0.437598
54815	ENSG00000167491	GATAD2A	GATA zinc finger domain containing 2A	-0.893414	4.55529	5.99489	0.0209464	0.437598
55759	ENSG00000138442	WDR12	WD repeat domain 12	1.28531	2.66539	5.99027	0.0209914	0.437598
83851	ENSG00000139973	SYT16	synaptotagmin 16	-3.89406	1.23473	6.10851	0.02104	0.437598
51398	ENSG00000105583	WDR83OS	WD repeat domain 83 opposite strand	0.704098	7.23869	5.97504	0.0211402	0.437598
1783	ENSG00000135720	DYNC1LI2	dynein cytoplasmic 1 light intermediate chain 2	-0.758629	6.34997	5.96656	0.0212234	0.437598
64420	ENSG00000106868	SUSD1	sushi domain containing 1	-1.25626	4.03354	5.95692	0.0213186	0.437598
150483	ENSG00000163060	TEKT4	tektin 4	-3.31519	1.0262	6.07375	0.0213698	0.437598
3315	ENSG00000106211	HSPB1	heat shock protein family B (small) member 1	-1.15069	7.82914	5.9514	0.0213733	0.437598
6337	ENSG00000111319	SCNN1A	sodium channel epithelial 1 subunit alpha	2.49826	0.844275	5.94647	0.0214223	0.437598
9562	ENSG00000107789	MINPP1	multiple inositol-polyphosphate phosphatase 1	-1.07712	4.86106	5.94283	0.0214586	0.437598
84268	ENSG00000129197	RPAIN	RPA interacting protein	0.727245	6.12454	5.9422	0.0214649	0.437598
5915	ENSG00000077092	RARB	retinoic acid receptor beta	-2.56196	2.24781	5.93526	0.0215342	0.437598
126374	ENSG00000142279	WTIP	WT1 interacting protein	-3.332	1.03048	6.05093	0.0215894	0.437598
4832	ENSG00000103024	NME3	NME/NM23 nucleoside diphosphate kinase 3	-1.92529	2.19165	5.92698	0.0216173	0.437598
85236	ENSG00000197903	H2BC12	H2B clustered histone 12	-0.941847	6.00379	5.92562	0.021631	0.437598
10054	ENSG00000126261	UBA2	ubiquitin like modifier activating enzyme 2	-0.782212	5.3042	5.92074	0.0216801	0.437598
6504	ENSG00000117090	SLAMF1	signaling lymphocytic activation molecule family member 1	1.96243	2.82533	5.91967	0.0216909	0.437598
2273	ENSG00000022267	FHL1	four and a half LIM domains 1	-0.965763	6.10319	5.91783	0.0217094	0.437598
1892	ENSG00000127884	ECHS1	enoyl-CoA hydratase, short chain 1	-1.32659	6.15522	5.91416	0.0217465	0.437598
4913	ENSG00000065057	NTHL1	nth like DNA glycosylase 1	-4.42726	1.47402	6.0296	0.021797	0.437598
199675	ENSG00000183019	MCEMP1	mast cell expressed membrane protein 1	2.65621	1.6174	5.90821	0.0218069	0.437598
57122	ENSG00000111581	NUP107	nucleoporin 107	-1.31276	4.8453	5.9057	0.0218323	0.437598
79002	ENSG00000123144	TRIR	telomerase RNA component interacting RNase	-0.872798	5.14377	5.90494	0.0218401	0.437598
105377866	NA	NA	NA	2.49083	1.15112	5.90491	0.0218403	0.437598
4128	ENSG00000189221	MAOA	monoamine oxidase A	-1.02946	8.2642	5.90199	0.0218701	0.437598
100271835	ENSG00000284337	LIMS3-LOC440895	LIMS3-LOC440895 readthrough	1.56629	3.46536	5.90089	0.0218812	0.437598
6693	ENSG00000197471	SPN	sialophorin	1.76365	2.06831	5.89799	0.0219108	0.437598
10218	ENSG00000171819	ANGPTL7	angiopoietin like 7	2.53573	0.673336	6.36985	0.0219542	0.437598
257177	ENSG00000188931	CFAP126	cilia and flagella associated protein 126	2.53573	0.673336	6.36985	0.0219542	0.437598
100189259	NA	TRE-CTC1-4	tRNA-Glu (anticodon CTC) 1-4	2.53573	0.673336	6.36985	0.0219542	0.437598
105373268	NA	NA	NA	2.53573	0.673336	6.36985	0.0219542	0.437598
100419868	NA	ZNF33BP1	zinc finger protein 33B pseudogene 1	2.53573	0.673336	6.36985	0.0219542	0.437598
100873779	ENSG00000199381	RNU6-79P	RNA, U6 small nuclear 79, pseudogene	2.53573	0.673336	6.36985	0.0219542	0.437598
105370548	NA	NA	NA	2.53573	0.673336	6.36985	0.0219542	0.437598
100189291	NA	TRL-AAG2-4	tRNA-Leu (anticodon AAG) 2-4	2.53573	0.673336	6.36985	0.0219542	0.437598
84290	ENSG00000256812	CAPNS2	calpain small subunit 2	2.53573	0.673336	6.36985	0.0219542	0.437598
28299	ENSG00000243466	IGKV1-5	immunoglobulin kappa variable 1-5	2.53573	0.673336	6.36985	0.0219542	0.437598
100506134	NA	TTC21B-AS1	TTC21B antisense RNA 1	2.53573	0.673336	6.36985	0.0219542	0.437598
101927374	NA	LOC101927374	uncharacterized LOC101927374	2.53573	0.673336	6.36985	0.0219542	0.437598
348840	ENSG00000291192	ANKRD18DP	ankyrin repeat domain 18D, pseudogene	2.53573	0.673336	6.36985	0.0219542	0.437598
643486	ENSG00000271209	BRDTP1	bromodomain testis associated pseudogene 1	2.53573	0.673336	6.36985	0.0219542	0.437598
10824	ENSG00000236256	DIAPH2-AS1	DIAPH2 antisense RNA 1	2.53573	0.673336	6.36985	0.0219542	0.437598
343263	ENSG00000221986	MYBPHL	myosin binding protein H like	2.57139	0.67636	6.30794	0.0219542	0.437598
100873949	ENSG00000231871	IPO9-AS1	IPO9 antisense RNA 1	2.57139	0.67636	6.30794	0.0219542	0.437598
2877	ENSG00000176153	GPX2	glutathione peroxidase 2	2.57139	0.67636	6.30794	0.0219542	0.437598
105372315	NA	ERVS71-1	endogenous retrovirus group S71 member 1, envelope	2.57139	0.67636	6.30794	0.0219542	0.437598
101927147	NA	NA	NA	2.57139	0.67636	6.30794	0.0219542	0.437598
100506275	ENSG00000206552	KRBOX1-AS1	KRBOX1 antisense RNA 1	2.57139	0.67636	6.30794	0.0219542	0.437598
100129354	NA	NRADDP	neurotrophin receptor associated death domain, pseudogene	2.57139	0.67636	6.30794	0.0219542	0.437598
677810	ENSG00000212588	SNORA26	small nucleolar RNA, H/ACA box 26	2.57139	0.67636	6.30794	0.0219542	0.437598
100506207	ENSG00000285219	LOC100506207	uncharacterized LOC100506207	2.57139	0.67636	6.30794	0.0219542	0.437598
100507547	ENSG00000284954	LOC100507547	uncharacterized LOC100507547	2.57139	0.67636	6.30794	0.0219542	0.437598
55340	ENSG00000196329	GIMAP5	GTPase, IMAP family member 5	2.57139	0.67636	6.30794	0.0219542	0.437598
54328	ENSG00000184194	GPR173	G protein-coupled receptor 173	2.57139	0.67636	6.30794	0.0219542	0.437598
199974	ENSG00000186160	CYP4Z1	cytochrome P450 family 4 subfamily Z member 1	2.6045	0.679081	6.23357	0.0219542	0.437598
100505502	ENSG00000285781	LOC100505502	POM121 transmembrane nucleoporin like, pseudogene	2.6045	0.679081	6.23357	0.0219542	0.437598
100129307	ENSG00000285746	LOC100129307	putative UPF0607 protein ENSP00000383144	2.6045	0.679081	6.23357	0.0219542	0.437598
100294362	ENSG00000263069	RNF213-AS1	RNF213 antisense RNA 1	2.6045	0.679081	6.23357	0.0219542	0.437598
100500862	ENSG00000275708	MIR3648-1	microRNA 3648-1	2.6045	0.679081	6.23357	0.0219542	0.437598
100873939	ENSG00000250930	LNX1-AS1	LNX1 antisense RNA 1	2.6045	0.679081	6.23357	0.0219542	0.437598
51617	ENSG00000170091	NSG2	neuronal vesicle trafficking associated 2	2.6045	0.679081	6.23357	0.0219542	0.437598
9051	ENSG00000140368	PSTPIP1	proline-serine-threonine phosphatase interacting protein 1	2.60997	0.679522	6.21947	0.0219542	0.437598
100507057	ENSG00000228109	MELTF-AS1	MELTF antisense RNA 1	2.60997	0.679522	6.21947	0.0219542	0.437598
58160	ENSG00000230257	NFE4	nuclear factor, erythroid 4	2.60997	0.679522	6.21947	0.0219542	0.437598
65243	ENSG00000187801	ZFP69B	ZFP69 zinc finger protein B	2.82239	0.698858	6.39202	0.0219542	0.437598
100189109	NA	TRR-TCT3-1	tRNA-Arg (anticodon TCT) 3-1	2.82239	0.698858	6.39202	0.0219542	0.437598
283455	ENSG00000171435	KSR2	kinase suppressor of ras 2	2.85781	0.70161	6.34027	0.0219542	0.437598
100507437	ENSG00000251602	MTA1-DT	MTA1 divergent transcript	2.85781	0.70161	6.34027	0.0219542	0.437598
100379571	NA	BACE1-AS	BACE1 antisense RNA	2.86369	0.702055	6.32995	0.0219542	0.437598
7197	NA	TRG-TCC1-1	tRNA-Gly (anticodon TCC) 1-1	2.86369	0.702055	6.32995	0.0219542	0.437598
105376906	NA	ERVK-19	endogenous retrovirus group K member 19, envelope	2.86369	0.702055	6.32995	0.0219542	0.437598
200350	ENSG00000184492	FOXD4L1	forkhead box D4 like 1	2.86369	0.702055	6.32995	0.0219542	0.437598
2298	ENSG00000170122	FOXD4	forkhead box D4	2.86369	0.702055	6.32995	0.0219542	0.437598
653404	ENSG00000273514	FOXD4L6	forkhead box D4 like 6	2.86369	0.702055	6.32995	0.0219542	0.437598
286380	ENSG00000187559	FOXD4L3	forkhead box D4 like 3	2.86369	0.702055	6.32995	0.0219542	0.437598
27198	ENSG00000196917	HCAR1	hydroxycarboxylic acid receptor 1	2.90267	0.705123	6.30151	0.0219542	0.437598
146433	ENSG00000157368	IL34	interleukin 34	2.90267	0.705123	6.30151	0.0219542	0.437598
644316	ENSG00000291012	FLJ43315	asparagine synthetase pseudogene	2.90267	0.705123	6.30151	0.0219542	0.437598
4237	ENSG00000117122	MFAP2	microfibril associated protein 2	-0.859584	5.73152	5.8931	0.0219608	0.437598
51084	ENSG00000165475	CRYL1	crystallin lambda 1	-2.06537	2.59376	5.88858	0.022007	0.438099
100996379	ENSG00000258488	LOC100996379	E3 ubiquitin-protein ligase HERC2	2.25985	1.3254	5.88699	0.0220233	0.438099
24142	ENSG00000243477	NAA80	N-alpha-acetyltransferase 80, NatH catalytic subunit	-3.46387	1.0725	6.00496	0.0220395	0.438099
79630	ENSG00000118292	C1orf54	chromosome 1 open reading frame 54	0.913293	6.70895	5.88462	0.0220477	0.438099
347	ENSG00000189058	APOD	apolipoprotein D	1.19269	9.07671	5.88167	0.022078	0.438143
29880	ENSG00000120697	ALG5	ALG5 dolichyl-phosphate beta-glucosyltransferase	-1.06612	5.42477	5.87926	0.0221028	0.438143
70	ENSG00000159251	ACTC1	actin alpha cardiac muscle 1	1.34292	4.2885	5.8785	0.0221106	0.438143
128102	NA	HSD3BP4	hydroxy-delta-5-steroid dehydrogenase, 3 beta, pseudogene 4	-1.51924	4.38649	5.87704	0.0221257	0.438143
6886	ENSG00000162367	TAL1	TAL bHLH transcription factor 1, erythroid differentiation factor	-3.86997	1.21021	5.99614	0.022127	0.438143
9569	ENSG00000006704	GTF2IRD1	GTF2I repeat domain containing 1	2.1974	1.60636	5.8741	0.022156	0.438349
147184	ENSG00000167920	KRT10-AS1	KRT10 antisense RNA 1	0.954985	4.01064	5.87279	0.0221695	0.438349
100873767	ENSG00000207518	RNU6-59P	RNA, U6 small nuclear 59, pseudogene	2.45441	0.842419	5.87063	0.0221918	0.438349
4636	ENSG00000215375	MYL5	myosin light chain 5	-4.08688	1.30499	5.98891	0.0221992	0.438349
64344	ENSG00000124440	HIF3A	hypoxia inducible factor 3 subunit alpha	0.957273	4.81348	5.8665	0.0222346	0.438744
10043	ENSG00000100284	TOM1	target of myb1 membrane trafficking protein	-1.0668	5.28392	5.85743	0.0223289	0.439001
51421	ENSG00000114019	AMOTL2	angiomotin like 2	-0.970842	4.70236	5.85741	0.0223291	0.439001
1474	ENSG00000175315	CST6	cystatin E/M	-2.63328	2.06739	5.85542	0.0223499	0.439001
7098	ENSG00000164342	TLR3	toll like receptor 3	-1.02655	4.43709	5.85366	0.0223682	0.439001
641700	ENSG00000249751	ECSCR	endothelial cell surface expressed chemotaxis and apoptosis regulator	1.12298	5.3986	5.85216	0.0223839	0.439001
729930	NA	LOC729930	intraflagellar transport associated protein pseudogene	1.2364	2.81986	5.85113	0.0223947	0.439001
342538	ENSG00000253506	NACA2	nascent polypeptide associated complex subunit alpha 2	0.737645	8.90416	5.8494	0.0224127	0.439001
57402	ENSG00000189334	S100A14	S100 calcium binding protein A14	-2.92558	1.70028	5.84847	0.0224224	0.439001
50485	ENSG00000138375	SMARCAL1	SWI/SNF related, matrix associated, actin dependent regulator of chromatin, subfamily a like 1	-0.88695	4.57677	5.84756	0.0224319	0.439001
285512	ENSG00000248019	FAM13A-AS1	FAM13A antisense RNA 1	1.4132	2.42473	5.84697	0.0224381	0.439001
27230	ENSG00000120742	SERP1	stress associated endoplasmic reticulum protein 1	-0.730377	5.58791	5.84525	0.0224562	0.439001
100463482	NA	MTRNR2L6	MT-RNR2 like 6 (pseudogene)	0.846007	4.39798	5.84486	0.0224603	0.439001
26869	ENSG00000207513	RNU1-3	RNA, U1 small nuclear 3	1.08628	3.69452	5.84456	0.0224634	0.439001
2797	ENSG00000125787	GNRH2	gonadotropin releasing hormone 2	-3.97192	1.26016	5.96176	0.022472	0.439001
5355	ENSG00000102007	PLP2	proteolipid protein 2	1.11003	3.38213	5.84301	0.0224796	0.439001
9318	ENSG00000166200	COPS2	COP9 signalosome subunit 2	-0.924805	5.46782	5.83947	0.0225168	0.439421
64777	ENSG00000145916	RMND5B	required for meiotic nuclear division 5 homolog B	-1.35602	2.9271	5.83802	0.0225321	0.439421
5955	ENSG00000117906	RCN2	reticulocalbin 2	-0.717213	6.338	5.83351	0.0225796	0.439558
440145	ENSG00000204899	MZT1	mitotic spindle organizing protein 1	-1.4037	2.99466	5.83327	0.0225821	0.439558
6228	ENSG00000186468	RPS23	ribosomal protein S23	0.94456	11.709	5.83162	0.0225995	0.439558
9073	ENSG00000156284	CLDN8	claudin 8	-2.15771	1.91446	5.83148	0.022601	0.439558
5379	NA	PMS2P1	PMS1 homolog 2, mismatch repair system component pseudogene 1	1.06532	3.67894	5.82804	0.0226373	0.439844
1843	ENSG00000120129	DUSP1	dual specificity phosphatase 1	-0.845673	7.01459	5.82716	0.0226467	0.439844
3097	ENSG00000010818	HIVEP2	HIVEP zinc finger 2	-1.35787	3.44413	5.82546	0.0226646	0.439892
10778	ENSG00000257267	ZNF271P	zinc finger protein 271, pseudogene	0.949474	4.44445	5.82252	0.0226957	0.440195
64083	ENSG00000113384	GOLPH3	golgi phosphoprotein 3	-0.785153	5.55824	5.81995	0.022723	0.440423
3887	ENSG00000205426	KRT81	keratin 81	-1.71118	3.47213	5.81812	0.0227424	0.440499
2938	ENSG00000243955	GSTA1	glutathione S-transferase alpha 1	1.16412	3.39079	5.81403	0.022786	0.441042
10588	ENSG00000136371	MTHFS	methenyltetrahydrofolate synthetase	-3.36002	1.81407	5.81156	0.0228123	0.441251
706	ENSG00000100300	TSPO	translocator protein	-2.11256	3.21993	5.80629	0.0228686	0.441936
64285	ENSG00000007384	RHBDF1	rhomboid 5 homolog 1	-0.953907	4.54477	5.80533	0.0228789	0.441936
58	ENSG00000143632	ACTA1	actin alpha 1, skeletal muscle	1.67085	2.45461	5.80365	0.0228969	0.441983
79836	ENSG00000175556	LONRF3	LON peptidase N-terminal domain and ring finger 3	2.91807	1.07063	5.80079	0.0229275	0.442274
7083	ENSG00000167900	TK1	thymidine kinase 1	0.808088	4.73328	5.79097	0.023033	0.442878
255394	ENSG00000166046	TCP11L2	t-complex 11 like 2	-1.06935	4.22238	5.78952	0.0230487	0.442878
8451	ENSG00000139842	CUL4A	cullin 4A	-1.0495	4.38132	5.78871	0.0230574	0.442878
25984	ENSG00000108244	KRT23	keratin 23	-0.822188	7.42694	5.78691	0.0230768	0.442878
6530	ENSG00000103546	SLC6A2	solute carrier family 6 member 2	-0.99947	5.9744	5.78404	0.0231079	0.442878
115362	ENSG00000154451	GBP5	guanylate binding protein 5	2.38557	2.33974	5.78216	0.0231281	0.442878
101927420	ENSG00000224046	DMTF1-AS1	DMTF1 antisense RNA 1	2.7029	0.868942	5.78045	0.0231467	0.442878
251	ENSG00000163286	ALPG	alkaline phosphatase, germ cell	-2.32029	2.11535	5.77997	0.0231519	0.442878
55735	ENSG00000007923	DNAJC11	DnaJ heat shock protein family (Hsp40) member C11	-1.42659	3.30959	5.77865	0.0231663	0.442878
283537	ENSG00000139508	SLC46A3	solute carrier family 46 member 3	-2.69008	1.60913	5.77731	0.0231808	0.442878
338	ENSG00000084674	APOB	apolipoprotein B	-4.05105	1.27234	5.89249	0.0231853	0.442878
387036	ENSG00000290474	GUSBP2	GUSB pseudogene 2	-1.68427	2.65691	5.77602	0.0231947	0.442878
23603	ENSG00000110880	CORO1C	coronin 1C	-0.900325	4.59118	5.77205	0.023238	0.442878
400242	ENSG00000235706	DICER1-AS1	DICER1 antisense RNA 1	2.45797	0.982197	5.77062	0.0232535	0.442878
200539	ENSG00000163126	ANKRD23	ankyrin repeat domain 23	-3.29347	1.02032	5.88495	0.0232645	0.442878
113000	ENSG00000007376	RPUSD1	RNA pseudouridine synthase domain containing 1	-3.66673	1.14417	5.87907	0.0233264	0.442878
171423	NA	PDIA3P1	protein disulfide isomerase family A member 3 pseudogene 1	-0.785536	6.96884	5.76239	0.0233434	0.442878
712	ENSG00000173372	C1QA	complement C1q A chain	0.847131	6.11531	5.76151	0.023353	0.442878
3796	ENSG00000068796	KIF2A	kinesin family member 2A	-0.807939	7.53045	5.76032	0.023366	0.442878
7093	ENSG00000095587	TLL2	tolloid like 2	2.67314	1.16442	5.75974	0.0233723	0.442878
10611	ENSG00000163110	PDLIM5	PDZ and LIM domain 5	-0.694689	6.4863	5.75493	0.0234251	0.442878
164668	ENSG00000100298	APOBEC3H	apolipoprotein B mRNA editing enzyme catalytic subunit 3H	2.16191	1.47115	5.75466	0.023428	0.442878
4689	ENSG00000100365	NCF4	neutrophil cytosolic factor 4	0.964597	4.56742	5.75427	0.0234323	0.442878
480	ENSG00000132681	ATP1A4	ATPase Na+/K+ transporting subunit alpha 4	-1.78017	3.68032	5.75207	0.0234565	0.442878
3459	ENSG00000027697	IFNGR1	interferon gamma receptor 1	-0.956522	6.24152	5.74899	0.0234904	0.442878
124402	ENSG00000153443	UBALD1	UBA like domain containing 1	-1.38126	3.15639	5.7454	0.0235299	0.442878
23228	ENSG00000154822	PLCL2	phospholipase C like 2	-0.807493	6.22661	5.74353	0.0235506	0.442878
5589	ENSG00000130175	PRKCSH	protein kinase C substrate 80K-H	-0.925126	5.56697	5.741	0.0235785	0.442878
401505	ENSG00000175768	TOMM5	translocase of outer mitochondrial membrane 5	0.741013	6.22697	5.73953	0.0235948	0.442878
5028	ENSG00000169860	P2RY1	purinergic receptor P2Y1	1.5527	2.25644	5.73915	0.023599	0.442878
5152	ENSG00000160191	PDE9A	phosphodiesterase 9A	-2.23953	2.77197	5.73508	0.0236441	0.442878
146894	ENSG00000161649	CD300LG	CD300 molecule like family member g	-1.16837	4.10667	5.7289	0.0237128	0.442878
6257	ENSG00000204231	RXRB	retinoid X receptor beta	-0.859974	4.63554	5.72613	0.0237436	0.442878
1456	ENSG00000151292	CSNK1G3	casein kinase 1 gamma 3	1.03271	3.81386	5.72387	0.0237688	0.442878
144535	ENSG00000188596	CFAP54	cilia and flagella associated protein 54	2.59124	1.30483	5.72136	0.0237969	0.442878
1327	ENSG00000131143	COX4I1	cytochrome c oxidase subunit 4I1	0.743936	9.25856	5.71915	0.0238215	0.442878
427	ENSG00000104763	ASAH1	N-acylsphingosine amidohydrolase 1	-0.997614	6.55825	5.71648	0.0238514	0.442878
3675	ENSG00000005884	ITGA3	integrin subunit alpha 3	-1.01178	4.61022	5.71554	0.023862	0.442878
26301	ENSG00000148288	GBGT1	globoside alpha-1,3-N-acetylgalactosaminyltransferase 1 (FORS blood group)	-2.08697	2.37747	5.71209	0.0239006	0.442878
132949	ENSG00000157426	AASDH	aminoadipate-semialdehyde dehydrogenase	0.809062	4.47195	5.7108	0.0239152	0.442878
29909	ENSG00000174946	GPR171	G protein-coupled receptor 171	1.749	2.26855	5.70691	0.0239589	0.442878
27238	ENSG00000068394	GPKOW	G-patch domain and KOW motifs	-1.00996	3.86123	5.70626	0.0239662	0.442878
10209	ENSG00000173812	EIF1	eukaryotic translation initiation factor 1	-0.861828	7.46874	5.70527	0.0239773	0.442878
55156	ENSG00000104442	ARMC1	armadillo repeat containing 1	-1.17228	3.51896	5.70525	0.0239775	0.442878
643834	ENSG00000229859	PGA3	pepsinogen A3	2.34475	1.90887	5.70335	0.0239989	0.442878
4052	ENSG00000049323	LTBP1	latent transforming growth factor beta binding protein 1	-0.831566	6.47777	5.70096	0.0240259	0.442878
54979	ENSG00000133328	PLAAT2	phospholipase A and acyltransferase 2	2.80837	0.877581	5.69863	0.0240523	0.442878
24141	ENSG00000125869	LAMP5	lysosomal associated membrane protein family member 5	2.80837	0.877581	5.69863	0.0240523	0.442878
1362	ENSG00000108582	CPD	carboxypeptidase D	-0.781621	5.72277	5.69744	0.0240658	0.442878
119032	ENSG00000166275	BORCS7	BLOC-1 related complex subunit 7	-0.997913	4.04748	5.69698	0.0240709	0.442878
6066	ENSG00000274585	RNU2-1	RNA, U2 small nuclear 1	0.817963	6.75069	5.69628	0.0240789	0.442878
9833	ENSG00000165304	MELK	maternal embryonic leucine zipper kinase	-2.03296	3.4021	5.69518	0.0240912	0.442878
63926	ENSG00000132623	ANKEF1	ankyrin repeat and EF-hand domain containing 1	-3.53622	1.10009	5.79963	0.0241813	0.442878
157567	ENSG00000186106	ANKRD46	ankyrin repeat domain 46	-1.10426	3.79279	5.68674	0.0241871	0.442878
389692	ENSG00000182759	MAFA	MAF bZIP transcription factor A	-3.6144	1.12949	5.79534	0.0242285	0.442878
51014	ENSG00000134970	TMED7	transmembrane p24 trafficking protein 7	-0.782608	5.38979	5.68136	0.0242484	0.442878
27065	ENSG00000168824	NSG1	neuronal vesicle trafficking associated 1	-0.963684	6.06156	5.67777	0.0242893	0.442878
84456	ENSG00000198945	L3MBTL3	L3MBTL histone methyl-lysine binding protein 3	-1.30993	3.35055	5.677	0.0242981	0.442878
53829	ENSG00000181631	P2RY13	purinergic receptor P2Y13	1.66508	2.19277	5.67493	0.0243217	0.442878
57679	ENSG00000003393	ALS2	alsin Rho guanine nucleotide exchange factor ALS2	-1.44265	3.24643	5.67453	0.0243264	0.442878
123036	ENSG00000165929	TC2N	tandem C2 domains, nuclear	-1.09102	4.23611	5.66845	0.024396	0.442878
253832	ENSG00000180776	ZDHHC20	zinc finger DHHC-type palmitoyltransferase 20	-0.928764	4.90199	5.66751	0.0244069	0.442878
56833	ENSG00000158714	SLAMF8	SLAM family member 8	1.58618	2.70893	5.66688	0.0244141	0.442878
148189	ENSG00000261824	LINC00662	long intergenic non-protein coding RNA 662	-3.52509	1.08743	5.77628	0.0244392	0.442878
101928100	ENSG00000245648	KLRK1-AS1	KLRK1 antisense RNA 1	2.36273	1.31519	5.66153	0.0244757	0.442878
283579	ENSG00000197734	C14orf178	chromosome 14 open reading frame 178	2.52062	0.856073	5.65913	0.0245033	0.442878
100169760	ENSG00000201321	RNA5S9	RNA, 5S ribosomal 9	1.52124	2.67649	5.6504	0.0246042	0.442878
8470	ENSG00000154556	SORBS2	sorbin and SH3 domain containing 2	0.910252	5.22371	5.64639	0.0246508	0.442878
151011	ENSG00000186522	SEPTIN10	septin 10	-0.821154	4.66679	5.64255	0.0246954	0.442878
1636	ENSG00000159640	ACE	angiotensin I converting enzyme	-3.95184	1.26188	5.74762	0.0247599	0.442878
9659	ENSG00000178104	PDE4DIP	phosphodiesterase 4D interacting protein	-0.739686	7.1684	5.6368	0.0247624	0.442878
150967	ENSG00000260804	LINC01963	long intergenic non-protein coding RNA 1963	-3.54804	1.10283	5.74708	0.024766	0.442878
285172	ENSG00000155744	HYCC2	hyccin PI4KA lipid kinase complex subunit 2	-0.894782	4.49737	5.63439	0.0247905	0.442878
105373468	NA	NA	NA	2.78463	0.695803	5.81528	0.0248102	0.442878
100189394	NA	TRL-CAG1-1	tRNA-Leu (anticodon CAG) 1-1	2.78463	0.695803	5.81528	0.0248102	0.442878
100189139	NA	TRL-CAG1-5	tRNA-Leu (anticodon CAG) 1-5	2.78463	0.695803	5.81528	0.0248102	0.442878
100189089	NA	TRL-CAG2-2	tRNA-Leu (anticodon CAG) 2-2	2.78463	0.695803	5.81528	0.0248102	0.442878
101928567	NA	LINC02087	long intergenic non-protein coding RNA 2087	2.78463	0.695803	5.81528	0.0248102	0.442878
6356	ENSG00000172156	CCL11	C-C motif chemokine ligand 11	2.78463	0.695803	5.81528	0.0248102	0.442878
100302650	NA	BABAM2-AS1	BABAM2 antisense RNA 1	2.78463	0.695803	5.81528	0.0248102	0.442878
2641	ENSG00000115263	GCG	glucagon	2.78463	0.695803	5.81528	0.0248102	0.442878
23066	ENSG00000144712	CAND2	cullin associated and neddylation dissociated 2 (putative)	2.78463	0.695803	5.81528	0.0248102	0.442878
201633	ENSG00000181847	TIGIT	T cell immunoreceptor with Ig and ITIM domains	2.78463	0.695803	5.81528	0.0248102	0.442878
2895	ENSG00000152208	GRID2	glutamate ionotropic receptor delta type subunit 2	2.78463	0.695803	5.81528	0.0248102	0.442878
100533182	ENSG00000247950	SEC24B-AS1	SEC24B antisense RNA 1	2.78463	0.695803	5.81528	0.0248102	0.442878
285780	ENSG00000216863	LY86-AS1	LY86 antisense RNA 1	2.78463	0.695803	5.81528	0.0248102	0.442878
100189288	NA	TRL-CAG1-7	tRNA-Leu (anticodon CAG) 1-7	2.78463	0.695803	5.81528	0.0248102	0.442878
724068	ENSG00000234178	DEFA11P	defensin alpha 11, pseudogene	2.78463	0.695803	5.81528	0.0248102	0.442878
6363	ENSG00000172724	CCL19	C-C motif chemokine ligand 19	2.78463	0.695803	5.81528	0.0248102	0.442878
9083	ENSG00000183753	BPY2	basic charge Y-linked 2	2.78463	0.695803	5.81528	0.0248102	0.442878
442867	ENSG00000183795	BPY2B	basic charge Y-linked 2B	2.78463	0.695803	5.81528	0.0248102	0.442878
442868	ENSG00000185894	BPY2C	basic charge Y-linked 2C	2.78463	0.695803	5.81528	0.0248102	0.442878
3604	ENSG00000049249	TNFRSF9	TNF receptor superfamily member 9	2.83623	1.04097	5.62945	0.0248483	0.442878
101927884	ENSG00000231172	EVA1A-AS	EVA1A antisense RNA	2.46155	0.83408	5.6279	0.0248666	0.442878
6404	ENSG00000110876	SELPLG	selectin P ligand	1.52752	2.36185	5.62565	0.0248929	0.442878
84171	ENSG00000138131	LOXL4	lysyl oxidase like 4	-3.45694	1.07022	5.73334	0.0249214	0.442878
54583	ENSG00000135766	EGLN1	egl-9 family hypoxia inducible factor 1	-1.30088	2.98288	5.62024	0.0249566	0.442878
144717	ENSG00000198324	PHETA1	PH domain containing endocytic trafficking adaptor 1	-1.34565	2.97877	5.6187	0.0249747	0.442878
3678	ENSG00000161638	ITGA5	integrin subunit alpha 5	-1.02256	7.13909	5.61772	0.0249862	0.442878
200734	ENSG00000198369	SPRED2	sprouty related EVH1 domain containing 2	-2.06812	1.97834	5.61458	0.0250233	0.442878
10513	ENSG00000062725	APPBP2	amyloid beta precursor protein binding protein 2	-0.809584	5.62148	5.61364	0.0250343	0.442878
51560	ENSG00000154917	RAB6B	RAB6B, member RAS oncogene family	-1.39126	3.70071	5.61087	0.0250672	0.442878
8189	ENSG00000125755	SYMPK	symplekin scaffold protein	-1.22241	4.02793	5.60974	0.0250805	0.442878
23233	ENSG00000144036	EXOC6B	exocyst complex component 6B	-0.78551	7.06613	5.60734	0.0251089	0.442878
100507299	NA	SMC5-DT	SMC5 divergent transcript	-3.41661	1.05967	5.71331	0.02515	0.442878
2000	ENSG00000102034	ELF4	E74 like ETS transcription factor 4	-1.55973	2.72274	5.60319	0.0251582	0.442878
102723167	ENSG00000265142	MIR133A1HG	MIR133A1 host gene	2.47935	0.8538	5.60023	0.0251933	0.442878
10994	ENSG00000105135	ILVBL	ilvB acetolactate synthase like	-1.21983	4.03932	5.59943	0.0252028	0.442878
92241	ENSG00000198771	RCSD1	RCSD domain containing 1	1.06911	3.41429	5.59507	0.0252547	0.442878
3613	ENSG00000141401	IMPA2	inositol monophosphatase 2	-1.29384	5.43601	5.59277	0.0252822	0.442878
4314	ENSG00000149968	MMP3	matrix metallopeptidase 3	2.86069	0.701919	5.77131	0.0253014	0.442878
23017	ENSG00000135472	FAIM2	Fas apoptotic inhibitory molecule 2	2.86069	0.701919	5.77131	0.0253014	0.442878
89874	ENSG00000183032	SLC25A21	solute carrier family 25 member 21	2.86069	0.701919	5.77131	0.0253014	0.442878
7703	ENSG00000277258	PCGF2	polycomb group ring finger 2	2.86069	0.701919	5.77131	0.0253014	0.442878
84658	ENSG00000131355	ADGRE3	adhesion G protein-coupled receptor E3	2.86069	0.701919	5.77131	0.0253014	0.442878
101927934	ENSG00000251169	LINC01843	long intergenic non-protein coding RNA 1843	2.86069	0.701919	5.77131	0.0253014	0.442878
404203	ENSG00000178172	SPINK6	serine peptidase inhibitor Kazal type 6	2.86069	0.701919	5.77131	0.0253014	0.442878
100189348	NA	TRI-TAT3-1	tRNA-Ile (anticodon TAT) 3-1	2.86069	0.701919	5.77131	0.0253014	0.442878
389383	ENSG00000196748	CLPSL2	colipase like 2	2.86069	0.701919	5.77131	0.0253014	0.442878
54839	ENSG00000137821	LRRC49	leucine rich repeat containing 49	-4.91988	1.69054	5.69964	0.0253073	0.442878
57539	ENSG00000118965	WDR35	WD repeat domain 35	-4.46926	1.48892	5.69852	0.0253202	0.442878
729171	ENSG00000229089	ANKRD20A8P	ankyrin repeat domain 20 family member A8, pseudogene	1.51606	2.92365	5.58689	0.0253526	0.442878
91978	ENSG00000141933	TPGS1	tubulin polyglutamylase complex subunit 1	-3.91384	1.24227	5.69403	0.0253722	0.442878
200958	ENSG00000176945	MUC20	mucin 20, cell surface associated	-1.65359	2.74504	5.58081	0.0254255	0.442878
220832	ENSG00000241735	FABP5P3	fatty acid binding protein 5 pseudogene 3	-2.21244	1.83116	5.57902	0.025447	0.442878
100873758	ENSG00000207072	RNU6-39P	RNA, U6 small nuclear 39, pseudogene	1.50422	2.79007	5.57601	0.0254833	0.442878
51651	ENSG00000141378	PTRH2	peptidyl-tRNA hydrolase 2	0.896362	4.90479	5.57517	0.0254933	0.442878
56886	ENSG00000136731	UGGT1	UDP-glucose glycoprotein glucosyltransferase 1	-0.767571	6.89395	5.57392	0.0255084	0.442878
139341	ENSG00000069509	FUNDC1	FUN14 domain containing 1	0.798157	4.3215	5.5723	0.025528	0.442878
57129	ENSG00000136522	MRPL47	mitochondrial ribosomal protein L47	0.788147	7.1113	5.56843	0.0255747	0.442878
6373	ENSG00000169248	CXCL11	C-X-C motif chemokine ligand 11	2.71439	1.48741	5.56727	0.0255888	0.442878
221400	ENSG00000180113	TDRD6	tudor domain containing 6	2.3405	0.971354	5.56315	0.0256387	0.442878
5069	ENSG00000182752	PAPPA	pappalysin 1	-1.21843	12.3222	5.56038	0.0256723	0.442878
84148	ENSG00000103510	KAT8	lysine acetyltransferase 8	-1.21479	3.6643	5.5593	0.0256854	0.442878
105375355	ENSG00000243566	UPK3B	uroplakin 3B	2.42831	0.984347	5.55672	0.0257168	0.442878
51690	ENSG00000130332	LSM7	LSM7 homolog, U6 small nuclear RNA and mRNA degradation associated	-1.56687	3.85501	5.55657	0.0257186	0.442878
653082	ENSG00000206077	ZDHHC11B	zinc finger DHHC-type containing 11B	-3.19942	0.990443	5.66325	0.0257315	0.442878
10799	ENSG00000124787	RPP40	ribonuclease P/MRP subunit p40	-1.65176	3.33549	5.55336	0.0257577	0.442878
29895	ENSG00000180209	MYL11	myosin light chain 11	-3.56738	1.11651	5.6577	0.0257968	0.442878
5792	ENSG00000142949	PTPRF	protein tyrosine phosphatase receptor type F	-0.795015	6.6925	5.54973	0.025802	0.442878
5500	ENSG00000213639	PPP1CB	protein phosphatase 1 catalytic subunit beta	-0.762906	6.69436	5.54946	0.0258052	0.442878
6385	ENSG00000124145	SDC4	syndecan 4	-0.779554	5.43679	5.54488	0.0258613	0.442878
5865	ENSG00000169213	RAB3B	RAB3B, member RAS oncogene family	-1.10926	6.43411	5.53791	0.0259467	0.442878
8773	ENSG00000092531	SNAP23	synaptosome associated protein 23	-0.716765	6.79412	5.53674	0.0259612	0.442878
84061	ENSG00000102158	MAGT1	magnesium transporter 1	-0.768074	6.40962	5.53508	0.0259815	0.442878
85480	ENSG00000145777	TSLP	thymic stromal lymphopoietin	2.93329	0.707439	5.70971	0.0260078	0.442878
100133036	ENSG00000290718	FAM95B1	family with sequence similarity 95 member B1	2.93329	0.707439	5.70971	0.0260078	0.442878
23254	ENSG00000189337	KAZN	kazrin, periplakin interacting protein	-0.867298	5.45566	5.53021	0.0260416	0.442878
8655	ENSG00000088986	DYNLL1	dynein light chain LC8-type 1	0.723919	7.84166	5.52919	0.0260542	0.442878
80835	ENSG00000173662	TAS1R1	taste 1 receptor member 1	2.292	0.650999	5.70541	0.0260579	0.442878
1325	ENSG00000241563	CORT	cortistatin	2.292	0.650999	5.70541	0.0260579	0.442878
348378	ENSG00000182183	SHISAL2A	shisa like 2A	2.292	0.650999	5.70541	0.0260579	0.442878
126820	ENSG00000162643	DNAI3	dynein axonemal intermediate chain 3	2.292	0.650999	5.70541	0.0260579	0.442878
101928846	ENSG00000235527	HIPK1-AS1	HIPK1 antisense RNA 1	2.292	0.650999	5.70541	0.0260579	0.442878
100874270	ENSG00000230921	HAO2-IT1	HAO2 intronic transcript 1	2.292	0.650999	5.70541	0.0260579	0.442878
142683	ENSG00000158764	ITLN2	intelectin 2	2.292	0.650999	5.70541	0.0260579	0.442878
27184	NA	DISC2	disrupted in schizophrenia 2	2.292	0.650999	5.70541	0.0260579	0.442878
387638	NA	NA	NA	2.292	0.650999	5.70541	0.0260579	0.442878
414245	ENSG00000236756	DNAJC9-AS1	DNAJC9 and MRPS16 antisense RNA 1	2.292	0.650999	5.70541	0.0260579	0.442878
105378579	NA	NA	NA	2.292	0.650999	5.70541	0.0260579	0.442878
387742	ENSG00000205866	FAM99A	family with sequence similarity 99 member A	2.292	0.650999	5.70541	0.0260579	0.442878
340980	ENSG00000187747	OR52B6	olfactory receptor family 52 subfamily B member 6	2.292	0.650999	5.70541	0.0260579	0.442878
102723895	ENSG00000256422	LINC02552	long intergenic non-protein coding RNA 2552	2.292	0.650999	5.70541	0.0260579	0.442878
89944	ENSG00000149328	GLB1L2	galactosidase beta 1 like 2	2.292	0.650999	5.70541	0.0260579	0.442878
2735	ENSG00000111087	GLI1	GLI family zinc finger 1	2.292	0.650999	5.70541	0.0260579	0.442878
105378254	NA	NA	NA	2.292	0.650999	5.70541	0.0260579	0.442878
101928597	ENSG00000246394	ZNF84-DT	ZNF84 divergent transcript	2.292	0.650999	5.70541	0.0260579	0.442878
100507135	ENSG00000120664	SPART-AS1	SPART antisense RNA 1	2.292	0.650999	5.70541	0.0260579	0.442878
100874150	NA	LINC00379	long intergenic non-protein coding RNA 379	2.292	0.650999	5.70541	0.0260579	0.442878
102725509	NA	LINC01232	long intergenic non-protein coding RNA 1232	2.292	0.650999	5.70541	0.0260579	0.442878
4625	ENSG00000092054	MYH7	myosin heavy chain 7	2.292	0.650999	5.70541	0.0260579	0.442878
100033435	ENSG00000207279	SNORD116-24	small nucleolar RNA, C/D box 116-24	2.292	0.650999	5.70541	0.0260579	0.442878
100129396	ENSG00000288235	FAM106C	family with sequence similarity 106 member C	2.292	0.650999	5.70541	0.0260579	0.442878
100996259	NA	FAM106B	family with sequence similarity 106 member B	2.292	0.650999	5.70541	0.0260579	0.442878
79170	ENSG00000167183	PRR15L	proline rich 15 like	2.292	0.650999	5.70541	0.0260579	0.442878
100287082	ENSG00000265962	GACAT2	gastric cancer associated transcript 2	2.292	0.650999	5.70541	0.0260579	0.442878
80122	ENSG00000176601	MAP3K19	mitogen-activated protein kinase kinase kinase 19	2.292	0.650999	5.70541	0.0260579	0.442878
83959	ENSG00000088836	SLC4A11	solute carrier family 4 member 11	2.292	0.650999	5.70541	0.0260579	0.442878
149773	ENSG00000231290	APCDD1L-DT	APCDD1L divergent transcript	2.292	0.650999	5.70541	0.0260579	0.442878
27156	ENSG00000100218	RSPH14	radial spoke head 14 homolog	2.292	0.650999	5.70541	0.0260579	0.442878
166348	ENSG00000187715	KBTBD12	kelch repeat and BTB domain containing 12	2.292	0.650999	5.70541	0.0260579	0.442878
100874244	NA	NAALADL2-AS2	NAALADL2 antisense RNA 2	2.292	0.650999	5.70541	0.0260579	0.442878
5522	ENSG00000074211	PPP2R2C	protein phosphatase 2 regulatory subunit Bgamma	2.292	0.650999	5.70541	0.0260579	0.442878
101928893	NA	LOC101928893	uncharacterized LOC101928893	2.292	0.650999	5.70541	0.0260579	0.442878
641518	ENSG00000232021	LEF1-AS1	LEF1 antisense RNA 1	2.292	0.650999	5.70541	0.0260579	0.442878
353189	ENSG00000173930	SLCO4C1	solute carrier organic anion transporter family member 4C1	2.292	0.650999	5.70541	0.0260579	0.442878
442211	NA	ATP6V0CP3	ATPase H+ transporting V0 subunit c pseudogene 3	2.292	0.650999	5.70541	0.0260579	0.442878
1310	ENSG00000082293	COL19A1	collagen type XIX alpha 1 chain	2.292	0.650999	5.70541	0.0260579	0.442878
100271873	ENSG00000268257	AIRN	antisense of IGF2R non-protein coding RNA	2.292	0.650999	5.70541	0.0260579	0.442878
168507	ENSG00000158683	PKD1L1	polycystin 1 like 1, transient receptor potential channel interacting	2.292	0.650999	5.70541	0.0260579	0.442878
100653233	ENSG00000260653	MIR3147HG	MIR3147 host gene	2.292	0.650999	5.70541	0.0260579	0.442878
136242	ENSG00000165076	PRSS37	serine protease 37	2.292	0.650999	5.70541	0.0260579	0.442878
100189177	NA	TRC-GCA19-1	tRNA-Cys (anticodon GCA) 19-1	2.292	0.650999	5.70541	0.0260579	0.442878
10361	ENSG00000158806	NPM2	nucleophosmin/nucleoplasmin 2	2.292	0.650999	5.70541	0.0260579	0.442878
101926926	ENSG00000250295	RDH10-AS1	RDH10 antisense RNA 1	2.292	0.650999	5.70541	0.0260579	0.442878
401546	ENSG00000188959	C9orf152	chromosome 9 open reading frame 152	2.292	0.650999	5.70541	0.0260579	0.442878
80789	ENSG00000185085	INTS5	integrator complex subunit 5	-1.60432	2.61968	5.52888	0.026058	0.442878
64208	ENSG00000132429	POPDC3	popeye domain containing 3	-3.38346	1.05124	5.63306	0.0260894	0.442878
57190	ENSG00000162430	SELENON	selenoprotein N	-1.05989	3.94736	5.52513	0.0261044	0.442878
911	ENSG00000158481	CD1C	CD1c molecule	2.9455	0.708335	5.69729	0.026153	0.442878
388289	NA	NA	NA	2.9455	0.708335	5.69729	0.026153	0.442878
7146	NA	TNXA	tenascin XA (pseudogene)	2.9455	0.708335	5.69729	0.026153	0.442878
104266958	NA	LINC01151	long intergenic non-protein coding RNA 1151	2.9455	0.708335	5.69729	0.026153	0.442878
246119	ENSG00000229236	TTTY10	testis expressed transcript, Y-linked 10	2.9455	0.708335	5.69729	0.026153	0.442878
83445	ENSG00000111305	GSG1	germ cell associated 1	2.36419	0.83052	5.51933	0.0261762	0.442878
10566	ENSG00000111254	AKAP3	A-kinase anchoring protein 3	-3.3949	1.05429	5.62502	0.0261857	0.442878
55655	ENSG00000022556	NLRP2	NLR family pyrin domain containing 2	-0.950948	5.82357	5.51842	0.0261874	0.442878
84460	ENSG00000166432	ZMAT1	zinc finger matrin-type 1	2.20935	1.18205	5.51674	0.0262084	0.442968
55791	ENSG00000121931	LRIF1	ligand dependent nuclear receptor interacting factor 1	-0.789149	5.40422	5.5119	0.0262686	0.443573
11316	ENSG00000105669	COPE	COPI coat complex subunit epsilon	-1.8992	4.6922	5.51135	0.0262754	0.443573
117178	ENSG00000117155	SSX2IP	SSX family member 2 interacting protein	1.53514	2.63067	5.50364	0.0263716	0.444933
100462953	NA	MICOS10P1	MICOS10 pseudogene 1	1.4714	2.67642	5.49855	0.0264355	0.445745
55585	ENSG00000160714	UBE2Q1	ubiquitin conjugating enzyme E2 Q1	-0.712283	5.43322	5.49446	0.0264868	0.446346
50853	ENSG00000136059	VILL	villin like	-3.42267	1.0612	5.59236	0.0265807	0.447662
6095	ENSG00000069667	RORA	RAR related orphan receptor A	-1.10816	3.98976	5.4853	0.0266022	0.447759
84690	ENSG00000141255	SPATA22	spermatogenesis associated 22	-3.82884	1.20711	5.58636	0.026654	0.448366
6885	ENSG00000135341	MAP3K7	mitogen-activated protein kinase kinase kinase 7	-0.937811	3.88901	5.47674	0.0267105	0.44905
64063	ENSG00000005001	PRSS22	serine protease 22	-2.56732	1.3995	5.47116	0.0267814	0.44912
55835	ENSG00000151849	CENPJ	centromere protein J	1.71036	2.34957	5.47081	0.0267859	0.44912
94121	ENSG00000102362	SYTL4	synaptotagmin like 4	1.47901	2.7654	5.47008	0.0267952	0.44912
23553	ENSG00000106302	HYAL4	hyaluronidase 4	-2.76712	1.61781	5.46994	0.026797	0.44912
6799	ENSG00000197165	SULT1A2	sulfotransferase family 1A member 2	1.56266	2.53494	5.46766	0.026826	0.44912
10099	ENSG00000140391	TSPAN3	tetraspanin 3	-0.739577	5.33458	5.46679	0.0268371	0.44912
54602	ENSG00000102471	NDFIP2	Nedd4 family interacting protein 2	-0.78905	5.62534	5.46673	0.0268378	0.44912
3913	ENSG00000172037	LAMB2	laminin subunit beta 2	-0.960146	4.47254	5.46647	0.0268412	0.44912
27145	ENSG00000118407	FILIP1	filamin A interacting protein 1	1.32993	3.121	5.46493	0.0268608	0.44917
39	ENSG00000120437	ACAT2	acetyl-CoA acetyltransferase 2	1.20651	4.44385	5.46376	0.0268759	0.44917
9110	ENSG00000108389	MTMR4	myotubularin related protein 4	-0.95704	5.43206	5.45985	0.0269258	0.449741
51241	ENSG00000133983	COX16	cytochrome c oxidase assembly factor COX16	0.748922	5.29352	5.45797	0.0269499	0.449878
83592	ENSG00000165568	AKR1E2	aldo-keto reductase family 1 member E2	-4.02655	1.27621	5.56072	0.0269698	0.449942
8796	ENSG00000136155	SCEL	sciellin	2.34086	0.989141	5.4552	0.0269854	0.449942
6632	ENSG00000167088	SNRPD1	small nuclear ribonucleoprotein D1 polypeptide	0.768408	4.89522	5.44967	0.0270565	0.450513
5584	ENSG00000163558	PRKCI	protein kinase C iota	0.899359	4.16857	5.44955	0.027058	0.450513
101929733	ENSG00000271952	LINC01954	long intergenic non-protein coding RNA 1954	2.70793	1.03148	5.44855	0.0270708	0.450513
246182	NA	AKR7A2P1	AKR7A2 pseudogene 1	-3.3971	1.0554	5.5516	0.0270831	0.450513
26834	ENSG00000202538	RNU4-2	RNA, U4 small nuclear 2	1.44176	2.56341	5.44386	0.0271313	0.450921
285141	ENSG00000204334	ERICH2	glutamate rich 2	-3.37734	1.04947	5.54708	0.0271394	0.450921
741	ENSG00000174276	ZNHIT2	zinc finger HIT-type containing 2	-3.29092	1.02058	5.54549	0.0271593	0.450987
714	ENSG00000159189	C1QC	complement C1q C chain	0.889468	5.03189	5.44023	0.0271782	0.451037
4103	ENSG00000147381	MAGEA4	MAGE family member A4	1.61573	3.51975	5.43591	0.0272342	0.451488
29101	ENSG00000160075	SSU72	SSU72 homolog, RNA polymerase II CTD phosphatase	-0.926423	4.822	5.43568	0.0272371	0.451488
123	ENSG00000147872	PLIN2	perilipin 2	-0.950456	9.2507	5.43167	0.0272892	0.451865
7204	ENSG00000038382	TRIO	trio Rho guanine nucleotide exchange factor	-0.933121	4.01331	5.43148	0.0272917	0.451865
9122	ENSG00000168679	SLC16A4	solute carrier family 16 member 4	-0.921453	7.36444	5.42921	0.0273212	0.451945
56963	ENSG00000182175	RGMA	repulsive guidance molecule BMP co-receptor a	2.58012	1.02705	5.42865	0.0273284	0.451945
10955	ENSG00000132824	SERINC3	serine incorporator 3	-0.763421	7.81412	5.42733	0.0273457	0.451948
567	ENSG00000166710	B2M	beta-2-microglobulin	0.980414	11.4635	5.42223	0.0274121	0.451948
93594	ENSG00000156787	TBC1D31	TBC1 domain family member 31	2.46542	1.69857	5.42209	0.027414	0.451948
100506388	ENSG00000262061	RPH3AL-AS1	RPH3AL antisense RNA 1	1.60393	2.9161	5.42071	0.027432	0.451948
2857	ENSG00000171659	GPR34	G protein-coupled receptor 34	1.09792	4.75259	5.42033	0.0274369	0.451948
4015	ENSG00000113083	LOX	lysyl oxidase	1.95069	1.99061	5.42022	0.0274384	0.451948
57192	ENSG00000090674	MCOLN1	mucolipin TRP cation channel 1	-2.00497	2.84518	5.4201	0.02744	0.451948
659	ENSG00000204217	BMPR2	bone morphogenetic protein receptor type 2	-0.726992	6.4614	5.41634	0.0274891	0.452362
7534	ENSG00000164924	YWHAZ	tyrosine 3-monooxygenase/tryptophan 5-monooxygenase activation protein zeta	-0.688126	7.33271	5.41572	0.0274972	0.452362
9716	ENSG00000021776	AQR	aquarius intron-binding spliceosomal factor	0.831282	5.28046	5.41307	0.027532	0.452362
10288	ENSG00000131042	LILRB2	leukocyte immunoglobulin like receptor B2	1.81325	2.08383	5.41223	0.027543	0.452362
5493	ENSG00000118898	PPL	periplakin	-1.62767	3.00754	5.4121	0.0275448	0.452362
1809	ENSG00000113657	DPYSL3	dihydropyrimidinase like 3	1.48488	2.89139	5.40362	0.0276562	0.453929
101927755	ENSG00000267302	RNFT1-DT	RNFT1 divergent transcript	1.8699	1.83161	5.40089	0.0276923	0.45426
1379	ENSG00000197721	CR1L	complement C3b/C4b receptor 1 like	2.12452	2.14942	5.39881	0.0277198	0.454273
801	ENSG00000198668	CALM1	calmodulin 1	-0.776913	8.58762	5.3984	0.0277251	0.454273
170626	ENSG00000171402	XAGE3	X antigen family member 3	0.894067	11.4169	5.39353	0.0277896	0.455059
79656	ENSG00000162373	BEND5	BEN domain containing 5	-3.87681	1.20304	5.49378	0.027814	0.455059
51816	ENSG00000093072	ADA2	adenosine deaminase 2	1.52558	2.48363	5.39043	0.0278307	0.455059
79101	ENSG00000166012	TAF1D	TATA-box binding protein associated factor, RNA polymerase I subunit D	0.670178	6.4866	5.38994	0.0278372	0.455059
100130097	NA	KIF28P	kinesin family member 28, pseudogene	2.17342	1.59753	5.38705	0.0278757	0.455275
65982	ENSG00000121413	ZSCAN18	zinc finger and SCAN domain containing 18	-0.960404	5.1118	5.38654	0.0278825	0.455275
3560	ENSG00000100385	IL2RB	interleukin 2 receptor subunit beta	-1.67974	2.96094	5.38331	0.0279254	0.455713
60682	ENSG00000112305	SMAP1	small ArfGAP 1	-1.07057	4.15808	5.38205	0.0279423	0.455727
3123	ENSG00000196126	HLA-DRB1	major histocompatibility complex, class II, DR beta 1	1.44063	3.7536	5.38037	0.0279647	0.455831
51232	ENSG00000150938	CRIM1	cysteine rich transmembrane BMP regulator 1	-0.817621	9.3012	5.37473	0.02804	0.45664
56937	ENSG00000124225	PMEPA1	prostate transmembrane protein, androgen induced 1	-2.83681	1.52611	5.37425	0.0280465	0.45664
3727	ENSG00000130522	JUND	JunD proto-oncogene, AP-1 transcription factor subunit	-0.773665	6.69418	5.37225	0.0280732	0.456813
5222	ENSG00000256713	PGA5	pepsinogen A5	2.23462	1.88983	5.36823	0.0281272	0.457177
647012	NA	YY1P2	YY1 transcription factor pseudogene 2	-2.51692	1.51476	5.36819	0.0281278	0.457177
100505738	ENSG00000247516	MIR4458HG	MIR4458 host gene	1.33104	3.57284	5.36562	0.0281623	0.457477
2530	ENSG00000033170	FUT8	fucosyltransferase 8	-0.93554	5.27639	5.3638	0.0281868	0.457604
2868	ENSG00000125388	GRK4	G protein-coupled receptor kinase 4	-4.33993	1.41192	5.46363	0.0282038	0.457604
29015	ENSG00000134802	SLC43A3	solute carrier family 43 member 3	1.83783	2.52811	5.36144	0.0282185	0.457604
84138	ENSG00000103061	SLC7A6OS	solute carrier family 7 member 6 opposite strand	-3.62555	1.13315	5.46116	0.028236	0.457626
26871	ENSG00000206652	RNU1-1	RNA, U1 small nuclear 1	1.17478	3.80486	5.35661	0.0282838	0.458054
7869	ENSG00000012171	SEMA3B	semaphorin 3B	-1.03043	8.10631	5.3558	0.0282946	0.458054
6451	ENSG00000131171	SH3BGRL	SH3 domain binding glutamate rich protein like	0.785119	6.15939	5.35431	0.0283148	0.458119
100130460	NA	CAND1.11	uncharacterized LOC100130460	2.33946	0.833658	5.35092	0.0283608	0.458596
100505592	ENSG00000266835	GAPLINC	gastric adenocarcinoma associated, positive CD44 regulator, long intergenic non-coding RNA	1.42428	3.6541	5.34975	0.0283766	0.458596
1476	ENSG00000160213	CSTB	cystatin B	-1.10934	5.14487	5.34606	0.0284267	0.459145
7086	ENSG00000163931	TKT	transketolase	-0.700633	7.07473	5.34345	0.0284622	0.459247
6001	ENSG00000148908	RGS10	regulator of G protein signaling 10	0.987075	5.36238	5.34321	0.0284654	0.459247
10333	ENSG00000174130	TLR6	toll like receptor 6	2.66164	1.173	5.34136	0.0284906	0.459393
6352	ENSG00000271503	CCL5	C-C motif chemokine ligand 5	1.6236	3.34889	5.33305	0.0286041	0.460957
151888	ENSG00000186265	BTLA	B and T lymphocyte associated	2.14742	1.53275	5.33189	0.0286201	0.460957
84057	ENSG00000121211	MND1	meiotic nuclear divisions 1	1.48329	3.11008	5.32761	0.0286787	0.461639
30846	ENSG00000024422	EHD2	EH domain containing 2	0.939827	4.37092	5.32424	0.028725	0.461732
3965	ENSG00000168961	LGALS9	galectin 9	1.19632	3.87911	5.32402	0.028728	0.461732
133383	ENSG00000155542	SETD9	SET domain containing 9	-1.99893	2.5517	5.32364	0.0287332	0.461732
1043	ENSG00000169442	CD52	CD52 molecule	1.57563	3.06094	5.32205	0.0287551	0.461822
5191	ENSG00000112357	PEX7	peroxisomal biogenesis factor 7	-2.06185	2.2592	5.31621	0.0288356	0.462439
10728	ENSG00000110958	PTGES3	prostaglandin E synthase 3	-0.712607	6.23173	5.31512	0.0288507	0.462439
688	ENSG00000102554	KLF5	KLF transcription factor 5	-1.02244	5.24237	5.31485	0.0288544	0.462439
100506211	ENSG00000247095	MIR210HG	MIR210 host gene	-3.31021	1.02545	5.41402	0.0288587	0.462439
89958	ENSG00000186193	SAPCD2	suppressor APC domain containing 2	-3.48058	1.08488	5.41172	0.0288894	0.462671
975	ENSG00000110651	CD81	CD81 molecule	-1.16885	4.15746	5.311	0.0289076	0.462701
79023	ENSG00000075188	NUP37	nucleoporin 37	0.729024	5.86309	5.30834	0.0289444	0.46284
51094	ENSG00000159346	ADIPOR1	adiponectin receptor 1	-0.804323	5.34043	5.30604	0.0289764	0.46284
3945	ENSG00000111716	LDHB	lactate dehydrogenase B	0.715033	6.93248	5.30495	0.0289915	0.46284
338699	ENSG00000137494	ANKRD42	ankyrin repeat domain 42	1.04259	3.55728	5.30453	0.0289973	0.46284
83443	ENSG00000169976	SF3B5	splicing factor 3b subunit 5	0.717611	5.95116	5.3045	0.0289978	0.46284
1588	ENSG00000137869	CYP19A1	cytochrome P450 family 19 subfamily A member 1	-1.26886	11.425	5.30074	0.02905	0.463296
51422	ENSG00000106617	PRKAG2	protein kinase AMP-activated non-catalytic subunit gamma 2	-1.00388	4.56747	5.3001	0.029059	0.463296
26160	ENSG00000138002	IFT172	intraflagellar transport 172	-3.78809	1.17783	5.39777	0.0290767	0.463319
7589	ENSG00000166529	ZSCAN21	zinc finger and SCAN domain containing 21	1.80496	1.7753	5.29705	0.0291015	0.463453
78987	ENSG00000163703	CRELD1	cysteine rich with EGF like domains 1	-1.57072	2.71191	5.29439	0.0291385	0.463782
283575	ENSG00000246548	LINC02288	long intergenic non-protein coding RNA 2288	2.28513	1.06836	5.29065	0.0291908	0.464063
221935	ENSG00000146555	SDK1	sidekick cell adhesion molecule 1	-3.05326	0.948784	5.38587	0.0292377	0.464063
51123	ENSG00000120963	ZNF706	zinc finger protein 706	-0.889006	4.54347	5.28707	0.029241	0.464063
5196	ENSG00000163737	PF4	platelet factor 4	1.36814	3.4757	5.2866	0.0292476	0.464063
51582	ENSG00000155096	AZIN1	antizyme inhibitor 1	-0.784386	7.91388	5.28574	0.0292596	0.464063
9802	ENSG00000183283	DAZAP2	DAZ associated protein 2	-0.73818	5.80222	5.28404	0.0292835	0.464063
10975	ENSG00000127540	UQCR11	ubiquinol-cytochrome c reductase, complex III subunit XI	-1.08625	7.04525	5.28403	0.0292836	0.464063
10868	ENSG00000136878	USP20	ubiquitin specific peptidase 20	-1.34633	2.90395	5.28283	0.0293004	0.464063
124565	ENSG00000157637	SLC38A10	solute carrier family 38 member 10	-0.903054	4.03184	5.28204	0.0293116	0.464063
100302692	ENSG00000230590	FTX	FTX transcript, XIST regulator	1.6546	1.86734	5.28147	0.0293196	0.464063
7092	ENSG00000038295	TLL1	tolloid like 1	-1.56085	2.95563	5.27975	0.0293438	0.464079
23770	ENSG00000105701	FKBP8	FKBP prolyl isomerase 8	-1.78101	3.75107	5.27908	0.0293533	0.464079
79661	ENSG00000140398	NEIL1	nei like DNA glycosylase 1	-3.75319	1.17778	5.37509	0.0293843	0.464145
7326	ENSG00000132388	UBE2G1	ubiquitin conjugating enzyme E2 G1	-0.962187	3.78717	5.27646	0.0293901	0.464145
51371	ENSG00000132963	POMP	proteasome maturation protein	0.795932	10.1755	5.27206	0.0294522	0.464867
101929395	NA	LINC01752	long intergenic non-protein coding RNA 1752	2.39116	1.08558	5.2705	0.0294743	0.464956
23582	ENSG00000166946	CCNDBP1	cyclin D1 binding protein 1	-0.829416	6.74407	5.26618	0.0295355	0.465432
118738	ENSG00000265763	ZNF488	zinc finger protein 488	-3.35614	1.03659	5.36391	0.0295372	0.465432
2946	ENSG00000213366	GSTM2	glutathione S-transferase mu 2	1.49598	2.64249	5.26252	0.0295874	0.465832
10769	ENSG00000145632	PLK2	polo like kinase 2	-0.888112	4.14545	5.26066	0.0296138	0.465832
10549	ENSG00000123131	PRDX4	peroxiredoxin 4	-0.962678	6.38979	5.26061	0.0296146	0.465832
962	ENSG00000117091	CD48	CD48 molecule	2.0515	2.99282	5.25965	0.0296282	0.465832
4712	ENSG00000165264	NDUFB6	NADH:ubiquinone oxidoreductase subunit B6	0.707821	7.99093	5.25848	0.0296448	0.465835
3855	ENSG00000135480	KRT7	keratin 7	-0.988663	7.84171	5.25297	0.0297234	0.466445
92105	ENSG00000149262	INTS4	integrator complex subunit 4	-1.35363	3.48535	5.25178	0.0297404	0.466445
541468	ENSG00000171357	LURAP1	leucine rich adaptor protein 1	2.23917	1.05281	5.25151	0.0297443	0.466445
8613	ENSG00000162407	PLPP3	phospholipid phosphatase 3	-0.765368	7.97626	5.25115	0.0297493	0.466445
644186	ENSG00000217442	SYCE3	synaptonemal complex central element protein 3	-3.32233	1.02837	5.34616	0.0297818	0.466455
2629	ENSG00000177628	GBA1	glucosylceramidase beta 1	-0.797751	6.05111	5.2477	0.0297987	0.466455
84318	ENSG00000120647	CCDC77	coiled-coil domain containing 77	-1.83304	2.84538	5.24689	0.0298104	0.466455
969	ENSG00000110848	CD69	CD69 molecule	2.74063	1.54416	5.24549	0.0298304	0.466455
84984	ENSG00000174007	CEP19	centrosomal protein 19	-3.08164	0.955197	5.34254	0.0298321	0.466455
387066	ENSG00000203875	SNHG5	small nucleolar RNA host gene 5	-0.704968	6.47332	5.24351	0.0298589	0.466617
121512	ENSG00000139132	FGD4	FYVE, RhoGEF and PH domain containing 4	-0.785981	5.46573	5.2416	0.0298862	0.466787
339803	ENSG00000212978	C2orf74-DT	C2orf74 divergent transcript	1.09174	3.40249	5.23858	0.0299296	0.467208
8646	ENSG00000090539	CHRD	chordin	-3.39837	1.04716	5.33303	0.0299643	0.467493
7334	ENSG00000177889	UBE2N	ubiquitin conjugating enzyme E2 N	0.639492	5.83906	5.2294	0.030062	0.468229
4498	ENSG00000290662	MT1JP	metallothionein 1J, pseudogene	2.05696	1.67423	5.22934	0.0300629	0.468229
51218	ENSG00000182512	GLRX5	glutaredoxin 5	-0.699325	5.65486	5.22884	0.0300701	0.468229
219833	ENSG00000174370	KCNJ5-AS1	KCNJ5 antisense RNA 1	2.28578	0.811746	5.22833	0.0300775	0.468229
442245	NA	GSTM2P1	glutathione S-transferase mu 2 pseudogene 1	1.49368	2.37151	5.22269	0.0301591	0.469243
2215	ENSG00000162747	FCGR3B	Fc gamma receptor IIIb	1.01733	4.51031	5.22049	0.0301911	0.469483
23266	ENSG00000117114	ADGRL2	adhesion G protein-coupled receptor L2	-0.941364	4.18845	5.21759	0.0302332	0.469591
821	ENSG00000127022	CANX	calnexin	-0.757951	8.24551	5.21522	0.0302678	0.469591
100131205	ENSG00000220749	RPL21P28	ribosomal protein L21 pseudogene 28	0.770241	10.3892	5.21458	0.030277	0.469591
4360	ENSG00000260314	MRC1	mannose receptor C-type 1	0.834325	5.99881	5.21445	0.030279	0.469591
1937	ENSG00000254772	EEF1G	eukaryotic translation elongation factor 1 gamma	0.710346	9.04807	5.21433	0.0302807	0.469591
1983	ENSG00000100664	EIF5	eukaryotic translation initiation factor 5	-0.655729	6.30152	5.20846	0.0303664	0.470662
9241	ENSG00000183691	NOG	noggin	-2.60218	2.44244	5.20726	0.0303839	0.47067
152006	ENSG00000137075	RNF38	ring finger protein 38	-0.819094	4.49325	5.20616	0.0304001	0.47067
84660	ENSG00000130783	CCDC62	coiled-coil domain containing 62	2.31037	0.815476	5.2032	0.0304433	0.470827
137902	ENSG00000147485	PXDNL	peroxidasin like	2.31037	0.815476	5.2032	0.0304433	0.470827
29057	ENSG00000268350	FAM156A	family with sequence similarity 156 member A	-0.708448	6.19098	5.20101	0.0304755	0.471067
144817	ENSG00000235097	LINC00330	long intergenic non-protein coding RNA 330	-4.1179	1.30422	5.29138	0.0305513	0.471936
117177	ENSG00000127328	RAB3IP	RAB3A interacting protein	-1.43486	3.22639	5.19493	0.0305649	0.471936
63940	ENSG00000213654	GPSM3	G protein signaling modulator 3	1.55444	2.32655	5.19208	0.0306069	0.472188
727866	ENSG00000179304	FAM156B	family with sequence similarity 156 member B	-0.707458	6.21623	5.19156	0.0306145	0.472188
729830	ENSG00000164142	FHIP1A	FHF complex subunit HOOK interacting protein 1A	-2.64161	1.43982	5.18906	0.0306514	0.472501
54877	ENSG00000141664	ZCCHC2	zinc finger CCHC-type containing 2	-0.727648	5.89499	5.1869	0.0306834	0.472549
101409256	NA	LOC101409256	cell division cycle 42 pseudogene	2.37878	0.940156	5.18534	0.0307065	0.472549
2562	ENSG00000166206	GABRB3	gamma-aminobutyric acid type A receptor subunit beta3	-3.249	1.7338	5.18451	0.0307187	0.472549
23213	ENSG00000137573	SULF1	sulfatase 1	1.42347	2.83869	5.18421	0.0307231	0.472549
64855	ENSG00000136830	NIBAN2	niban apoptosis regulator 2	-0.807003	7.31749	5.18249	0.0307487	0.472549
26866	ENSG00000206588	RNU1-28P	RNA, U1 small nuclear 28, pseudogene	1.02081	3.59445	5.1819	0.0307574	0.472549
693155	ENSG00000207650	MIR570	microRNA 570	2.35719	0.986902	5.17951	0.0307928	0.472549
65008	ENSG00000169288	MRPL1	mitochondrial ribosomal protein L1	0.672656	6.68984	5.17925	0.0307966	0.472549
2590	ENSG00000143641	GALNT2	polypeptide N-acetylgalactosaminyltransferase 2	-1.06592	4.14107	5.17874	0.0308043	0.472549
7873	ENSG00000145050	MANF	mesencephalic astrocyte derived neurotrophic factor	-0.842009	5.13586	5.17389	0.0308764	0.473399
4312	ENSG00000196611	MMP1	matrix metallopeptidase 1	2.33788	1.45004	5.17257	0.030896	0.473444
8303	ENSG00000184602	SNN	stannin	2.01328	1.53939	5.1707	0.0309239	0.473567
2745	ENSG00000173221	GLRX	glutaredoxin	-0.911479	8.70404	5.1698	0.0309374	0.473567
8660	ENSG00000185950	IRS2	insulin receptor substrate 2	-0.800183	6.41527	5.16606	0.0309932	0.474052
23175	ENSG00000134324	LPIN1	lipin 1	1.01758	4.54446	5.16446	0.0310172	0.474052
6484	ENSG00000110080	ST3GAL4	ST3 beta-galactoside alpha-2,3-sialyltransferase 4	-0.925424	5.65307	5.16433	0.0310191	0.474052
100126800	NA	SNAR-A12	small NF90 (ILF3) associated RNA A12	1.24395	5.09657	5.15896	0.0310996	0.475025
100133319	ENSG00000278873	PRO1804	uncharacterized LOC100133319	2.34608	0.936964	5.15652	0.0311361	0.475118
25891	ENSG00000149090	PAMR1	peptidase domain containing associated with muscle regeneration 1	1.19032	3.12737	5.15633	0.0311391	0.475118
240	ENSG00000012779	ALOX5	arachidonate 5-lipoxygenase	-1.56796	2.79045	5.15499	0.0311593	0.475171
4100	ENSG00000198681	MAGEA1	MAGE family member A1	2.31083	0.83756	5.15379	0.0311773	0.47518
699	ENSG00000169679	BUB1	BUB1 mitotic checkpoint serine/threonine kinase	1.1665	3.51627	5.15272	0.0311934	0.47518
9689	ENSG00000082153	BZW1	basic leucine zipper and W2 domains 1	-0.667923	6.31695	5.15024	0.0312307	0.475315
54952	ENSG00000180098	TRNAU1AP	tRNA selenocysteine 1 associated protein 1	0.795012	5.12825	5.14991	0.0312357	0.475315
3163	ENSG00000103415	HMOX2	heme oxygenase 2	0.789917	4.93202	5.14577	0.0312982	0.476011
55064	ENSG00000106686	SPATA6L	spermatogenesis associated 6 like	1.86965	1.93907	5.14071	0.0313748	0.476921
9770	ENSG00000101265	RASSF2	Ras association domain family member 2	1.35908	2.59451	5.13805	0.0314152	0.477279
51109	ENSG00000072042	RDH11	retinol dehydrogenase 11	-0.833703	4.85046	5.13617	0.0314437	0.477457
390561	NA	HERC2P10	HERC2 pseudogene 10	2.37139	0.975683	5.13187	0.0315091	0.478041
55334	ENSG00000029364	SLC39A9	solute carrier family 39 member 9	-0.821531	4.60962	5.13134	0.0315172	0.478041
401115	ENSG00000243449	NICOL1	NELL2 interacting cell ontogeny regulator 1	-3.08279	0.955552	5.22369	0.0315327	0.478041
3606	ENSG00000150782	IL18	interleukin 18	1.25149	3.92358	5.12914	0.0315507	0.478059
79180	ENSG00000142634	EFHD2	EF-hand domain family member D2	-1.11098	3.946	5.11954	0.0316975	0.480027
2625	ENSG00000107485	GATA3	GATA binding protein 3	-0.697321	7.41295	5.1178	0.0317242	0.480175
6085	ENSG00000202354	RNY3	RNA, Ro60-associated Y3	0.831354	4.50244	5.11339	0.0317919	0.480709
254268	ENSG00000162641	AKNAD1	AKNA domain containing 1	1.53119	2.09417	5.11328	0.0317936	0.480709
7112	ENSG00000120802	TMPO	thymopoietin	0.832577	5.3814	5.11219	0.0318103	0.480709
56164	ENSG00000196335	STK31	serine/threonine kinase 31	1.90626	1.71782	5.10966	0.0318493	0.481014
55239	ENSG00000087263	OGFOD1	2-oxoglutarate and iron dependent oxygenase domain containing 1	0.754002	6.13883	5.10869	0.0318643	0.481014
4298	ENSG00000130382	MLLT1	MLLT1 super elongation complex subunit	-0.682614	6.68957	5.10438	0.0319307	0.481426
128977	ENSG00000242259	C22orf39	chromosome 22 open reading frame 39	-1.06091	3.48755	5.10373	0.0319408	0.481426
27292	ENSG00000086189	DIMT1	DIM1 rRNA methyltransferase and ribosome maturation factor	-0.953219	4.22188	5.10362	0.0319425	0.481426
343172	ENSG00000177462	OR2T8	olfactory receptor family 2 subfamily T member 8	-3.28173	1.01827	5.19394	0.0319752	0.481664
2326	ENSG00000010932	FMO1	flavin containing dimethylaniline monoxygenase 1	-4.27985	1.37701	5.1902	0.0320313	0.482253
8550	ENSG00000089022	MAPKAPK5	MAPK activated protein kinase 5	0.88149	3.6963	5.09021	0.0321505	0.48323
27075	ENSG00000106537	TSPAN13	tetraspanin 13	-0.991553	4.13057	5.08916	0.0321669	0.48323
100128927	ENSG00000179627	ZBTB42	zinc finger and BTB domain containing 42	-3.1483	0.978136	5.18077	0.0321733	0.48323
28962	ENSG00000081087	OSTM1	osteoclastogenesis associated transmembrane protein 1	-0.756357	5.74694	5.08866	0.0321747	0.48323
50861	ENSG00000197457	STMN3	stathmin 3	-0.914205	4.78581	5.08794	0.0321859	0.48323
89780	ENSG00000154342	WNT3A	Wnt family member 3A	-3.8871	1.23344	5.17911	0.0321983	0.48323
10483	ENSG00000101310	SEC23B	SEC23 homolog B, COPII coat complex component	-1.21839	5.23964	5.08128	0.0322899	0.484209
1038	NA	CDR1	cerebellar degeneration related 1	2.67832	1.04468	5.08078	0.0322977	0.484209
100129827	ENSG00000177112	IRAG1-AS1	IRAG1 antisense RNA 1	2.38987	1.05584	5.07329	0.0324152	0.485029
10558	ENSG00000090054	SPTLC1	serine palmitoyltransferase long chain base subunit 1	-0.823031	5.61183	5.07039	0.0324608	0.485029
25898	ENSG00000163743	RCHY1	ring finger and CHY zinc finger domain containing 1	-0.881715	4.22738	5.06947	0.0324752	0.485029
27020	ENSG00000156642	NPTN	neuroplastin	-0.767706	4.95606	5.06932	0.0324776	0.485029
100131320	ENSG00000290615	RAB6C-AS1	RAB6C antisense RNA 1	-2.63912	1.43107	5.06897	0.0324831	0.485029
55829	ENSG00000131871	SELENOS	selenoprotein S	-0.828284	6.06994	5.06843	0.0324916	0.485029
1846	ENSG00000120875	DUSP4	dual specificity phosphatase 4	-0.907769	5.76972	5.06829	0.0324938	0.485029
23184	ENSG00000117899	MESD	mesoderm development LRP chaperone	-0.863709	6.6802	5.06758	0.0325051	0.485029
200558	ENSG00000169621	APLF	aprataxin and PNKP like factor	-2.49607	1.95962	5.06644	0.032523	0.485029
23443	ENSG00000117620	SLC35A3	solute carrier family 35 member A3	-0.897583	3.8963	5.06643	0.0325232	0.485029
85403	ENSG00000144597	EAF1	ELL associated factor 1	-1.00423	3.64483	5.06285	0.0325797	0.485375
4860	ENSG00000198805	PNP	purine nucleoside phosphorylase	0.76844	8.12929	5.06279	0.0325806	0.485375
11188	ENSG00000010322	NISCH	nischarin	0.767663	5.83358	5.06069	0.0326139	0.485617
23294	ENSG00000064999	ANKS1A	ankyrin repeat and sterile alpha motif domain containing 1A	-0.734084	4.99803	5.05875	0.0326445	0.485714
4564	NA	TRNH	tRNA-His	-1.17053	4.39931	5.05811	0.0326547	0.485714
5801	ENSG00000153233	PTPRR	protein tyrosine phosphatase receptor type R	-3.81193	1.21097	5.14543	0.0327117	0.486308
202020	ENSG00000263327	TAPT1-AS1	TAPT1 antisense RNA 1 (head to head)	0.767751	9.45072	5.05256	0.0327427	0.486514
84661	ENSG00000162961	DPY30	dpy-30 histone methyltransferase complex regulatory subunit	0.657679	7.16267	5.05135	0.0327619	0.486546
27098	ENSG00000079101	CLUL1	clusterin like 1	2.34993	1.33403	5.04996	0.0327841	0.48662
6237	ENSG00000126458	RRAS	RAS related	-1.12651	3.69677	5.04741	0.0328246	0.486967
23366	ENSG00000164542	MATCAP2	microtubule associated tyrosine carboxypeptidase 2	-3.17897	0.985135	5.13669	0.0328463	0.487035
4700	ENSG00000184983	NDUFA6	NADH:ubiquinone oxidoreductase subunit A6	0.703221	8.77345	5.04468	0.0328682	0.487038
5702	ENSG00000165916	PSMC3	proteasome 26S subunit, ATPase 3	0.624442	6.70655	5.04389	0.0328808	0.487038
200845	ENSG00000168301	KCTD6	potassium channel tetramerization domain containing 6	-2.13898	1.53731	5.04249	0.0329031	0.487114
114904	ENSG00000133466	C1QTNF6	C1q and TNF related 6	-1.14254	4.23865	5.0316	0.0330775	0.489441
595101	ENSG00000291266	SMG1P5	SMG1 pseudogene 5	0.728452	5.01807	5.02889	0.0331212	0.489763
92912	ENSG00000140367	UBE2Q2	ubiquitin conjugating enzyme E2 Q2	-0.690115	5.28675	5.0281	0.0331338	0.489763
93979	ENSG00000158525	CPA5	carboxypeptidase A5	-3.2341	0.999042	5.11454	0.0331904	0.490261
8886	ENSG00000088205	DDX18	DEAD-box helicase 18	0.603751	6.59345	5.02359	0.0332067	0.490261
10267	ENSG00000132329	RAMP1	receptor activity modifying protein 1	-3.51723	1.08669	5.11256	0.0332214	0.490261
100507477	ENSG00000236013	LINC02941	long intergenic non-protein coding RNA 2941	-3.22107	0.995525	5.11159	0.0332366	0.490261
713	ENSG00000173369	C1QB	complement C1q B chain	0.867971	6.29971	5.01845	0.0332897	0.49079
83982	ENSG00000119632	IFI27L2	interferon alpha inducible protein 27 like 2	1.32969	3.253	5.01632	0.0333242	0.490884
5738	ENSG00000134247	PTGFRN	prostaglandin F2 receptor inhibitor	-0.974403	4.66242	5.01591	0.0333307	0.490884
8301	ENSG00000073921	PICALM	phosphatidylinositol binding clathrin assembly protein	-0.68102	6.69357	5.0147	0.0333505	0.490921
339201	ENSG00000267080	ASB16-AS1	ASB16 antisense RNA 1	-1.55728	2.4105	5.01353	0.0333693	0.490944
94103	ENSG00000172057	ORMDL3	ORMDL sphingolipid biosynthesis regulator 3	-0.730606	5.23473	5.00581	0.0334948	0.492482
1856	ENSG00000004975	DVL2	dishevelled segment polarity protein 2	-0.911226	4.17416	5.00497	0.0335085	0.492482
9156	ENSG00000174371	EXO1	exonuclease 1	-2.39147	2.5818	4.99991	0.0335912	0.493441
134492	ENSG00000170584	NUDCD2	NudC domain containing 2	-1.0305	3.81825	4.99541	0.0336647	0.49422
100873740	ENSG00000207116	RNU6-31P	RNA, U6 small nuclear 31, pseudogene	2.17566	1.17486	4.99352	0.0336957	0.49422
79598	ENSG00000182504	CEP97	centrosomal protein 97	1.20151	2.78737	4.99348	0.0336964	0.49422
402176	NA	RPL21P44	ribosomal protein L21 pseudogene 44	2.25129	0.816467	4.98897	0.0337705	0.495051
64129	ENSG00000142910	TINAGL1	tubulointerstitial nephritis antigen like 1	-0.640739	7.31946	4.98612	0.0338174	0.495482
54626	ENSG00000069812	HES2	hes family bHLH transcription factor 2	-0.768497	5.98235	4.98363	0.0338584	0.495658
6614	ENSG00000088827	SIGLEC1	sialic acid binding Ig like lectin 1	0.830458	4.78178	4.98327	0.0338643	0.495658
4500	ENSG00000291105	MT1L	metallothionein 1L (pseudogene)	1.55853	2.7328	4.98154	0.0338928	0.49582
6201	ENSG00000171863	RPS7	ribosomal protein S7	-0.757832	6.28823	4.97853	0.0339426	0.496293
6192	ENSG00000129824	RPS4Y1	ribosomal protein S4 Y-linked 1	1.94865	6.80913	4.97636	0.0339786	0.496563
221960	ENSG00000146574	CCZ1B	CCZ1 homolog B, vacuolar protein trafficking and biogenesis associated	-0.82168	4.57534	4.97294	0.0340351	0.497133
4109	ENSG00000124260	MAGEA10	MAGE family member A10	-0.770014	6.09075	4.96725	0.0341297	0.498259
10902	ENSG00000112983	BRD8	bromodomain containing 8	0.645219	5.85739	4.96551	0.0341586	0.498425
6442	ENSG00000108823	SGCA	sarcoglycan alpha	-3.51557	1.09492	5.05045	0.0342091	0.498905
51594	ENSG00000151779	NBAS	NBAS subunit of NRZ tethering complex	0.854958	4.84029	4.96014	0.0342482	0.498991
101929989	ENSG00000283516	LITAFD	LITAF domain containing	2.49589	1.09302	4.95972	0.0342552	0.498991
2022	ENSG00000106991	ENG	endoglin	-1.12688	6.80978	4.95864	0.0342732	0.498991
5611	ENSG00000102580	DNAJC3	DnaJ heat shock protein family (Hsp40) member C3	-0.716232	7.20836	4.95792	0.0342853	0.498991
64761	ENSG00000059378	PARP12	poly(ADP-ribose) polymerase family member 12	-2.45899	1.71276	4.95391	0.0343523	0.499395
338328	ENSG00000277494	GPIHBP1	glycosylphosphatidylinositol anchored high density lipoprotein binding protein 1	-3.18191	0.986168	5.03999	0.0343786	0.499395
121441	ENSG00000139350	NEDD1	NEDD1 gamma-tubulin ring complex targeting factor	-2.08185	2.19054	4.95213	0.0343821	0.499395
131965	ENSG00000206562	METTL6	methyltransferase 6, tRNA N3-cytidine	0.847	4.76373	4.95206	0.0343834	0.499395
137872	ENSG00000147576	ADHFE1	alcohol dehydrogenase iron containing 1	-1.04825	7.33876	4.94924	0.0344307	0.499695
51646	ENSG00000119801	YPEL5	yippee like 5	-0.640822	7.43352	4.94851	0.034443	0.499695
1501	ENSG00000169862	CTNND2	catenin delta 2	-3.51439	1.09377	5.03518	0.0344569	0.499695
54733	ENSG00000110660	SLC35F2	solute carrier family 35 member F2	-1.26285	3.72949	4.94504	0.0345013	0.499944
100873940	ENSG00000250174	MYLK-AS2	MYLK antisense RNA 2	2.30611	0.823935	4.94457	0.0345093	0.499944
100190986	NA	LOC100190986	uncharacterized LOC100190986	0.999779	4.87655	4.94118	0.0345664	0.49999
64321	ENSG00000164736	SOX17	SRY-box transcription factor 17	-2.19803	1.83136	4.94117	0.0345666	0.49999
151254	ENSG00000155754	C2CD6	C2 calcium dependent domain containing 6	-4.15135	1.31351	5.02775	0.0345782	0.49999
6499	ENSG00000204351	SKIC2	SKI2 subunit of superkiller complex	-1.54408	3.14776	4.93923	0.0345994	0.49999
221806	ENSG00000146530	VWDE	von Willebrand factor D and EGF domains	-4.25842	1.34862	5.02639	0.0346005	0.49999
4277	ENSG00000204516	MICB	MHC class I polypeptide-related sequence B	2.23327	1.16684	4.9265	0.034815	0.502651
5685	ENSG00000041357	PSMA4	proteasome 20S subunit alpha 4	0.698221	9.23521	4.92621	0.03482	0.502651
2944	ENSG00000134184	GSTM1	glutathione S-transferase mu 1	1.46989	2.69196	4.9244	0.0348508	0.502701
9308	ENSG00000112149	CD83	CD83 molecule	1.90864	2.02094	4.92392	0.0348589	0.502701
1264	ENSG00000130176	CNN1	calponin 1	-1.88924	2.39387	4.91864	0.0349491	0.503656
8543	ENSG00000143013	LMO4	LIM domain only 4	-0.658593	6.04409	4.91796	0.0349606	0.503656
112479	ENSG00000196678	ERI2	ERI1 exoribonuclease family member 2	-3.36536	1.04639	5.00095	0.0350198	0.504252
148581	ENSG00000177414	UBE2U	ubiquitin conjugating enzyme E2 U	-3.24689	1.00874	4.99664	0.0350914	0.504809
6338	ENSG00000168447	SCNN1B	sodium channel epithelial 1 subunit beta	-1.22887	3.81819	4.91017	0.0350939	0.504809
23071	ENSG00000023318	ERP44	endoplasmic reticulum protein 44	-0.93443	7.21238	4.90879	0.0351176	0.504894
5156	ENSG00000134853	PDGFRA	platelet derived growth factor receptor alpha	1.12057	5.81824	4.90381	0.0352032	0.505868
51247	ENSG00000120727	PAIP2	poly(A) binding protein interacting protein 2	-0.739606	6.18095	4.90256	0.0352249	0.505923
100873746	ENSG00000207360	RNU6-14P	RNA, U6 small nuclear 14, pseudogene	0.980251	4.96546	4.89712	0.0353187	0.507014
27332	ENSG00000075292	ZNF638	zinc finger protein 638	0.681333	6.01835	4.8939	0.0353743	0.507556
151648	ENSG00000129810	SGO1	shugoshin 1	1.76194	1.91496	4.88847	0.0354685	0.508347
101928565	ENSG00000228697	LOC101928565	uncharacterized LOC101928565	2.33547	1.00134	4.88688	0.0354961	0.508347
9646	ENSG00000198730	CTR9	CTR9 homolog, Paf1/RNA polymerase II complex component	-0.783192	5.39227	4.88668	0.0354995	0.508347
164395	ENSG00000131044	TTLL9	tubulin tyrosine ligase like 9	2.25958	1.00127	4.88659	0.035501	0.508347
112950	ENSG00000159479	MED8	mediator complex subunit 8	0.698183	4.86536	4.88145	0.0355905	0.509197
100996792	ENSG00000283566	LOC100996792	dual specificity mitogen-activated protein kinase kinase 3 pseudogene	-2.02538	1.86529	4.88088	0.0356005	0.509197
29124	ENSG00000105198	LGALS13	galectin 13	-0.970153	7.00131	4.87935	0.0356271	0.509197
29995	ENSG00000071282	LMCD1	LIM and cysteine rich domains 1	-1.00723	5.78914	4.87825	0.0356464	0.509197
7139	ENSG00000118194	TNNT2	troponin T2, cardiac type	1.42262	3.08502	4.87804	0.03565	0.509197
646603	ENSG00000237136	C4orf51	chromosome 4 open reading frame 51	2.29927	1.25305	4.87095	0.0357741	0.510562
8019	ENSG00000169925	BRD3	bromodomain containing 3	-0.772099	5.17429	4.86978	0.0357945	0.510562
101929692	NA	LOC101929692	uncharacterized LOC101929692	-3.57089	1.10109	4.95453	0.0357996	0.510562
353514	ENSG00000187116	LILRA5	leukocyte immunoglobulin like receptor A5	2.39602	1.18722	4.86643	0.0358534	0.511073
55744	ENSG00000106603	COA1	cytochrome c oxidase assembly factor 1	0.765418	5.12437	4.86217	0.0359283	0.511883
5226	ENSG00000142657	PGD	phosphogluconate dehydrogenase	0.935348	4.13414	4.8576	0.0360088	0.512258
388325	ENSG00000161929	SCIMP	SLP adaptor and CSK interacting membrane protein	2.40723	1.4047	4.85541	0.0360475	0.512258
34	ENSG00000117054	ACADM	acyl-CoA dehydrogenase medium chain	0.7247	5.42507	4.85514	0.0360522	0.512258
1159	ENSG00000237289	CKMT1B	creatine kinase, mitochondrial 1B	0.859732	4.11844	4.85498	0.036055	0.512258
23550	ENSG00000125637	PSD4	pleckstrin and Sec7 domain containing 4	-1.16659	3.60162	4.85456	0.0360626	0.512258
[truncated: 26,397 more rows]

## Sheet: Table S3
edgeR DE analysis: Term-warm vs. Term-cold
ENTREZID	ENSEMBL	SYMBOL	GENENAME	logFC	logCPM	F	PValue	FDR
85301	ENSG00000196739	COL27A1	collagen type XXVII alpha 1 chain	3.0385	2.82646	23.611	4.06173e-05	0.72912
1543	ENSG00000140465	CYP1A1	cytochrome P450 family 1 subfamily A member 1	5.79721	2.40304	22.785	5.13555e-05	0.72912
100505851	ENSG00000269289	LOC100505851	uncharacterized LOC100505851	5.18204	1.27418	21.6717	0.000135119	0.93505
23284	ENSG00000150471	ADGRL3	adhesion G protein-coupled receptor L3	-2.11915	4.05551	19.427	0.000139314	0.93505
286499	ENSG00000179083	FAM133A	family with sequence similarity 133 member A	5.69145	1.60495	20.344	0.00019093	0.93505
100049587	ENSG00000254415	SIGLEC14	sialic acid binding Ig like lectin 14	3.9329	1.57721	18.3092	0.000197581	0.93505
100996761	NA	NA	NA	1.33579	3.81705	16.8933	0.000311809	1
55094	ENSG00000076650	GPATCH1	G-patch domain containing 1	1.56114	4.5568	16.5116	0.000353583	1
84698	ENSG00000180881	CAPS2	calcyphosine 2	3.97605	1.43241	15.6604	0.000470109	1
8623	ENSG00000169093	ASMTL	acetylserotonin O-methyltransferase like	-2.38958	3.53184	15.6334	0.000474414	1
2326	ENSG00000010932	FMO1	flavin containing dimethylaniline monoxygenase 1	4.0928	1.18809	15.4413	0.000506387	1
150372	ENSG00000235568	NFAM1	NFAT activating protein with ITAM motif 1	4.29626	0.946491	16.4521	0.000566224	1
8569	ENSG00000079277	MKNK1	MAPK interacting serine/threonine kinase 1	1.44476	3.5386	14.6541	0.000663742	1
339896	ENSG00000144644	GADL1	glutamate decarboxylase like 1	4.14737	1.20848	14.6231	0.000670928	1
28998	ENSG00000172172	MRPL13	mitochondrial ribosomal protein L13	1.03483	6.76664	14.5338	0.000692132	1
692084	ENSG00000239039	SNORD13	small nucleolar RNA, C/D box 13	1.561	5.63371	14.3897	0.000727827	1
83874	ENSG00000099992	TBC1D10A	TBC1 domain family member 10A	-1.21117	5.32954	14.3255	0.000744398	1
10578	ENSG00000115523	GNLY	granulysin	2.95066	2.56767	13.7134	0.000924183	1
833	ENSG00000110619	CARS1	cysteinyl-tRNA synthetase 1	1.21642	4.76181	13.5652	0.000974399	1
79925	ENSG00000152582	SPEF2	sperm flagellar 2	-2.08077	3.06809	13.4486	0.001016	1
2974	ENSG00000123201	GUCY1B2	guanylate cyclase 1 soluble subunit beta 2 (pseudogene)	3.93152	1.12469	13.3901	0.00103759	1
79818	ENSG00000178935	ZNF552	zinc finger protein 552	1.31433	3.51727	13.0866	0.00115779	1
5130	ENSG00000161217	PCYT1A	phosphate cytidylyltransferase 1A, choline	2.11551	2.55378	13.0242	0.00118435	1
164781	ENSG00000123977	DAW1	dynein assembly factor with WD repeats 1	4.12272	1.18209	12.9801	0.00120346	1
643847	ENSG00000229183	PGA4	pepsinogen A4	3.23978	1.61081	12.893	0.00124229	1
471	ENSG00000138363	ATIC	5-aminoimidazole-4-carboxamide ribonucleotide formyltransferase/IMP cyclohydrolase	-1.39469	5.17798	12.7605	0.0013039	1
347730	ENSG00000162951	LRRTM1	leucine rich repeat transmembrane neuronal 1	4.03128	0.907636	13.5785	0.00137293	1
148741	ENSG00000198483	ANKRD35	ankyrin repeat domain 35	4.04958	0.888723	13.5387	0.00139066	1
151306	ENSG00000179921	GPBAR1	G protein-coupled bile acid receptor 1	4.07988	0.913523	13.4713	0.00142131	1
325	ENSG00000132703	APCS	amyloid P component, serum	3.44089	1.0014	12.4943	0.00143798	1
6713	ENSG00000104549	SQLE	squalene epoxidase	-1.13489	5.56955	12.4413	0.00146637	1
7818	ENSG00000132676	DAP3	death associated protein 3	0.947569	5.37757	12.4293	0.00147291	1
11164	ENSG00000165609	NUDT5	nudix hydrolase 5	1.25927	4.03038	12.2171	0.00159354	1
284344	ENSG00000241104	LOC284344	uncharacterized LOC284344	-1.56593	10.9043	12.1615	0.00162687	1
643834	ENSG00000229859	PGA3	pepsinogen A3	3.13844	1.68518	12.1114	0.0016575	1
23301	ENSG00000115504	EHBP1	EH domain binding protein 1	-3.11958	2.13246	11.9457	0.00176354	1
4577	NA	TRNV	tRNA-Val	-1.35367	9.4122	11.903	0.00179201	1
57717	ENSG00000272674	PCDHB16	protocadherin beta 16	3.35111	0.957751	11.762	0.00188965	1
100170220	NA	SNAR-E	small NF90 (ILF3) associated RNA E	1.24593	7.31529	11.7536	0.00189568	1
373856	ENSG00000161133	USP41P	ubiquitin specific peptidase 41, pseudogene	3.76178	0.828592	12.574	0.00190843	1
6288	ENSG00000173432	SAA1	serum amyloid A1	2.0158	4.36827	11.7311	0.00191184	1
7222	ENSG00000138741	TRPC3	transient receptor potential cation channel subfamily C member 3	4.13782	0.944096	12.5146	0.00194664	1
441027	ENSG00000249242	TMEM150C	transmembrane protein 150C	-4.82717	1.64214	11.8818	0.0020962	1
7762	ENSG00000149054	ZNF215	zinc finger protein 215	3.42438	1.19983	11.3653	0.00219665	1
6340	ENSG00000166828	SCNN1G	sodium channel epithelial 1 subunit gamma	4.29611	0.948804	12.0967	0.00224057	1
389336	ENSG00000178776	C5orf46	chromosome 5 open reading frame 46	2.59386	1.70582	11.3049	0.00224795	1
11041	ENSG00000174684	B4GAT1	beta-1,4-glucuronyltransferase 1	-1.22541	5.59655	11.2929	0.0022583	1
6383	ENSG00000169439	SDC2	syndecan 2	-1.27313	4.38371	11.2695	0.00227856	1
5695	ENSG00000136930	PSMB7	proteasome 20S subunit beta 7	1.02944	7.57507	11.2172	0.00232469	1
874	ENSG00000159231	CBR3	carbonyl reductase 3	1.98956	2.0067	11.1984	0.00234154	1
3681	ENSG00000156886	ITGAD	integrin subunit alpha D	3.73312	1.07832	11.161	0.00237541	1
51181	ENSG00000169738	DCXR	dicarbonyl and L-xylulose reductase	-1.32059	4.0158	11.1235	0.00240984	1
51761	ENSG00000132932	ATP8A2	ATPase phospholipid transporting 8A2	3.07421	1.21342	11.1065	0.00242572	1
120071	ENSG00000165905	LARGE2	LARGE xylosyl- and glucuronyltransferase 2	-1.18741	5.28483	10.8966	0.00263044	1
1837	ENSG00000134769	DTNA	dystrobrevin alpha	2.67025	1.45815	10.8173	0.00271259	1
158158	ENSG00000165105	RASEF	RAS and EF-hand domain containing	-1.88831	2.96258	10.8098	0.00272046	1
92979	ENSG00000139266	MARCHF9	membrane associated ring-CH-type finger 9	-4.11891	1.28469	11.154	0.00272843	1
10907	ENSG00000141759	TXNL4A	thioredoxin like 4A	-0.860257	6.19324	10.6694	0.00287333	1
80349	ENSG00000140395	SKIC8	SKI8 subunit of superkiller complex	0.824936	6.76246	10.5993	0.00295302	1
140701	ENSG00000183260	ABHD16B	abhydrolase domain containing 16B	-4.18231	1.29525	10.9209	0.00297292	1
10668	ENSG00000100532	CGRRF1	cell growth regulator with ring finger domain 1	1.4569	3.46678	10.5727	0.00298393	1
146556	ENSG00000153446	C16orf89	chromosome 16 open reading frame 89	3.48799	0.774561	11.23	0.00301941	1
6005	ENSG00000112077	RHAG	Rh associated glycoprotein	3.74917	1.02082	10.4544	0.00312564	1
55971	ENSG00000006453	BAIAP2L1	BAR/IMD domain containing adaptor protein 2 like 1	-1.30012	4.03656	10.433	0.00315201	1
441194	ENSG00000187953	PMS2CL	PMS2 C-terminal like (pseudogene)	1.18406	3.73181	10.4285	0.0031576	1
121355	ENSG00000170627	GTSF1	gametocyte specific factor 1	1.51371	5.91926	10.3751	0.00322462	1
8803	ENSG00000136143	SUCLA2	succinate-CoA ligase ADP-forming subunit beta	-1.24705	3.65976	10.3375	0.00327275	1
129531	ENSG00000158411	MITD1	microtubule interacting and trafficking domain containing 1	0.900175	4.91702	10.3304	0.00328194	1
7127	ENSG00000185215	TNFAIP2	TNF alpha induced protein 2	1.31402	4.4633	10.2684	0.00336325	1
219844	ENSG00000198331	HYLS1	HYLS1 centriolar and ciliogenesis associated	1.93584	2.30979	10.2212	0.00342667	1
1889	ENSG00000117298	ECE1	endothelin converting enzyme 1	-1.3915	5.18914	10.1889	0.00347072	1
5222	ENSG00000256713	PGA5	pepsinogen A5	2.90495	1.57277	10.1167	0.00357166	1
338323	ENSG00000158077	NLRP14	NLR family pyrin domain containing 14	3.91165	0.849083	10.7469	0.00358047	1
84503	ENSG00000189164	ZNF527	zinc finger protein 527	-4.28402	1.36163	10.3529	0.0036749	1
10189	ENSG00000183684	ALYREF	Aly/REF export factor	-1.12646	4.03562	10.0344	0.00369038	1
6041	ENSG00000135828	RNASEL	ribonuclease L	1.35716	2.97508	10.0322	0.00369362	1
29074	ENSG00000112110	MRPL18	mitochondrial ribosomal protein L18	0.889632	5.54973	10.0106	0.00372561	1
26519	ENSG00000134809	TIMM10	translocase of inner mitochondrial membrane 10	1.08833	5.1763	9.97561	0.00377793	1
9310	ENSG00000159917	ZNF235	zinc finger protein 235	2.45377	1.72078	9.94529	0.00382394	1
11224	ENSG00000136942	RPL35	ribosomal protein L35	1.35392	4.98509	9.93111	0.00384567	1
33	ENSG00000115361	ACADL	acyl-CoA dehydrogenase long chain	-3.67976	2.03112	9.90285	0.00388937	1
101928419	NA	LOC101928419	uncharacterized LOC101928419	3.21162	0.959736	9.87237	0.00393709	1
55843	ENSG00000075884	ARHGAP15	Rho GTPase activating protein 15	-3.5233	1.92067	9.86059	0.00395571	1
643707	ENSG00000184206	GOLGA6L4	golgin A6 family like 4	1.98475	2.1196	9.80763	0.0040406	1
10855	ENSG00000173083	HPSE	heparanase	-1.59807	5.22305	9.80682	0.00404191	1
9056	ENSG00000155465	SLC7A7	solute carrier family 7 member 7	-4.34092	1.38912	10.0857	0.00406629	1
4103	ENSG00000147381	MAGEA4	MAGE family member A4	2.06802	4.06006	9.77397	0.00409556	1
128102	NA	HSD3BP4	hydroxy-delta-5-steroid dehydrogenase, 3 beta, pseudogene 4	1.68231	4.69268	9.71682	0.00419077	1
11122	ENSG00000196090	PTPRT	protein tyrosine phosphatase receptor type T	-4.04976	1.25723	9.9687	0.00425189	1
101927973	ENSG00000236532	LINC01695	long intergenic non-protein coding RNA 1695	3.01669	0.8852	9.63847	0.00432519	1
644	ENSG00000106605	BLVRA	biliverdin reductase A	1.20784	5.41041	9.63747	0.00432694	1
8573	ENSG00000147044	CASK	calcium/calmodulin dependent serine protein kinase	-2.10376	2.74007	9.63252	0.00433559	1
677800	ENSG00000212464	SNORA12	small nucleolar RNA, H/ACA box 12	1.48494	3.97358	9.59816	0.00439617	1
118924	ENSG00000148690	FRA10AC1	FRA10A associated CGG repeat 1	-1.30414	4.28537	9.59289	0.00440555	1
102157401	ENSG00000282977	PCBP2-OT1	PCBP2 overlapping transcript 1	-3.12783	1.65818	9.57679	0.00443431	1
80740	ENSG00000204421	LY6G6C	lymphocyte antigen 6 family member G6C	1.26999	4.28054	9.54969	0.00448319	1
285596	ENSG00000170074	FAM153A	family with sequence similarity 153 member A	3.36928	0.740566	10.1102	0.00450337	1
644962	NA	TNRC18P1	trinucleotide repeat containing 18 pseudogene 1	2.84791	0.839181	9.53061	0.00451795	1
10046	ENSG00000013619	MAMLD1	mastermind like domain containing 1	3.2307	0.726665	10.0751	0.00456142	1
440915	NA	POTEKP	POTE ankyrin domain family member K, pseudogene	3.51705	0.756295	10.0727	0.00456551	1
5395	ENSG00000122512	PMS2	PMS1 homolog 2, mismatch repair system component	0.969648	4.69457	9.49452	0.00458453	1
5836	ENSG00000100504	PYGL	glycogen phosphorylase L	-1.19521	4.3651	9.48865	0.00459545	1
387103	ENSG00000203760	CENPW	centromere protein W	0.968673	4.62922	9.46137	0.00464661	1
9783	ENSG00000117016	RIMS3	regulating synaptic membrane exocytosis 3	-3.015	1.57501	9.39948	0.00476495	1
65062	ENSG00000155755	TMEM237	transmembrane protein 237	-1.91964	2.60146	9.36704	0.00482828	1
3127	ENSG00000198502	HLA-DRB5	major histocompatibility complex, class II, DR beta 5	2.04678	2.61267	9.33099	0.00489975	1
257044	ENSG00000179397	CATSPERE	catsper channel auxiliary subunit epsilon	3.7504	0.805669	9.87117	0.00491546	1
387640	ENSG00000180592	SKIDA1	SKI/DACH domain containing 1	-4.0341	1.23173	9.57647	0.00494481	1
8876	ENSG00000112299	VNN1	vanin 1	2.87715	1.32908	9.30076	0.00496054	1
57002	ENSG00000241127	YAE1	YAE1 maturation factor of ABCE1	1.22745	4.07658	9.29716	0.00496785	1
100170224	NA	SNAR-B1	small NF90 (ILF3) associated RNA B1	1.11449	8.31277	9.27573	0.00501152	1
9447	ENSG00000163568	AIM2	absent in melanoma 2	3.90149	0.821044	9.81618	0.00501606	1
100170217	NA	SNAR-B2	small NF90 (ILF3) associated RNA B2	1.10224	8.29631	9.27257	0.00501799	1
3563	ENSG00000185291	IL3RA	interleukin 3 receptor subunit alpha	-2.32982	4.26776	9.2538	0.00505663	1
6231	ENSG00000197728	RPS26	ribosomal protein S26	-1.4115	4.71764	9.23819	0.00508902	1
2184	ENSG00000103876	FAH	fumarylacetoacetate hydrolase	1.68327	3.48803	9.20779	0.00515272	1
155038	ENSG00000171115	GIMAP8	GTPase, IMAP family member 8	-1.37874	3.74572	9.19225	0.00518563	1
51244	ENSG00000154781	CCDC174	coiled-coil domain containing 174	0.754651	6.11098	9.19082	0.00518867	1
11278	ENSG00000118922	KLF12	KLF transcription factor 12	3.04782	0.880449	9.19063	0.00518908	1
10409	ENSG00000176788	BASP1	brain abundant membrane attached signal protein 1	-0.87429	6.87376	9.18884	0.00519289	1
29097	ENSG00000143771	CNIH4	cornichon family AMPA receptor auxiliary protein 4	0.818725	6.35891	9.18669	0.00519747	1
10240	ENSG00000102738	MRPS31	mitochondrial ribosomal protein S31	0.804433	5.57178	9.15586	0.00526359	1
6035	ENSG00000129538	RNASE1	ribonuclease A family member 1, pancreatic	0.880928	7.93515	9.15467	0.00526615	1
2617	ENSG00000106105	GARS1	glycyl-tRNA synthetase 1	0.923418	4.66219	9.11887	0.00534411	1
1545	ENSG00000138061	CYP1B1	cytochrome P450 family 1 subfamily B member 1	1.9339	4.6466	9.11395	0.00535494	1
101927762	ENSG00000229869	LARP4B-DT	LARP4B divergent transcript	2.97066	0.68324	9.61144	0.00541114	1
105375816	NA	LOC105375816	putative coiled-coil domain-containing protein 144C	2.97066	0.68324	9.61144	0.00541114	1
79023	ENSG00000075188	NUP37	nucleoporin 37	0.993204	4.71205	9.0712	0.00544988	1
8895	ENSG00000085719	CPNE3	copine 3	0.901621	5.43517	9.03534	0.00553095	1
253152	ENSG00000172031	EPHX4	epoxide hydrolase 4	2.92886	0.865173	8.99078	0.00563351	1
6775	ENSG00000138378	STAT4	signal transducer and activator of transcription 4	1.48314	2.98851	8.98977	0.00563585	1
728377	NA	ARHGEF34P	Rho guanine nucleotide exchange factor 34, pseudogene	1.15034	4.09528	8.98709	0.00564208	1
23624	ENSG00000142273	CBLC	Cbl proto-oncogene C	-4.0416	1.25474	9.23284	0.0056543	1
644861	NA	NBPF13P	NBPF member 13, pseudogene	3.34458	0.9507	8.96195	0.00570094	1
84696	ENSG00000143994	ABHD1	abhydrolase domain containing 1	3.02534	0.688045	9.46948	0.00570527	1
4684	ENSG00000149294	NCAM1	neural cell adhesion molecule 1	3.04	0.689256	9.41889	0.00581433	1
387715	ENSG00000254636	ARMS2	age-related maculopathy susceptibility 2	2.0089	2.73155	8.81411	0.00606089	1
100170226	NA	SNAR-C3	small NF90 (ILF3) associated RNA C3	1.07519	8.38912	8.79144	0.00611823	1
10314	ENSG00000115365	LANCL1	LanC like glutathione S-transferase 1	-0.918861	4.73008	8.76834	0.00617726	1
51115	ENSG00000176623	RMDN1	regulator of microtubule dynamics 1	-1.69289	3.21824	8.74373	0.00624084	1
6060	ENSG00000207389	RNU1-4	RNA, U1 small nuclear 4	1.36601	3.6769	8.74055	0.0062491	1
84210	ENSG00000260691	ANKRD20A1	ankyrin repeat domain 20 family member A1	1.75224	2.1657	8.73974	0.0062512	1
3911	ENSG00000130702	LAMA5	laminin subunit alpha 5	-1.19179	3.79758	8.73475	0.00626421	1
284232	NA	ANKRD20A9P	ankyrin repeat domain 20 family member A9, pseudogene	1.23395	4.46047	8.73379	0.0062667	1
440482	ENSG00000290972	ANKRD20A5P	ankyrin repeat domain 20 family member A5, pseudogene	1.27613	5.2668	8.68251	0.0064021	1
100506990	NA	FAM86B2-DT	FAM86B2 divergent transcript	1.83253	2.13789	8.67128	0.00643215	1
10058	ENSG00000115657	ABCB6	ATP binding cassette subfamily B member 6 (Langereis blood group)	-3.0267	1.67376	8.6467	0.00649852	1
2266	ENSG00000171557	FGG	fibrinogen gamma chain	3.35696	1.47543	8.6434	0.00650747	1
5510	ENSG00000115685	PPP1R7	protein phosphatase 1 regulatory subunit 7	0.905015	6.04415	8.62336	0.00656221	1
8649	ENSG00000109270	LAMTOR3	late endosomal/lysosomal adaptor, MAPK and MTOR activator 3	0.875455	5.47895	8.58642	0.0066644	1
4935	ENSG00000101850	GPR143	G protein-coupled receptor 143	-2.21246	2.89487	8.5753	0.0066955	1
6139	ENSG00000265681	RPL17	ribosomal protein L17	-1.02294	4.23833	8.56696	0.00671893	1
29951	ENSG00000165966	PDZRN4	PDZ domain containing ring finger 4	-3.76466	1.1478	8.75717	0.00682721	1
9482	ENSG00000170310	STX8	syntaxin 8	0.836592	6.25161	8.50733	0.00688905	1
54583	ENSG00000135766	EGLN1	egl-9 family hypoxia inducible factor 1	-1.4455	3.4827	8.49197	0.00693362	1
1346	ENSG00000161281	COX7A1	cytochrome c oxidase subunit 7A1	1.06823	4.68876	8.45273	0.00704892	1
653583	ENSG00000176531	PHLDB3	pleckstrin homology like domain family B member 3	-4.21576	1.33399	8.65177	0.00712177	1
387758	ENSG00000176971	FIBIN	fin bud initiation factor homolog	2.46158	1.50313	8.41749	0.00715425	1
7203	ENSG00000163468	CCT3	chaperonin containing TCP1 subunit 3	0.981737	6.80781	8.4152	0.00716116	1
10382	ENSG00000104833	TUBB4A	tubulin beta 4A class IVa	3.15752	0.718877	8.8588	0.00718925	1
101928455	ENSG00000232606	LINC01412	long intergenic non-protein coding RNA 1412	3.15752	0.718877	8.8588	0.00718925	1
51297	ENSG00000198183	BPIFA1	BPI fold containing family A member 1	3.45104	0.75016	8.81877	0.00730055	1
26146	ENSG00000204104	TRAF3IP1	TRAF3 interacting protein 1	1.19477	3.28421	8.32778	0.0074302	1
100170219	NA	SNAR-C4	small NF90 (ILF3) associated RNA C4	1.05627	8.34384	8.32381	0.0074427	1
127579	ENSG00000163354	DCST2	DC-STAMP domain containing 2	3.03044	1.22032	8.29909	0.0075209	1
54979	ENSG00000133328	PLAAT2	phospholipase A and acyltransferase 2	3.64109	0.76736	8.70742	0.00762023	1
3005	ENSG00000189060	H1-0	H1.0 linker histone	-0.929706	4.80936	8.2637	0.0076344	1
84456	ENSG00000198945	L3MBTL3	L3MBTL histone methyl-lysine binding protein 3	1.2419	3.61076	8.23677	0.00772201	1
120425	ENSG00000160593	JAML	junction adhesion molecule like	2.10795	2.88737	8.22352	0.00776553	1
2207	ENSG00000158869	FCER1G	Fc epsilon receptor Ig	0.863194	6.60398	8.21995	0.00777731	1
100133315	ENSG00000254469	XNDC1N	XRCC1 N-terminal domain containing 1, N-terminal like	3.28109	1.13312	8.20431	0.00782908	1
5867	ENSG00000168118	RAB4A	RAB4A, member RAS oncogene family	1.43252	3.4317	8.19959	0.0078448	1
101954267	ENSG00000207205	RNVU1-15	RNA, variant U1 small nuclear 15	2.88808	0.675372	8.63174	0.00784636	1
54997	ENSG00000088992	TESC	tescalcin	2.88808	0.675372	8.63174	0.00784636	1
131566	ENSG00000057019	DCBLD2	discoidin, CUB and LCCL domain containing 2	-1.40674	3.11866	8.19188	0.00787054	1
4067	ENSG00000254087	LYN	LYN proto-oncogene, Src family tyrosine kinase	-0.96622	6.18848	8.17731	0.0079194	1
220980	ENSG00000224812	TMEM72-AS1	TMEM72 antisense RNA 1	2.90716	0.677117	8.59798	0.00794965	1
22850	ENSG00000101544	ADNP2	ADNP homeobox 2	0.969694	3.77745	8.16239	0.00796977	1
121506	ENSG00000139055	ERP27	endoplasmic reticulum protein 27	-4.6834	1.5512	8.37264	0.00797145	1
100189206	NA	TRG-TCC3-1	tRNA-Gly (anticodon TCC) 3-1	2.95139	0.681491	8.58266	0.00799699	1
80759	ENSG00000135314	KHDC1	KH domain containing 1	0.896578	4.90146	8.12197	0.00810802	1
8520	ENSG00000128708	HAT1	histone acetyltransferase 1	0.822163	5.77447	8.11964	0.00811606	1
148824	ENSG00000196242	GCSAML-AS1	GCSAML antisense RNA 1	2.99001	0.684991	8.52768	0.00816955	1
378807	ENSG00000188782	CATSPER4	cation channel sperm associated 4	3.03433	0.689376	8.52549	0.00817652	1
448831	ENSG00000205097	FRG2	FSHD region gene 2	2.94188	0.680159	8.51726	0.00820274	1
202134	NA	FAM153B	protein FAM153B	2.94188	0.680159	8.51726	0.00820274	1
84848	NA	MIR503HG	MIR503 host gene	-1.25573	4.86281	8.09063	0.00821698	1
10073	ENSG00000169371	SNUPN	snurportin 1	0.992091	4.44134	8.05816	0.00833159	1
3484	ENSG00000146678	IGFBP1	insulin like growth factor binding protein 1	-4.56393	2.64614	8.03522	0.00841361	1
83657	ENSG00000168589	DYNLRB2	dynein light chain roadblock-type 2	2.07707	2.08777	8.02772	0.00844061	1
5806	ENSG00000163661	PTX3	pentraxin 3	-3.13426	3.53779	8.01213	0.00849704	1
254048	ENSG00000157741	UBN2	ubinuclein 2	0.985187	3.84915	7.98938	0.00858013	1
653316	ENSG00000204677	FAM153CP	protein FAM153C	3.06106	0.691103	8.39993	0.00858669	1
101927994	ENSG00000224559	LINC01087	long intergenic non-protein coding RNA 1087	3.14541	0.699023	8.37963	0.00865512	1
8349	ENSG00000184678	H2BC21	H2B clustered histone 21	-0.93456	7.73172	7.9593	0.00869135	1
115286	ENSG00000144741	SLC25A26	solute carrier family 25 member 26	-1.31834	4.13793	7.95519	0.00870667	1
6866	ENSG00000166863	TAC3	tachykinin precursor 3	3.05105	9.0972	7.93829	0.00876996	1
4724	ENSG00000164258	NDUFS4	NADH:ubiquinone oxidoreductase subunit S4	0.762691	7.07808	7.93732	0.0087736	1
100126781	NA	SNAR-F	small NF90 (ILF3) associated RNA F	2.70859	1.57263	7.93351	0.00878795	1
22995	ENSG00000103995	CEP152	centrosomal protein 152	1.1332	3.87631	7.88324	0.00897962	1
340419	ENSG00000147655	RSPO2	R-spondin 2	-3.08114	1.70157	7.88283	0.00898122	1
729171	ENSG00000229089	ANKRD20A8P	ankyrin repeat domain 20 family member A8, pseudogene	1.62362	2.57872	7.84865	0.00911415	1
59339	ENSG00000169499	PLEKHA2	pleckstrin homology domain containing A2	-1.53081	3.09858	7.84529	0.00912733	1
51274	ENSG00000109787	KLF3	KLF transcription factor 3	-0.988981	4.22357	7.83826	0.00915502	1
283922	ENSG00000290890	PDPR2P	pyruvate dehydrogenase phosphatase regulatory subunit 2, pseudogene	-4.3585	1.40937	7.9784	0.00936727	1
105376057	NA	LOC105376057	protein FRG1B-like	1.12342	3.28263	7.73128	0.00958728	1
84251	ENSG00000118473	SGIP1	SH3GL interacting endocytic adaptor 1	3.1996	1.07806	7.68	0.00980229	1
64328	ENSG00000132953	XPO4	exportin 4	-1.48144	3.15081	7.65701	0.00990039	1
8936	ENSG00000112290	WASF1	WASP family member 1	-3.78623	1.14584	7.83713	0.00993115	1
5521	ENSG00000156475	PPP2R2B	protein phosphatase 2 regulatory subunit Bbeta	-2.0752	2.53283	7.6177	0.0100707	1
83734	ENSG00000152348	ATG10	autophagy related 10	1.2825	3.48525	7.61422	0.0100859	1
4199	ENSG00000065833	ME1	malic enzyme 1	2.51776	1.30076	7.59406	0.0101746	1
144715	ENSG00000151164	RAD9B	RAD9 checkpoint clamp component B	3.0178	1.07433	7.58394	0.0102194	1
81930	ENSG00000121621	KIF18A	kinesin family member 18A	-2.82055	1.96342	7.58051	0.0102346	1
890	ENSG00000145386	CCNA2	cyclin A2	-2.4879	1.77092	7.56679	0.0102959	1
84364	ENSG00000149182	ARFGAP2	ADP ribosylation factor GTPase activating protein 2	1.13444	3.69201	7.52034	0.0105062	1
53938	ENSG00000240344	PPIL3	peptidylprolyl isomerase like 3	1.11421	4.3429	7.52013	0.0105071	1
375133	ENSG00000183506	PI4KAP2	phosphatidylinositol 4-kinase alpha pseudogene 2	-0.764289	5.56119	7.50776	0.0105639	1
1794	ENSG00000134516	DOCK2	dedicator of cytokinesis 2	-3.84271	1.16841	7.68325	0.0105882	1
254427	ENSG00000148426	PROSER2	proline and serine rich 2	-2.94199	1.6067	7.49769	0.0106104	1
4059	ENSG00000187244	BCAM	basal cell adhesion molecule (Lutheran blood group)	-1.16085	3.56123	7.49682	0.0106145	1
51534	ENSG00000009844	VTA1	vesicle trafficking 1	0.813204	5.44451	7.4404	0.0108791	1
4974	ENSG00000126861	OMG	oligodendrocyte myelin glycoprotein	2.50809	0.930402	7.43444	0.0109075	1
101926971	ENSG00000230317	LINC01284	long intergenic non-protein coding RNA 1284	-4.05719	1.24945	7.5519	0.011187	1
23194	ENSG00000183580	FBXL7	F-box and leucine rich repeat protein 7	-3.97155	1.21213	7.55037	0.0111942	1
10574	ENSG00000135624	CCT7	chaperonin containing TCP1 subunit 7	-0.780808	6.14704	7.3634	0.0112521	1
55795	ENSG00000126226	PCID2	PCI domain containing 2	1.21705	4.54819	7.35468	0.0112952	1
56963	ENSG00000182175	RGMA	repulsive guidance molecule BMP co-receptor a	-3.50943	1.04288	7.52013	0.0113374	1
65982	ENSG00000121413	ZSCAN18	zinc finger and SCAN domain containing 18	-0.723038	5.42899	7.34086	0.0113639	1
56242	ENSG00000256771	ZNF253	zinc finger protein 253	1.68878	2.35343	7.29528	0.0115936	1
52	ENSG00000143727	ACP1	acid phosphatase 1	0.815985	6.47361	7.27822	0.0116809	1
1894	ENSG00000114346	ECT2	epithelial cell transforming 2	0.89961	4.31471	7.27609	0.0116919	1
339483	ENSG00000291132	MTMR9LP	myotubularin related protein 9 like, pseudogene	2.82511	0.669266	7.59258	0.0118395	1
1089	ENSG00000105352	CEACAM4	CEA cell adhesion molecule 4	2.82511	0.669266	7.59258	0.0118395	1
6444	ENSG00000170624	SGCD	sarcoglycan delta	2.82511	0.669266	7.59258	0.0118395	1
651302	ENSG00000226314	ZKSCAN8P1	ZKSCAN8 pseudogene 1	2.82511	0.669266	7.59258	0.0118395	1
2771	ENSG00000114353	GNAI2	G protein subunit alpha i2	-0.780355	6.19773	7.24434	0.0118564	1
19	ENSG00000165029	ABCA1	ATP binding cassette subfamily A member 1	-0.810204	5.93062	7.22783	0.011943	1
11276	ENSG00000275066	SYNRG	synergin gamma	-0.844671	4.57834	7.21187	0.0120273	1
195977	ENSG00000274209	ANTXRL	ANTXR like	3.01492	0.687623	7.55148	0.0120385	1
100509894	ENSG00000235903	CPB2-AS1	CPB2 antisense RNA 1	3.01492	0.687623	7.55148	0.0120385	1
56344	ENSG00000105507	CABP5	calcium binding protein 5	3.01492	0.687623	7.55148	0.0120385	1
340286	ENSG00000164556	FAM183BP	acyloxyacyl hydrolase (neutrophil)	3.01492	0.687623	7.55148	0.0120385	1
81501	ENSG00000164935	DCSTAMP	dendrocyte expressed seven transmembrane protein	3.01492	0.687623	7.55148	0.0120385	1
388886	ENSG00000178026	LRRC75B	leucine rich repeat containing 75B	2.6328	0.790632	7.20514	0.0120631	1
1773	ENSG00000213918	DNASE1	deoxyribonuclease 1	2.41755	1.194	7.18841	0.0121525	1
114571	ENSG00000149742	SLC22A9	solute carrier family 22 member 9	3.07338	0.692888	7.52026	0.0121921	1
101927980	NA	SLC14A2-AS1	SLC14A2 antisense RNA 1	3.07338	0.692888	7.52026	0.0121921	1
130497	ENSG00000143867	OSR1	odd-skipped related transcription factor 1	3.07338	0.692888	7.52026	0.0121921	1
27296	ENSG00000124251	TP53TG5	TP53 target 5	3.07338	0.692888	7.52026	0.0121921	1
55888	ENSG00000196345	ZKSCAN7	zinc finger with KRAB and SCAN domains 7	3.07338	0.692888	7.52026	0.0121921	1
285780	ENSG00000216863	LY86-AS1	LY86 antisense RNA 1	3.07338	0.692888	7.52026	0.0121921	1
4224	ENSG00000112818	MEP1A	meprin A subunit alpha	3.07338	0.692888	7.52026	0.0121921	1
4157	ENSG00000258839	MC1R	melanocortin 1 receptor	1.43315	3.5873	7.17913	0.0122024	1
5436	ENSG00000168002	POLR2G	RNA polymerase II subunit G	0.675144	6.12247	7.17152	0.0122435	1
54996	ENSG00000117791	MTARC2	mitochondrial amidoxime reducing component 2	-1.47929	2.84418	7.15639	0.0123256	1
10399	ENSG00000204628	RACK1	receptor for activated C kinase 1	0.809313	9.78734	7.15511	0.0123326	1
102724541	NA	NA	NA	2.60757	0.814859	7.14913	0.0123652	1
101928304	ENSG00000232310	LINC03002	long intergenic non-protein coding RNA 3002	2.91692	0.843346	7.13125	0.0124634	1
3304	ENSG00000204388	HSPA1B	heat shock protein family A (Hsp70) member 1B	-1.39512	7.99666	7.10889	0.0125874	1
84306	ENSG00000126249	PDCD2L	programmed cell death 2 like	1.84061	2.12631	7.10584	0.0126044	1
5588	ENSG00000065675	PRKCQ	protein kinase C theta	3.18193	0.702098	7.43753	0.0126098	1
100874323	ENSG00000253187	HOXA10-AS	HOXA10 antisense RNA	3.18193	0.702098	7.43753	0.0126098	1
83891	ENSG00000109762	SNX25	sorting nexin 25	-2.05639	2.3741	7.10184	0.0126268	1
100506881	ENSG00000236753	MKLN1-AS	MKLN1 antisense RNA	2.69388	0.800259	7.09527	0.0126636	1
29799	ENSG00000100027	YPEL1	yippee like 1	-2.26629	2.00703	7.09087	0.0126883	1
51185	ENSG00000113851	CRBN	cereblon	0.895815	5.42107	7.09024	0.0126918	1
6275	ENSG00000196154	S100A4	S100 calcium binding protein A4	1.06922	6.41438	7.08739	0.0127079	1
9694	ENSG00000104412	EMC2	ER membrane protein complex subunit 2	0.753373	6.99512	7.07797	0.0127611	1
346007	ENSG00000188107	EYS	eyes shut homolog	-3.44504	1.0266	7.23886	0.0127702	1
94030	ENSG00000131409	LRRC4B	leucine rich repeat containing 4B	-3.51894	1.05631	7.22894	0.0128243	1
117157	ENSG00000198574	SH2D1B	SH2 domain containing 1B	3.22793	0.705763	7.39232	0.0128448	1
3948	ENSG00000166796	LDHC	lactate dehydrogenase C	3.22793	0.705763	7.39232	0.0128448	1
101927501	ENSG00000224294	PINCR	p53-induced noncoding RNA	3.22793	0.705763	7.39232	0.0128448	1
64856	ENSG00000179403	VWA1	von Willebrand factor A domain containing 1	-1.09759	5.1814	7.06105	0.0128572	1
3814	ENSG00000170498	KISS1	KiSS-1 metastasis suppressor	-1.68454	9.32274	7.05901	0.0128688	1
644538	ENSG00000184785	SMIM10	small integral membrane protein 10	-3.51878	1.05587	7.21308	0.0129113	1
8945	ENSG00000166167	BTRC	beta-transducin repeat containing E3 ubiquitin protein ligase	0.915739	4.19511	7.04795	0.0129322	1
5265	ENSG00000197249	SERPINA1	serpin family A member 1	0.889856	3.87095	7.03112	0.0130292	1
348262	ENSG00000225663	MCRIP1	MAPK regulated corepressor interacting protein 1	-0.770673	5.39312	7.02695	0.0130533	1
8568	ENSG00000160214	RRP1	ribosomal RNA processing 1	-2.28164	2.16544	7.0268	0.0130542	1
1359	ENSG00000163751	CPA3	carboxypeptidase A3	2.96045	1.14666	7.01414	0.0131279	1
39	ENSG00000120437	ACAT2	acetyl-CoA acetyltransferase 2	1.84702	2.94284	7.00846	0.0131611	1
8364	ENSG00000197061	H4C3	H4 clustered histone 3	1.10068	7.81339	7.00474	0.0131829	1
2350	ENSG00000165457	FOLR2	folate receptor beta	0.850896	6.09595	6.99388	0.0132467	1
1805	ENSG00000143196	DPT	dermatopontin	1.09033	4.84167	6.99346	0.0132492	1
29102	ENSG00000113360	DROSHA	drosha ribonuclease III	-1.14583	3.59263	6.99269	0.0132538	1
23305	ENSG00000164398	ACSL6	acyl-CoA synthetase long chain family member 6	2.89861	0.845609	6.99058	0.0132662	1
54987	ENSG00000162384	CZIB	CXXC motif containing zinc binding protein	0.969167	4.37739	6.97741	0.0133442	1
6251	ENSG00000148484	RSU1	Ras suppressor protein 1	1.00428	7.01881	6.97641	0.0133501	1
644246	ENSG00000214401	KANSL1-AS1	KANSL1 antisense RNA 1	-2.47251	2.31033	6.96895	0.0133946	1
79022	ENSG00000134291	TMEM106C	transmembrane protein 106C	0.832023	4.75225	6.95328	0.0134884	1
6504	ENSG00000117090	SLAMF1	signaling lymphocytic activation molecule family member 1	-3.11231	1.65844	6.94383	0.0135454	1
1366	ENSG00000181885	CLDN7	claudin 7	-0.893066	6.00515	6.9428	0.0135516	1
2162	ENSG00000124491	F13A1	coagulation factor XIII A chain	0.901138	7.10758	6.9368	0.0135879	1
203111	ENSG00000177459	ERICH5	glutamate rich 5	-1.99562	2.64854	6.93208	0.0136165	1
1666	ENSG00000104325	DECR1	2,4-dienoyl-CoA reductase 1	1.14854	5.46738	6.92479	0.0136609	1
1152	ENSG00000166165	CKB	creatine kinase B	-3.70978	1.1243	7.07243	0.0137114	1
2257	ENSG00000114279	FGF12	fibroblast growth factor 12	-1.52661	3.76549	6.90949	0.0137545	1
123016	ENSG00000165533	TTC8	tetratricopeptide repeat domain 8	2.21073	1.795	6.90276	0.0137959	1
150696	ENSG00000155066	PROM2	prominin 2	-1.32541	3.02141	6.8967	0.0138333	1
55798	ENSG00000165055	METTL2B	methyltransferase 2B, tRNA N3-cytidine	1.00653	4.56971	6.87741	0.0139531	1
6144	ENSG00000122026	RPL21	ribosomal protein L21	-0.854234	7.77797	6.83419	0.0142256	1
26871	ENSG00000206652	RNU1-1	RNA, U1 small nuclear 1	1.17941	3.62241	6.82312	0.0142963	1
105373090	NA	NA	NA	2.54945	1.02993	6.81281	0.0143625	1
51639	ENSG00000115128	SF3B6	splicing factor 3b subunit 6	0.771922	6.38529	6.8058	0.0144077	1
27253	ENSG00000118946	PCDH17	protocadherin 17	-2.49143	1.78106	6.80268	0.0144279	1
100129424	NA	RPL19P12	ribosomal protein L19 pseudogene 12	0.870031	5.31978	6.80145	0.0144359	1
220004	ENSG00000162148	SAXO4	stabilizer of axonemal microtubules 4	2.52799	0.937715	6.79429	0.0144823	1
7056	ENSG00000178726	THBD	thrombomodulin	-0.834987	5.49457	6.79032	0.0145081	1
10160	ENSG00000152767	FARP1	FERM, ARH/RhoGEF and pleckstrin domain protein 1	-2.09211	1.87172	6.78873	0.0145185	1
79895	ENSG00000104043	ATP8B4	ATPase phospholipid transporting 8B4 (putative)	-1.93753	2.18889	6.78145	0.014566	1
4236	ENSG00000140259	MFAP1	microfibril associated protein 1	0.681003	5.92593	6.78063	0.0145714	1
4481	ENSG00000038945	MSR1	macrophage scavenger receptor 1	0.951958	3.63935	6.77314	0.0146204	1
84312	ENSG00000100916	BRMS1L	BRMS1 like transcriptional repressor	-1.2146	3.36956	6.76411	0.0146799	1
84823	ENSG00000176619	LMNB2	lamin B2	-0.889601	4.69298	6.74413	0.0148123	1
56287	ENSG00000169605	GKN1	gastrokine 1	2.65103	3.0613	6.74267	0.014822	1
3431	ENSG00000135899	SP110	SP110 nuclear body protein	0.971434	4.43763	6.7419	0.0148272	1
2296	ENSG00000054598	FOXC1	forkhead box C1	-1.4019	2.95498	6.7401	0.0148392	1
57213	ENSG00000123178	SPRYD7	SPRY domain containing 7	-1.02935	4.32748	6.72835	0.0149178	1
1646	ENSG00000151632	AKR1C2	aldo-keto reductase family 1 member C2	2.46872	1.12804	6.71478	0.0150092	1
100874239	ENSG00000226272	ARHGAP26-AS1	ARHGAP26 antisense RNA 1	2.68007	0.809467	6.71269	0.0150233	1
54681	ENSG00000178467	P4HTM	prolyl 4-hydroxylase, transmembrane	-1.1534	4.27128	6.69181	0.0151652	1
10871	ENSG00000167850	CD300C	CD300c molecule	2.54633	0.944541	6.66878	0.0153235	1
203569	ENSG00000234068	PAGE2	PAGE family member 2	1.69438	2.99387	6.64769	0.01547	1
9641	ENSG00000263528	IKBKE	inhibitor of nuclear factor kappa B kinase subunit epsilon	2.30228	1.20387	6.63571	0.015554	1
5617	ENSG00000172179	PRL	prolactin	-6.33878	2.64005	6.77839	0.0155669	1
54496	ENSG00000132600	PRMT7	protein arginine methyltransferase 7	-2.69953	1.95102	6.62909	0.0156005	1
55717	ENSG00000120008	WDR11	WD repeat domain 11	1.11025	3.95626	6.61401	0.0157072	1
100507462	ENSG00000279968	CCDC28A-AS1	CCDC28A antisense RNA 1	2.4464	0.780229	6.60285	0.0157867	1
5066	ENSG00000145730	PAM	peptidylglycine alpha-amidating monooxygenase	-0.744713	6.98114	6.60032	0.0158048	1
1371	ENSG00000080819	CPOX	coproporphyrinogen oxidase	-0.938207	4.69238	6.59714	0.0158275	1
245812	ENSG00000166997	CNPY4	canopy FGF signaling regulator 4	1.04214	3.36565	6.59166	0.0158668	1
4124	ENSG00000112893	MAN2A1	mannosidase alpha class 2A member 1	-0.79711	5.86699	6.58327	0.0159272	1
27250	ENSG00000150593	PDCD4	programmed cell death 4	0.772905	6.96861	6.55732	0.0161155	1
130589	ENSG00000143891	GALM	galactose mutarotase	-1.43952	3.52992	6.55591	0.0161258	1
81688	ENSG00000112308	C6orf62	chromosome 6 open reading frame 62	0.78885	5.976	6.54782	0.016185	1
93594	ENSG00000156787	TBC1D31	TBC1 domain family member 31	-3.99548	1.23364	6.67736	0.0162672	1
3710	ENSG00000096433	ITPR3	inositol 1,4,5-trisphosphate receptor type 3	2.11973	1.42117	6.53482	0.0162807	1
4061	ENSG00000160932	LY6E	lymphocyte antigen 6 family member E	-1.01956	5.01686	6.5284	0.0163282	1
5138	ENSG00000186642	PDE2A	phosphodiesterase 2A	2.66465	0.797731	6.51293	0.0164432	1
55008	ENSG00000138642	HERC6	HECT and RLD domain containing E3 ubiquitin protein ligase family member 6	-2.26729	1.94946	6.50667	0.0164901	1
114876	ENSG00000141447	OSBPL1A	oxysterol binding protein like 1A	-1.60789	2.8725	6.50576	0.0164969	1
4188	ENSG00000112559	MDFI	MyoD family inhibitor	-1.59076	2.28514	6.50144	0.0165293	1
57188	ENSG00000156218	ADAMTSL3	ADAMTS like 3	-2.51444	1.75985	6.4991	0.0165469	1
2783	ENSG00000172354	GNB2	G protein subunit beta 2	-0.933228	5.86141	6.48643	0.0166424	1
57690	ENSG00000078687	TNRC6C	trinucleotide repeat containing adaptor 6C	-3.77303	1.13113	6.61629	0.0167073	1
374650	NA	GOLGA6L5P	golgin A6 family like 5, pseudogene	1.62738	2.23092	6.45092	0.0169134	1
79400	ENSG00000290203	NOX5	NADPH oxidase 5	2.44599	0.786585	6.4466	0.0169467	1
55567	ENSG00000158486	DNAH3	dynein axonemal heavy chain 3	2.72948	1.30411	6.44586	0.0169524	1
22	ENSG00000131269	ABCB7	ATP binding cassette subfamily B member 7	-1.25839	3.66656	6.44428	0.0169646	1
134430	ENSG00000134987	WDR36	WD repeat domain 36	1.26721	3.26617	6.44367	0.0169693	1
441501	NA	LINC00891	long intergenic non-protein coding RNA 891	2.64277	0.790675	6.43583	0.01703	1
100132741	NA	LOC100132741	uncharacterized LOC100132741	2.64277	0.790675	6.43583	0.01703	1
5831	ENSG00000183010	PYCR1	pyrroline-5-carboxylate reductase 1	-3.73814	1.14075	6.56014	0.0171236	1
255187	ENSG00000250072	SH3TC2-DT	SH3TC2 divergent transcript	1.62048	1.85051	6.41979	0.017155	1
4488	ENSG00000120149	MSX2	msh homeobox 2	-0.697267	4.84824	6.41688	0.0171778	1
63931	ENSG00000120333	MRPS14	mitochondrial ribosomal protein S14	0.638068	6.01195	6.41169	0.0172184	1
65008	ENSG00000169288	MRPL1	mitochondrial ribosomal protein L1	0.721907	6.29232	6.40366	0.0172817	1
116969	ENSG00000167311	ART5	ADP-ribosyltransferase 5	-4.04461	1.25425	6.53639	0.0173032	1
84300	ENSG00000137288	UQCC2	ubiquinol-cytochrome c reductase complex assembly factor 2	0.684254	6.49425	6.39695	0.0173346	1
170627	ENSG00000171405	XAGE5	X antigen family member 5	0.729315	6.99948	6.39346	0.0173622	1
347344	ENSG00000197779	ZNF81	zinc finger protein 81	1.70071	1.91068	6.39123	0.0173799	1
51171	ENSG00000087076	HSD17B14	hydroxysteroid 17-beta dehydrogenase 14	-2.3825	1.7612	6.38995	0.0173901	1
100170218	NA	SNAR-C2	small NF90 (ILF3) associated RNA C2	0.966632	7.40885	6.38359	0.0174406	1
81558	ENSG00000121104	FAM117A	family with sequence similarity 117 member A	-3.64091	1.08663	6.5106	0.0175005	1
4593	ENSG00000030304	MUSK	muscle associated receptor tyrosine kinase	-3.7101	1.12342	6.50468	0.0175461	1
554203	ENSG00000225470	JPX	JPX transcript, XIST activator	0.985269	3.21516	6.36774	0.0175674	1
79974	ENSG00000106034	CPED1	cadherin like and PC-esterase domain containing 1	1.39089	2.79547	6.34742	0.0177313	1
10040	ENSG00000141198	TOM1L1	target of myb1 like 1 membrane trafficking protein	1.72959	3.24068	6.33496	0.0178327	1
3151	ENSG00000198830	HMGN2	high mobility group nucleosomal binding domain 2	-0.700329	6.86911	6.32606	0.0179054	1
8731	ENSG00000101654	RNMT	RNA guanine-7 methyltransferase	0.695667	5.58554	6.32522	0.0179123	1
55521	ENSG00000152503	TRIM36	tripartite motif containing 36	2.28146	1.18065	6.31885	0.0179646	1
23397	ENSG00000121152	NCAPH	non-SMC condensin I complex subunit H	-1.97571	2.23029	6.30849	0.0180501	1
54621	ENSG00000176834	VSIG10	V-set and immunoglobulin domain containing 10	-0.77079	4.4717	6.3063	0.0180682	1
374879	ENSG00000196110	ZNF699	zinc finger protein 699	2.66604	0.800859	6.29692	0.018146	1
8611	ENSG00000067113	PLPP1	phospholipid phosphatase 1	-2.05487	2.28203	6.29127	0.0181931	1
23576	ENSG00000153904	DDAH1	dimethylarginine dimethylaminohydrolase 1	-1.01175	4.08071	6.29059	0.0181987	1
26047	ENSG00000174469	CNTNAP2	contactin associated protein 2	-1.02367	3.91784	6.28969	0.0182063	1
355	ENSG00000026103	FAS	Fas cell surface death receptor	-2.95966	1.60093	6.27514	0.0183281	1
619505	ENSG00000199293	SNORA21	small nucleolar RNA, H/ACA box 21	1.43755	3.68975	6.27499	0.0183294	1
117531	ENSG00000165091	TMC1	transmembrane channel like 1	1.00799	3.96749	6.27102	0.0183629	1
143888	ENSG00000178202	POGLUT3	protein O-glucosyltransferase 3	-0.669536	7.01857	6.24147	0.0186137	1
26869	ENSG00000207513	RNU1-3	RNA, U1 small nuclear 3	1.19587	3.62174	6.23966	0.0186291	1
8504	ENSG00000034693	PEX3	peroxisomal biogenesis factor 3	0.92155	5.70004	6.23682	0.0186535	1
9730	ENSG00000145041	DCAF1	DDB1 and CUL4 associated factor 1	0.803152	4.41383	6.23328	0.0186838	1
90342	ENSG00000249715	FER1L5	fer-1 like family member 5	-3.52037	1.05591	6.35886	0.0187131	1
440093	ENSG00000188375	H3-5	H3.5 histone	-0.788764	5.60224	6.22725	0.0187357	1
441430	ENSG00000291287	ANKRD20A2P	ankyrin repeat domain 20 family member A2, pseudogene	1.58555	2.34427	6.22249	0.0187767	1
55757	ENSG00000102595	UGGT2	UDP-glucose glycoprotein glucosyltransferase 2	-1.06368	4.38985	6.21169	0.0188702	1
5372	ENSG00000100417	PMM1	phosphomannomutase 1	-1.18332	3.67135	6.20216	0.0189532	1
7289	ENSG00000078246	TULP3	TUB like protein 3	1.04803	3.61287	6.19319	0.0190316	1
101927854	NA	THRB-AS2	THRB antisense RNA 2	1.36259	2.67185	6.19115	0.0190495	1
29899	ENSG00000121957	GPSM2	G protein signaling modulator 2	-2.63825	1.89063	6.18233	0.0191271	1
101101772	ENSG00000235180	LINC00601	long intergenic non-protein coding RNA 601	2.56545	0.791268	6.1815	0.0191343	1
945	ENSG00000105383	CD33	CD33 molecule	1.62565	2.03611	6.17676	0.0191761	1
60481	ENSG00000012660	ELOVL5	ELOVL fatty acid elongase 5	-0.741596	5.05809	6.16934	0.0192419	1
115708	ENSG00000166166	TRMT61A	tRNA methyltransferase 61A	-2.74991	1.4708	6.16687	0.0192638	1
9383	ENSG00000270641	TSIX	TSIX transcript, XIST antisense RNA	1.69341	1.76898	6.1548	0.0193713	1
114785	ENSG00000166987	MBD6	methyl-CpG binding domain protein 6	1.27159	2.464	6.14983	0.0194157	1
283345	ENSG00000240370	RPL13P5	ribosomal protein L13 pseudogene 5	2.30714	0.883639	6.14924	0.019421	1
388743	ENSG00000203697	CAPN8	calpain 8	2.73559	1.18643	6.14917	0.0194217	1
1999	ENSG00000163435	ELF3	E74 like ETS transcription factor 3	-0.660024	5.42752	6.14508	0.0194583	1
3163	ENSG00000103415	HMOX2	heme oxygenase 2	0.975341	3.96796	6.14165	0.0194891	1
9723	ENSG00000170381	SEMA3E	semaphorin 3E	1.9557	1.83799	6.13913	0.0195118	1
100128822	ENSG00000261455	LINC01003	long intergenic non-protein coding RNA 1003	-1.39318	3.13889	6.13581	0.0195418	1
100170223	NA	SNAR-C5	small NF90 (ILF3) associated RNA C5	0.895455	7.36398	6.13241	0.0195724	1
10799	ENSG00000124787	RPP40	ribonuclease P/MRP subunit p40	1.68463	2.32196	6.12055	0.01968	1
138151	ENSG00000148411	NACC2	NACC family member 2	-3.19645	0.951739	6.24318	0.0196999	1
7984	ENSG00000050327	ARHGEF5	Rho guanine nucleotide exchange factor 5	0.700681	5.49827	6.11189	0.0197589	1
53	ENSG00000134575	ACP2	acid phosphatase 2, lysosomal	-0.777865	6.54412	6.10698	0.0198038	1
105377866	NA	NA	NA	-3.39025	1.01498	6.22257	0.0198818	1
2686	ENSG00000131067	GGT7	gamma-glutamyltransferase 7	-3.52632	1.06604	6.21332	0.019964	1
5431	ENSG00000047315	POLR2B	RNA polymerase II subunit B	0.798663	5.04393	6.08949	0.0199646	1
51528	ENSG00000050130	JKAMP	JNK1/MAPK8 associated membrane protein	0.895624	4.52338	6.08286	0.0200259	1
283316	ENSG00000177675	CD163L1	CD163 molecule like 1	1.10223	3.26774	6.08149	0.0200385	1
9103	NA	FCGR2C	Fc gamma receptor IIc (gene/pseudogene)	0.783809	6.82122	6.07185	0.0201281	1
2153	ENSG00000198734	F5	coagulation factor V	-0.750534	6.76012	6.06769	0.020167	1
29093	ENSG00000082515	MRPL22	mitochondrial ribosomal protein L22	0.753748	6.64317	6.06168	0.0202232	1
347744	ENSG00000137434	C6orf52	chromosome 6 open reading frame 52	-4.07624	1.25114	6.18442	0.0202232	1
147111	ENSG00000185269	NOTUM	notum, palmitoleoyl-protein carboxylesterase	-1.63201	5.35263	6.06044	0.0202348	1
220032	ENSG00000178795	GDPD4	glycerophosphodiester phosphodiesterase domain containing 4	2.44598	0.624047	6.62063	0.0202892	1
440400	ENSG00000219200	RNASEK	ribonuclease K	2.44598	0.624047	6.62063	0.0202892	1
7197	NA	TRG-TCC1-1	tRNA-Gly (anticodon TCC) 1-1	2.44598	0.624047	6.62063	0.0202892	1
100505736	NA	LOC100505736	uncharacterized LOC100505736	2.44598	0.624047	6.62063	0.0202892	1
343637	ENSG00000101282	RSPO4	R-spondin 4	2.44598	0.624047	6.62063	0.0202892	1
4744	ENSG00000100285	NEFH	neurofilament heavy chain	2.44598	0.624047	6.62063	0.0202892	1
101928306	NA	LOC101928306	uncharacterized LOC101928306	2.44598	0.624047	6.62063	0.0202892	1
91975	ENSG00000145908	ZNF300	zinc finger protein 300	2.44598	0.624047	6.62063	0.0202892	1
101927003	ENSG00000254266	PKIA-AS1	PKIA antisense RNA 1	2.44598	0.624047	6.62063	0.0202892	1
7293	ENSG00000186827	TNFRSF4	TNF receptor superfamily member 4	2.46738	0.625802	6.58827	0.0202892	1
284551	NA	LINC01226	long intergenic non-protein coding RNA 1226	2.46738	0.625802	6.58827	0.0202892	1
4588	ENSG00000184956	MUC6	mucin 6, oligomeric mucus/gel-forming	2.46738	0.625802	6.58827	0.0202892	1
102724175	NA	NA	NA	2.46738	0.625802	6.58827	0.0202892	1
105371937	NA	NA	NA	2.46738	0.625802	6.58827	0.0202892	1
100189371	NA	TRR-TCG3-1	tRNA-Arg (anticodon TCG) 3-1	2.46738	0.625802	6.58827	0.0202892	1
3543	ENSG00000128322	IGLL1	immunoglobulin lambda like polypeptide 1	2.46738	0.625802	6.58827	0.0202892	1
91353	NA	IGLL3P	immunoglobulin lambda like polypeptide 3, pseudogene	2.46738	0.625802	6.58827	0.0202892	1
100189345	NA	TRX-CAT1-5	tRNA-iMet (anticodon CAT) 1-5	2.46738	0.625802	6.58827	0.0202892	1
285962	ENSG00000228775	WEE2-AS1	WEE2 antisense RNA 1	2.46738	0.625802	6.58827	0.0202892	1
389610	ENSG00000275591	XKR5	XK related 5	2.46738	0.625802	6.58827	0.0202892	1
102723750	NA	LOC102723750	uncharacterized LOC102723750	2.50554	0.628853	6.51306	0.0202892	1
440299	NA	DNM1P41	dynamin 1 pseudogene 41	2.50554	0.628853	6.51306	0.0202892	1
100128788	ENSG00000205913	SRRM2-AS1	SRRM2 antisense RNA 1	2.50554	0.628853	6.51306	0.0202892	1
115584	ENSG00000158865	SLC5A11	solute carrier family 5 member 11	2.50554	0.628853	6.51306	0.0202892	1
80755	ENSG00000266967	AARSD1	alanyl-tRNA synthetase domain containing 1	2.50554	0.628853	6.51306	0.0202892	1
4222	ENSG00000005102	MEOX1	mesenchyme homeobox 1	2.50554	0.628853	6.51306	0.0202892	1
79173	ENSG00000132016	BRME1	break repair meiotic recombinase recruitment factor 1	2.50554	0.628853	6.51306	0.0202892	1
402573	ENSG00000185955	SPACDR	sperm acrosome developmental regulator	2.50554	0.628853	6.51306	0.0202892	1
100313769	NA	MIR320B2	microRNA 320b-2	2.54151	0.631981	6.54601	0.0202892	1
403244	ENSG00000177151	OR2T35	olfactory receptor family 2 subfamily T member 35	2.54151	0.631981	6.54601	0.0202892	1
105376671	ENSG00000254862	LGR4-AS1	LGR4 antisense RNA 1	2.54151	0.631981	6.54601	0.0202892	1
79849	ENSG00000172367	NHERF4	NHERF family PDZ scaffold protein 4	2.54151	0.631981	6.54601	0.0202892	1
100033423	ENSG00000206609	SNORD116-11	small nucleolar RNA, C/D box 116-11	2.54151	0.631981	6.54601	0.0202892	1
81543	ENSG00000160233	LRRC3	leucine rich repeat containing 3	2.54151	0.631981	6.54601	0.0202892	1
101929095	ENSG00000249252	C1QTNF7-AS1	C1QTNF7 antisense RNA 1	2.54151	0.631981	6.54601	0.0202892	1
9228	ENSG00000198010	DLGAP2	DLG associated protein 2	2.54151	0.631981	6.54601	0.0202892	1
163255	ENSG00000171817	ZNF540	zinc finger protein 540	2.52104	0.630061	6.47516	0.0202892	1
100271873	ENSG00000268257	AIRN	antisense of IGF2R non-protein coding RNA	2.58046	0.635041	6.48144	0.0202892	1
100128494	ENSG00000251143	LOC100128494	uncharacterized LOC100128494	2.60266	0.636804	6.46008	0.0202892	1
124222	ENSG00000162073	PAQR4	progestin and adipoQ receptor family member 4	2.60266	0.636804	6.46008	0.0202892	1
7012	ENSG00000277925	TERC	telomerase RNA component	2.60266	0.636804	6.46008	0.0202892	1
340198	ENSG00000235821	IFITM4P	interferon induced transmembrane protein 4 pseudogene	2.60266	0.636804	6.46008	0.0202892	1
100170228	NA	SNAR-G2	small NF90 (ILF3) associated RNA G2	2.59632	0.636253	6.44802	0.0202892	1
54718	ENSG00000291104	BTN2A3P	butyrophilin subfamily 2 member A3, pseudogene	2.59632	0.636253	6.44802	0.0202892	1
101927245	ENSG00000283959	LOC101927245	uncharacterized LOC101927245	2.59632	0.636253	6.44802	0.0202892	1
105374700	NA	NA	NA	2.61865	0.638017	6.42811	0.0202892	1
401398	ENSG00000224897	POT1-AS1	POT1 antisense RNA 1	2.61865	0.638017	6.42811	0.0202892	1
1804	ENSG00000130226	DPP6	dipeptidyl peptidase like 6	2.61865	0.638017	6.42811	0.0202892	1
10893	ENSG00000125966	MMP24	matrix metallopeptidase 24	2.65872	0.641088	6.3762	0.0202892	1
101927700	ENSG00000234948	LINC01524	long intergenic non-protein coding RNA 1524	2.65872	0.641088	6.3762	0.0202892	1
574040	ENSG00000206760	SNORA6	small nucleolar RNA, H/ACA box 6	2.65872	0.641088	6.3762	0.0202892	1
23600	ENSG00000242110	AMACR	alpha-methylacyl-CoA racemase	2.65872	0.641088	6.3762	0.0202892	1
55293	ENSG00000151116	UEVLD	UEV and lactate/malate dehyrogenase domains	1.15411	4.00265	6.0514	0.0203197	1
64798	ENSG00000155792	DEPTOR	DEP domain containing MTOR interacting protein	-3.1656	0.944647	6.16273	0.0204203	1
23129	ENSG00000004399	PLXND1	plexin D1	-1.09578	4.3286	6.04003	0.020427	1
10350	ENSG00000154258	ABCA9	ATP binding cassette subfamily A member 9	2.43168	0.778932	6.03231	0.0205004	1
7803	ENSG00000112245	PTP4A1	protein tyrosine phosphatase 4A1	-0.637049	6.00096	6.03105	0.0205123	1
5743	ENSG00000073756	PTGS2	prostaglandin-endoperoxide synthase 2	-1.44586	5.03994	6.0302	0.0205204	1
389792	ENSG00000188483	IER5L	immediate early response 5 like	-1.45661	4.37744	6.03012	0.0205212	1
254531	ENSG00000176454	LPCAT4	lysophosphatidylcholine acyltransferase 4	-3.17887	0.947974	6.14877	0.0205483	1
10063	ENSG00000138495	COX17	cytochrome c oxidase copper chaperone COX17	-0.743266	5.23555	6.01611	0.020655	1
3601	ENSG00000134470	IL15RA	interleukin 15 receptor subunit alpha	1.43949	2.23849	6.01041	0.0207097	1
129831	ENSG00000155636	RBM45	RNA binding motif protein 45	-3.99061	1.23174	6.12212	0.020795	1
101927189	ENSG00000146147	LOC101927189	uncharacterized LOC101927189	2.41199	0.771377	5.99943	0.0208156	1
6728	ENSG00000153037	SRP19	signal recognition particle 19	0.599391	6.164	5.99727	0.0208365	1
10540	ENSG00000175203	DCTN2	dynactin subunit 2	-0.814337	4.6173	5.99019	0.0209051	1
100996724	NA	PDE4DIPP2	PDE4DIP pseudogene 2	0.61507	6.09476	5.98732	0.020933	1
101926911	ENSG00000214432	VPS33B-DT	VPS33B divergent transcript	0.76207	5.31061	5.98401	0.0209652	1
57486	ENSG00000123213	NLN	neurolysin	1.80336	2.1503	5.98345	0.0209707	1
4317	ENSG00000118113	MMP8	matrix metallopeptidase 8	2.38008	0.76836	5.98176	0.0209872	1
7134	ENSG00000114854	TNNC1	troponin C1, slow skeletal and cardiac type	1.43621	2.35242	5.97439	0.0210592	1
3044	NA	HBBP1	hemoglobin subunit beta pseudogene 1	2.1451	1.42361	5.96363	0.0211648	1
915	ENSG00000167286	CD3D	CD3 delta subunit of T-cell receptor complex	-3.94652	1.21815	6.07785	0.0212121	1
2512	ENSG00000087086	FTL	ferritin light chain	0.780459	10.2688	5.95788	0.0212216	1
403	ENSG00000138175	ARL3	ADP ribosylation factor like GTPase 3	0.806321	4.52242	5.95712	0.0212291	1
26828	ENSG00000199377	RNU5F-1	RNA, U5F small nuclear 1	2.28937	1.01112	5.94859	0.0213135	1
55885	ENSG00000048540	LMO3	LIM domain only 3	-3.86734	1.1786	6.05961	0.0213867	1
26133	ENSG00000100991	TRPC4AP	transient receptor potential cation channel subfamily C member 4 associated protein	-1.80789	2.79849	5.93993	0.0213997	1
5891	ENSG00000080823	MOK	MOK protein kinase	2.26636	1.60974	5.93182	0.0214806	1
4331	ENSG00000020426	MNAT1	MNAT1 component of CDK activating kinase	0.724829	5.76919	5.92868	0.021512	1
4613	ENSG00000134323	MYCN	MYCN proto-oncogene, bHLH transcription factor	-0.809681	4.59719	5.91932	0.0216061	1
83538	ENSG00000204815	ODAD4	outer dynein arm docking complex subunit 4	1.71807	2.06558	5.91863	0.021613	1
29855	ENSG00000118900	UBN1	ubinuclein 1	1.23643	3.70856	5.91844	0.0216149	1
387837	ENSG00000256660	CLEC12B	C-type lectin domain family 12 member B	2.44594	0.782398	5.91723	0.0216272	1
839	ENSG00000138794	CASP6	caspase 6	1.22744	3.09774	5.90396	0.0217614	1
26999	ENSG00000055163	CYFIP2	cytoplasmic FMR1 interacting protein 2	-0.925555	3.76054	5.89933	0.0218085	1
3161	ENSG00000072571	HMMR	hyaluronan mediated motility receptor	-1.26721	3.94347	5.89867	0.0218152	1
2317	ENSG00000136068	FLNB	filamin B	-0.802956	6.57581	5.89806	0.0218215	1
441518	ENSG00000212747	RTL8B	retrotransposon Gag like 8B	-1.56459	2.58813	5.89007	0.021903	1
9166	ENSG00000147654	EBAG9	estrogen receptor binding site associated antigen 9	-0.829368	4.26713	5.87456	0.0220622	1
114905	ENSG00000163145	C1QTNF7	C1q and TNF related 7	1.84268	1.69231	5.87202	0.0220884	1
64067	ENSG00000151322	NPAS3	neuronal PAS domain protein 3	-2.59997	1.38584	5.87078	0.0221012	1
2585	ENSG00000156958	GALK2	galactokinase 2	1.07717	4.05509	5.85422	0.0222729	1
113	ENSG00000121281	ADCY7	adenylate cyclase 7	-0.840893	4.56448	5.84987	0.0223182	1
8825	ENSG00000111052	LIN7A	lin-7 homolog A, crumbs cell polarity complex component	-1.27068	3.53321	5.84743	0.0223437	1
5719	ENSG00000185627	PSMD13	proteasome 26S subunit, non-ATPase 13	0.750206	6.48363	5.83154	0.0225104	1
93109	ENSG00000145014	TMEM44	transmembrane protein 44	-2.43372	1.30587	5.82922	0.0225349	1
8570	ENSG00000088247	KHSRP	KH-type splicing regulatory protein	-0.686414	5.23526	5.82799	0.0225479	1
222698	ENSG00000189134	NKAPL	NFKB activating protein like	1.87503	1.69481	5.82778	0.0225501	1
84873	ENSG00000144820	ADGRG7	adhesion G protein-coupled receptor G7	-5.56295	2.10252	5.94133	0.022558	1
51155	ENSG00000189159	JPT1	Jupiter microtubule associated homolog 1	-1.59332	4.46619	5.81533	0.0226819	1
7239	NA	TRV-AAC1-4	tRNA-Val (anticodon AAC) 1-4	2.03561	1.50627	5.80875	0.0227519	1
10533	ENSG00000197548	ATG7	autophagy related 7	1.03906	4.30427	5.80846	0.0227551	1
100131691	ENSG00000267858	MZF1-AS1	MZF1 antisense RNA 1	-3.2483	0.962282	5.91946	0.0227823	1
100170225	NA	SNAR-C1	small NF90 (ILF3) associated RNA C1	0.894004	7.38244	5.80149	0.0228295	1
55540	ENSG00000056736	IL17RB	interleukin 17 receptor B	-3.54944	1.05189	5.90175	0.0229657	1
838	ENSG00000137757	CASP5	caspase 5	1.37947	2.40323	5.78796	0.0229748	1
10612	ENSG00000110171	TRIM3	tripartite motif containing 3	2.36597	0.902151	5.78524	0.0230041	1
166793	ENSG00000168826	ZBTB49	zinc finger and BTB domain containing 49	-2.57947	1.46037	5.77873	0.0230744	1
158511	ENSG00000198930	CSAG1	chondrosarcoma associated gene 1	2.76562	0.811601	5.77503	0.0231146	1
2994	ENSG00000250361	GYPB	glycophorin B (MNS blood group)	1.35719	3.65935	5.77456	0.0231196	1
54884	ENSG00000042445	RETSAT	retinol saturase	-1.21187	2.74484	5.76992	0.02317	1
3276	ENSG00000126457	PRMT1	protein arginine methyltransferase 1	-0.740277	5.84035	5.76413	0.0232332	1
10769	ENSG00000145632	PLK2	polo like kinase 2	-0.725352	4.41657	5.76234	0.0232527	1
3281	ENSG00000230989	HSBP1	heat shock factor binding protein 1	0.601912	7.49933	5.75664	0.023315	1
2597	ENSG00000111640	GAPDH	glyceraldehyde-3-phosphate dehydrogenase	0.642752	9.12508	5.74795	0.0234103	1
528	ENSG00000155097	ATP6V1C1	ATPase H+ transporting V1 subunit C1	0.764645	6.0957	5.74227	0.0234729	1
3934	ENSG00000148346	LCN2	lipocalin 2	-3.92561	1.19561	5.85136	0.0234967	1
55362	ENSG00000137216	TMEM63B	transmembrane protein 63B	-1.43116	2.7206	5.73743	0.0235264	1
1645	ENSG00000187134	AKR1C1	aldo-keto reductase family 1 member C1	2.41143	1.19807	5.73672	0.0235343	1
653691	NA	TCAF2P1	TRPM8 channel associated factor 2 pseudogene 1	-1.82616	2.07435	5.73234	0.0235828	1
100996713	NA	NA	NA	-3.52323	1.06533	5.8409	0.0236086	1
3240	ENSG00000257017	HP	haptoglobin	-3.79746	1.15774	5.84086	0.023609	1
79148	ENSG00000271447	MMP28	matrix metallopeptidase 28	-3.51826	1.04613	5.84085	0.0236092	1
119559	ENSG00000183605	SFXN4	sideroflexin 4	0.922799	4.52229	5.72704	0.0236416	1
29988	ENSG00000136856	SLC2A8	solute carrier family 2 member 8	-1.00991	3.90421	5.7261	0.0236521	1
55301	ENSG00000152463	OLAH	oleoyl-ACP hydrolase	0.96632	6.92629	5.71673	0.0237565	1
23169	ENSG00000116704	SLC35D1	solute carrier family 35 member D1	-1.13684	3.21587	5.71654	0.0237587	1
23463	ENSG00000116237	ICMT	isoprenylcysteine carboxyl methyltransferase	-0.784126	4.5793	5.71371	0.0237904	1
80150	ENSG00000162174	ASRGL1	asparaginase and isoaspartyl peptidase 1	-3.25505	0.965481	5.8147	0.0238916	1
100873974	NA	KCNC4-DT	KCNC4 divergent transcript	2.37318	0.617886	5.9276	0.0238925	1
100505666	NA	DCST1-AS1	DCST1 antisense RNA 1	2.37318	0.617886	5.9276	0.0238925	1
127943	ENSG00000162746	FCRLB	Fc receptor like B	2.37318	0.617886	5.9276	0.0238925	1
284525	ENSG00000162753	SLC9C2	solute carrier family 9 member C2 (putative)	2.37318	0.617886	5.9276	0.0238925	1
101929541	ENSG00000226251	LINC02608	long intergenic non-protein coding RNA 2608	2.37318	0.617886	5.9276	0.0238925	1
100289410	NA	MCF2L-AS1	MCF2L antisense RNA 1	2.37318	0.617886	5.9276	0.0238925	1
83886	ENSG00000172382	PRSS27	serine protease 27	2.37318	0.617886	5.9276	0.0238925	1
284009	NA	LOC284009	uncharacterized LOC284009	2.37318	0.617886	5.9276	0.0238925	1
101927571	ENSG00000266850	LOC101927571	uncharacterized LOC101927571	2.37318	0.617886	5.9276	0.0238925	1
100505555	ENSG00000196605	LOC100505555	uncharacterized LOC100505555	2.37318	0.617886	5.9276	0.0238925	1
389015	ENSG00000180251	SLC9A4	solute carrier family 9 member A4	2.37318	0.617886	5.9276	0.0238925	1
285095	ENSG00000216921	FAM240C	family with sequence similarity 240 member C	2.37318	0.617886	5.9276	0.0238925	1
100113393	ENSG00000222365	SNORD12B	small nucleolar RNA, C/D box 12B	2.37318	0.617886	5.9276	0.0238925	1
100133669	NA	LY6E-DT	LY6E divergent transcript	2.37318	0.617886	5.9276	0.0238925	1
6881	ENSG00000166337	TAF10	TATA-box binding protein associated factor 10	-3.10541	0.93047	5.81419	0.0238971	1
83547	ENSG00000167705	RILP	Rab interacting lysosomal protein	-2.1654	1.54935	5.70336	0.0239065	1
10857	ENSG00000101856	PGRMC1	progesterone receptor membrane component 1	-0.793432	4.43047	5.69385	0.0240139	1
8669	ENSG00000104131	EIF3J	eukaryotic translation initiation factor 3 subunit J	-0.889247	5.01951	5.69206	0.0240342	1
100288152	NA	SLC9A3-AS1	SLC9A3 antisense RNA 1	2.12947	1.24058	5.68707	0.0240907	1
1284	ENSG00000134871	COL4A2	collagen type IV alpha 2 chain	-0.667101	7.1487	5.67568	0.0242204	1
442720	ENSG00000237064	EIF3IP1	eukaryotic translation initiation factor 3 subunit I pseudogene 1	0.884459	3.92945	5.65851	0.0244174	1
102724450	ENSG00000226944	RNF207-AS1	RNF207 antisense RNA 1	2.51974	0.630222	5.87696	0.0244312	1
10218	ENSG00000171819	ANGPTL7	angiopoietin like 7	2.51974	0.630222	5.87696	0.0244312	1
399746	NA	ACTR3BP5	ACTR3B pseudogene 5	2.51974	0.630222	5.87696	0.0244312	1
653075	ENSG00000261247	GOLGA8T	golgin A8 family member T	2.51974	0.630222	5.87696	0.0244312	1
102724385	NA	NA	NA	2.51974	0.630222	5.87696	0.0244312	1
114038	ENSG00000185186	LINC00313	long intergenic non-protein coding RNA 313	2.51974	0.630222	5.87696	0.0244312	1
101928978	ENSG00000250546	LINC02994	long intergenic non-protein coding RNA 2994	2.51974	0.630222	5.87696	0.0244312	1
442319	ENSG00000214652	ZNF727	zinc finger protein 727	2.51974	0.630222	5.87696	0.0244312	1
286083	ENSG00000275427	LOC286083	uncharacterized LOC286083	2.51974	0.630222	5.87696	0.0244312	1
101927502	ENSG00000233926	TLE1-DT	TLE1 divergent transcript	2.51974	0.630222	5.87696	0.0244312	1
728695	ENSG00000227234	SPANXB1	SPANX family member B1	2.51974	0.630222	5.87696	0.0244312	1
55384	ENSG00000214548	MEG3	maternally expressed 3	1.60112	3.368	5.65679	0.0244372	1
5595	ENSG00000102882	MAPK3	mitogen-activated protein kinase 3	-1.26496	2.78076	5.65526	0.0244548	1
51421	ENSG00000114019	AMOTL2	angiomotin like 2	-1.02614	4.6987	5.65403	0.024469	1
6168	ENSG00000197756	RPL37A	ribosomal protein L37a	0.729373	8.69399	5.63672	0.0246699	1
10001	ENSG00000133997	MED6	mediator complex subunit 6	0.714958	4.87935	5.63274	0.0247162	1
127833	ENSG00000143858	SYT2	synaptotagmin 2	2.28393	0.876655	5.63266	0.0247172	1
23093	ENSG00000119685	TTLL5	tubulin tyrosine ligase like 5	1.20134	3.0874	5.63152	0.0247305	1
127731	ENSG00000158816	VWA5B1	von Willebrand factor A domain containing 5B1	2.56343	0.633741	5.8464	0.0247628	1
199920	ENSG00000187889	FYB2	FYN binding protein 2	2.56343	0.633741	5.8464	0.0247628	1
9900	ENSG00000159164	SV2A	synaptic vesicle glycoprotein 2A	2.56343	0.633741	5.8464	0.0247628	1
100128191	ENSG00000257167	TMPO-AS1	TMPO antisense RNA 1	2.56343	0.633741	5.8464	0.0247628	1
22895	ENSG00000089169	RPH3A	rabphilin 3A	2.56343	0.633741	5.8464	0.0247628	1
730013	ENSG00000290943	ABCC6P2	ATP binding cassette subfamily C member 6 pseudogene 2	2.56343	0.633741	5.8464	0.0247628	1
105372315	NA	ERVS71-1	endogenous retrovirus group S71 member 1, envelope	2.56343	0.633741	5.8464	0.0247628	1
401014	ENSG00000226674	TEX41	testis expressed 41	2.56343	0.633741	5.8464	0.0247628	1
7429	ENSG00000127831	VIL1	villin 1	2.56343	0.633741	5.8464	0.0247628	1
50939	ENSG00000081148	IMPG2	interphotoreceptor matrix proteoglycan 2	2.56343	0.633741	5.8464	0.0247628	1
348840	ENSG00000291192	ANKRD18DP	ankyrin repeat domain 18D, pseudogene	2.56343	0.633741	5.8464	0.0247628	1
102546294	ENSG00000247199	FBXO38-DT	FBXO38 divergent transcript	2.56343	0.633741	5.8464	0.0247628	1
105369145	NA	NA	NA	2.56343	0.633741	5.8464	0.0247628	1
100505635	ENSG00000235033	DAAM2-AS1	DAAM2 antisense RNA 1	2.56343	0.633741	5.8464	0.0247628	1
266977	ENSG00000153292	ADGRF1	adhesion G protein-coupled receptor F1	2.56343	0.633741	5.8464	0.0247628	1
494551	ENSG00000214102	WEE2	WEE2 oocyte meiosis inhibiting kinase	2.56343	0.633741	5.8464	0.0247628	1
644249	NA	LOC644249	ankyrin repeat domain 18A pseudogene	2.56343	0.633741	5.8464	0.0247628	1
136306	ENSG00000157703	SVOPL	SVOP like	-3.90914	1.20499	5.73528	0.0247725	1
10600	ENSG00000156256	USP16	ubiquitin specific peptidase 16	0.588794	7.33625	5.62668	0.0247871	1
51227	ENSG00000185808	PIGP	phosphatidylinositol glycan anchor biosynthesis class P	0.786217	4.74013	5.62615	0.0247933	1
100271832	ENSG00000236854	LOC100271832	uncharacterized LOC100271832	-3.23058	0.967833	5.7256	0.0248823	1
79848	ENSG00000104218	CSPP1	centrosome and spindle pole associated protein 1	0.786654	6.73083	5.61632	0.0249088	1
91614	ENSG00000121690	DEPDC7	DEP domain containing 7	2.5854	0.793443	5.61545	0.024919	1
8916	ENSG00000138641	HERC3	HECT and RLD domain containing E3 ubiquitin protein ligase 3	1.42639	2.48604	5.61254	0.0249534	1
677806	ENSG00000207392	SNORA20	small nucleolar RNA, H/ACA box 20	2.09621	0.961302	5.61092	0.0249725	1
100462977	NA	MTRNR2L1	MT-RNR2 like 1 (pseudogene)	0.677729	6.7498	5.60958	0.0249883	1
5920	ENSG00000133321	PLAAT4	phospholipase A and acyltransferase 4	0.914866	4.55485	5.60773	0.0250102	1
9326	ENSG00000273611	ZNHIT3	zinc finger HIT-type containing 3	0.718236	5.1783	5.60641	0.0250258	1
54517	ENSG00000091127	PUS7	pseudouridine synthase 7	1.40371	2.45495	5.60631	0.025027	1
100132163	NA	PHKA2-AS1	PHKA2 antisense RNA 1	2.21889	0.869017	5.60573	0.0250339	1
115024	ENSG00000141698	NT5C3B	5'-nucleotidase, cytosolic IIIB	-1.54623	2.35858	5.60429	0.0250509	1
10159	ENSG00000182220	ATP6AP2	ATPase H+ transporting accessory protein 2	-0.693116	5.68429	5.5988	0.025116	1
196446	ENSG00000166268	MYRFL	myelin regulatory factor like	2.43651	1.13642	5.59215	0.0251952	1
6877	ENSG00000148835	TAF5	TATA-box binding protein associated factor 5	-2.02966	1.88062	5.59096	0.0252094	1
100133985	ENSG00000231327	LINC01816	long intergenic non-protein coding RNA 1816	2.31727	0.772819	5.59007	0.0252201	1
7474	ENSG00000114251	WNT5A	Wnt family member 5A	-0.852621	4.43443	5.58517	0.0252786	1
57038	ENSG00000146282	RARS2	arginyl-tRNA synthetase 2, mitochondrial	0.986616	4.95993	5.5775	0.0253706	1
134510	ENSG00000164332	UBLCP1	ubiquitin like domain containing CTD phosphatase 1	0.685318	5.274	5.57634	0.0253846	1
946	ENSG00000105492	SIGLEC6	sialic acid binding Ig like lectin 6	0.81456	5.09207	5.57549	0.0253948	1
64983	ENSG00000106591	MRPL32	mitochondrial ribosomal protein L32	0.659931	4.95386	5.57269	0.0254285	1
27235	ENSG00000173085	COQ2	coenzyme Q2, polyprenyltransferase	-1.03833	3.24336	5.56759	0.02549	1
80003	ENSG00000135749	PCNX2	pecanex 2	2.57774	0.794474	5.56275	0.0255486	1
339260	ENSG00000233098	LOC339260	uncharacterized LOC339260	2.64247	0.639873	5.77054	0.0256081	1
148229	ENSG00000130270	ATP8B3	ATPase phospholipid transporting 8B3	2.64247	0.639873	5.77054	0.0256081	1
101927865	NA	MYOSLID-AS1	MYOSLID antisense RNA 1	2.64247	0.639873	5.77054	0.0256081	1
100874032	ENSG00000230082	PRRT3-AS1	PRRT3 antisense RNA 1	2.64247	0.639873	5.77054	0.0256081	1
101926903	ENSG00000240922	LSAMP-AS1	LSAMP antisense RNA 1	2.64247	0.639873	5.77054	0.0256081	1
100507266	ENSG00000247708	STX18-AS1	STX18 antisense RNA 1 (head to head)	2.64247	0.639873	5.77054	0.0256081	1
102467073	NA	PDCD6-DT	PDCD6 divergent transcript	2.64247	0.639873	5.77054	0.0256081	1
340204	ENSG00000204140	CLPSL1	colipase like 1	2.64247	0.639873	5.77054	0.0256081	1
104326051	ENSG00000254338	MAFA-AS1	MAFA antisense RNA 1	2.64247	0.639873	5.77054	0.0256081	1
29991	ENSG00000122136	OBP2A	odorant binding protein 2A	2.64247	0.639873	5.77054	0.0256081	1
8852	ENSG00000147081	AKAP4	A-kinase anchoring protein 4	2.64247	0.639873	5.77054	0.0256081	1
57405	ENSG00000152253	SPC25	SPC25 component of NDC80 kinetochore complex	1.21371	3.65339	5.55603	0.0256301	1
5612	ENSG00000137492	THAP12	THAP domain containing 12	-0.809822	4.5171	5.54848	0.0257221	1
3223	ENSG00000197757	HOXC6	homeobox C6	-3.10217	0.922315	5.6524	0.0257305	1
54542	ENSG00000056586	RC3H2	ring finger and CCCH-type domains 2	-0.795187	3.89306	5.54349	0.025783	1
200315	ENSG00000128383	APOBEC3A	apolipoprotein B mRNA editing enzyme catalytic subunit 3A	2.50204	1.07363	5.53908	0.025837	1
100289650	ENSG00000225877	PSG8-AS1	PSG8 antisense RNA 1	1.9264	1.97981	5.53381	0.0259017	1
7125	ENSG00000101470	TNNC2	troponin C2, fast skeletal type	-3.62401	1.06878	5.6368	0.0259154	1
79675	ENSG00000138399	FASTKD1	FAST kinase domains 1	-1.1673	2.82603	5.53042	0.0259435	1
23508	ENSG00000133985	TTC9	tetratricopeptide repeat domain 9	-0.800466	3.98777	5.52999	0.0259487	1
101928118	ENSG00000226026	RWDD3-DT	RWDD3 divergent transcript	2.67508	0.642304	5.73074	0.0260645	1
105370971	NA	NA	NA	2.67508	0.642304	5.73074	0.0260645	1
54578	ENSG00000167165	UGT1A6	UDP glucuronosyltransferase family 1 member A6	2.67508	0.642304	5.73074	0.0260645	1
105372682	ENSG00000225657	LINC01716	long intergenic non-protein coding RNA 1716	2.67508	0.642304	5.73074	0.0260645	1
150165	ENSG00000172967	XKR3	XK related 3	2.67508	0.642304	5.73074	0.0260645	1
84666	ENSG00000163515	RETNLB	resistin like beta	2.67508	0.642304	5.73074	0.0260645	1
4111	ENSG00000213401	MAGEA12	MAGE family member A12	2.67508	0.642304	5.73074	0.0260645	1
152006	ENSG00000137075	RNF38	ring finger protein 38	-0.750568	4.56833	5.50856	0.0262142	1
101928605	NA	ARHGEF35-AS1	ARHGEF35 antisense RNA 1	-3.33242	0.992542	5.61096	0.0262249	1
100506898	NA	MAGOH2P	mago homolog 2, pseudogene	0.700677	4.68139	5.50591	0.0262472	1
6612	ENSG00000184900	SUMO3	small ubiquitin like modifier 3	-0.68687	5.53457	5.50384	0.0262731	1
7096	ENSG00000174125	TLR1	toll like receptor 1	1.35825	1.82872	5.50055	0.0263142	1
1965	ENSG00000134001	EIF2S1	eukaryotic translation initiation factor 2 subunit alpha	0.821848	6.01754	5.49862	0.0263384	1
23029	ENSG00000188739	RBM34	RNA binding motif protein 34	0.671695	5.67875	5.4926	0.0264139	1
83540	ENSG00000143228	NUF2	NUF2 component of NDC80 kinetochore complex	-1.65736	2.71791	5.49098	0.0264342	1
51338	ENSG00000110079	MS4A4A	membrane spanning 4-domains A4A	0.839542	7.44612	5.49083	0.0264362	1
345	ENSG00000110245	APOC3	apolipoprotein C3	-5.70599	2.01664	5.59087	0.0264684	1
132001	ENSG00000144559	TAMM41	TAM41 mitochondrial translocator assembly and maintenance homolog	-1.49512	2.68978	5.48308	0.0265338	1
64792	ENSG00000128581	IFT22	intraflagellar transport 22	-1.84188	2.61187	5.47436	0.0266442	1
645958	NA	RPS18P9	ribosomal protein S18 pseudogene 9	0.70632	6.12377	5.46551	0.0267566	1
8572	ENSG00000131435	PDLIM4	PDZ and LIM domain 4	-1.72121	2.76492	5.46201	0.0268013	1
22883	ENSG00000171603	CLSTN1	calsyntenin 1	-1.05446	3.41323	5.45465	0.0268954	1
90007	ENSG00000167470	MIDN	midnolin	-0.660582	6.016	5.45018	0.0269528	1
440275	ENSG00000128829	EIF2AK4	eukaryotic translation initiation factor 2 alpha kinase 4	-0.864489	4.35813	5.44287	0.0270469	1
4330	ENSG00000169184	MN1	MN1 proto-oncogene, transcriptional regulator	-3.39281	1.00567	5.54105	0.0270831	1
9588	ENSG00000117592	PRDX6	peroxiredoxin 6	0.765169	8.14964	5.4372	0.0271201	1
8341	ENSG00000233822	H2BC15	H2B clustered histone 15	-3.12787	0.926974	5.53398	0.0271716	1
51231	ENSG00000105053	VRK3	VRK serine/threonine kinase 3	0.85811	4.76954	5.43187	0.0271891	1
352887	ENSG00000291034	GYG2P1	glycogenin 2 pseudogene 1	-3.92325	1.21792	5.53019	0.0272192	1
1509	ENSG00000117984	CTSD	cathepsin D	-0.688572	5.70542	5.42818	0.0272371	1
1066	ENSG00000198848	CES1	carboxylesterase 1	-1.97845	1.75842	5.42432	0.0272872	1
193629	ENSG00000215533	LINC00189	long intergenic non-protein coding RNA 189	-3.59407	1.0848	5.52366	0.0273014	1
10869	ENSG00000172046	USP19	ubiquitin specific peptidase 19	-0.898312	3.54295	5.41479	0.0274116	1
51300	ENSG00000113845	TIMMDC1	translocase of inner mitochondrial membrane domain containing 1	0.668443	6.51054	5.41207	0.0274473	1
5881	ENSG00000169750	RAC3	Rac family small GTPase 3	-2.39597	1.30513	5.40816	0.0274986	1
2113	ENSG00000134954	ETS1	ETS proto-oncogene 1, transcription factor	-1.19717	2.74716	5.4039	0.0275546	1
3872	ENSG00000128422	KRT17	keratin 17	-3.73627	1.13038	5.49729	0.0276361	1
22985	ENSG00000100813	ACIN1	apoptotic chromatin condensation inducer 1	0.639311	6.55816	5.39729	0.0276418	1
2272	ENSG00000189283	FHIT	fragile histidine triad diadenosine triphosphatase	-2.59375	2.19155	5.39346	0.0276924	1
1508	ENSG00000164733	CTSB	cathepsin B	-0.735226	7.98711	5.38982	0.0277406	1
196410	ENSG00000170439	TMT1B	thiol methyltransferase 1B	1.76254	1.55944	5.38938	0.0277465	1
9814	ENSG00000198089	SFI1	SFI1 centrin binding protein	2.25344	0.880516	5.38052	0.0278642	1
4635	ENSG00000198336	MYL4	myosin light chain 4	1.47248	3.7246	5.38011	0.0278697	1
55143	ENSG00000134690	CDCA8	cell division cycle associated 8	-2.03325	2.37943	5.37502	0.0279377	1
5357	ENSG00000120756	PLS1	plastin 1	-3.72625	1.1177	5.46058	0.0281098	1
153579	ENSG00000165810	BTNL9	butyrophilin like 9	-3.89389	1.18562	5.4573	0.0281526	1
5797	ENSG00000173482	PTPRM	protein tyrosine phosphatase receptor type M	-0.940351	3.54086	5.35516	0.0282045	1
105371026	NA	LOC105371026	uncharacterized LOC105371026	-3.18304	0.938894	5.45097	0.0282352	1
2941	ENSG00000170899	GSTA4	glutathione S-transferase alpha 4	0.642032	6.38374	5.34883	0.0282901	1
26263	ENSG00000167196	FBXO22	F-box protein 22	-1.10154	3.6823	5.33885	0.0284257	1
7241	NA	TRV-AAC1-3	tRNA-Val (anticodon AAC) 1-3	2.05095	1.50917	5.3386	0.028429	1
791230	NA	TRV-AAC1-5	tRNA-Val (anticodon AAC) 1-5	2.05095	1.50917	5.3386	0.028429	1
54522	ENSG00000134461	ANKRD16	ankyrin repeat domain 16	-3.32904	0.992021	5.4326	0.0284768	1
10654	ENSG00000163344	PMVK	phosphomevalonate kinase	-0.947488	4.3591	5.3328	0.0285082	1
152831	ENSG00000134962	KLB	klotho beta	-3.18954	0.939942	5.42872	0.0285282	1
29950	ENSG00000197019	SERTAD1	SERTA domain containing 1	-0.936317	3.9862	5.32328	0.0286387	1
54433	ENSG00000109534	GAR1	GAR1 ribonucleoprotein	-1.00742	3.65464	5.32074	0.0286736	1
64718	ENSG00000059145	UNKL	unk like zinc finger	-1.41228	2.75365	5.32004	0.0286832	1
124512	ENSG00000181038	METTL23	methyltransferase 23, arginine	-1.36771	2.88423	5.31886	0.0286994	1
90736	ENSG00000182518	VCF2	VCP nuclear cofactor family member 2	1.07261	2.88339	5.31661	0.0287304	1
594	ENSG00000083123	BCKDHB	branched chain keto acid dehydrogenase E1 subunit beta	-1.0559	3.57798	5.31549	0.0287459	1
4515	ENSG00000214827	MTCP1	mature T cell proliferation 1	-2.87734	0.866086	5.41186	0.0287524	1
9693	ENSG00000109756	RAPGEF2	Rap guanine nucleotide exchange factor 2	0.614639	5.56218	5.31153	0.0288005	1
55760	ENSG00000089876	DHX32	DEAH-box helicase 32 (putative)	0.883596	3.63337	5.31025	0.0288182	1
100188990	NA	TRV-AAC1-2	tRNA-Val (anticodon AAC) 1-2	2.05614	1.44668	5.30079	0.0289494	1
791231	NA	TRV-AAC3-1	tRNA-Val (anticodon AAC) 3-1	2.45588	0.898536	5.29827	0.0289844	1
4907	ENSG00000135318	NT5E	5'-nucleotidase ecto	-0.878237	5.89517	5.29586	0.0290181	1
8535	ENSG00000141582	CBX4	chromobox 4	-1.03841	3.42351	5.29447	0.0290373	1
201562	ENSG00000206527	HACD2	3-hydroxyacyl-CoA dehydratase 2	-3.24806	0.961765	5.38879	0.0290624	1
80114	ENSG00000122870	BICC1	BicC family RNA binding protein 1	1.1315	2.74826	5.28838	0.0291224	1
54097	ENSG00000183844	FAM3B	FAM3 metabolism regulating signaling molecule B	-1.0293	5.40103	5.28665	0.0291467	1
55421	ENSG00000074356	NCBP3	nuclear cap binding subunit 3	-0.673982	4.63967	5.28339	0.0291923	1
9787	ENSG00000126787	DLGAP5	DLG associated protein 5	-1.82785	2.68945	5.27899	0.0292541	1
401535	ENSG00000204446	LINC02872	long intergenic non-protein coding RNA 2872	2.33377	0.87856	5.27642	0.0292903	1
25798	ENSG00000164713	BRI3	brain protein I3	-0.595237	5.78569	5.2714	0.0293611	1
100505716	ENSG00000223522	LOC100505716	uncharacterized LOC100505716	2.10775	1.26588	5.26865	0.0293999	1
5204	ENSG00000123349	PFDN5	prefoldin subunit 5	0.671728	9.18413	5.26545	0.0294452	1
23641	ENSG00000182195	LDOC1	LDOC1 regulator of NFKB signaling	2.40922	1.1302	5.264	0.0294658	1
7433	ENSG00000114812	VIPR1	vasoactive intestinal peptide receptor 1	2.2828	0.867545	5.25955	0.0295289	1
10301	ENSG00000176124	DLEU1	deleted in lymphocytic leukemia 1	-2.32632	1.68661	5.2593	0.0295325	1
120892	ENSG00000188906	LRRK2	leucine rich repeat kinase 2	-3.5602	1.06747	5.35255	0.0295569	1
64788	ENSG00000103227	LMF1	lipase maturation factor 1	2.37349	0.944407	5.2573	0.0295609	1
729020	ENSG00000235376	RPEL1	ribulose-5-phosphate-3-epimerase like 1	1.24616	2.25976	5.25706	0.0295643	1
285598	ENSG00000175414	ARL10	ADP ribosylation factor like GTPase 10	2.32594	0.88359	5.25678	0.0295682	1
203238	ENSG00000164989	CCDC171	coiled-coil domain containing 171	1.02119	4.03005	5.25422	0.0296047	1
56952	ENSG00000099256	PRTFDC1	phosphoribosyl transferase domain containing 1	2.16936	0.982561	5.25049	0.029658	1
93010	ENSG00000156966	B3GNT7	UDP-GlcNAc:betaGal beta-1,3-N-acetylglucosaminyltransferase 7	-2.57184	1.41795	5.25036	0.0296598	1
4811	ENSG00000116962	NID1	nidogen 1	-1.23727	5.31788	5.24943	0.029673	1
10806	ENSG00000054282	SDCCAG8	SHH signaling and ciliogenesis regulator SDCCAG8	0.745205	4.69602	5.24793	0.0296945	1
284723	ENSG00000162461	SLC25A34	solute carrier family 25 member 34	-3.12367	0.934683	5.34202	0.0297023	1
5140	ENSG00000152270	PDE3B	phosphodiesterase 3B	-1.28991	3.12165	5.24503	0.029736	1
653	ENSG00000112175	BMP5	bone morphogenetic protein 5	0.856514	4.19136	5.24471	0.0297406	1
26866	ENSG00000206588	RNU1-28P	RNA, U1 small nuclear 28, pseudogene	1.16337	3.49481	5.24242	0.0297734	1
205860	ENSG00000179046	TRIML2	tripartite motif family like 2	1.19836	2.8586	5.24234	0.0297745	1
3897	ENSG00000198910	L1CAM	L1 cell adhesion molecule	2.30708	0.760646	5.2408	0.0297966	1
864	ENSG00000020633	RUNX3	RUNX family transcription factor 3	-3.23687	0.949675	5.33035	0.0298645	1
100129128	ENSG00000256980	KHDC1L	KH domain containing 1 like	2.54714	0.956999	5.23595	0.0298663	1
92126	ENSG00000171451	DSEL	dermatan sulfate epimerase like	-1.01308	3.73599	5.23528	0.0298759	1
5001	ENSG00000164815	ORC5	origin recognition complex subunit 5	-1.09827	3.48424	5.2324	0.0299174	1
23333	ENSG00000173852	DPY19L1	dpy-19 like C-mannosyltransferase 1	-0.647754	6.3104	5.23184	0.0299255	1
169026	ENSG00000164756	SLC30A8	solute carrier family 30 member 8	1.98779	1.69836	5.22877	0.0299697	1
5047	ENSG00000122133	PAEP	progestagen associated endometrial protein	-5.06673	1.7826	5.32198	0.0299814	1
100189161	NA	TRV-AAC4-1	tRNA-Val (anticodon AAC) 4-1	2.05024	1.04762	5.2251	0.0300228	1
26276	ENSG00000184056	VPS33B	VPS33B late endosome and lysosome associated	-1.48532	2.39343	5.21768	0.0301304	1
1088	ENSG00000124469	CEACAM8	CEA cell adhesion molecule 8	1.35656	6.97995	5.21453	0.0301761	1
3485	ENSG00000115457	IGFBP2	insulin like growth factor binding protein 2	-1.09381	3.57346	5.20947	0.03025	1
100996579	ENSG00000227403	LINC01806	long intergenic non-protein coding RNA 1806	-2.94351	0.880288	5.29791	0.0303204	1
57539	ENSG00000118965	WDR35	WD repeat domain 35	2.22892	1.26766	5.20124	0.0303702	1
266812	ENSG00000177432	NAP1L5	nucleosome assembly protein 1 like 5	-1.85933	1.90765	5.18815	0.0305627	1
57111	ENSG00000132698	RAB25	RAB25, member RAS oncogene family	0.780886	5.31744	5.18352	0.0306312	1
175	ENSG00000038002	AGA	aspartylglucosaminidase	1.00531	4.25926	5.17512	0.0307557	1
399687	ENSG00000196535	MYO18A	myosin XVIIIA	1.42903	2.29767	5.17016	0.0308295	1
692215	ENSG00000275662	SNORD112	small nucleolar RNA, C/D box 112	2.27861	1.00229	5.1668	0.0308796	1
57419	ENSG00000185052	SLC24A3	solute carrier family 24 member 3	-2.15232	1.64505	5.16012	0.0309796	1
285676	ENSG00000178187	ZNF454	zinc finger protein 454	2.46533	0.793678	5.15992	0.0309825	1
5034	ENSG00000185624	P4HB	prolyl 4-hydroxylase subunit beta	-0.686818	8.17095	5.15676	0.0310299	1
55048	ENSG00000167987	VPS37C	VPS37C subunit of ESCRT-I	-0.800382	4.973	5.15355	0.031078	1
128387	ENSG00000203705	TATDN3	TatD DNase domain containing 3	1.06285	3.22846	5.15303	0.031086	1
284349	ENSG00000167637	ZNF283	zinc finger protein 283	-2.71252	1.44457	5.15117	0.0311139	1
221710	ENSG00000224531	SMIM13	small integral membrane protein 13	-0.854786	3.60346	5.15095	0.0311172	1
105378949	ENSG00000231050	GNB1-DT	GNB1 divergent transcript	2.33515	0.793953	5.15055	0.0311232	1
11091	ENSG00000196363	WDR5	WD repeat domain 5	-0.934251	4.16449	5.14988	0.0311333	1
9374	ENSG00000221988	PPT2	palmitoyl-protein thioesterase 2	-1.31233	2.47333	5.14583	0.0311943	1
51524	ENSG00000149483	TMEM138	transmembrane protein 138	0.832483	4.96442	5.14369	0.0312267	1
5693	ENSG00000100804	PSMB5	proteasome 20S subunit beta 5	0.621435	7.12956	5.14143	0.0312609	1
83605	ENSG00000136280	CCM2	CCM2 scaffold protein	-1.69128	2.17487	5.13747	0.0313209	1
100616233	NA	NA	NA	2.3932	0.878111	5.12649	0.0314878	1
151011	ENSG00000186522	SEPTIN10	septin 10	-0.686161	5.11722	5.12309	0.0315397	1
57333	ENSG00000142552	RCN3	reticulocalbin 3	-3.65479	1.10162	5.21317	0.0315482	1
339290	ENSG00000263753	LINC00667	long intergenic non-protein coding RNA 667	-1.76155	1.83559	5.12247	0.0315492	1
3594	ENSG00000096996	IL12RB1	interleukin 12 receptor subunit beta 1	1.84853	1.2917	5.11936	0.0315968	1
6983	ENSG00000211695	TRGV9	T cell receptor gamma variable 9	2.4805	0.894699	5.1176	0.0316237	1
3835	ENSG00000079616	KIF22	kinesin family member 22	-0.967073	3.79372	5.11425	0.031675	1
1829	ENSG00000046604	DSG2	desmoglein 2	-0.599477	6.17589	5.11385	0.0316812	1
202459	ENSG00000243775	OSTCP1	oligosaccharyltransferase complex subunit pseudogene 1	0.728796	5.29607	5.11294	0.0316952	1
51256	ENSG00000145979	TBC1D7	TBC1 domain family member 7	-1.25873	3.61766	5.11213	0.0317076	1
59344	ENSG00000179148	ALOXE3	arachidonate lipoxygenase 3	2.00222	1.14357	5.1116	0.0317158	1
516	ENSG00000159199	ATP5MC1	ATP synthase membrane subunit c locus 1	0.647552	6.18712	5.10723	0.0317831	1
596	ENSG00000171791	BCL2	BCL2 apoptosis regulator	-0.659013	6.14089	5.10337	0.0318427	1
54814	ENSG00000011478	QPCTL	glutaminyl-peptide cyclotransferase like	-2.34872	1.33586	5.09926	0.0319061	1
57452	ENSG00000100626	GALNT16	polypeptide N-acetylgalactosaminyltransferase 16	-3.09681	0.919955	5.178	0.0320742	1
256764	ENSG00000166415	WDR72	WD repeat domain 72	-3.99222	1.21344	5.17191	0.0321661	1
55635	ENSG00000024526	DEPDC1	DEP domain containing 1	-1.81743	2.29835	5.0808	0.0321932	1
7001	ENSG00000167815	PRDX2	peroxiredoxin 2	0.660707	7.10762	5.07618	0.0322655	1
3885	ENSG00000131737	KRT34	keratin 34	2.02969	1.03879	5.07354	0.0323069	1
6284	ENSG00000189171	S100A13	S100 calcium binding protein A13	0.667941	6.80831	5.06894	0.0323792	1
27242	ENSG00000146072	TNFRSF21	TNF receptor superfamily member 21	-1.01873	3.34294	5.06585	0.0324278	1
5641	ENSG00000100600	LGMN	legumain	-0.655365	7.45442	5.06277	0.0324763	1
79960	ENSG00000077684	JADE1	jade family PHD finger 1	-1.24639	2.81285	5.05793	0.0325529	1
7257	ENSG00000116918	TSNAX	translin associated factor X	-0.805155	3.84454	5.05752	0.0325594	1
54839	ENSG00000137821	LRRC49	leucine rich repeat containing 49	2.66911	0.826823	5.0575	0.0325597	1
84669	ENSG00000170832	USP32	ubiquitin specific peptidase 32	0.891714	3.66309	5.0572	0.0325644	1
56674	ENSG00000175348	TMEM9B	TMEM9 domain family member B	-0.653125	6.33443	5.05141	0.0326562	1
91543	ENSG00000134321	RSAD2	radical S-adenosyl methionine domain containing 2	-2.15643	1.629	5.04652	0.032734	1
898	ENSG00000105173	CCNE1	cyclin E1	-0.872704	4.27504	5.0457	0.032747	1
27330	ENSG00000072133	RPS6KA6	ribosomal protein S6 kinase A6	-1.60291	3.11498	5.03966	0.0328433	1
55184	ENSG00000089091	DZANK1	double zinc ribbon and ankyrin repeat domains 1	2.27988	1.46944	5.03595	0.0329027	1
114915	NA	EPB41L4A-AS1	EPB41L4A antisense RNA 1	-1.09767	4.07964	5.03557	0.0329088	1
57413	ENSG00000121933	TMIGD3	transmembrane and immunoglobulin domain containing 3	1.09227	4.38976	5.0288	0.0330175	1
23233	ENSG00000144036	EXOC6B	exocyst complex component 6B	-0.578804	7.42758	5.02874	0.0330183	1
122616	ENSG00000140104	CLBA1	clathrin binding box of aftiphilin containing 1	-3.0308	0.906402	5.11402	0.0330559	1
118987	ENSG00000165650	PDZD8	PDZ domain containing 8	-0.951577	4.31577	5.02588	0.0330644	1
1622	ENSG00000155368	DBI	diazepam binding inhibitor, acyl-CoA binding protein	0.663393	7.30948	5.0186	0.0331818	1
4670	ENSG00000099783	HNRNPM	heterogeneous nuclear ribonucleoprotein M	-0.613447	6.13614	5.00666	0.0333755	1
27335	ENSG00000178982	EIF3K	eukaryotic translation initiation factor 3 subunit K	0.562723	6.0874	5.00228	0.0334467	1
11179	ENSG00000198839	ZNF277	zinc finger protein 277	-1.18089	3.6332	5.00204	0.0334507	1
1776	ENSG00000163687	DNASE1L3	deoxyribonuclease 1 like 3	-1.92836	3.03952	4.99221	0.0336113	1
152189	ENSG00000170293	CMTM8	CKLF like MARVEL transmembrane domain containing 8	-0.914506	3.44256	4.98994	0.0336487	1
5443	ENSG00000115138	POMC	proopiomelanocortin	-3.27385	0.978587	5.07418	0.0336842	1
5145	ENSG00000132915	PDE6A	phosphodiesterase 6A	-3.62629	1.0846	5.07364	0.0336928	1
84440	ENSG00000131242	RAB11FIP4	RAB11 family interacting protein 4	-0.791204	4.08167	4.98382	0.0337491	1
10952	ENSG00000106803	SEC61B	SEC61 translocon subunit beta	-0.797163	6.50679	4.97822	0.0338416	1
102724965	NA	LOC102724965	uncharacterized LOC102724965	-3.23157	0.967845	5.06162	0.0338851	1
2805	ENSG00000120053	GOT1	glutamic-oxaloacetic transaminase 1	0.980562	4.52846	4.96275	0.0340982	1
54903	ENSG00000011143	MKS1	MKS transition zone complex subunit 1	-2.0186	1.81825	4.96146	0.0341197	1
100134317	NA	LOC100134317	uncharacterized LOC100134317	-3.13714	0.929015	5.03901	0.03425	1
55072	ENSG00000092098	RNF31	ring finger protein 31	1.18376	2.66573	4.95117	0.0342917	1
80055	ENSG00000197121	PGAP1	post-GPI attachment to proteins inositol deacylase 1	-1.29529	2.82705	4.94453	0.0344031	1
128272	ENSG00000142632	ARHGEF19	Rho guanine nucleotide exchange factor 19	-1.50775	2.13873	4.94043	0.0344721	1
153642	ENSG00000164291	ARSK	arylsulfatase family member K	-1.55627	2.32309	4.94039	0.0344728	1
1491	ENSG00000116761	CTH	cystathionine gamma-lyase	-4.44059	1.39233	5.01859	0.0345833	1
89927	ENSG00000166780	BMERB1	bMERB domain containing 1	-3.33942	0.994565	5.01305	0.0346744	1
166614	ENSG00000170390	DCLK2	doublecortin like kinase 2	-3.18702	0.94985	5.01158	0.0346986	1
441502	NA	RPS26P11	ribosomal protein S26 pseudogene 11	-0.815234	6.65468	4.92211	0.0347825	1
199	ENSG00000204472	AIF1	allograft inflammatory factor 1	0.660232	5.93161	4.91818	0.0348495	1
10558	ENSG00000090054	SPTLC1	serine palmitoyltransferase long chain base subunit 1	0.852125	5.48973	4.91131	0.0349669	1
644192	ENSG00000247809	NR2F2-AS1	NR2F2 antisense RNA 1	1.86195	1.81782	4.90864	0.0350127	1
8942	ENSG00000115919	KYNU	kynureninase	0.852083	6.28757	4.90799	0.0350238	1
50808	ENSG00000147853	AK3	adenylate kinase 3	-0.648034	5.12995	4.90615	0.0350555	1
54762	ENSG00000178075	GRAMD1C	GRAM domain containing 1C	1.22451	3.04494	4.90097	0.0351446	1
2323	ENSG00000090554	FLT3LG	fms related receptor tyrosine kinase 3 ligand	-2.60073	1.38711	4.89999	0.0351615	1
6709	ENSG00000197694	SPTAN1	spectrin alpha, non-erythrocytic 1	-0.913319	4.00584	4.89966	0.0351671	1
282991	ENSG00000196072	BLOC1S2	biogenesis of lysosomal organelles complex 1 subunit 2	-0.961029	3.9137	4.8986	0.0351853	1
100507053	ENSG00000246090	LOC100507053	uncharacterized LOC100507053	-3.23191	0.948081	4.98096	0.0352073	1
23630	ENSG00000176076	KCNE5	potassium voltage-gated channel subfamily E regulatory subunit 5	-2.17841	1.6278	4.89515	0.0352449	1
307	ENSG00000196975	ANXA4	annexin A4	1.11298	8.98045	4.88103	0.0354898	1
1668	ENSG00000239839	DEFA3	defensin alpha 3	1.43421	7.30084	4.87637	0.0355711	1
1667	ENSG00000206047	DEFA1	defensin alpha 1	1.4365	7.29092	4.8743	0.0356071	1
9718	ENSG00000145194	ECE2	endothelin converting enzyme 2	0.849994	3.71159	4.87045	0.0356745	1
1153	ENSG00000099622	CIRBP	cold inducible RNA binding protein	-0.694047	6.23947	4.86585	0.0357552	1
144097	ENSG00000168005	SPINDOC	spindlin interactor and repressor of chromatin binding	-0.886535	4.3727	4.86408	0.0357863	1
339166	ENSG00000284837	LOC339166	uncharacterized LOC339166	-3.18716	0.949625	4.94421	0.0358286	1
6578	ENSG00000174640	SLCO2A1	solute carrier organic anion transporter family member 2A1	0.644805	6.13248	4.86125	0.035836	1
140885	ENSG00000198053	SIRPA	signal regulatory protein alpha	-0.880601	4.52715	4.85998	0.0358583	1
10480	ENSG00000149100	EIF3M	eukaryotic translation initiation factor 3 subunit M	0.570841	7.41104	4.85939	0.0358688	1
414235	ENSG00000180525	DIP2C-AS1	DIP2C antisense RNA 1	2.05454	1.26738	4.85813	0.035891	1
153768	ENSG00000186314	PRELID2	PRELI domain containing 2	-3.71468	1.12491	4.93589	0.0359711	1
100126780	NA	SNAR-G1	small NF90 (ILF3) associated RNA G1	1.05985	2.53268	4.85199	0.0359994	1
146225	ENSG00000140932	CMTM2	CKLF like MARVEL transmembrane domain containing 2	1.75935	1.68431	4.85109	0.0360153	1
25814	ENSG00000130638	ATXN10	ataxin 10	-0.804485	4.31373	4.84958	0.036042	1
317749	ENSG00000187630	DHRS4L2	dehydrogenase/reductase 4 like 2	-1.41133	3.15327	4.84854	0.0360605	1
100289574	NA	HERC2P4	HERC2 pseudogene 4	1.90223	1.54267	4.8449	0.0361251	1
27145	ENSG00000118407	FILIP1	filamin A interacting protein 1	1.48735	2.51703	4.83919	0.0362267	1
128025	ENSG00000162843	WDR64	WD repeat domain 64	-3.17621	0.93567	4.91731	0.0362912	1
1478	ENSG00000101811	CSTF2	cleavage stimulation factor subunit 2	-1.55835	2.2013	4.83288	0.0363391	1
101243545	ENSG00000240567	LINC02067	long intergenic non-protein coding RNA 2067	0.637838	8.7703	4.82755	0.0364347	1
285966	ENSG00000170379	TCAF2	TRPM8 channel associated factor 2	-0.863972	3.43026	4.82684	0.0364473	1
3117	ENSG00000196735	HLA-DQA1	major histocompatibility complex, class II, DQ alpha 1	1.80608	1.81769	4.82403	0.0364977	1
7248	ENSG00000165699	TSC1	TSC complex subunit 1	0.749474	4.23539	4.81547	0.0366518	1
388722	ENSG00000203724	C1orf53	chromosome 1 open reading frame 53	-1.6721	2.30143	4.81536	0.0366538	1
9619	ENSG00000160179	ABCG1	ATP binding cassette subfamily G member 1	-0.947822	4.14128	4.81333	0.0366905	1
5155	ENSG00000100311	PDGFB	platelet derived growth factor subunit B	-0.674903	5.47818	4.81278	0.0367004	1
3656	ENSG00000134070	IRAK2	interleukin 1 receptor associated kinase 2	-2.26411	1.24112	4.80699	0.0368052	1
51133	ENSG00000136636	KCTD3	potassium channel tetramerization domain containing 3	-0.685131	4.73797	4.80535	0.0368349	1
197322	ENSG00000176715	ACSF3	acyl-CoA synthetase family member 3	1.91018	1.29665	4.80146	0.0369056	1
8848	ENSG00000102804	TSC22D1	TSC22 domain family member 1	-0.620621	7.79113	4.80143	0.036906	1
22818	ENSG00000111481	COPZ1	COPI coat complex subunit zeta 1	0.817129	6.88404	4.8001	0.0369303	1
231	ENSG00000085662	AKR1B1	aldo-keto reductase family 1 member B	-0.612483	7.74959	4.79857	0.0369582	1
634	ENSG00000079385	CEACAM1	CEA cell adhesion molecule 1	-1.35908	2.95842	4.79588	0.0370071	1
150383	ENSG00000205643	CDPF1	cysteine rich DPF motif domain containing 1	-2.10317	1.58117	4.79256	0.0370678	1
730051	ENSG00000204514	ZNF814	zinc finger protein 814	0.821635	3.57825	4.78999	0.0371148	1
1521	ENSG00000172543	CTSW	cathepsin W	2.24279	0.769597	4.78564	0.0371945	1
728358	ENSG00000240247	DEFA1B	defensin alpha 1B	1.42059	7.28511	4.78063	0.0372864	1
100462981	NA	MTRNR2L2	MT-RNR2 like 2 (pseudogene)	0.767072	10.6158	4.77596	0.0373724	1
25809	ENSG00000100271	TTLL1	TTL family tubulin polyglutamylase complex subunit L1	-3.48157	1.04689	4.84382	0.0375896	1
9154	ENSG00000156222	SLC28A1	solute carrier family 28 member 1	1.38139	2.67571	4.76277	0.0376165	1
87	ENSG00000072110	ACTN1	actinin alpha 1	-0.653376	4.71747	4.76205	0.03763	1
10758	ENSG00000056972	TRAF3IP2	TRAF3 interacting protein 2	0.708348	4.80812	4.75843	0.0376972	1
51650	ENSG00000090263	MRPS33	mitochondrial ribosomal protein S33	0.663751	5.19632	4.75685	0.0377267	1
3131	ENSG00000108924	HLF	HLF transcription factor, PAR bZIP family member	-0.840527	4.28588	4.75046	0.0378459	1
3693	ENSG00000082781	ITGB5	integrin subunit beta 5	-0.602813	6.04721	4.75039	0.0378473	1
1241	ENSG00000213903	LTB4R	leukotriene B4 receptor	-2.91613	0.87434	4.82839	0.0378688	1
858	ENSG00000105971	CAV2	caveolin 2	-0.794675	5.11867	4.74901	0.0378731	1
79861	ENSG00000178462	TUBAL3	tubulin alpha like 3	-3.29487	0.982219	4.8268	0.0378977	1
100101490	ENSG00000101898	MCTS2	MCTS family member 2	0.755767	4.04733	4.74285	0.0379884	1
124045	ENSG00000167523	SPATA33	spermatogenesis associated 33	-3.25435	0.965482	4.81875	0.0380444	1
57567	ENSG00000166188	ZNF319	zinc finger protein 319	-1.60708	1.85688	4.73881	0.0380644	1
1769	ENSG00000124721	DNAH8	dynein axonemal heavy chain 8	-3.58813	1.0636	4.81724	0.038072	1
115827	ENSG00000152932	RAB3C	RAB3C, member RAS oncogene family	-3.70004	1.11352	4.81549	0.038104	1
51760	ENSG00000103528	SYT17	synaptotagmin 17	-1.57095	2.14665	4.73582	0.0381208	1
90025	ENSG00000118420	UBE3D	ubiquitin protein ligase E3D	2.2479	1.71316	4.73548	0.038127	1
26251	ENSG00000178342	KCNG2	potassium voltage-gated channel modifier subfamily G member 2	-3.62344	1.10703	4.81194	0.038169	1
304	NA	ANXA2P2	annexin A2 pseudogene 2	0.639832	8.00354	4.73102	0.0382113	1
5690	ENSG00000126067	PSMB2	proteasome 20S subunit beta 2	0.61831	8.19507	4.72926	0.0382445	1
1520	ENSG00000163131	CTSS	cathepsin S	0.709833	5.83352	4.72202	0.0383818	1
11320	ENSG00000071073	MGAT4A	alpha-1,3-mannosyl-glycoprotein 4-beta-N-acetylglucosaminyltransferase A	-0.777277	4.14214	4.72163	0.0383892	1
7512	ENSG00000122121	XPNPEP2	X-prolyl aminopeptidase 2	1.77679	1.65376	4.72122	0.0383969	1
2548	ENSG00000171298	GAA	alpha glucosidase	-0.815932	6.25416	4.71772	0.0384635	1
653479	NA	MRPL45P2	mitochondrial ribosomal protein L45 pseudogene 2	1.26262	2.71065	4.71694	0.0384784	1
56849	ENSG00000182916	TCEAL7	transcription elongation factor A like 7	-2.46568	1.33501	4.70014	0.0387998	1
5553	ENSG00000186652	PRG2	proteoglycan 2, pro eosinophil major basic protein	-2.15657	9.83722	4.69976	0.038807	1
644068	NA	RPS14P3	ribosomal protein S14 pseudogene 3	0.69013	10.1456	4.69891	0.0388233	1
7436	ENSG00000147852	VLDLR	very low density lipoprotein receptor	-1.33442	2.99632	4.69679	0.0388643	1
4064	ENSG00000134061	CD180	CD180 molecule	2.30188	0.875213	4.69439	0.0389105	1
158067	ENSG00000165695	AK8	adenylate kinase 8	-3.92433	1.17717	4.77089	0.0389299	1
57146	ENSG00000011638	LDAF1	lipid droplet assembly factor 1	-1.55111	2.3054	4.69145	0.0389673	1
56954	ENSG00000114021	NIT2	nitrilase family member 2	0.740451	3.87095	4.67898	0.0392088	1
150962	ENSG00000162927	PUS10	pseudouridine synthase 10	1.28827	2.51596	4.67762	0.0392352	1
84268	ENSG00000129197	RPAIN	RPA interacting protein	0.58157	5.75835	4.67613	0.0392644	1
112858	ENSG00000172315	TP53RK	TP53 regulating kinase	-1.13268	2.81234	4.67188	0.0393471	1
10139	ENSG00000101246	ARFRP1	ADP ribosylation factor related protein 1	-0.843956	3.66569	4.66936	0.0393964	1
6744	ENSG00000138434	ITPRID2	ITPR interacting domain containing 2	-0.591629	6.84551	4.66702	0.0394422	1
8399	ENSG00000069764	PLA2G10	phospholipase A2 group X	-3.67434	1.11528	4.73477	0.0396132	1
728621	ENSG00000186409	CCDC30	coiled-coil domain containing 30	1.48568	2.22051	4.65498	0.0396786	1
6646	ENSG00000057252	SOAT1	sterol O-acyltransferase 1	-0.835477	4.32623	4.6548	0.0396821	1
113157	ENSG00000243742	RPLP0P2	ribosomal protein lateral stalk subunit P0 pseudogene 2	-0.621554	5.77612	4.65472	0.0396837	1
101154753	ENSG00000281450	PANDAR	promoter of CDKN1A antisense DNA damage activated RNA	0.906981	3.40614	4.65015	0.039774	1
114548	ENSG00000162711	NLRP3	NLR family pyrin domain containing 3	1.8078	1.52045	4.65009	0.0397752	1
671	ENSG00000101425	BPI	bactericidal permeability increasing protein	-3.37652	1.01894	4.72311	0.0398367	1
222546	ENSG00000185002	RFX6	regulatory factor X6	-3.15998	0.94349	4.71933	0.0399095	1
440712	ENSG00000263961	RHEX	regulator of hemoglobinization and erythroid cell expansion	-2.75746	0.834838	5.06102	0.0400148	1
238	ENSG00000171094	ALK	ALK receptor tyrosine kinase	-2.7666	0.83671	5.67321	0.0400148	1
139728	ENSG00000130822	PNCK	pregnancy up-regulated nonubiquitous CaM kinase	-2.77841	0.839088	5.02286	0.0400148	1
8969	ENSG00000196787	H2AC11	H2A clustered histone 11	-2.81628	0.845881	4.85837	0.0400148	1
100131257	NA	LOC100131257	zinc finger protein 655 pseudogene	1.80521	1.30965	4.63673	0.0400401	1
9141	ENSG00000105185	PDCD5	programmed cell death 5	-0.738934	4.79804	4.63575	0.0400596	1
1952	ENSG00000143126	CELSR2	cadherin EGF LAG seven-pass G-type receptor 2	1.9996	1.05781	4.63422	0.04009	1
203562	ENSG00000179363	TMEM31	transmembrane protein 31	1.9648	1.0577	4.63332	0.0401079	1
10901	ENSG00000157326	DHRS4	dehydrogenase/reductase 4	-1.35468	3.11405	4.63284	0.0401176	1
692198	NA	SNORD78	small nucleolar RNA, C/D box 78	-2.95056	0.880604	4.70821	0.0401245	1
147650	ENSG00000182310	SPACA6	sperm acrosome associated 6	1.16038	3.20255	4.63148	0.0401447	1
7409	ENSG00000141968	VAV1	vav guanine nucleotide exchange factor 1	-3.47431	1.0445	4.70665	0.0401547	1
7024	ENSG00000135457	TFCP2	transcription factor CP2	-0.837564	3.76336	4.63023	0.0401696	1
57016	ENSG00000198074	AKR1B10	aldo-keto reductase family 1 member B10	2.13228	0.832058	4.62967	0.0401809	1
406881	ENSG00000199165	MIRLET7A1	microRNA let-7a-1	-2.90019	0.870939	4.69298	0.0404208	1
55089	ENSG00000139209	SLC38A4	solute carrier family 38 member 4	-2.31269	1.33015	4.61105	0.0405548	1
7113	ENSG00000184012	TMPRSS2	transmembrane serine protease 2	-2.97737	0.886306	4.68379	0.040601	1
4477	ENSG00000263639	MSMB	microseminoprotein beta	-3.02227	0.904447	4.68222	0.0406318	1
871	ENSG00000149257	SERPINH1	serpin family H member 1	-0.561489	5.62436	4.60571	0.0406627	1
23368	ENSG00000088808	PPP1R13B	protein phosphatase 1 regulatory subunit 13B	1.14734	2.32004	4.60331	0.0407115	1
646670	NA	NA	NA	-2.97919	0.886517	4.67519	0.0407703	1
732265	NA	COMMD4P2	COMM domain containing 4 pseudogene 2	-2.97919	0.886517	4.67519	0.0407703	1
441425	ENSG00000290971	ANKRD20A3P	ankyrin repeat domain 20 family member A3, pseudogene	1.41093	2.32973	4.59915	0.0407957	1
79152	ENSG00000103089	FA2H	fatty acid 2-hydroxylase	2.12815	0.737502	4.69554	0.0408061	1
151126	ENSG00000144331	ZNF385B	zinc finger protein 385B	2.12815	0.737502	4.69554	0.0408061	1
100189315	NA	TRX-CAT1-7	tRNA-iMet (anticodon CAT) 1-7	2.11944	0.726434	4.99791	0.0408061	1
81285	ENSG00000167332	OR51E2	olfactory receptor family 51 subfamily E member 2	2.20984	0.741105	4.92989	0.0408061	1
80332	ENSG00000149451	ADAM33	ADAM metallopeptidase domain 33	2.17412	0.731209	5.03562	0.0408061	1
677797	ENSG00000207088	SNORA7B	small nucleolar RNA, H/ACA box 7B	2.17476	0.734258	4.9364	0.0408061	1
7957	ENSG00000112425	EPM2A	EPM2A glucan phosphatase, laforin	2.29419	0.742094	4.74964	0.0408061	1
220047	ENSG00000150676	CCDC83	coiled-coil domain containing 83	2.29526	0.745153	5.09495	0.0408061	1
399949	ENSG00000183644	HOATZ	HOATZ cilia and flagella associated protein	2.25821	0.734325	4.74706	0.0408061	1
100303453	ENSG00000270106	TSNAX-DISC1	TSNAX-DISC1 readthrough (NMD candidate)	2.34306	0.742174	4.88394	0.0408061	1
3779	ENSG00000145936	KCNMB1	potassium calcium-activated channel subfamily M regulatory beta subunit 1	-3.15014	0.939382	4.67285	0.0408166	1
545	ENSG00000175054	ATR	ATR serine/threonine kinase	0.725082	3.91266	4.59725	0.0408344	1
91977	ENSG00000164591	MYOZ3	myozenin 3	-2.99258	0.898037	4.67069	0.0408592	1
51507	ENSG00000022277	RTF2	replication termination factor 2	0.623491	6.67685	4.5948	0.0408843	1
54914	ENSG00000188352	FOCAD	focadhesin	0.596712	4.69276	4.59104	0.040961	1
2792	ENSG00000127928	GNGT1	G protein subunit gamma transducin 1	-1.05544	6.16125	4.58307	0.0411241	1
51530	ENSG00000091732	ZC3HC1	zinc finger C3HC-type containing 1	1.29497	3.70662	4.58177	0.0411506	1
128178	ENSG00000186197	EDARADD	EDAR associated via death domain	0.658393	5.67876	4.577	0.0412487	1
102724539	ENSG00000227634	LINC01714	long intergenic non-protein coding RNA 1714	-3.20586	0.952419	4.65109	0.0412491	1
4496	ENSG00000205358	MT1H	metallothionein 1H	-3.1539	0.94232	4.64943	0.0412823	1
468	ENSG00000128272	ATF4	activating transcription factor 4	0.523038	6.49347	4.57365	0.0413177	1
101927884	ENSG00000231172	EVA1A-AS	EVA1A antisense RNA	-3.00917	0.901508	4.64735	0.0413239	1
103504734	ENSG00000283475	MIR1244-4	microRNA 1244-4	-0.65819	5.05577	4.56349	0.0415277	1
285759	ENSG00000175967	LINC02880	long intergenic non-protein coding RNA 2880	2.12382	0.741536	4.55653	0.0416723	1
105376525	NA	NA	NA	1.97328	1.00491	4.54837	0.0418423	1
4832	ENSG00000103024	NME3	NME/NM23 nucleoside diphosphate kinase 3	-1.36947	2.43201	4.54643	0.0418829	1
693220	ENSG00000207561	MIR635	microRNA 635	-3.05384	0.902248	4.61661	0.0419449	1
3965	ENSG00000168961	LGALS9	galectin 9	1.23013	2.63858	4.54271	0.0419609	1
105369153	NA	NA	NA	2.06825	0.826093	4.541	0.0419968	1
112487	ENSG00000129480	DTD2	D-aminoacyl-tRNA deacylase 2	-1.44777	2.07386	4.53986	0.0420207	1
5348	ENSG00000266964	FXYD1	FXYD domain containing ion transport regulator 1	-2.65983	1.81457	4.53962	0.0420257	1
151188	ENSG00000177917	ARL6IP6	ADP ribosylation factor like GTPase 6 interacting protein 6	-0.651143	4.75169	4.53945	0.0420293	1
10186	ENSG00000183722	LHFPL6	LHFPL tetraspan subfamily member 6	-1.00781	4.29778	4.53905	0.0420376	1
101929127	ENSG00000277631	PGM5P3-AS1	PGM5P3 antisense RNA 1	-3.21934	0.957376	4.61158	0.0420475	1
9218	ENSG00000101558	VAPA	VAMP associated protein A	-0.556418	6.33521	4.53708	0.0420791	1
10581	ENSG00000185201	IFITM2	interferon induced transmembrane protein 2	0.589766	7.24216	4.53496	0.0421238	1
58477	ENSG00000144867	SRPRB	SRP receptor subunit beta	-0.810511	4.32042	4.53328	0.0421592	1
340527	ENSG00000204131	NHSL2	NHS like 2	-2.2925	1.27642	4.53271	0.0421712	1
55320	ENSG00000129534	MIS18BP1	MIS18 binding protein 1	-0.952613	3.84075	4.53264	0.0421725	1
51360	ENSG00000012174	MBTPS2	membrane bound transcription factor peptidase, site 2	-0.960921	3.80478	4.5303	0.042222	1
57820	ENSG00000100814	CCNB1IP1	cyclin B1 interacting protein 1	-1.77633	1.87836	4.52743	0.0422827	1
28957	ENSG00000147586	MRPS28	mitochondrial ribosomal protein S28	0.561574	5.64621	4.52695	0.0422927	1
9793	ENSG00000175216	CKAP5	cytoskeleton associated protein 5	0.667305	4.81251	4.52575	0.042318	1
3045	ENSG00000223609	HBD	hemoglobin subunit delta	1.06366	7.31824	4.52518	0.0423302	1
440295	ENSG00000197978	GOLGA6L9	golgin A6 family like 9	1.4878	1.86316	4.52315	0.0423731	1
122961	ENSG00000165898	ISCA2	iron-sulfur cluster assembly 2	-1.00967	3.06398	4.51221	0.0426057	1
440292	NA	COMMD4P1	COMM domain containing 4 pseudogene 1	-2.73102	0.829381	4.58106	0.0426764	1
79980	ENSG00000149636	DSN1	DSN1 component of MIS12 kinetochore complex	0.743804	4.20571	4.50456	0.0427693	1
23371	ENSG00000111077	TNS2	tensin 2	-2.74238	0.831789	4.57536	0.0427949	1
114132	ENSG00000161640	SIGLEC11	sialic acid binding Ig like lectin 11	2.15696	0.864858	4.50256	0.0428122	1
79643	ENSG00000176108	CHMP6	charged multivesicular body protein 6	-1.61963	2.2854	4.50143	0.0428364	1
90737	ENSG00000158639	PAGE5	PAGE family member 5	1.77855	1.47389	4.50108	0.042844	1
91300	ENSG00000198858	R3HDM4	R3H domain containing 4	-1.14256	2.90663	4.49923	0.0428837	1
729648	NA	ZNF812P	zinc finger protein 812, pseudogene	1.87513	1.22643	4.49848	0.0428997	1
64115	ENSG00000107738	VSIR	V-set immunoregulatory receptor	-0.724574	6.97887	4.496	0.042953	1
1267	ENSG00000173786	CNP	2',3'-cyclic nucleotide 3' phosphodiesterase	-2.7442	0.832098	4.56639	0.0429823	1
6640	ENSG00000101400	SNTA1	syntrophin alpha 1	2.21785	0.739561	4.49456	0.0429841	1
100134869	ENSG00000291162	UBE2Q2P2	UBE2Q2 pseudogene 2	1.66907	1.5562	4.49392	0.0429979	1
1795	ENSG00000088538	DOCK3	dedicator of cytokinesis 3	-3.70096	1.07219	4.56306	0.043052	1
2936	ENSG00000104687	GSR	glutathione-disulfide reductase	-0.535087	6.11494	4.48881	0.043108	1
4707	ENSG00000183648	NDUFB1	NADH:ubiquinone oxidoreductase subunit B1	0.521381	6.83744	4.48851	0.0431145	1
1801	ENSG00000108963	DPH1	diphthamide biosynthesis 1	-3.40528	1.01931	4.55757	0.0431674	1
219833	ENSG00000174370	KCNJ5-AS1	KCNJ5 antisense RNA 1	-2.85182	0.860588	4.55552	0.0432106	1
2731	ENSG00000178445	GLDC	glycine decarboxylase	-1.0913	3.31519	4.47808	0.0433405	1
339535	ENSG00000215808	LINC01139	long intergenic non-protein coding RNA 1139	-3.14715	0.931987	4.54882	0.0433519	1
326625	ENSG00000139428	MMAB	metabolism of cobalamin associated B	-1.15434	3.32671	4.47681	0.0433682	1
163882	ENSG00000162852	CNST	consortin, connexin sorting protein	-0.727309	4.50149	4.47655	0.0433738	1
3705	ENSG00000100605	ITPK1	inositol-tetrakisphosphate 1-kinase	-0.742727	4.42474	4.47451	0.0434184	1
283038	ENSG00000228021	LOC283038	uncharacterized LOC283038	2.10502	0.724602	4.47376	0.0434347	1
7372	ENSG00000114491	UMPS	uridine monophosphate synthetase	0.576038	5.8292	4.47223	0.0434681	1
5046	ENSG00000140479	PCSK6	proprotein convertase subtilisin/kexin type 6	-1.34585	3.08309	4.4707	0.0435014	1
644961	NA	ACTG1P20	actin gamma 1 pseudogene 20	-0.687932	4.43955	4.46883	0.0435423	1
51312	ENSG00000147454	SLC25A37	solute carrier family 25 member 37	-0.806158	3.96056	4.46845	0.0435505	1
140612	ENSG00000196867	ZFP28	ZFP28 zinc finger protein	1.63789	1.71225	4.46645	0.0435943	1
3916	ENSG00000185896	LAMP1	lysosomal associated membrane protein 1	-0.554003	6.68699	4.46156	0.0437014	1
342538	ENSG00000253506	NACA2	nascent polypeptide associated complex subunit alpha 2	0.539113	8.2927	4.46102	0.0437132	1
102724428	ENSG00000275993	LOC102724428	salt inducible kinase 1B (putative)	-1.08344	3.14583	4.45377	0.0438726	1
283335	ENSG00000257337	TNS2-AS1	TNS2 antisense RNA 1	2.05595	0.720374	4.44873	0.0439838	1
101927289	ENSG00000233806	LINC01237	long intergenic non-protein coding RNA 1237	2.05595	0.720374	4.44873	0.0439838	1
58160	ENSG00000230257	NFE4	nuclear factor, erythroid 4	2.05595	0.720374	4.44873	0.0439838	1
3294	ENSG00000086696	HSD17B2	hydroxysteroid 17-beta dehydrogenase 2	0.63938	7.90539	4.44249	0.044122	1
10038	ENSG00000129484	PARP2	poly(ADP-ribose) polymerase 2	-1.11393	2.78534	4.4424	0.0441239	1
54033	ENSG00000185272	RBM11	RNA binding motif protein 11	-2.96339	0.89094	4.50868	0.0442101	1
84750	ENSG00000172728	FUT10	fucosyltransferase 10	1.3086	2.35905	4.43774	0.0442275	1
55287	ENSG00000088726	TMEM40	transmembrane protein 40	0.69257	7.14669	4.43697	0.0442446	1
284047	ENSG00000291090	CCDC144BP	coiled-coil domain containing 144B, pseudogene	1.13614	4.36156	4.4352	0.0442839	1
253559	ENSG00000175161	CADM2	cell adhesion molecule 2	2.08615	0.726535	4.43127	0.0443714	1
178	ENSG00000162688	AGL	amylo-alpha-1, 6-glucosidase, 4-alpha-glucanotransferase	-0.626773	4.90588	4.42788	0.0444473	1
9145	ENSG00000100321	SYNGR1	synaptogyrin 1	-1.01621	3.50871	4.42769	0.0444515	1
6278	ENSG00000143556	S100A7	S100 calcium binding protein A7	1.76203	2.48733	4.42727	0.0444608	1
682	ENSG00000172270	BSG	basigin (Ok blood group)	-1.1132	6.9505	4.42551	0.0445002	1
10690	ENSG00000172461	FUT9	fucosyltransferase 9	-2.81179	0.845887	4.4912	0.0445896	1
57480	ENSG00000120278	PLEKHG1	pleckstrin homology and RhoGEF domain containing G1	-0.912771	3.40229	4.42123	0.0445962	1
9179	ENSG00000221838	AP4M1	adaptor related protein complex 4 subunit mu 1	-2.99471	0.897967	4.48848	0.044649	1
8891	ENSG00000070785	EIF2B3	eukaryotic translation initiation factor 2B subunit gamma	1.22707	4.01896	4.40965	0.0448568	1
150684	ENSG00000173163	COMMD1	copper metabolism domain containing 1	0.658681	5.89025	4.40786	0.0448973	1
8840	ENSG00000104415	CCN4	cellular communication network factor 4	-2.8358	0.85714	4.47493	0.0449464	1
79017	ENSG00000006625	GGCT	gamma-glutamylcyclotransferase	-0.549925	5.85167	4.40552	0.0449501	1
334	ENSG00000084234	APLP2	amyloid beta precursor like protein 2	-0.608701	7.85417	4.39073	0.0452863	1
26227	ENSG00000092621	PHGDH	phosphoglycerate dehydrogenase	-1.87502	2.54005	4.38999	0.0453032	1
114984	ENSG00000162076	FLYWCH2	FLYWCH family member 2	-2.24776	1.31267	4.38592	0.0453964	1
54622	ENSG00000185305	ARL15	ADP ribosylation factor like GTPase 15	0.954189	3.64572	4.38538	0.0454087	1
103344932	ENSG00000231943	PGM5P4-AS1	PGM5P4 antisense RNA 1	-3.09139	0.920074	4.45032	0.0454919	1
6511	ENSG00000105143	SLC1A6	solute carrier family 1 member 6	-3.92019	1.21098	4.44983	0.0455029	1
222236	ENSG00000161048	NAPEPLD	N-acyl phosphatidylethanolamine phospholipase D	0.827917	3.3581	4.38099	0.0455093	1
84868	ENSG00000135077	HAVCR2	hepatitis A virus cellular receptor 2	1.44974	2.04111	4.37735	0.0455929	1
64097	ENSG00000129595	EPB41L4A	erythrocyte membrane protein band 4.1 like 4A	-0.818121	3.80824	4.3738	0.0456747	1
3959	ENSG00000108679	LGALS3BP	galectin 3 binding protein	-0.824953	4.73767	4.3725	0.0457046	1
8664	ENSG00000100353	EIF3D	eukaryotic translation initiation factor 3 subunit D	0.617353	6.76916	4.36239	0.0459383	1
3177	ENSG00000174669	SLC29A2	solute carrier family 29 member 2	-1.15175	3.03873	4.35821	0.0460354	1
80195	ENSG00000133678	TMEM254	transmembrane protein 254	-0.605962	6.03479	4.35675	0.0460694	1
1603	ENSG00000129562	DAD1	defender against cell death 1	0.577334	7.44482	4.35645	0.0460764	1
55176	ENSG00000065665	SEC61A2	SEC61 translocon subunit alpha 2	-2.27606	1.2784	4.35347	0.0461458	1
93099	ENSG00000161249	DMKN	dermokine	-3.40094	1.00959	4.41976	0.0461797	1
79778	ENSG00000164877	MICALL2	MICAL like 2	-2.90044	0.870892	4.41404	0.0463097	1
105376526	NA	LOC105376526	uncharacterized LOC105376526	-1.63082	2.22739	4.34357	0.0463772	1
22974	ENSG00000088325	TPX2	TPX2 microtubule nucleation factor	-0.951498	3.73139	4.34246	0.0464033	1
150094	ENSG00000142178	SIK1	salt inducible kinase 1	-1.072	3.13814	4.33889	0.0464872	1
10361	ENSG00000158806	NPM2	nucleophosmin/nucleoplasmin 2	2.24077	0.73365	4.3344	0.0465928	1
4100	ENSG00000198681	MAGEA1	MAGE family member A1	1.89269	1.25014	4.33288	0.0466285	1
91851	ENSG00000101938	CHRDL1	chordin like 1	-4.18573	1.32498	4.39791	0.0466787	1
56923	ENSG00000132911	NMUR2	neuromedin U receptor 2	-3.06437	0.912678	4.39742	0.0466901	1
2145	ENSG00000108799	EZH1	enhancer of zeste 1 polycomb repressive complex 2 subunit	0.782389	4.395	4.33011	0.046694	1
100507373	ENSG00000267169	ADGRL1-AS1	ADGRL1 antisense RNA 1	2.12951	0.82797	4.33008	0.0466946	1
400997	ENSG00000204581	ACOXL-AS1	ACOXL antisense RNA 1	-3.20623	0.952736	4.39696	0.0467007	1
10311	ENSG00000157538	VPS26C	VPS26 endosomal protein sorting factor C	-0.686429	4.23771	4.32967	0.0467043	1
8195	ENSG00000125863	MKKS	MKKS centrosomal shuttling protein	-0.702254	5.41314	4.32797	0.0467445	1
1004	ENSG00000113361	CDH6	cadherin 6	-2.90753	0.872137	4.39488	0.0467485	1
10209	ENSG00000173812	EIF1	eukaryotic translation initiation factor 1	-0.811725	7.87924	4.32512	0.0468118	1
4261	ENSG00000179583	CIITA	class II major histocompatibility complex transactivator	2.10764	0.845003	4.31897	0.0469578	1
24145	ENSG00000110218	PANX1	pannexin 1	-0.978956	3.05218	4.31856	0.0469675	1
21	ENSG00000167972	ABCA3	ATP binding cassette subfamily A member 3	-2.23623	1.30153	4.31324	0.0470943	1
1432	ENSG00000112062	MAPK14	mitogen-activated protein kinase 14	-0.765172	4.24497	4.31077	0.0471532	1
7447	ENSG00000163032	VSNL1	visinin like 1	1.62204	1.78803	4.30527	0.0472847	1
4069	ENSG00000090382	LYZ	lysozyme	0.709855	4.51497	4.30393	0.0473169	1
677767	ENSG00000238741	SCARNA7	small Cajal body-specific RNA 7	1.0396	4.86745	4.3039	0.0473176	1
84167	ENSG00000105072	C19orf44	chromosome 19 open reading frame 44	2.06814	0.839731	4.30039	0.0474018	1
54826	ENSG00000145723	GIN1	gypsy retrotransposon integrase 1	1.06764	2.9114	4.30012	0.0474082	1
7644	ENSG00000167232	ZNF91	zinc finger protein 91	0.62381	5.72878	4.30009	0.047409	1
29101	ENSG00000160075	SSU72	SSU72 homolog, RNA polymerase II CTD phosphatase	-0.879203	4.7213	4.29553	0.0475185	1
80256	ENSG00000005238	ATOSB	atos homolog B	-0.822037	4.38898	4.29386	0.0475588	1
100652833	ENSG00000206356	LOC100652833	putative POM121-like protein 1-like	-2.97339	0.893688	4.35673	0.0476358	1
7697	ENSG00000197008	ZNF138	zinc finger protein 138	1.35104	2.33695	4.28923	0.0476705	1
6234	ENSG00000233927	RPS28	ribosomal protein S28	-0.54829	6.66914	4.2887	0.0476833	1
100129361	ENSG00000256537	SMIM10L1	small integral membrane protein 10 like 1	-0.788439	3.47187	4.28701	0.0477242	1
396	ENSG00000141522	ARHGDIA	Rho GDP dissociation inhibitor alpha	-0.613619	5.74348	4.28503	0.0477721	1
4298	ENSG00000130382	MLLT1	MLLT1 super elongation complex subunit	-0.571473	6.98714	4.28335	0.0478129	1
759	ENSG00000133742	CA1	carbonic anhydrase 1	1.33024	4.57158	4.28237	0.0478367	1
81689	ENSG00000135070	ISCA1	iron-sulfur cluster assembly 1	-0.613294	4.88591	4.28077	0.0478757	1
9150	ENSG00000060069	CTDP1	CTD phosphatase subunit 1	-0.660514	5.52455	4.27755	0.0479538	1
151242	ENSG00000150722	PPP1R1C	protein phosphatase 1 regulatory inhibitor subunit 1C	2.0214	1.01645	4.27343	0.0480542	1
100652777	NA	LOC100652777	group 10 secretory phospholipase A2	-3.03522	0.907797	4.3327	0.0482044	1
654434	ENSG00000234912	SNHG20	small nucleolar RNA host gene 20	-1.58986	1.85781	4.26629	0.0482286	1
2968	ENSG00000213780	GTF2H4	general transcription factor IIH subunit 4	-1.9516	1.49162	4.26584	0.0482398	1
375616	ENSG00000135253	KCP	kielin cysteine rich BMP regulator	2.0914	0.857251	4.26572	0.0482425	1
126433	ENSG00000161243	FBXO27	F-box protein 27	-2.3282	1.32809	4.26561	0.0482452	1
140738	ENSG00000171227	TMEM37	transmembrane protein 37	-0.728661	3.88123	4.26377	0.0482904	1
26156	ENSG00000171490	RSL1D1	ribosomal L1 domain containing 1	0.580973	6.8371	4.26366	0.048293	1
9476	ENSG00000131400	NAPSA	napsin A aspartic peptidase	2.09282	0.734459	4.26313	0.0483061	1
57187	ENSG00000125676	THOC2	THO complex subunit 2	0.531778	6.59044	4.26278	0.0483147	1
526	ENSG00000147416	ATP6V1B2	ATPase H+ transporting V1 subunit B2	-0.568702	7.48149	4.26001	0.0483827	1
10137	ENSG00000244462	RBM12	RNA binding motif protein 12	-0.717203	4.27236	4.25979	0.0483881	1
4534	ENSG00000171100	MTM1	myotubularin 1	-0.673532	4.25526	4.2584	0.0484224	1
442523	ENSG00000291119	DPY19L2P4	DPY19L2 pseudogene 4	-2.91714	0.874616	4.32274	0.0484425	1
7515	ENSG00000073050	XRCC1	X-ray repair cross complementing 1	0.743302	3.91207	4.25722	0.0484512	1
5805	ENSG00000150787	PTS	6-pyruvoyltetrahydropterin synthase	0.566832	5.02994	4.2556	0.0484911	1
22981	ENSG00000101004	NINL	ninein like	-1.93361	1.50341	4.25456	0.0485169	1
59345	ENSG00000114450	GNB4	G protein subunit beta 4	-0.960548	3.57047	4.25402	0.04853	1
11319	ENSG00000122882	ECD	ecdysoneless cell cycle regulator	0.940365	3.93839	4.25272	0.0485621	1
7314	ENSG00000170315	UBB	ubiquitin B	0.558227	8.11163	4.25173	0.0485867	1
1748	ENSG00000108813	DLX4	distal-less homeobox 4	-0.791127	4.70132	4.25019	0.0486246	1
1308	ENSG00000065618	COL17A1	collagen type XVII alpha 1 chain	-1.04598	4.61793	4.24881	0.0486589	1
6271	ENSG00000160678	S100A1	S100 calcium binding protein A1	2.00841	0.722437	4.24503	0.0487524	1
90	ENSG00000115170	ACVR1	activin A receptor type 1	-0.806602	3.62483	4.24126	0.0488458	1
22834	ENSG00000198740	ZNF652	zinc finger protein 652	-0.503549	5.8359	4.24039	0.0488675	1
63826	ENSG00000167720	SRR	serine racemase	1.69922	1.3691	4.23843	0.0489161	1
728323	NA	LINC01881	long intergenic non-protein coding RNA 1881	0.861044	3.77238	4.23754	0.0489383	1
23549	ENSG00000123992	DNPEP	aspartyl aminopeptidase	-0.671072	4.97595	4.23661	0.0489616	1
957	ENSG00000187097	ENTPD5	ectonucleoside triphosphate diphosphohydrolase 5 (inactive)	-1.71859	1.9454	4.23333	0.0490434	1
10062	ENSG00000025434	NR1H3	nuclear receptor subfamily 1 group H member 3	-1.27604	2.63914	4.23028	0.0491194	1
221150	ENSG00000165480	SKA3	spindle and kinetochore associated complex subunit 3	-2.44116	1.32729	4.22799	0.0491767	1
10370	ENSG00000164442	CITED2	Cbp/p300 interacting transactivator with Glu/Asp rich carboxy-terminal domain 2	-1.06172	3.84952	4.22595	0.0492277	1
340205	ENSG00000161911	TREML1	triggering receptor expressed on myeloid cells like 1	2.30896	0.748047	4.22325	0.0492954	1
5950	ENSG00000138207	RBP4	retinol binding protein 4	-3.76617	1.14948	4.28726	0.0493007	1
56125	ENSG00000197479	PCDHB11	protocadherin beta 11	2.0542	0.730978	4.22121	0.0493466	1
7336	ENSG00000169139	UBE2V2	ubiquitin conjugating enzyme E2 V2	0.597134	6.46571	4.21791	0.0494297	1
10134	ENSG00000185825	BCAP31	B cell receptor associated protein 31	0.561871	8.0166	4.20662	0.0497147	1
127255	ENSG00000162620	LRRIQ3	leucine rich repeats and IQ motif containing 3	-2.93112	0.877478	4.2682	0.0497691	1
81855	ENSG00000107819	SFXN3	sideroflexin 3	0.92629	3.53207	4.20366	0.0497897	1
2134	ENSG00000158008	EXTL1	exostosin like glycosyltransferase 1	1.42629	2.10064	4.19588	0.0499876	1
51705	ENSG00000164035	EMCN	endomucin	-3.73726	1.10089	4.25922	0.0499914	1
390660	ENSG00000274376	ADAMTS7P1	ADAMTS7 pseudogene 1	-1.9426	1.45185	4.1945	0.0500228	1
10552	ENSG00000241685	ARPC1A	actin related protein 2/3 complex subunit 1A	-0.733127	4.1059	4.19325	0.0500546	1
760	ENSG00000104267	CA2	carbonic anhydrase 2	-1.50917	2.45195	4.19269	0.050069	1
3418	ENSG00000182054	IDH2	isocitrate dehydrogenase (NADP(+)) 2	-0.877751	3.74314	4.19126	0.0501054	1
145748	ENSG00000183060	LYSMD4	LysM domain containing 4	2.07599	0.843456	4.18421	0.0502859	1
653781	ENSG00000222038	POTEJ	POTE ankyrin domain family member J	1.07624	3.13997	4.18392	0.0502935	1
6066	ENSG00000274585	RNU2-1	RNA, U2 small nuclear 1	0.837544	6.88791	4.18306	0.0503155	1
445328	ENSG00000213214	ARHGEF35	Rho guanine nucleotide exchange factor 35	0.641063	5.52527	4.18196	0.0503436	1
4725	ENSG00000168653	NDUFS5	NADH:ubiquinone oxidoreductase subunit S5	0.565782	7.49533	4.17895	0.0504211	1
143471	ENSG00000154611	PSMA8	proteasome 20S subunit alpha 8	-3.18089	0.948815	4.23848	0.0505092	1
9564	ENSG00000050820	BCAR1	BCAR1 scaffold protein, Cas family member	-0.710904	4.27644	4.175	0.0505227	1
353497	ENSG00000130997	POLN	DNA polymerase nu	-2.95335	0.881377	4.23745	0.050535	1
728730	ENSG00000231312	MAP4K3-DT	MAP4K3 divergent transcript	-1.14587	3.31706	4.16821	0.0506983	1
100133050	NA	GUSBP19	GUSB pseudogene 19	1.9341	0.819422	4.16571	0.0507631	1
4580	ENSG00000173171	MTX1	metaxin 1	-1.01143	3.92624	4.16349	0.0508205	1
29923	ENSG00000135245	HILPDA	hypoxia inducible lipid droplet associated	0.695146	4.82587	4.15937	0.0509278	1
165	ENSG00000106624	AEBP1	AE binding protein 1	-0.957522	5.05521	4.15824	0.0509572	1
1473	ENSG00000170367	CST5	cystatin D	-3.09902	0.922008	4.2185	0.0510137	1
1355	ENSG00000014919	COX15	cytochrome c oxidase assembly homolog COX15	0.695508	4.3617	4.15385	0.0510715	1
169436	ENSG00000198870	STKLD1	serine/threonine kinase like domain containing 1	2.1967	0.84882	4.15139	0.0511357	1
91419	ENSG00000166896	ATP23	ATP23 metallopeptidase and ATP synthase assembly factor homolog	-1.88651	1.76422	4.15099	0.0511464	1
5341	ENSG00000115956	PLEK	pleckstrin	0.829652	3.25193	4.15055	0.0511578	1
688	ENSG00000102554	KLF5	KLF transcription factor 5	-0.595342	5.90072	4.14042	0.0514234	1
4355	ENSG00000108852	MPP2	MAGUK p55 scaffold protein 2	-2.24917	1.27701	4.1388	0.0514661	1
100885778	ENSG00000233009	NALCN-AS1	NALCN antisense RNA 1	2.07383	0.737278	4.13598	0.0515405	1
201232	ENSG00000174327	SLC16A13	solute carrier family 16 member 13	1.76815	1.00285	4.13208	0.0516435	1
83955	ENSG00000228224	NACA4P	NACA family member 4, pseudogene	0.524206	8.10873	4.12927	0.0517178	1
3728	ENSG00000173801	JUP	junction plakoglobin	-0.790593	9.49295	4.12587	0.0518078	1
147660	ENSG00000258405	ZNF578	zinc finger protein 578	0.87713	2.88373	4.12217	0.0519061	1
57228	ENSG00000170545	SMAGP	small cell adhesion glycoprotein	0.527555	6.55248	4.12014	0.0519602	1
10640	ENSG00000070367	EXOC5	exocyst complex component 5	-0.562912	4.87879	4.11943	0.051979	1
221830	ENSG00000105849	POLR1F	RNA polymerase I subunit F	-0.892743	4.17226	4.11548	0.0520843	1
5936	ENSG00000173933	RBM4	RNA binding motif protein 4	0.75602	4.06467	4.11305	0.0521492	1
25903	ENSG00000162745	OLFML2B	olfactomedin like 2B	-1.03315	3.40928	4.11276	0.0521567	1
101927311	NA	LINC02185	long intergenic non-protein coding RNA 2185	2.17642	0.959186	4.1076	0.0522951	1
85013	ENSG00000132406	TMEM128	transmembrane protein 128	-0.955694	3.71914	4.10461	0.0523751	1
100133941	ENSG00000272398	CD24	CD24 molecule	-0.667215	6.05483	4.1005	0.0524857	1
6280	ENSG00000163220	S100A9	S100 calcium binding protein A9	-0.790983	7.27892	4.09719	0.0525749	1
100652758	ENSG00000275765	LOC100652758	uncharacterized LOC100652758	-2.73755	0.830795	4.15664	0.0526122	1
100422885	ENSG00000283498	MIR1244-2	microRNA 1244-2	-0.553653	6.05829	4.09553	0.0526197	1
4585	ENSG00000145113	MUC4	mucin 4, cell surface associated	-3.00371	0.900484	4.15514	0.0526515	1
2996	ENSG00000197465	GYPE	glycophorin E (MNS blood group)	1.26912	2.52358	4.09106	0.0527404	1
10675	ENSG00000114646	CSPG5	chondroitin sulfate proteoglycan 5	-2.75425	0.834342	4.15176	0.0527407	1
80317	ENSG00000189298	ZKSCAN3	zinc finger with KRAB and SCAN domains 3	-1.18218	2.43874	4.09077	0.0527483	1
83746	ENSG00000100395	L3MBTL2	L3MBTL histone methyl-lysine binding protein 2	0.942589	3.74505	4.08965	0.0527786	1
100188992	NA	TRV-AAC2-1	tRNA-Val (anticodon AAC) 2-1	2.14968	0.732605	4.08378	0.0529379	1
10254	ENSG00000115145	STAM2	signal transducing adaptor molecule 2	0.59083	4.65207	4.07978	0.0530465	1
3052	ENSG00000004961	HCCS	holocytochrome c synthase	-1.03704	3.12766	4.07886	0.0530715	1
22864	ENSG00000179912	R3HDM2	R3H domain containing 2	-0.61338	5.08657	4.07866	0.053077	1
153571	NA	IRX2-DT	IRX2 divergent transcript	-2.7725	0.838085	4.1389	0.053081	1
10954	ENSG00000065485	PDIA5	protein disulfide isomerase family A member 5	-0.836477	4.07107	4.07845	0.0530827	1
5608	ENSG00000108984	MAP2K6	mitogen-activated protein kinase kinase 6	-3.19251	0.957789	4.13366	0.0532204	1
9827	ENSG00000107185	RGP1	RGP1 homolog, RAB6A GEF complex partner 1	1.92172	0.821492	4.07184	0.0532634	1
223	ENSG00000143149	ALDH9A1	aldehyde dehydrogenase 9 family member A1	-0.686689	4.64887	4.06677	0.0534022	1
51611	ENSG00000117543	DPH5	diphthamide biosynthesis 5	0.964265	3.51167	4.06672	0.0534037	1
51442	ENSG00000102243	VGLL1	vestigial like family member 1	0.542107	7.78406	4.06538	0.0534403	1
148268	ENSG00000171827	ZNF570	zinc finger protein 570	-3.30654	0.993699	4.12515	0.0534476	1
23197	ENSG00000113194	FAF2	Fas associated factor family member 2	0.532245	5.4099	4.06495	0.0534523	1
1854	ENSG00000128951	DUT	deoxyuridine triphosphatase	-0.596039	5.21816	4.06358	0.0534899	1
100130301	ENSG00000274443	C8orf89	chromosome 8 open reading frame 89	1.45182	2.05996	4.06008	0.0535862	1
54457	ENSG00000102387	TAF7L	TATA-box binding protein associated factor 7 like	-3.64142	1.07791	4.11322	0.0537678	1
5610	ENSG00000055332	EIF2AK2	eukaryotic translation initiation factor 2 alpha kinase 2	-0.551607	5.51855	4.05224	0.0538027	1
123591	ENSG00000169758	TMEM266	transmembrane protein 266	-2.69133	0.821312	4.10542	0.0539785	1
389033	ENSG00000291116	PLAC9P1	placenta associated 9 pseudogene 1	-3.59593	1.0857	4.1054	0.0539791	1
1360	ENSG00000153002	CPB1	carboxypeptidase B1	-3.59593	1.0857	4.1054	0.0539791	1
29121	ENSG00000069493	CLEC2D	C-type lectin domain family 2 member D	0.513391	6.37563	4.04495	0.0540048	1
4166	ENSG00000183196	CHST6	carbohydrate sulfotransferase 6	-2.68525	0.819932	4.09878	0.0541587	1
374887	ENSG00000250067	YJEFN3	YjeF N-terminal domain containing 3	-2.2761	1.28875	4.03936	0.0541604	1
143689	ENSG00000134627	PIWIL4	piwi like RNA-mediated gene silencing 4	-3.00413	0.893052	4.09864	0.0541625	1
1852	ENSG00000130829	DUSP9	dual specificity phosphatase 9	-0.612965	5.72177	4.03918	0.0541653	1
389634	ENSG00000226091	LINC00937	long intergenic non-protein coding RNA 937	-2.72231	0.827848	4.09408	0.0542865	1
727677	ENSG00000246228	CASC8	cancer susceptibility 8	2.17734	0.855264	4.03429	0.054302	1
10670	ENSG00000155876	RRAGA	Ras related GTP binding A	-0.536334	5.35566	4.03146	0.054381	1
8111	ENSG00000119714	GPR68	G protein-coupled receptor 68	-1.33056	2.63296	4.02544	0.05455	1
100861550	NA	PLUT	PDX1 associated lncRNA, upregulator of transcription	-0.7184	3.94626	4.02506	0.0545607	1
80108	ENSG00000198939	ZFP2	ZFP2 zinc finger protein	-1.64274	1.87933	4.02488	0.0545657	1
90233	ENSG00000204519	ZNF551	zinc finger protein 551	1.623	1.44485	4.02162	0.0546574	1
27039	ENSG00000078795	PKD2L2	polycystin 2 like 2, transient receptor potential cation channel	-2.7389	0.831215	4.07932	0.0546903	1
157310	ENSG00000134020	PEBP4	phosphatidylethanolamine binding protein 4	-2.72599	0.828378	4.07494	0.0548107	1
55328	ENSG00000184719	RNLS	renalase, FAD dependent amine oxidase	-2.0827	1.57569	4.01453	0.0548573	1
101929059	ENSG00000286125	ZIM2-AS1	ZIM2 antisense RNA 1	-1.39961	2.04214	4.01453	0.0548574	1
513	ENSG00000099624	ATP5F1D	ATP synthase F1 subunit delta	-0.927697	3.78807	4.01254	0.0549136	1
55226	ENSG00000135372	NAT10	N-acetyltransferase 10	0.72021	4.46429	4.01139	0.0549464	1
351	ENSG00000142192	APP	amyloid beta precursor protein	-0.537841	6.96418	4.01026	0.0549784	1
3680	ENSG00000144668	ITGA9	integrin subunit alpha 9	-2.7559	0.834716	4.06875	0.0549815	1
6627	ENSG00000131876	SNRPA1	small nuclear ribonucleoprotein polypeptide A'	-0.745356	4.34679	4.00762	0.0550532	1
644100	ENSG00000268223	ARL14EPL	ADP ribosylation factor like GTPase 14 effector protein like	-2.76265	0.836088	4.06339	0.0551297	1
6301	ENSG00000031698	SARS1	seryl-tRNA synthetase 1	0.511028	6.86543	4.00334	0.055175	1
3751	ENSG00000184408	KCND2	potassium voltage-gated channel subfamily D member 2	2.13525	0.73457	4.00296	0.0551858	1
4998	ENSG00000085840	ORC1	origin recognition complex subunit 1	-2.28144	1.66912	3.9991	0.0552957	1
1490	ENSG00000118523	CCN2	cellular communication network factor 2	-1.06557	5.3785	3.99852	0.0553123	1
23324	ENSG00000013288	MAN2B2	mannosidase alpha class 2B member 2	-1.15967	2.88762	3.99824	0.0553201	1
1295	ENSG00000144810	COL8A1	collagen type VIII alpha 1 chain	-2.14724	1.23293	3.99429	0.055433	1
4712	ENSG00000165264	NDUFB6	NADH:ubiquinone oxidoreductase subunit B6	0.569225	7.45976	3.99375	0.0554485	1
9708	ENSG00000253767	PCDHGA8	protocadherin gamma subfamily A, 8	-2.77288	0.838067	4.04934	0.0555209	1
148696	NA	LOC148696	uncharacterized LOC148696	1.77245	1.23281	3.99104	0.0555263	1
339175	ENSG00000087995	METTL2A	methyltransferase 2A, tRNA N3-cytidine	0.715057	4.67533	3.98523	0.055693	1
221143	ENSG00000150456	EEF1AKMT1	EEF1A lysine methyltransferase 1	0.792002	3.84995	3.98183	0.0557908	1
79669	ENSG00000114529	C3orf52	chromosome 3 open reading frame 52	1.1176	2.6953	3.9799	0.0558466	1
572558	ENSG00000224958	PGM5-AS1	PGM5 antisense RNA 1	-2.79245	0.842053	4.03598	0.0558954	1
105377368	NA	NA	NA	2.17619	0.742291	3.97536	0.0559777	1
6345	ENSG00000185739	SRL	sarcalumenin	-2.77563	0.838384	4.03305	0.0559782	1
27018	ENSG00000166681	BEX3	brain expressed X-linked 3	-0.863692	6.86823	3.97441	0.0560053	1
101929331	NA	LINC02975	long intergenic non-protein coding RNA 2975	1.34743	2.07384	3.97351	0.0560312	1
56681	ENSG00000079332	SAR1A	secretion associated Ras related GTPase 1A	-0.528854	7.53434	3.97292	0.0560483	1
56006	ENSG00000105771	SMG9	SMG9 nonsense mediated mRNA decay factor	0.799155	3.69769	3.9721	0.056072	1
7873	ENSG00000145050	MANF	mesencephalic astrocyte derived neurotrophic factor	-0.632688	4.98411	3.97098	0.0561046	1
84624	ENSG00000164694	FNDC1	fibronectin type III domain containing 1	-3.15463	0.933211	4.02628	0.0561695	1
84747	ENSG00000175970	UNC119B	unc-119 lipid binding chaperone B	-1.71547	1.85041	3.9682	0.0561853	1
10884	ENSG00000112996	MRPS30	mitochondrial ribosomal protein S30	-0.999612	3.245	3.96524	0.0562712	1
8578	ENSG00000074660	SCARF1	scavenger receptor class F member 1	-1.76328	1.76362	3.96475	0.0562854	1
143458	ENSG00000179241	LDLRAD3	low density lipoprotein receptor class A domain containing 3	-3.18288	0.949201	4.02157	0.0563031	1
5786	ENSG00000132670	PTPRA	protein tyrosine phosphatase receptor type A	-0.602832	4.47768	3.96222	0.0563594	1
55366	ENSG00000205213	LGR4	leucine rich repeat containing G protein-coupled receptor 4	-0.558122	6.11582	3.95939	0.0564417	1
58475	ENSG00000166927	MS4A7	membrane spanning 4-domains A7	0.559742	5.63822	3.95911	0.0564501	1
149428	ENSG00000163141	BNIPL	BCL2 interacting protein like	-1.91393	1.43565	3.9551	0.0565672	1
407008	ENSG00000284567	MIR223	microRNA 223	1.86562	0.912816	3.95417	0.0565944	1
6155	ENSG00000131469	RPL27	ribosomal protein L27	0.59589	9.42546	3.95415	0.0565951	1
91768	ENSG00000134508	CABLES1	Cdk5 and Abl enzyme substrate 1	0.743292	3.45352	3.95369	0.0566084	1
23741	ENSG00000255302	EID1	EP300 interacting inhibitor of differentiation 1	-0.591044	5.79364	3.94775	0.0567828	1
144983	ENSG00000139675	HNRNPA1L2	heterogeneous nuclear ribonucleoprotein A1 like 2	0.497406	7.09126	3.9468	0.0568108	1
55259	ENSG00000118307	DNAI7	dynein axonemal intermediate chain 7	-3.14957	0.947995	4.00331	0.0568241	1
1026	ENSG00000124762	CDKN1A	cyclin dependent kinase inhibitor 1A	-0.650691	6.58618	3.9423	0.0569433	1
56261	ENSG00000125772	GPCPD1	glycerophosphocholine phosphodiesterase 1	-0.727593	4.14465	3.93701	0.0570994	1
54969	ENSG00000056050	HPF1	histone PARylation factor 1	-0.752649	3.74615	3.93667	0.0571095	1
51314	ENSG00000086288	NME8	NME/NM23 family member 8	-3.15088	0.933481	3.99015	0.0572028	1
10456	ENSG00000143575	HAX1	HCLS1 associated protein X-1	0.585124	4.31089	3.93287	0.0572221	1
100500917	ENSG00000265462	MIR3680-1	microRNA 3680-1	-2.51838	0.782648	4.25287	0.0572679	1
100847041	ENSG00000266758	MIR3680-2	microRNA 3680-2	-2.51838	0.782648	4.25287	0.0572679	1
27123	ENSG00000155011	DKK2	dickkopf WNT signaling pathway inhibitor 2	-2.54355	0.787432	4.20137	0.0572679	1
692196	NA	SNORD76	small nucleolar RNA, C/D box 76	-2.55478	0.789731	4.20483	0.0572679	1
54923	ENSG00000203896	LIME1	Lck interacting transmembrane adaptor 1	-2.56381	0.791504	4.19616	0.0572679	1
84915	ENSG00000139438	FAM222A	family with sequence similarity 222 member A	-2.58088	0.794801	4.17333	0.0572679	1
24142	ENSG00000243477	NAA80	N-alpha-acetyltransferase 80, NatH catalytic subunit	-2.58109	0.794756	4.64369	0.0572679	1
100131193	ENSG00000228544	CCDC183-AS1	CCDC183 antisense RNA 1	-2.61763	0.801848	4.12427	0.0572679	1
9495	ENSG00000179841	AKAP5	A-kinase anchoring protein 5	-2.62234	0.80269	4.11112	0.0572679	1
8601	ENSG00000147509	RGS20	regulator of G protein signaling 20	-2.63214	0.804591	4.10264	0.0572679	1
23366	ENSG00000164542	MATCAP2	microtubule associated tyrosine carboxypeptidase 2	-2.62879	0.803476	4.47102	0.0572679	1
152756	ENSG00000250486	FAM218A	family with sequence similarity 218 member A	-2.65489	0.808481	4.00895	0.0572679	1
6554	ENSG00000100652	SLC10A1	solute carrier family 10 member 1	-2.6676	0.810897	3.99755	0.0572679	1
342510	ENSG00000186407	CD300E	CD300e molecule	-2.67433	0.817753	3.98703	0.0572933	1
145567	ENSG00000165914	TTC7B	tetratricopeptide repeat domain 7B	-0.639797	4.45912	3.9278	0.0573726	1
51335	ENSG00000182768	NGRN	neugrin, neurite outgrowth associated	-0.544806	5.46064	3.92338	0.0575042	1
51024	ENSG00000214253	FIS1	fission, mitochondrial 1	0.575552	7.73247	3.92338	0.0575043	1
100131801	ENSG00000229833	PET100	PET100 cytochrome c oxidase chaperone	0.649292	4.27064	3.92238	0.0575339	1
100337591	ENSG00000206869	SNORA70F	small nucleolar RNA, H/ACA box 70F	1.61603	1.44512	3.92146	0.0575613	1
493900	ENSG00000254860	TMEM9B-AS1	TMEM9B antisense RNA 1	-2.67466	0.817717	3.9774	0.0575728	1
5689	ENSG00000008018	PSMB1	proteasome 20S subunit beta 1	0.651495	9.33884	3.91948	0.0576205	1
374907	ENSG00000177191	B3GNT8	UDP-GlcNAc:betaGal beta-1,3-N-acetylglucosaminyltransferase 8	-2.71645	0.826619	3.97369	0.057681	1
10272	ENSG00000070404	FSTL3	follistatin like 3	1.0645	5.06106	3.91688	0.0576983	1
3981	ENSG00000174405	LIG4	DNA ligase 4	0.993406	2.68794	3.91641	0.0577123	1
222642	ENSG00000112212	TSPO2	translocator protein 2	2.11168	0.946358	3.91395	0.0577861	1
80818	ENSG00000125945	ZNF436	zinc finger protein 436	-1.21938	2.38742	3.91309	0.0578119	1
10724	ENSG00000198408	OGA	O-GlcNAcase	-0.585928	5.38035	3.90761	0.0579764	1
9522	ENSG00000085365	SCAMP1	secretory carrier membrane protein 1	0.755459	3.5657	3.90316	0.0581104	1
93663	ENSG00000146376	ARHGAP18	Rho GTPase activating protein 18	0.556662	5.64126	3.90307	0.0581133	1
51001	ENSG00000156469	MTERF3	mitochondrial transcription termination factor 3	-0.806336	3.43855	3.90136	0.0581648	1
80777	ENSG00000103018	CYB5B	cytochrome b5 type B	0.625886	4.94839	3.90102	0.0581752	1
27443	ENSG00000099954	CECR2	CECR2 histone acetyl-lysine reader	0.671996	4.42952	3.89908	0.0582337	1
539	ENSG00000241837	ATP5PO	ATP synthase peripheral stalk subunit OSCP	0.523487	6.75273	3.89667	0.0583067	1
92	ENSG00000121989	ACVR2A	activin A receptor type 2A	1.18557	3.148	3.89665	0.0583072	1
9958	ENSG00000135655	USP15	ubiquitin specific peptidase 15	0.477274	6.68628	3.89021	0.0585028	1
522	ENSG00000154723	ATP5PF	ATP synthase peripheral stalk subunit F6	0.55507	8.3414	3.8864	0.0586185	1
728689	ENSG00000205609	EIF3CL	eukaryotic translation initiation factor 3 subunit C like	-0.672429	6.31595	3.88292	0.0587245	1
55035	ENSG00000198000	NOL8	nucleolar protein 8	0.635158	4.53347	3.87512	0.0589632	1
23345	ENSG00000131018	SYNE1	spectrin repeat containing nuclear envelope protein 1	0.97986	3.30113	3.8739	0.0590007	1
6491	ENSG00000123473	STIL	STIL centriolar assembly protein	-1.90496	1.80062	3.86804	0.0591809	1
441208	NA	ZNRF2P1	zinc and ring finger 2 pseudogene 1	-1.07913	2.49917	3.86662	0.0592245	1
9087	ENSG00000154620	TMSB4Y	thymosin beta 4 Y-linked	-2.79401	0.842373	3.92149	0.0592269	1
79586	ENSG00000123989	CHPF	chondroitin polymerizing factor	-0.523883	7.07567	3.86648	0.0592289	1
138199	ENSG00000156017	CARNMT1	carnosine N-methyltransferase 1	-1.03606	2.67344	3.86396	0.0593066	1
3122	ENSG00000204287	HLA-DRA	major histocompatibility complex, class II, DR alpha	0.606656	4.54589	3.86041	0.0594163	1
79078	ENSG00000164008	C1orf50	chromosome 1 open reading frame 50	-1.60112	1.99435	3.86019	0.0594231	1
440585	ENSG00000186973	CFAP144	cilia and flagella associated protein 144	1.78042	1.54774	3.85804	0.0594895	1
2619	ENSG00000180447	GAS1	growth arrest specific 1	-1.35672	2.21897	3.85545	0.05957	1
658	ENSG00000138696	BMPR1B	bone morphogenetic protein receptor type 1B	-3.75467	1.07035	3.90742	0.0596517	1
8939	ENSG00000107164	FUBP3	far upstream element binding protein 3	-0.702003	4.32756	3.85075	0.0597159	1
284408	ENSG00000267254	ZNF790-AS1	ZNF790 antisense RNA 1	-2.07345	1.23219	3.8498	0.0597453	1
10003	ENSG00000077616	NAALAD2	N-acetylated alpha-linked acidic dipeptidase 2	-1.14404	3.15811	3.84945	0.0597562	1
4361	ENSG00000020922	MRE11	MRE11 homolog, double strand break repair nuclease	1.06157	3.09865	3.84882	0.0597759	1
5250	ENSG00000075415	SLC25A3	solute carrier family 25 member 3	-0.509632	6.41007	3.84842	0.0597885	1
116933	NA	CLRN1-AS1	CLRN1 antisense RNA 1	1.67793	1.33829	3.84427	0.0599176	1
23184	ENSG00000117899	MESD	mesoderm development LRP chaperone	-0.655763	6.91833	3.8441	0.0599231	1
29990	ENSG00000121716	PILRB	paired immunoglobin like type 2 receptor beta	1.89713	1.19584	3.84322	0.0599504	1
23091	ENSG00000123200	ZC3H13	zinc finger CCCH-type containing 13	0.480052	6.83222	3.84234	0.059978	1
1358	ENSG00000158516	CPA2	carboxypeptidase A2	-3.39835	1.01772	3.89625	0.0599913	1
101928632	NA	NA	NA	1.99616	0.847536	3.8401	0.0600482	1
80013	ENSG00000148481	MINDY3	MINDY lysine 48 deubiquitinase 3	0.653537	5.38555	3.83984	0.0600563	1
1875	ENSG00000133740	E2F5	E2F transcription factor 5	1.94975	0.819407	3.83976	0.0600587	1
824	ENSG00000162909	CAPN2	calpain 2	-1.04686	3.60019	3.83811	0.0601105	1
64802	ENSG00000173614	NMNAT1	nicotinamide nucleotide adenylyltransferase 1	0.767336	3.29922	3.83668	0.0601554	1
9051	ENSG00000140368	PSTPIP1	proline-serine-threonine phosphatase interacting protein 1	-3.57527	1.0933	3.89037	0.060171	1
23395	ENSG00000011376	LARS2	leucyl-tRNA synthetase 2, mitochondrial	1.06485	2.48352	3.83045	0.0603508	1
9414	ENSG00000119139	TJP2	tight junction protein 2	0.575689	5.74952	3.83028	0.0603564	1
2086	ENSG00000213462	ERV3-1	endogenous retrovirus group 3 member 1, envelope	0.743229	4.80584	3.83013	0.0603611	1
5685	ENSG00000041357	PSMA4	proteasome 20S subunit alpha 4	0.516834	8.53612	3.82853	0.0604115	1
8612	ENSG00000141934	PLPP2	phospholipid phosphatase 2	-1.38751	3.31819	3.82804	0.0604269	1
5558	ENSG00000146143	PRIM2	DNA primase subunit 2	1.1752	2.91838	3.82759	0.0604411	1
7569	ENSG00000147118	ZNF182	zinc finger protein 182	-1.22569	2.57218	3.82634	0.0604806	1
55353	ENSG00000104341	LAPTM4B	lysosomal protein transmembrane 4 beta	-0.66072	4.93001	3.82552	0.0605063	1
5494	ENSG00000100614	PPM1A	protein phosphatase, Mg2+/Mn2+ dependent 1A	-0.469601	6.12224	3.8234	0.0605732	1
125144	ENSG00000175061	SNHG29	small nucleolar RNA host gene 29	0.595434	7.46364	3.82102	0.0606485	1
25858	ENSG00000219435	CATSPERZ	catsper channel auxiliary subunit zeta	-3.19177	0.951342	3.8723	0.0607268	1
4685	ENSG00000154654	NCAM2	neural cell adhesion molecule 2	-3.05402	0.911799	3.86974	0.0608061	1
23098	ENSG00000004139	SARM1	sterile alpha and TIR motif containing 1	2.1175	0.841378	3.81522	0.0608324	1
26098	ENSG00000107938	EDRF1	erythroid differentiation regulatory factor 1	-1.4213	2.26618	3.80767	0.0610729	1
695	ENSG00000010671	BTK	Bruton tyrosine kinase	1.79891	0.909661	3.80382	0.0611958	1
9122	ENSG00000168679	SLC16A4	solute carrier family 16 member 4	0.699984	7.81202	3.80256	0.0612361	1
120406	ENSG00000204361	NXPE2	neurexophilin and PC-esterase domain family member 2	-2.83773	0.857597	3.85503	0.0612638	1
6636	ENSG00000139343	SNRPF	small nuclear ribonucleoprotein polypeptide F	0.538925	7.32909	3.80022	0.0613109	1
23212	ENSG00000179041	RRS1	ribosome biogenesis regulator 1 homolog	-1.18507	2.45528	3.80002	0.0613174	1
26778	ENSG00000207165	SNORA70	small nucleolar RNA, H/ACA box 70	-2.96665	0.884851	3.85285	0.0613318	1
10057	ENSG00000114770	ABCC5	ATP binding cassette subfamily C member 5	1.30362	1.8946	3.79564	0.0614578	1
9727	ENSG00000090565	RAB11FIP3	RAB11 family interacting protein 3	-2.2643	1.24161	3.79484	0.0614837	1
2568	ENSG00000094755	GABRP	gamma-aminobutyric acid type A receptor subunit pi	-3.42014	1.00354	3.84536	0.0615664	1
155066	ENSG00000171130	ATP6V0E2	ATPase H+ transporting V0 subunit e2	-1.95916	1.54329	3.7914	0.0615943	1
267020	ENSG00000249222	ATP5MGL	ATP synthase membrane subunit g like	0.537579	7.34932	3.79097	0.061608	1
285671	ENSG00000164197	RNF180	ring finger protein 180	-2.5138	0.781759	3.836	0.0618614	1
94005	ENSG00000087111	PIGS	phosphatidylinositol glycan anchor biosynthesis class S	-0.685764	3.92565	3.78127	0.0619216	1
401207	ENSG00000164241	C5orf63	chromosome 5 open reading frame 63	1.09971	2.88714	3.77944	0.0619808	1
7226	ENSG00000142185	TRPM2	transient receptor potential cation channel subfamily M member 2	1.96437	0.826955	3.77664	0.0620716	1
4719	ENSG00000023228	NDUFS1	NADH:ubiquinone oxidoreductase core subunit S1	0.574915	6.17313	3.77556	0.0621067	1
101928429	NA	MAP3K5-AS2	MAP3K5 antisense RNA 2	-2.86228	0.855292	3.82712	0.0621425	1
79858	ENSG00000114670	NEK11	NIMA related kinase 11	1.10103	3.32575	3.77274	0.0621985	1
169355	ENSG00000188676	IDO2	indoleamine 2,3-dioxygenase 2	1.76008	1.47214	3.77207	0.0622202	1
23279	ENSG00000030066	NUP160	nucleoporin 160	0.606256	5.09145	3.7632	0.0625101	1
9322	ENSG00000125733	TRIP10	thyroid hormone receptor interactor 10	0.759732	4.29549	3.76302	0.0625159	1
3603	ENSG00000172349	IL16	interleukin 16	1.47542	1.70672	3.76261	0.0625293	1
10188	ENSG00000061938	TNK2	tyrosine kinase non receptor 2	-1.50593	2.05444	3.75866	0.0626587	1
25841	ENSG00000166016	ABTB2	ankyrin repeat and BTB domain containing 2	-2.02265	1.19938	3.75802	0.0626799	1
160364	ENSG00000172322	CLEC12A	C-type lectin domain family 12 member A	1.41133	1.76543	3.75642	0.0627324	1
8638	ENSG00000135114	OASL	2'-5'-oligoadenylate synthetase like	2.03954	1.25362	3.754	0.0628121	1
54921	ENSG00000168802	CHTF8	chromosome transmission fidelity factor 8	-0.659326	3.84823	3.7499	0.0629471	1
3972	ENSG00000104826	LHB	luteinizing hormone subunit beta	-1.33691	2.74101	3.74866	0.062988	1
56478	ENSG00000184708	EIF4ENIF1	eukaryotic translation initiation factor 4E nuclear import factor 1	-0.746084	3.53032	3.74861	0.0629899	1
366	ENSG00000103569	AQP9	aquaporin 9	1.88598	1.13256	3.74761	0.0630226	1
221442	ENSG00000290554	ADCY10P1	ADCY10 pseudogene 1	-2.56541	0.791858	3.79799	0.0630753	1
51166	ENSG00000109576	AADAT	aminoadipate aminotransferase	-2.55072	0.788876	3.79608	0.0631369	1
55127	ENSG00000119285	HEATR1	HEAT repeat containing 1	1.08283	2.77919	3.74293	0.0631775	1
2116	ENSG00000105672	ETV2	ETS variant transcription factor 2	-2.55035	0.788795	3.7939	0.0632073	1
219285	ENSG00000177409	SAMD9L	sterile alpha motif domain containing 9 like	1.13045	2.4669	3.74148	0.0632256	1
10728	ENSG00000110958	PTGES3	prostaglandin E synthase 3	-0.521923	6.55481	3.74137	0.0632295	1
4729	ENSG00000178127	NDUFV2	NADH:ubiquinone oxidoreductase core subunit V2	-0.660211	5.08533	3.74072	0.0632509	1
6838	ENSG00000148296	SURF6	surfeit 6	-0.803072	3.55163	3.74009	0.0632718	1
101927560	ENSG00000233008	LOC101927560	uncharacterized LOC101927560	-3.00684	0.882259	3.79168	0.0632793	1
102724297	NA	CCR5AS	CCR5 antisense RNA	-2.54181	0.787055	3.79131	0.0632914	1
55561	ENSG00000171219	CDC42BPG	CDC42 binding protein kinase gamma	0.83839	3.19604	3.73647	0.0633921	1
8663	ENSG00000184110	EIF3C	eukaryotic translation initiation factor 3 subunit C	-0.659333	6.3149	3.73426	0.0634658	1
2079	ENSG00000100632	ERH	ERH mRNA splicing and mitosis factor	0.533877	7.41098	3.73379	0.0634813	1
100996274	NA	NA	NA	1.23648	1.96412	3.73198	0.0635415	1
5573	ENSG00000108946	PRKAR1A	protein kinase cAMP-dependent type I regulatory subunit alpha	-0.471396	6.18447	3.73166	0.0635524	1
57549	ENSG00000085552	IGSF9	immunoglobulin superfamily member 9	-2.10941	1.23203	3.7308	0.0635811	1
4693	ENSG00000124479	NDP	norrin cystine knot growth factor NDP	-3.58964	1.084	3.78211	0.0635904	1
347240	ENSG00000186638	KIF24	kinesin family member 24	1.84986	0.899849	3.73041	0.0635939	1
387338	ENSG00000117481	NSUN4	NOP2/Sun RNA methyltransferase 4	0.775388	3.65526	3.72886	0.0636458	1
8864	ENSG00000132326	PER2	period circadian regulator 2	0.793564	3.68065	3.72867	0.0636522	1
79656	ENSG00000162373	BEND5	BEN domain containing 5	1.84631	1.00925	3.72839	0.0636615	1
56834	ENSG00000173264	GPR137	G protein-coupled receptor 137	-0.830483	4.04881	3.72754	0.06369	1
56172	ENSG00000154122	ANKH	ANKH inorganic pyrophosphate transport regulator	-0.891261	3.18039	3.72639	0.0637283	1
11176	ENSG00000076108	BAZ2A	bromodomain adjacent to zinc finger domain 2A	0.590371	6.02825	3.72544	0.0637601	1
100379571	NA	BACE1-AS	BACE1 antisense RNA	-2.58606	0.795809	3.77665	0.0637685	1
1802	ENSG00000132768	DPH2	diphthamide biosynthesis 2	-1.64946	1.69074	3.71878	0.0639838	1
9865	ENSG00000255690	TRIL	TLR4 interactor with leucine rich repeats	-2.48139	0.775364	3.76958	0.0640003	1
1990	ENSG00000139610	CELA1	chymotrypsin like elastase 1	-3.12986	0.936629	3.76386	0.0641882	1
594839	ENSG00000200534	SNORA33	small nucleolar RNA, H/ACA box 33	-2.57955	0.794352	3.75955	0.0643304	1
221002	ENSG00000198915	RASGEF1A	RasGEF domain family member 1A	-2.50418	0.779868	3.75773	0.0643905	1
9720	ENSG00000170160	CCDC144A	coiled-coil domain containing 144A	1.07991	4.06444	3.70537	0.064436	1
101929768	NA	OSMR-DT	OSMR divergent transcript	1.76137	0.901776	3.70431	0.0644723	1
10845	ENSG00000166855	CLPX	caseinolytic mitochondrial matrix peptidase chaperone subunit X	-0.6161	4.51356	3.70222	0.0645431	1
392636	ENSG00000187546	AGMO	alkylglycerol monooxygenase	-2.69556	0.822203	3.75293	0.0645496	1
4756	ENSG00000067141	NEO1	neogenin 1	-1.78243	1.93703	3.70045	0.0646032	1
90488	ENSG00000151135	TMEM263	transmembrane protein 263	-0.545994	5.33046	3.69967	0.0646296	1
79029	ENSG00000171763	AFG2B	AFG2 AAA ATPase homolog B	-1.61159	1.97653	3.69955	0.0646338	1
389860	ENSG00000238269	PAGE2B	PAGE family member 2B	1.25581	2.70834	3.69947	0.0646363	1
9627	ENSG00000064692	SNCAIP	synuclein alpha interacting protein	-2.61303	0.800957	3.74955	0.0646615	1
5225	ENSG00000096088	PGC	progastricsin	-2.22476	1.22145	3.697	0.0647205	1
100505918	NA	LOC100505918	uncharacterized LOC100505918	-2.69255	0.821472	3.74659	0.06476	1
10847	ENSG00000080603	SRCAP	Snf2 related CREBBP activator protein	0.67646	3.5589	3.69503	0.0647877	1
85440	ENSG00000116641	DOCK7	dedicator of cytokinesis 7	-0.659575	4.02301	3.69123	0.0649172	1
10473	ENSG00000182952	HMGN4	high mobility group nucleosomal binding domain 4	-0.661363	4.22883	3.68833	0.0650165	1
316	ENSG00000138356	AOX1	aldehyde oxidase 1	1.24835	2.91155	3.68804	0.0650263	1
93974	ENSG00000130770	ATP5IF1	ATP synthase inhibitory factor subunit 1	-0.831774	6.14998	3.68693	0.0650645	1
60491	ENSG00000196290	NIF3L1	NGG1 interacting factor 3 like 1	0.570706	4.50346	3.68678	0.0650694	1
79845	ENSG00000133874	RNF122	ring finger protein 122	-2.5178	0.782445	3.737	0.0650801	1
9901	ENSG00000196220	SRGAP3	SLIT-ROBO Rho GTPase activating protein 3	1.53566	1.59868	3.68501	0.0651303	1
28970	ENSG00000182919	C11orf54	chromosome 11 open reading frame 54	0.631521	4.6981	3.68469	0.0651413	1
94107	ENSG00000187713	TMEM203	transmembrane protein 203	-0.789362	3.67576	3.68259	0.0652134	1
157574	ENSG00000214050	FBXO16	F-box protein 16	-2.77582	0.844017	3.73122	0.0652737	1
653269	ENSG00000196834	POTEI	POTE ankyrin domain family member I	1.05322	3.16015	3.68081	0.0652745	1
100130890	ENSG00000279170	TSTD3	thiosulfate sulfurtransferase like domain containing 3	-1.88712	1.41862	3.68026	0.0652935	1
54458	ENSG00000205352	PRR13	proline rich 13	-0.479108	6.96939	3.68013	0.0652978	1
254251	ENSG00000178177	LCORL	ligand dependent nuclear receptor corepressor like	0.849372	2.72013	3.67833	0.0653598	1
4345	ENSG00000091972	CD200	CD200 molecule	0.748798	7.33548	3.67791	0.0653743	1
26813	ENSG00000252542	SNORD36C	small nucleolar RNA, C/D box 36C	-2.64808	0.807736	3.72726	0.0654068	1
123346	ENSG00000175202	HIGD2B	HIG1 hypoxia inducible domain family member 2B	-2.55811	0.790461	3.72575	0.0654577	1
10142	ENSG00000127914	AKAP9	A-kinase anchoring protein 9	0.473783	7.99937	3.67222	0.0655706	1
54940	ENSG00000109180	OCIAD1	OCIA domain containing 1	0.587352	7.12919	3.67199	0.0655784	1
54778	ENSG00000157450	RNF111	ring finger protein 111	-0.630564	3.88621	3.66932	0.0656708	1
4502	ENSG00000125148	MT2A	metallothionein 2A	-0.808168	6.40391	3.66762	0.0657295	1
84186	ENSG00000147905	ZCCHC7	zinc finger CCHC-type containing 7	0.77596	3.22031	3.66668	0.0657623	1
201627	ENSG00000174839	DENND6A	DENN domain containing 6A	-0.843981	3.11495	3.6644	0.0658413	1
64130	ENSG00000104863	LIN7B	lin-7 homolog B, crumbs cell polarity complex component	-2.75584	0.834341	3.71292	0.0658912	1
4041	ENSG00000162337	LRP5	LDL receptor related protein 5	-1.16687	2.86993	3.6604	0.0659804	1
10961	ENSG00000089248	ERP29	endoplasmic reticulum protein 29	-0.597326	6.54691	3.65903	0.0660279	1
100126270	ENSG00000268066	FMR1-AS1	FMR1 antisense RNA 1	-2.55321	0.789308	3.70626	0.0661176	1
388650	ENSG00000154511	DIPK1A	divergent protein kinase domain 1A	0.719702	4.12893	3.65529	0.0661586	1
58191	ENSG00000161921	CXCL16	C-X-C motif chemokine ligand 16	1.51581	1.34923	3.65505	0.0661666	1
4736	ENSG00000198755	RPL10A	ribosomal protein L10a	-0.520886	6.34314	3.65282	0.0662446	1
4258	ENSG00000085871	MGST2	microsomal glutathione S-transferase 2	0.511943	6.46583	3.65159	0.0662877	1
4511	NA	TRNC	tRNA-Cys	-1.70609	1.6186	3.65042	0.0663285	1
390003	ENSG00000243316	GUCY2GP	guanylate cyclase 2G, pseudogene	2.02475	1.01616	3.64763	0.0664265	1
100506994	ENSG00000241472	PTPRG-AS1	PTPRG antisense RNA 1	-2.9524	0.882169	3.69714	0.0664293	1
5441	ENSG00000177700	POLR2L	RNA polymerase II, I and III subunit L	-1.28091	6.44646	3.64637	0.0664705	1
101930748	ENSG00000233780	LINC00367	long intergenic non-protein coding RNA 367	-2.58436	0.795433	3.6947	0.0665129	1
165631	ENSG00000173200	PARP15	poly(ADP-ribose) polymerase family member 15	-3.01698	0.896104	3.6944	0.066523	1
57047	ENSG00000163746	PLSCR2	phospholipid scramblase 2	-3.21764	0.933465	3.69391	0.0665399	1
57578	ENSG00000133958	UNC79	unc-79 homolog, NALCN channel complex subunit	-2.68028	0.819159	3.69384	0.0665422	1
26610	ENSG00000109911	ELP4	elongator acetyltransferase complex subunit 4	-1.08927	3.43306	3.64113	0.0666549	1
51762	ENSG00000166128	RAB8B	RAB8B, member RAS oncogene family	0.723439	3.88069	3.64014	0.0666895	1
2980	ENSG00000197273	GUCA2A	guanylate cyclase activator 2A	1.02037	4.28205	3.63998	0.0666951	1
100506963	ENSG00000236810	ELOA-AS1	ELOA antisense RNA 1	1.94609	1.3133	3.63782	0.0667714	1
120224	ENSG00000151715	TMEM45B	transmembrane protein 45B	-1.69608	1.61413	3.63719	0.0667937	1
57473	ENSG00000196700	ZNF512B	zinc finger protein 512B	-2.26624	1.28613	3.63672	0.0668102	1
10957	ENSG00000146278	PNRC1	proline rich nuclear receptor coactivator 1	-0.477006	5.43223	3.63666	0.0668122	1
4292	ENSG00000076242	MLH1	mutL homolog 1	0.581023	4.09892	3.63251	0.0669588	1
8668	ENSG00000084623	EIF3I	eukaryotic translation initiation factor 3 subunit I	0.562382	6.17354	3.63021	0.0670402	1
284697	ENSG00000189195	BTBD8	BTB domain containing 8	-2.37768	1.34117	3.62863	0.0670965	1
132332	ENSG00000164112	SMIM43	small integral membrane protein 43	-0.942712	2.87817	3.6273	0.0671436	1
100506753	NA	MAILR	macrophage interferon regulatory lncRNA	-2.63667	0.805096	3.67598	0.0671586	1
116447	ENSG00000184428	TOP1MT	DNA topoisomerase I mitochondrial	1.7996	1.38145	3.62431	0.0672497	1
6093	ENSG00000067900	ROCK1	Rho associated coiled-coil containing protein kinase 1	-0.530981	6.3552	3.62338	0.0672829	1
6082	ENSG00000207280	SNORD20	small nucleolar RNA, C/D box 20	-2.64711	0.807118	3.67191	0.0672998	1
9652	ENSG00000198677	SKIC3	SKI3 subunit of superkiller complex	-0.607099	5.04728	3.62273	0.0673059	1
9453	ENSG00000152904	GGPS1	geranylgeranyl diphosphate synthase 1	0.742465	3.98326	3.6208	0.0673749	1
57862	ENSG00000119725	ZNF410	zinc finger protein 410	0.689892	4.38062	3.62019	0.0673965	1
63898	ENSG00000104611	SH2D4A	SH2 domain containing 4A	-0.599187	4.98581	3.61805	0.0674727	1
51371	ENSG00000132963	POMP	proteasome maturation protein	0.545196	9.44579	3.61213	0.0676843	1
139065	ENSG00000179542	SLITRK4	SLIT and NTRK like family member 4	-2.76193	0.83585	3.65809	0.0677819	1
8309	ENSG00000168306	ACOX2	acyl-CoA oxidase 2	-3.22998	0.960312	3.65805	0.0677834	1
5184	ENSG00000124299	PEPD	peptidase D	-0.825322	3.42073	3.60615	0.0678988	1
10039	ENSG00000041880	PARP3	poly(ADP-ribose) polymerase family member 3	-2.67374	0.817697	3.65473	0.0679	1
4254	ENSG00000049130	KITLG	KIT ligand	1.4315	1.71803	3.60533	0.0679283	1
11230	ENSG00000243279	PRAF2	PRA1 domain family member 2	-0.96251	2.8299	3.60493	0.0679427	1
118429	ENSG00000163297	ANTXR2	ANTXR cell adhesion molecule 2	-0.642023	4.50649	3.60449	0.0679585	1
401152	ENSG00000164096	C4orf3	chromosome 4 open reading frame 3	0.473714	7.39996	3.60434	0.067964	1
2212	ENSG00000143226	FCGR2A	Fc gamma receptor IIa	0.559411	5.835	3.6007	0.068095	1
57522	ENSG00000196935	SRGAP1	SLIT-ROBO Rho GTPase activating protein 1	-1.04799	3.21112	3.59907	0.068154	1
9686	ENSG00000144560	VGLL4	vestigial like family member 4	0.712333	3.83955	3.59804	0.0681913	1
2121	ENSG00000072840	EVC	EvC ciliary complex subunit 1	-3.14549	0.9404	3.64476	0.068251	1
100873933	ENSG00000235777	DPYD-AS2	DPYD antisense RNA 2	-2.68738	0.8204	3.64184	0.0683542	1
85015	ENSG00000123552	USP45	ubiquitin specific peptidase 45	1.12757	3.27764	3.59282	0.0683798	1
7014	ENSG00000132604	TERF2	telomeric repeat binding factor 2	-1.12576	2.66459	3.59086	0.0684512	1
4848	ENSG00000111596	CNOT2	CCR4-NOT transcription complex subunit 2	0.677404	6.07958	3.58873	0.0685282	1
537	ENSG00000071553	ATP6AP1	ATPase H+ transporting accessory protein 1	-0.607122	6.56489	3.58759	0.0685697	1
6902	ENSG00000171530	TBCA	tubulin folding cofactor A	-0.463467	6.73497	3.58549	0.068646	1
5733	ENSG00000050628	PTGER3	prostaglandin E receptor 3	-2.7422	0.83181	3.63166	0.0687156	1
9246	ENSG00000156587	UBE2L6	ubiquitin conjugating enzyme E2 L6	0.654674	4.61769	3.58243	0.0687575	1
219539	ENSG00000166793	YPEL4	yippee like 4	-2.82	0.847481	3.62891	0.0688134	1
64901	ENSG00000204764	RANBP17	RAN binding protein 17	1.27922	2.48508	3.58068	0.0688215	1
6992	ENSG00000204619	PPP1R11	protein phosphatase 1 regulatory inhibitor subunit 11	0.980621	3.19109	3.57736	0.0689426	1
8796	ENSG00000136155	SCEL	sciellin	-3.0233	0.91116	3.62495	0.0689546	1
5125	ENSG00000099139	PCSK5	proprotein convertase subtilisin/kexin type 5	-1.15014	2.86517	3.57572	0.0690025	1
1871	ENSG00000112242	E2F3	E2F transcription factor 3	-1.5593	1.97025	3.57262	0.0691164	1
25946	ENSG00000161642	ZNF385A	zinc finger protein 385A	-0.756793	3.78484	3.57091	0.0691789	1
2242	ENSG00000182511	FES	FES proto-oncogene, tyrosine kinase	-1.35919	1.9257	3.56934	0.0692368	1
767564	ENSG00000201672	SNORD113-4	small nucleolar RNA, C/D box 113-4	-2.79608	0.842839	3.61677	0.0692479	1
84690	ENSG00000141255	SPATA22	spermatogenesis associated 22	1.91896	1.13379	3.56836	0.0692726	1
6402	ENSG00000188404	SELL	selectin L	1.57369	2.52907	3.56576	0.0693681	1
285286	ENSG00000241163	LINC00877	long intergenic non-protein coding RNA 877	1.73284	1.14055	3.56442	0.0694177	1
79035	ENSG00000139579	NABP2	nucleic acid binding protein 2	-1.5718	1.98788	3.56381	0.0694402	1
64425	ENSG00000137054	POLR1E	RNA polymerase I subunit E	-1.19568	3.10179	3.56099	0.069544	1
2483	ENSG00000109536	FRG1	FSHD region gene 1	0.434697	6.20438	3.55988	0.0695852	1
3429	ENSG00000165949	IFI27	interferon alpha inducible protein 27	0.59863	7.36189	3.55941	0.0696026	1
163126	ENSG00000176396	EID2	EP300 interacting inhibitor of differentiation 2	-0.598526	4.39937	3.55614	0.0697235	1
51128	ENSG00000152700	SAR1B	secretion associated Ras related GTPase 1B	0.576461	5.75309	3.55251	0.069858	1
55295	ENSG00000167487	KLHL26	kelch like family member 26	-2.64653	0.807	3.59976	0.0698615	1
254128	ENSG00000236859	NIFK-AS1	NIFK antisense RNA 1	1.19951	2.09629	3.55174	0.0698867	1
6206	ENSG00000112306	RPS12	ribosomal protein S12	-0.50714	6.92278	3.55028	0.069941	1
408	ENSG00000137486	ARRB1	arrestin beta 1	0.581679	4.5356	3.54422	0.0701666	1
50861	ENSG00000197457	STMN3	stathmin 3	-0.629881	4.39489	3.54366	0.0701874	1
100421746	ENSG00000290748	LOC100421746	PAGE family member 5 pseudogene	1.92605	1.11295	3.54296	0.0702137	1
349114	NA	LINC00265	long intergenic non-protein coding RNA 265	-1.41015	2.19857	3.5425	0.0702308	1
60495	ENSG00000172987	HPSE2	heparanase 2 (inactive)	-3.43508	1.02708	3.5894	0.0702385	1
23590	ENSG00000148459	PDSS1	decaprenyl diphosphate synthase subunit 1	-2.83277	0.849591	3.58875	0.0702623	1
6165	ENSG00000182899	RPL35A	ribosomal protein L35a	0.554068	9.47837	3.54065	0.0703	1
54101	ENSG00000183421	RIPK4	receptor interacting serine/threonine kinase 4	-1.64712	1.8277	3.53856	0.0703779	1
388585	ENSG00000197921	HES5	hes family bHLH transcription factor 5	-2.6584	0.809133	3.58362	0.0704497	1
6156	ENSG00000156482	RPL30	ribosomal protein L30	0.58329	9.83231	3.53582	0.0704807	1
92922	ENSG00000135736	CCDC102A	coiled-coil domain containing 102A	-1.96758	1.51449	3.53378	0.0705572	1
9662	ENSG00000174799	CEP135	centrosomal protein 135	0.704982	3.77651	3.53186	0.0706291	1
83473	ENSG00000167216	KATNAL2	katanin catalytic subunit A1 like 2	-2.69889	0.817037	3.5784	0.0706411	1
2204	ENSG00000186431	FCAR	Fc alpha receptor	-2.69889	0.817037	3.5784	0.0706411	1
27156	ENSG00000100218	RSPH14	radial spoke head 14 homolog	-2.71302	0.819032	3.57764	0.0706694	1
4148	ENSG00000132031	MATN3	matrilin 3	-1.64585	1.99892	3.52949	0.0707186	1
55620	ENSG00000178078	STAP2	signal transducing adaptor family member 2	-1.59507	2.53142	3.52924	0.0707278	1
8449	ENSG00000204560	DHX16	DEAH-box helicase 16	1.16616	2.34349	3.5253	0.0708762	1
101928079	ENSG00000224081	SLC44A3-AS1	SLC44A3 antisense RNA 1	1.99554	0.826617	3.52112	0.0710341	1
929	ENSG00000170458	CD14	CD14 molecule	-0.679102	5.88706	3.52103	0.0710377	1
441873	ENSG00000229571	PRAMEF25	PRAME family member 25	-2.76779	0.829483	3.56663	0.0710753	1
645359	ENSG00000280267	PRAMEF26	PRAME family member 26	-2.76779	0.829483	3.56663	0.0710753	1
3015	ENSG00000164032	H2AZ1	H2A.Z variant histone 1	0.477888	6.78286	3.51728	0.0711797	1
149986	ENSG00000149657	LSM14B	LSM family member 14B	-0.772201	3.59707	3.51615	0.0712223	1
7022	ENSG00000087510	TFAP2C	transcription factor AP-2 gamma	-0.505945	7.03097	3.51466	0.0712791	1
6351	ENSG00000275302	CCL4	C-C motif chemokine ligand 4	1.5544	1.25285	3.50974	0.071466	1
728747	NA	ANKRD20A4P	ankyrin repeat domain 20 family member A4, pseudogene	1.15758	2.31461	3.50953	0.0714742	1
8452	ENSG00000036257	CUL3	cullin 3	-0.529479	5.46761	3.50912	0.0714898	1
51340	ENSG00000101343	CRNKL1	crooked neck pre-mRNA splicing factor 1	0.488801	5.5267	3.50906	0.0714921	1
121838	ENSG00000233725	NRAD1	non-coding RNA in the aldehyde dehydrogenase 1A pathway	-0.994804	3.52186	3.50869	0.0715059	1
5984	ENSG00000163918	RFC4	replication factor C subunit 4	0.756174	4.26624	3.5084	0.071517	1
26001	ENSG00000108523	RNF167	ring finger protein 167	-0.521194	5.60566	3.50797	0.0715335	1
84914	ENSG00000198466	ZNF587	zinc finger protein 587	0.704527	4.11222	3.50755	0.0715497	1
64949	ENSG00000125901	MRPS26	mitochondrial ribosomal protein S26	-0.734865	3.66146	3.50416	0.0716789	1
51659	ENSG00000131153	GINS2	GINS complex subunit 2	-1.07945	2.56336	3.50387	0.0716899	1
11342	ENSG00000082996	RNF13	ring finger protein 13	0.532331	6.19833	3.50176	0.0717708	1
4716	ENSG00000140990	NDUFB10	NADH:ubiquinone oxidoreductase subunit B10	-0.754669	4.87882	3.49765	0.071928	1
129303	ENSG00000168890	TMEM150A	transmembrane protein 150A	-0.633427	4.83705	3.49403	0.0720674	1
642987	ENSG00000186952	TMEM232	transmembrane protein 232	1.92633	0.835707	3.49301	0.0721064	1
60313	ENSG00000159592	GPBP1L1	GC-rich promoter binding protein 1 like 1	0.603699	4.44313	3.49286	0.0721123	1
9055	ENSG00000198901	PRC1	protein regulator of cytokinesis 1	0.733179	3.8816	3.49262	0.0721213	1
5538	ENSG00000131238	PPT1	palmitoyl-protein thioesterase 1	-0.550353	5.06198	3.48844	0.0722823	1
54918	ENSG00000091317	CMTM6	CKLF like MARVEL transmembrane domain containing 6	-0.505204	7.98617	3.48839	0.0722844	1
10261	ENSG00000140749	IGSF6	immunoglobulin superfamily member 6	0.741778	3.97039	3.48711	0.0723337	1
51327	ENSG00000169877	AHSP	alpha hemoglobin stabilizing protein	1.00958	4.04716	3.48419	0.0724467	1
167465	ENSG00000178175	ZNF366	zinc finger protein 366	-1.3011	2.10058	3.48348	0.072474	1
2206	ENSG00000149534	MS4A2	membrane spanning 4-domains A2	-2.73693	0.830849	3.52587	0.072601	1
113130	ENSG00000146670	CDCA5	cell division cycle associated 5	-1.33494	2.23523	3.47801	0.0726862	1
11156	ENSG00000184489	PTP4A3	protein tyrosine phosphatase 4A3	-2.75116	0.833745	3.52155	0.072765	1
55110	ENSG00000111196	MAGOHB	mago homolog B, exon junction complex subunit	0.588961	4.84325	3.47301	0.0728803	1
84190	ENSG00000127720	METTL25	methyltransferase like 25	-0.733249	3.4471	3.47198	0.0729204	1
199692	ENSG00000198551	ZNF627	zinc finger protein 627	-1.41285	1.69075	3.46837	0.0730612	1
9879	ENSG00000145833	DDX46	DEAD-box helicase 46	0.464277	7.68933	3.46744	0.0730978	1
121053	ENSG00000151131	NOPCHAP1	NOP protein chaperone 1	0.526167	5.17863	3.46725	0.0731052	1
84289	ENSG00000168395	ING5	inhibitor of growth family member 5	0.734512	4.03768	3.46671	0.0731261	1
23673	ENSG00000117758	STX12	syntaxin 12	0.518226	6.29958	3.46553	0.0731722	1
100129075	ENSG00000186615	KTN1-AS1	KTN1 antisense RNA 1	-3.04891	0.91084	3.5061	0.0733547	1
79937	ENSG00000106714	CNTNAP3	contactin associated protein family member 3	-2.02723	1.19304	3.46051	0.0733688	1
8321	ENSG00000157240	FZD1	frizzled class receptor 1	-0.724033	3.32654	3.45965	0.0734027	1
10636	ENSG00000169220	RGS14	regulator of G protein signaling 14	-1.87465	1.41584	3.45725	0.073497	1
445582	ENSG00000188219	POTEE	POTE ankyrin domain family member E	0.959453	3.30959	3.45641	0.0735301	1
91133	ENSG00000154655	L3MBTL4	L3MBTL histone methyl-lysine binding protein 4	-3.08264	0.909757	3.50066	0.0735637	1
100996634	NA	NA	NA	1.16058	2.65911	3.45353	0.0736434	1
84296	ENSG00000147536	GINS4	GINS complex subunit 4	1.34758	1.79682	3.4531	0.0736604	1
54981	ENSG00000106733	NMRK1	nicotinamide riboside kinase 1	-0.794413	4.14697	3.45309	0.0736607	1
9562	ENSG00000107789	MINPP1	multiple inositol-polyphosphate phosphatase 1	-0.557288	5.39523	3.45264	0.0736785	1
1006	ENSG00000150394	CDH8	cadherin 8	-2.95417	0.889339	3.49754	0.073684	1
5818	ENSG00000110400	NECTIN1	nectin cell adhesion molecule 1	-0.699706	4.04645	3.45241	0.0736874	1
51526	ENSG00000132823	OSER1	oxidative stress responsive serine rich 1	0.514509	6.04942	3.45143	0.0737261	1
100506144	ENSG00000243749	TMEM35B	transmembrane protein 35B	0.500011	5.55003	3.45125	0.0737333	1
100270746	NA	LARRPM	LINC00240 antisense RNA regulating promoter methylation	-2.49338	0.777734	3.49618	0.0737362	1
83719	ENSG00000090238	YPEL3	yippee like 3	-0.658956	4.01629	3.45032	0.07377	1
3029	ENSG00000063854	HAGH	hydroxyacylglutathione hydrolase	1.13386	2.32343	3.44994	0.0737851	1
29883	ENSG00000198791	CNOT7	CCR4-NOT transcription complex subunit 7	-0.53769	4.78649	3.44894	0.0738246	1
51250	ENSG00000130349	MTRES1	mitochondrial transcription rescue factor 1	0.727916	3.6258	3.44867	0.0738352	1
151556	ENSG00000163328	GPR155	G protein-coupled receptor 155	-1.0348	2.83746	3.44858	0.0738387	1
93649	ENSG00000141052	MYOCD	myocardin	-1.54989	1.82131	3.44806	0.0738592	1
27180	ENSG00000129450	SIGLEC9	sialic acid binding Ig like lectin 9	1.61103	1.43236	3.44509	0.0739766	1
6451	ENSG00000131171	SH3BGRL	SH3 domain binding glutamate rich protein like	0.571911	5.28238	3.44389	0.0740243	1
100505741	ENSG00000122432	SPATA1	spermatogenesis associated 1	1.8154	1.2178	3.44386	0.0740253	1
93349	ENSG00000185404	SP140L	SP140 nuclear body protein like	0.678493	3.9368	3.44379	0.0740284	1
101929222	ENSG00000261645	DISC1FP1	DISC1 fusion partner 1	-3.36065	1.00004	3.48361	0.0742231	1
55012	ENSG00000092020	PPP2R3C	protein phosphatase 2 regulatory subunit B''gamma	0.57352	5.02606	3.43857	0.0742353	1
388165	ENSG00000291027	UBE2Q2P1	UBE2Q2 pseudogene 1	1.26809	3.0086	3.43764	0.0742722	1
6633	ENSG00000125743	SNRPD2	small nuclear ribonucleoprotein D2 polypeptide	0.518703	7.29093	3.43546	0.074359	1
1104	ENSG00000180198	RCC1	regulator of chromosome condensation 1	0.726648	3.56861	3.43461	0.0743931	1
3400	ENSG00000172201	ID4	inhibitor of DNA binding 4	-1.16087	3.47026	3.43038	0.074562	1
6302	ENSG00000135452	TSPAN31	tetraspanin 31	0.837242	3.13405	3.42932	0.0746042	1
8394	ENSG00000143398	PIP5K1A	phosphatidylinositol-4-phosphate 5-kinase type 1 alpha	-0.540986	6.18608	3.42677	0.0747064	1
1052	ENSG00000221869	CEBPD	CCAAT enhancer binding protein delta	-0.482736	6.03082	3.42502	0.0747764	1
220002	ENSG00000162144	CYB561A3	cytochrome b561 family member A3	-0.621964	4.78689	3.42365	0.0748312	1
8395	ENSG00000107242	PIP5K1B	phosphatidylinositol-4-phosphate 5-kinase type 1 beta	-0.731231	4.17606	3.42068	0.0749504	1
83879	ENSG00000144354	CDCA7	cell division cycle associated 7	-1.74515	1.6906	3.42015	0.074972	1
7311	ENSG00000221983	UBA52	ubiquitin A-52 residue ribosomal protein fusion product 1	0.550226	9.24684	3.41803	0.0750572	1
6780	ENSG00000124214	STAU1	staufen double-stranded RNA binding protein 1	-0.520485	5.49858	3.41492	0.0751825	1
28513	ENSG00000071991	CDH19	cadherin 19	1.85704	1.01057	3.4147	0.0751915	1
51669	ENSG00000133872	SARAF	store-operated calcium entry associated regulatory factor	-0.50071	6.77499	3.4143	0.0752074	1
28755	ENSG00000277734	TRAC	T cell receptor alpha constant	-2.8504	0.860338	3.4562	0.0752973	1
7702	ENSG00000166478	ZNF143	zinc finger protein 143	0.866801	4.57621	3.41183	0.0753073	1
10213	ENSG00000115233	PSMD14	proteasome 26S subunit, non-ATPase 14	0.483256	6.53561	3.41141	0.0753241	1
9804	ENSG00000173726	TOMM20	translocase of outer mitochondrial membrane 20	-0.446102	5.70976	3.40772	0.0754733	1
148932	ENSG00000142961	MOB3C	MOB kinase activator 3C	-0.814879	3.85891	3.40748	0.075483	1
3915	ENSG00000135862	LAMC1	laminin subunit gamma 1	-0.455338	6.47209	3.40709	0.0754991	1
202333	ENSG00000164309	CMYA5	cardiomyopathy associated 5	0.874011	4.69196	3.40668	0.0755158	1
84269	ENSG00000125611	CHCHD5	coiled-coil-helix-coiled-coil-helix domain containing 5	-0.904864	4.35536	3.40232	0.0756926	1
28977	ENSG00000198015	MRPL42	mitochondrial ribosomal protein L42	0.544215	5.65458	3.40225	0.0756955	1
81929	ENSG00000085415	SEH1L	SEH1 like nucleoporin	-0.668436	3.63179	3.40208	0.0757024	1
85369	ENSG00000143093	STRIP1	striatin interacting protein 1	0.60572	4.66531	3.40153	0.0757249	1
26870	ENSG00000207005	RNU1-2	RNA, U1 small nuclear 2	1.01919	3.43365	3.39858	0.0758447	1
84057	ENSG00000121211	MND1	meiotic nuclear divisions 1	-1.67611	2.31887	3.39828	0.0758571	1
6382	ENSG00000115884	SDC1	syndecan 1	-0.692536	10.5238	3.39769	0.0758808	1
1512	ENSG00000103811	CTSH	cathepsin H	-1.22317	4.20255	3.39756	0.0758861	1
2335	ENSG00000115414	FN1	fibronectin 1	-0.849511	9.11982	3.39552	0.0759697	1
81621	ENSG00000107821	KAZALD1	Kazal type serine peptidase inhibitor domain 1	-2.78962	0.832692	3.43916	0.0759739	1
57150	ENSG00000111850	SMIM8	small integral membrane protein 8	0.879179	3.00156	3.39437	0.0760164	1
4253	ENSG00000150527	MIA2	MIA SH3 domain ER export factor 2	-0.796129	3.05326	3.38972	0.0762067	1
54584	ENSG00000185838	GNB1L	G protein subunit beta 1 like	-2.19227	1.22715	3.38901	0.0762359	1
202309	ENSG00000175857	GAPT	GRB2 binding adaptor protein, transmembrane	1.84736	0.828899	3.38663	0.0763331	1
23431	ENSG00000081014	AP4E1	adaptor related protein complex 4 subunit epsilon 1	-0.789648	3.38135	3.38525	0.07639	1
161779	ENSG00000182405	PGBD4	piggyBac transposable element derived 4	-2.48198	0.775482	3.4282	0.0764127	1
54454	ENSG00000119778	ATAD2B	ATPase family AAA domain containing 2B	0.789523	5.31677	3.38179	0.0765323	1
79736	ENSG00000172171	TEFM	transcription elongation factor, mitochondrial	0.864852	3.30869	3.38088	0.0765696	1
157	ENSG00000100077	GRK3	G protein-coupled receptor kinase 3	0.772332	3.23504	3.37932	0.0766338	1
57110	ENSG00000127252	PLAAT1	phospholipase A and acyltransferase 1	-2.48477	0.775993	3.42208	0.0766592	1
23421	ENSG00000142856	ITGB3BP	integrin subunit beta 3 binding protein	0.610109	4.83213	3.37837	0.0766732	1
157753	ENSG00000164841	TMEM74	transmembrane protein 74	-2.60551	1.37443	3.37691	0.0767332	1
5322	ENSG00000127472	PLA2G5	phospholipase A2 group V	0.991213	3.76996	3.37638	0.0767551	1
441818	ENSG00000260389	WBP11P1	WBP11 pseudogene 1	-0.676495	3.88931	3.37335	0.0768806	1
146722	ENSG00000186074	CD300LF	CD300 molecule like family member f	-2.52904	0.784776	3.41642	0.0768877	1
105374103	NA	NA	NA	-1.94051	1.46727	3.36976	0.077029	1
28959	ENSG00000106565	TMEM176B	transmembrane protein 176B	0.557981	5.62658	3.36806	0.0770995	1
3017	ENSG00000158373	H2BC5	H2B clustered histone 5	-0.701275	4.38739	3.36628	0.0771736	1
5591	ENSG00000253729	PRKDC	protein kinase, DNA-activated, catalytic subunit	-0.533083	6.16714	3.36621	0.0771767	1
84545	ENSG00000055950	MRPL43	mitochondrial ribosomal protein L43	-0.747566	4.36828	3.36186	0.0773572	1
11113	ENSG00000122966	CIT	citron rho-interacting serine/threonine kinase	-1.48391	1.79055	3.36027	0.0774238	1
8777	ENSG00000107186	MPDZ	multiple PDZ domain crumbs cell polarity complex component	-0.982396	3.60932	3.3585	0.0774975	1
84812	ENSG00000115556	PLCD4	phospholipase C delta 4	1.62828	1.16424	3.35813	0.0775131	1
2621	ENSG00000183087	GAS6	growth arrest specific 6	-1.19741	2.79408	3.35517	0.0776366	1
23513	ENSG00000180900	SCRIB	scribble planar cell polarity protein	-0.962127	2.72128	3.35343	0.0777095	1
9863	ENSG00000187391	MAGI2	membrane associated guanylate kinase, WW and PDZ domain containing 2	-2.56442	0.791606	3.39495	0.0777624	1
145389	ENSG00000139974	SLC38A6	solute carrier family 38 member 6	1.25946	3.1466	3.35179	0.0777783	1
51253	ENSG00000116221	MRPL37	mitochondrial ribosomal protein L37	-0.583562	4.21689	3.35144	0.0777927	1
7018	ENSG00000091513	TF	transferrin	-2.59908	0.798436	3.38959	0.0779825	1
29777	ENSG00000146109	ABT1	activator of basal transcription 1	-0.675112	3.68093	3.34427	0.0780943	1
497258	ENSG00000245573	BDNF-AS	BDNF antisense RNA	-1.99954	1.1836	3.34173	0.0782013	1
100506746	NA	AFF1-AS1	AFF1 antisense RNA 1	0.488491	5.49682	3.33869	0.0783296	1
4259	ENSG00000143198	MGST3	microsomal glutathione S-transferase 3	0.60141	9.98733	3.33811	0.0783538	1
11140	ENSG00000105401	CDC37	cell division cycle 37, HSP90 cochaperone	-0.632392	3.88126	3.33759	0.0783758	1
613037	ENSG00000198064	NPIPB13	nuclear pore complex interacting protein family, member B13	0.905772	5.37169	3.33499	0.0784859	1
6814	ENSG00000116266	STXBP3	syntaxin binding protein 3	0.577593	5.83768	3.3337	0.0785408	1
11069	ENSG00000091428	RAPGEF4	Rap guanine nucleotide exchange factor 4	-2.42334	1.33411	3.33344	0.0785518	1
153129	ENSG00000177058	SLC38A9	solute carrier family 38 member 9	0.544903	5.98284	3.33332	0.0785568	1
25861	ENSG00000095397	WHRN	whirlin	-2.58808	0.796074	3.37355	0.0786453	1
5481	ENSG00000171497	PPID	peptidylprolyl isomerase D	0.511027	5.48913	3.32979	0.0787067	1
10653	ENSG00000167642	SPINT2	serine peptidase inhibitor, Kunitz type 2	-0.613663	8.10705	3.32943	0.0787219	1
3426	ENSG00000205403	CFI	complement factor I	1.25892	2.78411	3.32935	0.0787252	1
483	ENSG00000069849	ATP1B3	ATPase Na+/K+ transporting subunit beta 3	-0.482665	5.98389	3.32903	0.0787387	1
85002	ENSG00000186523	FAM86B1	family with sequence similarity 86 member B1	-1.71429	1.43596	3.32582	0.0788755	1
51268	ENSG00000179761	PIPOX	pipecolic acid and sarcosine oxidase	-2.27081	1.2844	3.32545	0.078891	1
9289	ENSG00000205336	ADGRG1	adhesion G protein-coupled receptor G1	-0.493538	6.53765	3.32535	0.0788956	1
26060	ENSG00000157500	APPL1	adaptor protein, phosphotyrosine interacting with PH domain and leucine zipper 1	-0.640052	4.34483	3.32421	0.078944	1
6289	ENSG00000134339	SAA2	serum amyloid A2	1.72188	0.890346	3.32336	0.0789803	1
51319	ENSG00000174891	RSRC1	arginine and serine rich coiled-coil 1	0.50486	5.37431	3.32327	0.0789841	1
79086	ENSG00000214046	SMIM7	small integral membrane protein 7	0.563627	6.57023	3.32235	0.0790235	1
64785	ENSG00000181938	GINS3	GINS complex subunit 3	-1.52866	1.74644	3.31765	0.0792243	1
51491	ENSG00000048162	NOP16	NOP16 nucleolar protein	0.714454	4.52343	3.31652	0.0792725	1
55166	ENSG00000031691	CENPQ	centromere protein Q	-1.06704	3.2449	3.31635	0.0792799	1
55601	ENSG00000137628	DDX60	DExD/H-box helicase 60	0.56046	4.99796	3.31438	0.0793645	1
389114	ENSG00000182983	ZNF662	zinc finger protein 662	1.00354	2.65988	3.31412	0.0793757	1
24149	ENSG00000171467	ZNF318	zinc finger protein 318	0.778766	3.15787	3.31285	0.0794298	1
55779	ENSG00000206530	CFAP44	cilia and flagella associated protein 44	1.77388	1.3712	3.31169	0.0794796	1
6468	ENSG00000107829	FBXW4	F-box and WD repeat domain containing 4	-0.556807	5.14819	3.30934	0.0795807	1
7378	ENSG00000183696	UPP1	uridine phosphorylase 1	-0.844826	5.20457	3.30776	0.079649	1
400	ENSG00000120805	ARL1	ADP ribosylation factor like GTPase 1	0.575877	6.74634	3.30753	0.0796586	1
9337	ENSG00000155508	CNOT8	CCR4-NOT transcription complex subunit 8	-0.675927	3.94851	3.30681	0.0796895	1
65989	ENSG00000171462	DLK2	delta like non-canonical Notch ligand 2	-2.87788	0.866405	3.34735	0.079742	1
10248	ENSG00000172336	POP7	POP7 homolog, ribonuclease P/MRP subunit	-0.757482	3.81653	3.30501	0.0797673	1
728066	NA	FAM133DP	family with sequence similarity 133, member A pseudogene	0.551828	4.94156	3.30221	0.079888	1
164395	ENSG00000131044	TTLL9	tubulin tyrosine ligase like 9	-2.8128	0.852204	3.34282	0.0799334	1
153443	ENSG00000151304	SRFBP1	serum response factor binding protein 1	0.838848	3.82267	3.29866	0.0800416	1
57633	ENSG00000175928	LRRN1	leucine rich repeat neuronal 1	-2.4512	0.769442	3.33853	0.080115	1
430	ENSG00000183734	ASCL2	achaete-scute family bHLH transcription factor 2	-1.47101	3.78925	3.29391	0.0802477	1
102467146	ENSG00000261390	MAFTRR	MAF transcriptional regulator RNA	-3.16107	0.944169	3.33368	0.080321	1
5756	ENSG00000151239	TWF1	twinfilin actin binding protein 1	-0.600485	4.64302	3.29098	0.080375	1
55771	ENSG00000068489	PRR11	proline rich 11	-0.79439	3.57027	3.29047	0.0803972	1
65260	ENSG00000162377	COA7	cytochrome c oxidase assembly factor 7	0.887871	3.01777	3.28881	0.0804696	1
55651	ENSG00000145912	NHP2	NHP2 ribonucleoprotein	-0.781425	3.52767	3.28575	0.0806031	1
23505	ENSG00000075568	TMEM131	transmembrane protein 131	-0.495735	5.10177	3.28457	0.0806547	1
100189399	NA	TRK-CTT2-2	tRNA-Lys (anticodon CTT) 2-2	1.51347	1.37235	3.28434	0.0806647	1
92960	ENSG00000104883	PEX11G	peroxisomal biogenesis factor 11 gamma	1.86267	0.931431	3.28282	0.080731	1
57178	ENSG00000108175	ZMIZ1	zinc finger MIZ-type containing 1	-0.845581	3.64265	3.27974	0.0808658	1
3778	ENSG00000156113	KCNMA1	potassium calcium-activated channel subfamily M alpha 1	-1.56684	1.78513	3.27945	0.0808787	1
26865	ENSG00000206596	RNU1-27P	RNA, U1 small nuclear 27, pseudogene	0.969713	3.28001	3.27899	0.0808986	1
4697	ENSG00000189043	NDUFA4	NDUFA4 mitochondrial complex associated	0.446521	5.88266	3.27822	0.0809324	1
6120	ENSG00000197713	RPE	ribulose-5-phosphate-3-epimerase	0.963796	2.27763	3.27779	0.0809513	1
219402	ENSG00000122033	MTIF3	mitochondrial translational initiation factor 3	0.564253	5.20652	3.27337	0.0811454	1
27098	ENSG00000079101	CLUL1	clusterin like 1	-2.74375	0.832321	3.3141	0.0811588	1
51266	ENSG00000165682	CLEC1B	C-type lectin domain family 1 member B	-2.68695	0.820449	3.31208	0.0812458	1
167359	ENSG00000177453	NIM1K	NIM1 serine/threonine protein kinase	-2.03911	1.19601	3.27041	0.0812757	1
284611	ENSG00000162636	EEIG2	EEIG family member 2	-0.970363	2.9818	3.27039	0.0812768	1
10150	ENSG00000139793	MBNL2	muscleblind like splicing regulator 2	-0.457982	5.67928	3.26941	0.08132	1
246100	ENSG00000268651	CTAG1A	cancer/testis antigen 1A	1.8591	0.931858	3.26881	0.0813465	1
1485	ENSG00000184033	CTAG1B	cancer/testis antigen 1B	1.8591	0.931858	3.26881	0.0813465	1
114907	ENSG00000156804	FBXO32	F-box protein 32	-0.566821	4.80216	3.2674	0.0814086	1
57677	ENSG00000142065	ZFP14	ZFP14 zinc finger protein	1.15386	2.74511	3.26705	0.0814241	1
5163	ENSG00000152256	PDK1	pyruvate dehydrogenase kinase 1	-1.23134	1.95568	3.26686	0.0814323	1
256006	ENSG00000145700	ANKRD31	ankyrin repeat domain 31	-2.82356	0.848577	3.3048	0.0815605	1
200150	ENSG00000180287	PLD5	phospholipase D family member 5	-2.57574	0.793873	3.30225	0.0816712	1
10128	ENSG00000138095	LRPPRC	leucine rich pentatricopeptide repeat containing	-0.473043	5.32336	3.26125	0.0816804	1
55602	ENSG00000168564	CDKN2AIP	CDKN2A interacting protein	-0.831837	3.60344	3.26003	0.0817347	1
57634	ENSG00000183495	EP400	E1A binding protein p400	0.674137	5.38406	3.25546	0.0819374	1
650226	NA	LOC650226	ankyrin repeat domain containing 26 pseudogene	1.8143	0.970898	3.25527	0.081946	1
51258	ENSG00000111639	MRPL51	mitochondrial ribosomal protein L51	0.475319	5.41235	3.2552	0.0819492	1
5037	ENSG00000089220	PEBP1	phosphatidylethanolamine binding protein 1	-0.475634	6.78638	3.25478	0.081968	1
55254	ENSG00000176142	TMEM39A	transmembrane protein 39A	0.557584	4.49627	3.25349	0.0820251	1
9276	ENSG00000184432	COPB2	COPI coat complex subunit beta 2	0.492357	7.14108	3.25328	0.0820344	1
1050	ENSG00000245848	CEBPA	CCAAT enhancer binding protein alpha	-0.596818	7.89625	3.25296	0.0820489	1
5686	ENSG00000143106	PSMA5	proteasome 20S subunit alpha 5	0.562202	7.79031	3.25288	0.0820523	1
187	ENSG00000134817	APLNR	apelin receptor	-0.632779	4.3392	3.2527	0.0820602	1
102724368	ENSG00000228350	LINC02585	long intergenic non-protein coding RNA 2585	-2.56459	0.791561	3.29259	0.0820913	1
24144	ENSG00000100109	TFIP11	tuftelin interacting protein 11	1.01667	3.14874	3.25156	0.0821113	1
399744	NA	LINC00999	long intergenic non-protein coding RNA 999	-1.58536	1.56805	3.25091	0.0821401	1
5366	ENSG00000141682	PMAIP1	phorbol-12-myristate-13-acetate-induced protein 1	-0.755137	3.37389	3.25068	0.0821506	1
22897	ENSG00000110274	CEP164	centrosomal protein 164	-0.98763	2.87595	3.24832	0.0822556	1
8085	ENSG00000167548	KMT2D	lysine methyltransferase 2D	0.782087	3.14204	3.24777	0.0822805	1
10664	ENSG00000102974	CTCF	CCCTC-binding factor	-0.44248	5.51463	3.2436	0.082467	1
10971	ENSG00000134308	YWHAQ	tyrosine 3-monooxygenase/tryptophan 5-monooxygenase activation protein theta	-0.512864	4.91279	3.24325	0.0824827	1
285074	ENSG00000285793	ANAPC1P2	ANAPC1 pseudogene 2	1.22643	1.73681	3.24144	0.0825639	1
7386	ENSG00000169021	UQCRFS1	ubiquinol-cytochrome c reductase, Rieske iron-sulfur polypeptide 1	-0.604613	4.8561	3.24136	0.0825672	1
445329	ENSG00000213648	SULT1A4	sulfotransferase family 1A member 4	1.44061	1.35521	3.24075	0.0825947	1
6818	ENSG00000261052	SULT1A3	sulfotransferase family 1A member 3	1.44061	1.35521	3.24075	0.0825947	1
6742	ENSG00000106028	SSBP1	single stranded DNA binding protein 1	0.487848	8.06452	3.24053	0.0826044	1
132158	ENSG00000168237	GLYCTK	glycerate kinase	-1.79846	1.45593	3.24014	0.0826221	1
199964	ENSG00000143001	TMEM61	transmembrane protein 61	-2.29568	0.738256	3.462	0.0826337	1
102723166	ENSG00000260589	STAM-DT	STAM divergent transcript	-2.29568	0.738256	3.462	0.0826337	1
100422960	ENSG00000284305	MIR3179-1	microRNA 3179-1	-2.30347	0.739691	3.45197	0.0826337	1
100422886	ENSG00000257381	MIR3179-2	microRNA 3179-2	-2.30347	0.739691	3.45197	0.0826337	1
100873985	NA	MED14OS	MED14 opposite strand	-2.3014	0.7393	3.44844	0.0826337	1
114795	ENSG00000139364	TMEM132B	transmembrane protein 132B	-2.31031	0.74096	3.45026	0.0826337	1
92086	ENSG00000149435	GGTLC1	gamma-glutamyltransferase light chain 1	-2.31585	0.741983	3.84353	0.0826337	1
3111	ENSG00000204252	HLA-DOA	major histocompatibility complex, class II, DO alpha	-2.31585	0.741983	3.84353	0.0826337	1
378884	ENSG00000187566	NHLRC1	NHL repeat containing E3 ubiquitin protein ligase 1	-2.33114	0.744808	3.43492	0.0826337	1
259307	ENSG00000104951	IL4I1	interleukin 4 induced 1	-2.32716	0.744052	3.4284	0.0826337	1
641451	ENSG00000207468	SNORA19	small nucleolar RNA, H/ACA box 19	-2.33399	0.745321	3.81595	0.0826337	1
100289341	ENSG00000268996	MAN1B1-DT	MAN1B1 divergent transcript	-2.33399	0.745321	3.81595	0.0826337	1
388125	ENSG00000205502	C2CD4B	C2 calcium dependent domain containing 4B	-2.33464	0.745441	3.42716	0.0826337	1
101926896	ENSG00000262686	GLIS2-AS1	GLIS2 antisense RNA 1	-2.3435	0.747099	3.4296	0.0826337	1
53833	ENSG00000174564	IL20RB	interleukin 20 receptor subunit beta	-2.3435	0.747099	3.4296	0.0826337	1
100287227	NA	TIPARP-AS1	TIPARP antisense RNA 1	-2.3484	0.748002	3.42558	0.0826337	1
101929322	NA	LOC101929322	integrator complex subunit 4 pseudogene	-2.34375	0.747123	3.42131	0.0826337	1
3640	ENSG00000248099	INSL3	insulin like 3	-2.34727	0.747757	3.41379	0.0826337	1
340512	ENSG00000230782	LOC340512	uncharacterized LOC340512	-2.35486	0.74917	3.41352	0.0826337	1
200420	ENSG00000290727	ALMS1P1	ALMS1 pseudogene 1	-2.35283	0.74878	3.40994	0.0826337	1
440590	ENSG00000203995	ZYG11A	zyg-11 family member A, cell cycle regulator	-2.34977	0.748207	3.40713	0.0826337	1
7473	ENSG00000108379	WNT3	Wnt family member 3	-2.3566	0.749476	3.40631	0.0826337	1
23066	ENSG00000144712	CAND2	cullin associated and neddylation dissociated 2 (putative)	-2.3566	0.749476	3.40631	0.0826337	1
404734	ENSG00000254996	ANKHD1-EIF4EBP3	ANKHD1-EIF4EBP3 readthrough	-2.3626	0.750583	3.40468	0.0826337	1
1953	ENSG00000162591	MEGF6	multiple EGF like domains 6	-2.3589	0.749889	3.40179	0.0826337	1
1959	ENSG00000122877	EGR2	early growth response 2	-2.3589	0.749889	3.40179	0.0826337	1
375719	NA	AQP7P1	aquaporin 7 pseudogene 1	-2.35955	0.75001	3.40183	0.0826337	1
83444	ENSG00000115274	INO80B	INO80 complex subunit B	-2.3556	0.749255	3.39524	0.0826337	1
79927	ENSG00000197245	FAM110D	family with sequence similarity 110 member D	-2.37308	0.75251	3.39753	0.0826337	1
92340	ENSG00000224383	PRR29	proline rich 29	-2.37308	0.75251	3.39753	0.0826337	1
203859	ENSG00000171714	ANO5	anoctamin 5	-2.37004	0.751937	3.39463	0.0826337	1
54929	ENSG00000064545	TMEM161A	transmembrane protein 161A	-2.38178	0.754109	3.39073	0.0826337	1
284751	ENSG00000203999	LINC01270	long intergenic non-protein coding RNA 1270	-2.38178	0.754109	3.39073	0.0826337	1
132203	ENSG00000188817	SNTN	sentan, cilia apical structure protein	-2.38663	0.755009	3.38957	0.0826337	1
441666	ENSG00000291065	LOC441666	zinc finger protein 91 pseudogene	-2.38462	0.75462	3.38596	0.0826337	1
340508	ENSG00000228376	GAS2L1P2	growth arrest specific 2 like 1 pseudogene 2	-2.3863	0.754891	3.3761	0.0826337	1
100113392	ENSG00000271852	SNORD11B	small nucleolar RNA, C/D box 11B	-2.39304	0.755943	3.6535	0.0826337	1
126823	ENSG00000162755	KLHDC9	kelch domain containing 9	-2.41717	0.76032	3.63046	0.0826337	1
105378579	NA	NA	NA	-2.42604	0.761979	3.63345	0.0826337	1
284346	ENSG00000176472	ZNF575	zinc finger protein 575	-2.43206	0.763033	3.6209	0.0826337	1
148418	ENSG00000203943	SAMD13	sterile alpha motif domain containing 13	-2.4502	0.766357	3.61304	0.0826337	1
100874054	ENSG00000228126	FALEC	focally amplified long non-coding RNA in epithelial cancer	-2.47369	0.770559	3.58645	0.0826337	1
28232	ENSG00000176463	SLCO3A1	solute carrier organic anion transporter family member 3A1	-2.47369	0.770559	3.58645	0.0826337	1
641	ENSG00000197299	BLM	BLM RecQ like helicase	-1.426	2.0997	3.23964	0.0826445	1
55027	ENSG00000155393	HEATR3	HEAT repeat containing 3	-2.43954	0.764369	3.27777	0.0827405	1
51382	ENSG00000100554	ATP6V1D	ATPase H+ transporting V1 subunit D	0.525777	7.05154	3.23574	0.0828198	1
51163	ENSG00000138231	DBR1	debranching RNA lariats 1	-1.04075	2.73071	3.23355	0.0829187	1
102724094	ENSG00000227053	MUC12-AS1	MUC12 antisense RNA 1	-2.74268	0.832091	3.27143	0.0830201	1
3914	ENSG00000196878	LAMB3	laminin subunit beta 3	-1.22453	2.85882	3.23117	0.083026	1
8482	ENSG00000138623	SEMA7A	semaphorin 7A (John Milton Hagen blood group)	-0.505844	7.13518	3.22899	0.0831243	1
6535	ENSG00000130821	SLC6A8	solute carrier family 6 member 8	-0.624717	4.74784	3.22505	0.083303	1
728577	ENSG00000154529	CNTNAP3B	contactin associated protein family member 3B	-2.10532	1.22319	3.22233	0.0834261	1
9986	ENSG00000173653	RCE1	Ras converting CAAX endopeptidase 1	-0.890689	2.79107	3.22186	0.0834473	1
3009	ENSG00000184357	H1-5	H1.5 linker histone, cluster member	1.47416	1.35492	3.2211	0.0834817	1
96626	ENSG00000256977	LIMS3	LIM zinc finger domain containing 3	-0.630855	4.2764	3.22067	0.0835017	1
222166	ENSG00000180354	MTURN	maturin, neural progenitor differentiation regulator homolog	-2.09324	1.22879	3.21998	0.0835327	1
285753	ENSG00000183137	CEP57L1	centrosomal protein 57 like 1	0.796835	2.8531	3.21762	0.0836401	1
574036	NA	SERTAD4-AS1	SERTAD4 antisense RNA 1	-1.53431	1.76492	3.21716	0.0836613	1
128346	ENSG00000143110	C1orf162	chromosome 1 open reading frame 162	1.00156	2.84386	3.21609	0.0837097	1
55766	ENSG00000246705	H2AJ	H2A.J histone	-0.908937	4.07249	3.21598	0.0837151	1
91319	ENSG00000099958	DERL3	derlin 3	-1.25885	2.9112	3.21578	0.0837239	1
6532	ENSG00000108576	SLC6A4	solute carrier family 6 member 4	-0.600866	4.66984	3.21305	0.0838484	1
1036	ENSG00000129596	CDO1	cysteine dioxygenase type 1	-0.581148	5.93426	3.21281	0.0838593	1
5297	ENSG00000241973	PI4KA	phosphatidylinositol 4-kinase alpha	-0.470442	5.94183	3.21131	0.0839281	1
63939	ENSG00000196227	FAM217B	family with sequence similarity 217 member B	-0.68747	4.07729	3.21048	0.083966	1
6872	ENSG00000147133	TAF1	TATA-box binding protein associated factor 1	-0.75087	4.39967	3.20252	0.0843309	1
57455	ENSG00000079313	REXO1	RNA exonuclease 1 homolog	1.07361	2.10101	3.2012	0.0843914	1
100132781	NA	LOC100132781	cyclin Y like 1 pseudogene	1.92804	0.93303	3.20084	0.0844079	1
388524	ENSG00000288920	RPSA2	ribosomal protein SA 2	0.474493	8.19119	3.19991	0.0844509	1
10129	ENSG00000073910	FRY	FRY microtubule binding protein	1.15087	2.36391	3.19753	0.0845607	1
10573	ENSG00000086504	MRPL28	mitochondrial ribosomal protein L28	-1.70281	1.79121	3.19649	0.0846086	1
80219	ENSG00000115520	COQ10B	coenzyme Q10B	0.571247	4.72202	3.19565	0.0846471	1
5087	ENSG00000185630	PBX1	PBX homeobox 1	-0.523981	4.66052	3.19413	0.0847176	1
284161	ENSG00000153982	GDPD1	glycerophosphodiester phosphodiesterase domain containing 1	-0.595782	4.88832	3.19365	0.0847396	1
55054	ENSG00000085978	ATG16L1	autophagy related 16 like 1	1.16272	2.73188	3.19242	0.0847965	1
338699	ENSG00000137494	ANKRD42	ankyrin repeat domain 42	0.916072	2.90545	3.19222	0.0848055	1
7307	ENSG00000160201	U2AF1	U2 small nuclear RNA auxiliary factor 1	-0.681408	4.72937	3.19023	0.0848979	1
154075	ENSG00000164483	SAMD3	sterile alpha motif domain containing 3	-2.63129	0.804078	3.22923	0.0849091	1
2131	ENSG00000182197	EXT1	exostosin glycosyltransferase 1	-0.775049	3.29563	3.18892	0.0849587	1
79961	ENSG00000162777	DENND2D	DENN domain containing 2D	0.791116	4.40099	3.18792	0.085005	1
10048	ENSG00000010017	RANBP9	RAN binding protein 9	0.527535	5.31251	3.18352	0.085209	1
9278	ENSG00000236104	ZBTB22	zinc finger and BTB domain containing 22	-0.919062	2.67782	3.18151	0.0853024	1
8797	ENSG00000104689	TNFRSF10A	TNF receptor superfamily member 10a	2.00808	0.960414	3.179	0.0854195	1
573	ENSG00000107262	BAG1	BAG cochaperone 1	-0.486937	5.17256	3.17881	0.0854285	1
57537	ENSG00000184985	SORCS2	sortilin related VPS10 domain containing receptor 2	1.85423	0.730529	3.17877	0.0854303	1
101927481	ENSG00000266258	LINC01909	long intergenic non-protein coding RNA 1909	-2.62675	0.803019	3.21722	0.0854554	1
4513	ENSG00000198712	COX2	cytochrome c oxidase subunit II	0.591954	11.0684	3.1776	0.0854849	1
55686	ENSG00000118242	MREG	melanoregulin	-0.603904	4.29839	3.1766	0.0855316	1
219749	ENSG00000175395	ZNF25	zinc finger protein 25	-1.77745	1.40759	3.17378	0.0856632	1
222901	ENSG00000219451	RPL23P8	ribosomal protein L23 pseudogene 8	0.517892	9.05525	3.17352	0.0856758	1
9462	ENSG00000075391	RASAL2	RAS protein activator like 2	0.482925	6.14871	3.17341	0.0856806	1
79755	ENSG00000141579	ZNF750	zinc finger protein 750	-0.688365	3.67507	3.17128	0.0857804	1
83643	ENSG00000151468	CCDC3	coiled-coil domain containing 3	1.37792	1.41686	3.16677	0.0859921	1
100288142	ENSG00000162825	NBPF20	NBPF member 20	0.753079	8.49906	3.16574	0.0860403	1
7114	ENSG00000205542	TMSB4X	thymosin beta 4 X-linked	0.562563	9.7036	3.16369	0.086137	1
8667	ENSG00000147677	EIF3H	eukaryotic translation initiation factor 3 subunit H	0.491508	8.17637	3.16298	0.0861705	1
57393	ENSG00000147003	CLTRN	collectrin, amino acid transport regulator	1.82748	1.03199	3.16281	0.0861782	1
90441	ENSG00000173545	ZNF622	zinc finger protein 622	-0.761103	3.47391	3.16181	0.0862255	1
64976	ENSG00000185608	MRPL40	mitochondrial ribosomal protein L40	0.594366	5.20407	3.15934	0.0863421	1
50617	ENSG00000105929	ATP6V0A4	ATPase H+ transporting V0 subunit a4	-2.43419	1.67946	3.15914	0.0863513	1
100506622	ENSG00000276476	LINC00540	long intergenic non-protein coding RNA 540	-1.71512	1.61212	3.15848	0.0863827	1
284110	ENSG00000167914	GSDMA	gasdermin A	-2.75499	0.827344	3.1947	0.0864914	1
2674	ENSG00000151892	GFRA1	GDNF family receptor alpha 1	-3.03023	0.906706	3.1946	0.0864962	1
54919	ENSG00000164818	DNAAF5	dynein axonemal assembly factor 5	-1.4418	1.83629	3.15322	0.0866313	1
9382	ENSG00000166685	COG1	component of oligomeric golgi complex 1	-1.00287	2.48644	3.15308	0.0866379	1
100628315	NA	DNM3OS	DNM3 opposite strand/antisense RNA	-1.82377	1.39765	3.15096	0.0867384	1
3176	ENSG00000150540	HNMT	histamine N-methyltransferase	0.553217	4.83202	3.15073	0.0867498	1
6508	ENSG00000114923	SLC4A3	solute carrier family 4 member 3	1.66208	1.03886	3.15038	0.0867662	1
29995	ENSG00000071282	LMCD1	LIM and cysteine rich domains 1	-0.569808	5.34381	3.14749	0.0869035	1
11340	ENSG00000120699	EXOSC8	exosome component 8	0.533168	4.50258	3.14716	0.0869191	1
55718	ENSG00000058600	POLR3E	RNA polymerase III subunit E	-0.765751	3.27766	3.14704	0.0869249	1
23339	ENSG00000166887	VPS39	VPS39 subunit of HOPS complex	-0.59548	3.88635	3.14542	0.087002	1
55577	ENSG00000124357	NAGK	N-acetylglucosamine kinase	0.598575	7.06812	3.14394	0.0870723	1
7272	ENSG00000112742	TTK	TTK protein kinase	1.24494	2.25996	3.14231	0.0871504	1
2907	ENSG00000178719	GRINA	glutamate ionotropic receptor NMDA type subunit associated protein 1	-0.512147	5.15434	3.1413	0.0871984	1
85476	ENSG00000168827	GFM1	G elongation factor mitochondrial 1	-0.73771	4.13422	3.14019	0.0872512	1
152302	ENSG00000186162	CIDECP1	CIDEC pseudogene 1	0.822957	2.80338	3.13925	0.0872964	1
23256	ENSG00000092108	SCFD1	sec1 family domain containing 1	0.426568	6.50522	3.13613	0.0874457	1
7754	NA	ZNF204P	zinc finger protein 204, pseudogene	1.46423	1.71617	3.13504	0.0874977	1
201176	ENSG00000159314	ARHGAP27	Rho GTPase activating protein 27	0.789284	2.92594	3.13379	0.0875575	1
2919	ENSG00000163739	CXCL1	C-X-C motif chemokine ligand 1	-1.03243	4.64019	3.13337	0.087578	1
285540	NA	SEPSECS-AS1	SEPSECS antisense RNA 1 (head to head)	1.76069	1.21496	3.13325	0.0875836	1
5239	ENSG00000154330	PGM5	phosphoglucomutase 5	-2.7625	0.836178	3.16951	0.0876672	1
2224	ENSG00000160752	FDPS	farnesyl diphosphate synthase	0.558997	4.77502	3.13074	0.0877043	1
84233	ENSG00000171202	TMEM126A	transmembrane protein 126A	0.550456	5.07521	3.13049	0.087716	1
4283	ENSG00000138755	CXCL9	C-X-C motif chemokine ligand 9	-2.70554	0.824394	3.16762	0.0877564	1
140465	ENSG00000196465	MYL6B	myosin light chain 6B	0.626282	3.64107	3.12929	0.0877737	1
1318	ENSG00000136867	SLC31A2	solute carrier family 31 member 2	-0.557144	5.50971	3.12807	0.0878324	1
114987	ENSG00000148225	WDR31	WD repeat domain 31	-2.81373	0.846533	3.16471	0.0878936	1
100288805	NA	HYDIN2	HYDIN axonemal central pair apparatus protein 2 (pseudogene)	-2.61958	0.806468	3.1628	0.0879835	1
10152	ENSG00000138443	ABI2	abl interactor 2	-0.725938	3.39253	3.1229	0.0880816	1
153527	ENSG00000146007	ZMAT2	zinc finger matrin-type 2	0.444816	6.63888	3.12119	0.0881645	1
664709	NA	HNRNPA1P10	heterogeneous nuclear ribonucleoprotein A1 pseudogene 10	0.453944	7.27088	3.12015	0.0882146	1
6003	ENSG00000127074	RGS13	regulator of G protein signaling 13	-2.87969	0.872206	3.15574	0.0883178	1
868	ENSG00000114423	CBLB	Cbl proto-oncogene B	0.752921	5.19198	3.11614	0.088409	1
26805	ENSG00000207241	SNORD45A	small nucleolar RNA, C/D box 45A	1.22445	1.89856	3.11564	0.0884333	1
641311	ENSG00000213075	RPL31P11	ribosomal protein L31 pseudogene 11	0.508901	8.89102	3.11507	0.088461	1
256309	ENSG00000168491	CCDC110	coiled-coil domain containing 110	1.77397	0.802819	3.11426	0.0885003	1
54904	ENSG00000147548	NSD3	nuclear receptor binding SET domain protein 3	0.459625	6.09576	3.11409	0.0885087	1
55706	ENSG00000058804	NDC1	NDC1 transmembrane nucleoporin	0.873465	3.34811	3.11363	0.088531	1
59	ENSG00000107796	ACTA2	actin alpha 2, smooth muscle	0.734768	7.48524	3.11315	0.088554	1
57447	ENSG00000165795	NDRG2	NDRG family member 2	-0.575687	5.08709	3.11232	0.0885944	1
83990	ENSG00000136492	BRIP1	BRCA1 interacting helicase 1	-2.41442	1.36725	3.11081	0.0886679	1
5652	ENSG00000052344	PRSS8	serine protease 8	-0.682274	6.09791	3.10777	0.0888158	1
644285	NA	LOC644285	uncharacterized LOC644285	1.06111	2.68297	3.10525	0.088939	1
93517	ENSG00000184860	SDR42E1	short chain dehydrogenase/reductase family 42E, member 1	-2.27357	0.734163	3.14047	0.0890458	1
79746	ENSG00000134463	ECHDC3	enoyl-CoA hydratase domain containing 3	-1.10939	2.56211	3.10254	0.0890715	1
101927624	NA	LINC01150	long intergenic non-protein coding RNA 1150	1.4274	1.77198	3.10135	0.0891298	1
10389	ENSG00000102098	SCML2	Scm polycomb group protein like 2	0.854089	2.9832	3.1006	0.0891662	1
4125	ENSG00000104774	MAN2B1	mannosidase alpha class 2B member 1	-0.893847	2.91429	3.10012	0.0891899	1
6158	ENSG00000108107	RPL28	ribosomal protein L28	-0.974957	7.48337	3.09927	0.0892316	1
54543	ENSG00000196683	TOMM7	translocase of outer mitochondrial membrane 7	0.464782	7.2272	3.09852	0.0892682	1
400655	ENSG00000263711	LINC02864	long intergenic non-protein coding RNA 2864	0.843797	2.99944	3.0958	0.0894019	1
51142	ENSG00000106153	CHCHD2	coiled-coil-helix-coiled-coil-helix domain containing 2	-0.422174	6.09616	3.09515	0.0894338	1
55105	ENSG00000092978	GPATCH2	G-patch domain containing 2	0.52518	4.34009	3.094	0.0894902	1
54468	ENSG00000164654	MIOS	meiosis regulator for oocyte development	0.753581	3.32054	3.09354	0.0895129	1
472	ENSG00000149311	ATM	ATM serine/threonine kinase	0.562681	4.07864	3.09205	0.0895864	1
221786	ENSG00000221909	FAM200A	family with sequence similarity 200 member A	-1.0128	2.29923	3.092	0.0895885	1
7100	ENSG00000187554	TLR5	toll like receptor 5	0.975285	2.24916	3.0916	0.0896081	1
26586	ENSG00000136108	CKAP2	cytoskeleton associated protein 2	-1.05269	2.94785	3.09027	0.0896737	1
27089	ENSG00000164405	UQCRQ	ubiquinol-cytochrome c reductase complex III subunit VII	0.484086	6.75213	3.08967	0.0897035	1
79741	ENSG00000216937	CCDC7	coiled-coil domain containing 7	0.78782	3.16182	3.08882	0.0897454	1
100128653	NA	LOC100128653	uncharacterized LOC100128653	0.954403	2.20475	3.08715	0.0898277	1
2857	ENSG00000171659	GPR34	G protein-coupled receptor 34	0.693097	3.73615	3.08652	0.0898587	1
105373759	NA	LOC105373759	uncharacterized LOC105373759	-2.32267	0.743252	3.12248	0.0899122	1
[truncated: 26,473 more rows]

## Sheet: Table S4
GSEA with Preterm-warm vs Preterm-cold DEGs: KEGG Signalling pathways (Positive enrichment)
[truncated: 18 more rows]

[truncated: 2 more sheets: Table S5, Table S6]
